# Supplementary material for: Therapeutic Cancer Vaccination with Immunopeptidomics-Discovered Antigens Confers Protective Antitumor Efficacy
Source: MDPI journal article supplement (doi:10.3390/cancers13143408), 2021-07-07

Endogenous: PrecursorError(ppm): -6.13 DeNovoScore: 89 MSGFScore: 57 SpecEValue: 9.37E-09 Evalue: 3.88E-06  
Synthetic: PrecursorError(ppm): 0.35 DeNovoScore: 109 MSGFScore: 78 SpecEValue: 1.60E-09 Evalue: 6.62E-07

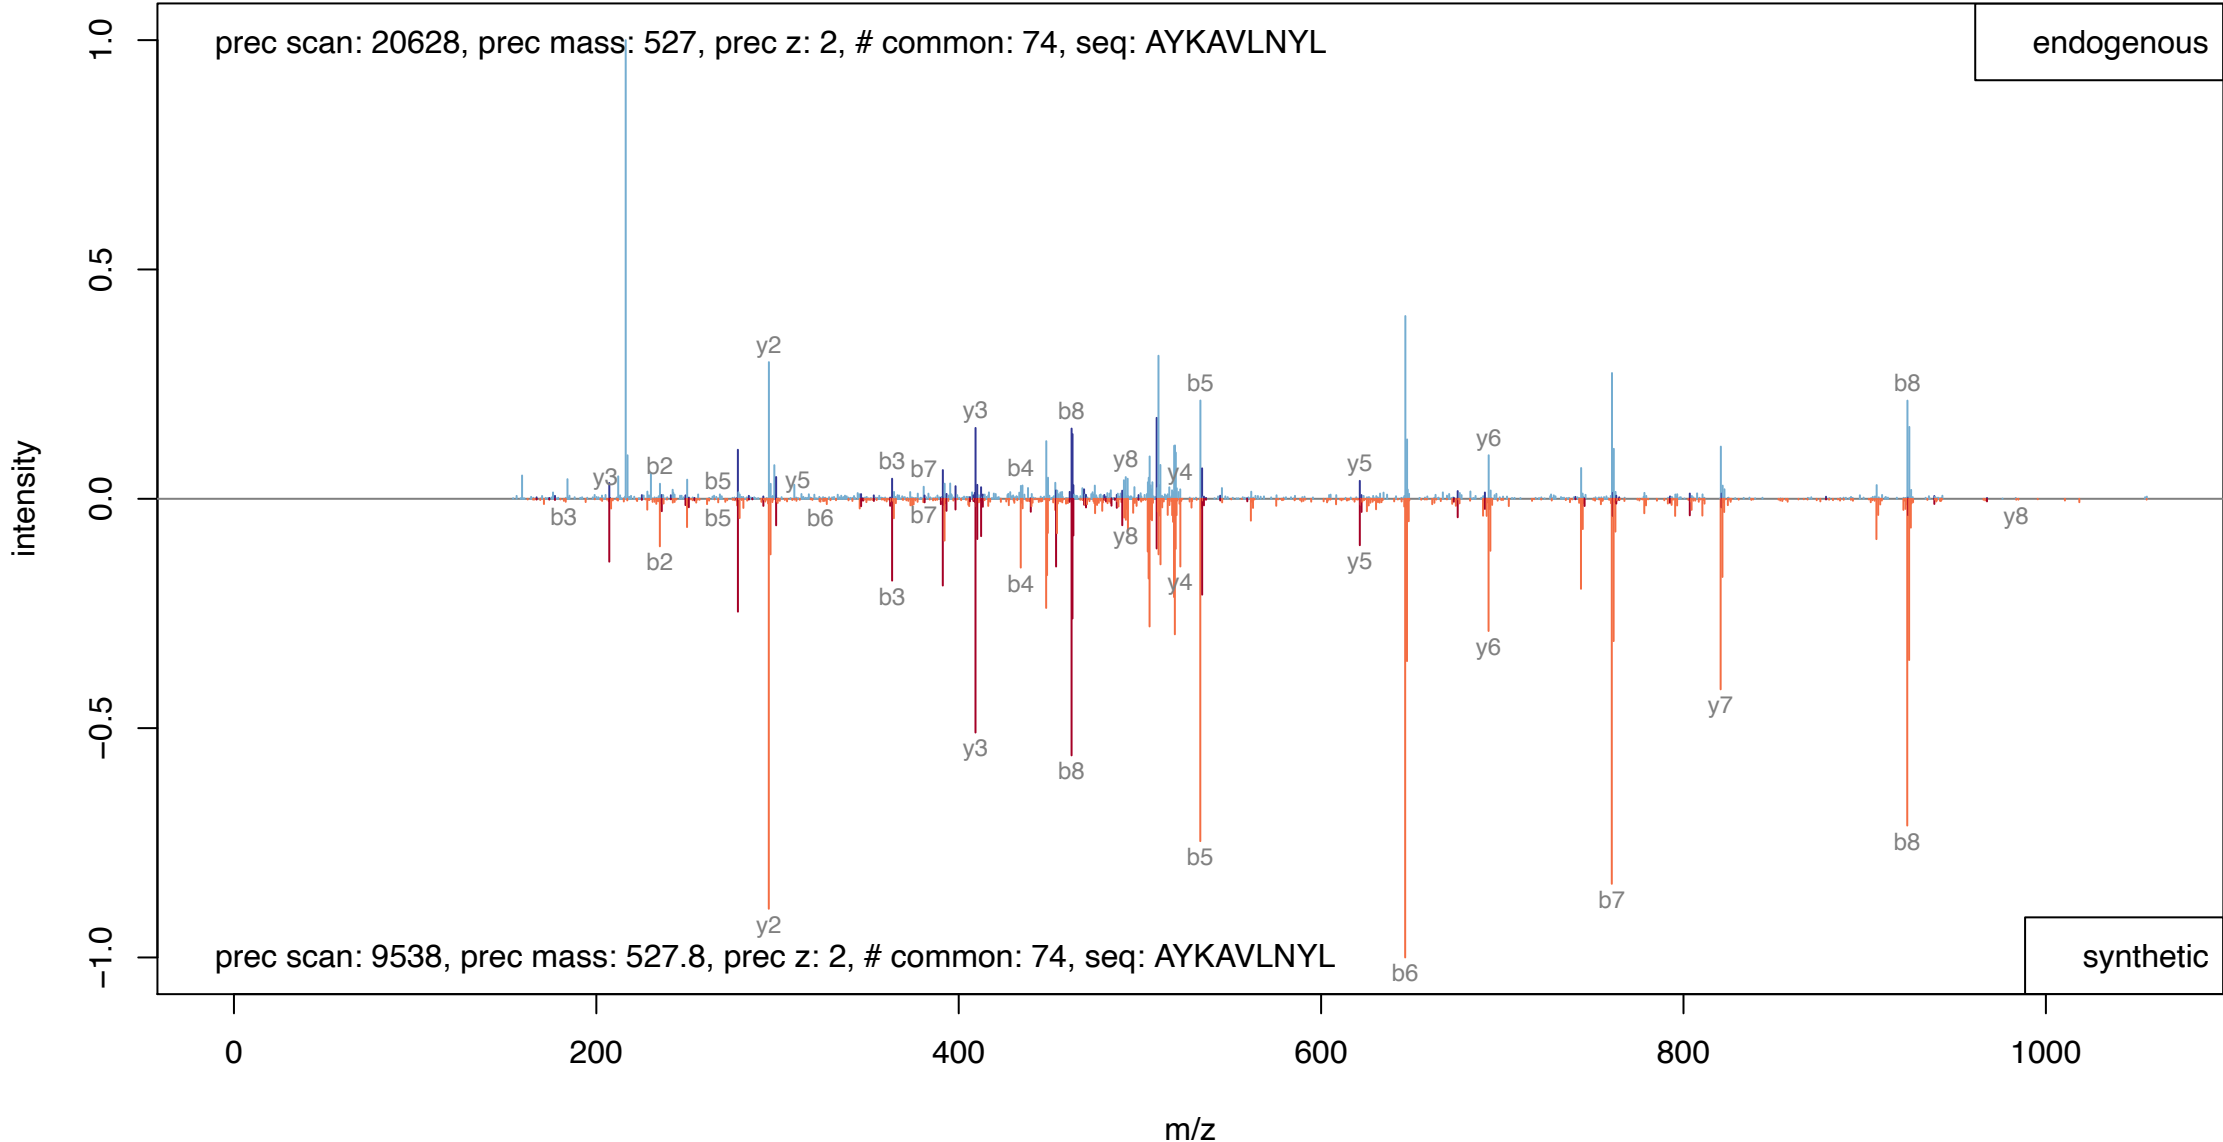

Endogenous: PrecursorError(ppm): -6.15 DeNovoScore: 50 MSGFScore: 43 SpecEValue: 1.60E-11 Evalue: 6.64E-09  
Synthetic: PrecursorError(ppm): 1.27 DeNovoScore: 99 MSGFScore: 99 SpecEValue: 3.13E-12 Evalue: 1.29E-09

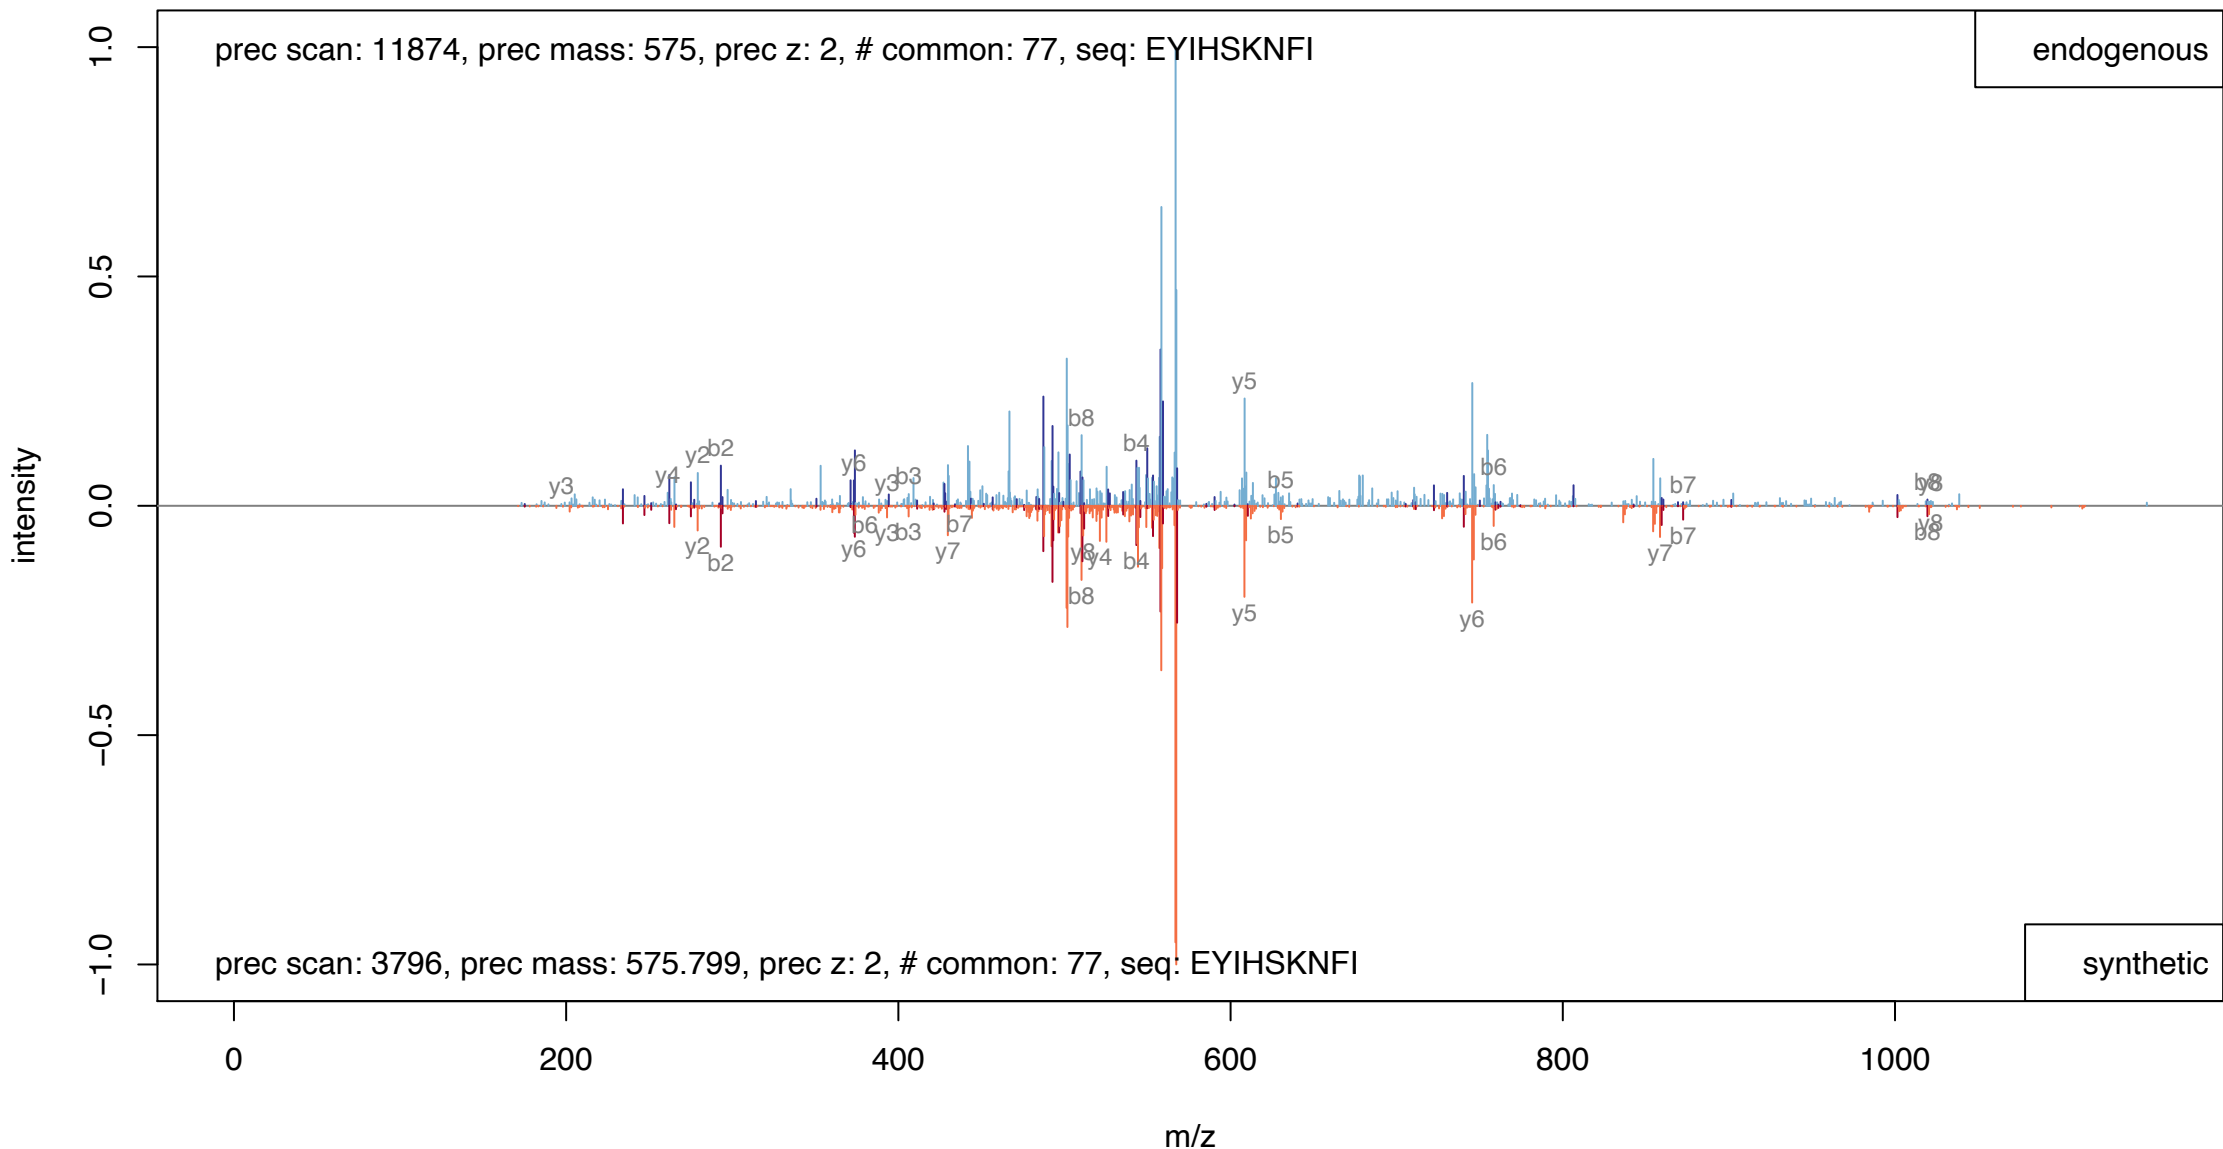

Endogenous: PrecursorError(ppm): -3.13 DeNovoScore: 144 MSGFScore: 90 SpecEValue: 2.10E-08 Evalue: 8.70E-06  
Synthetic: PrecursorError(ppm): 0.35 DeNovoScore: 144 MSGFScore: 100 SpecEValue: 8.07E-09 Evalue: 3.34E-06

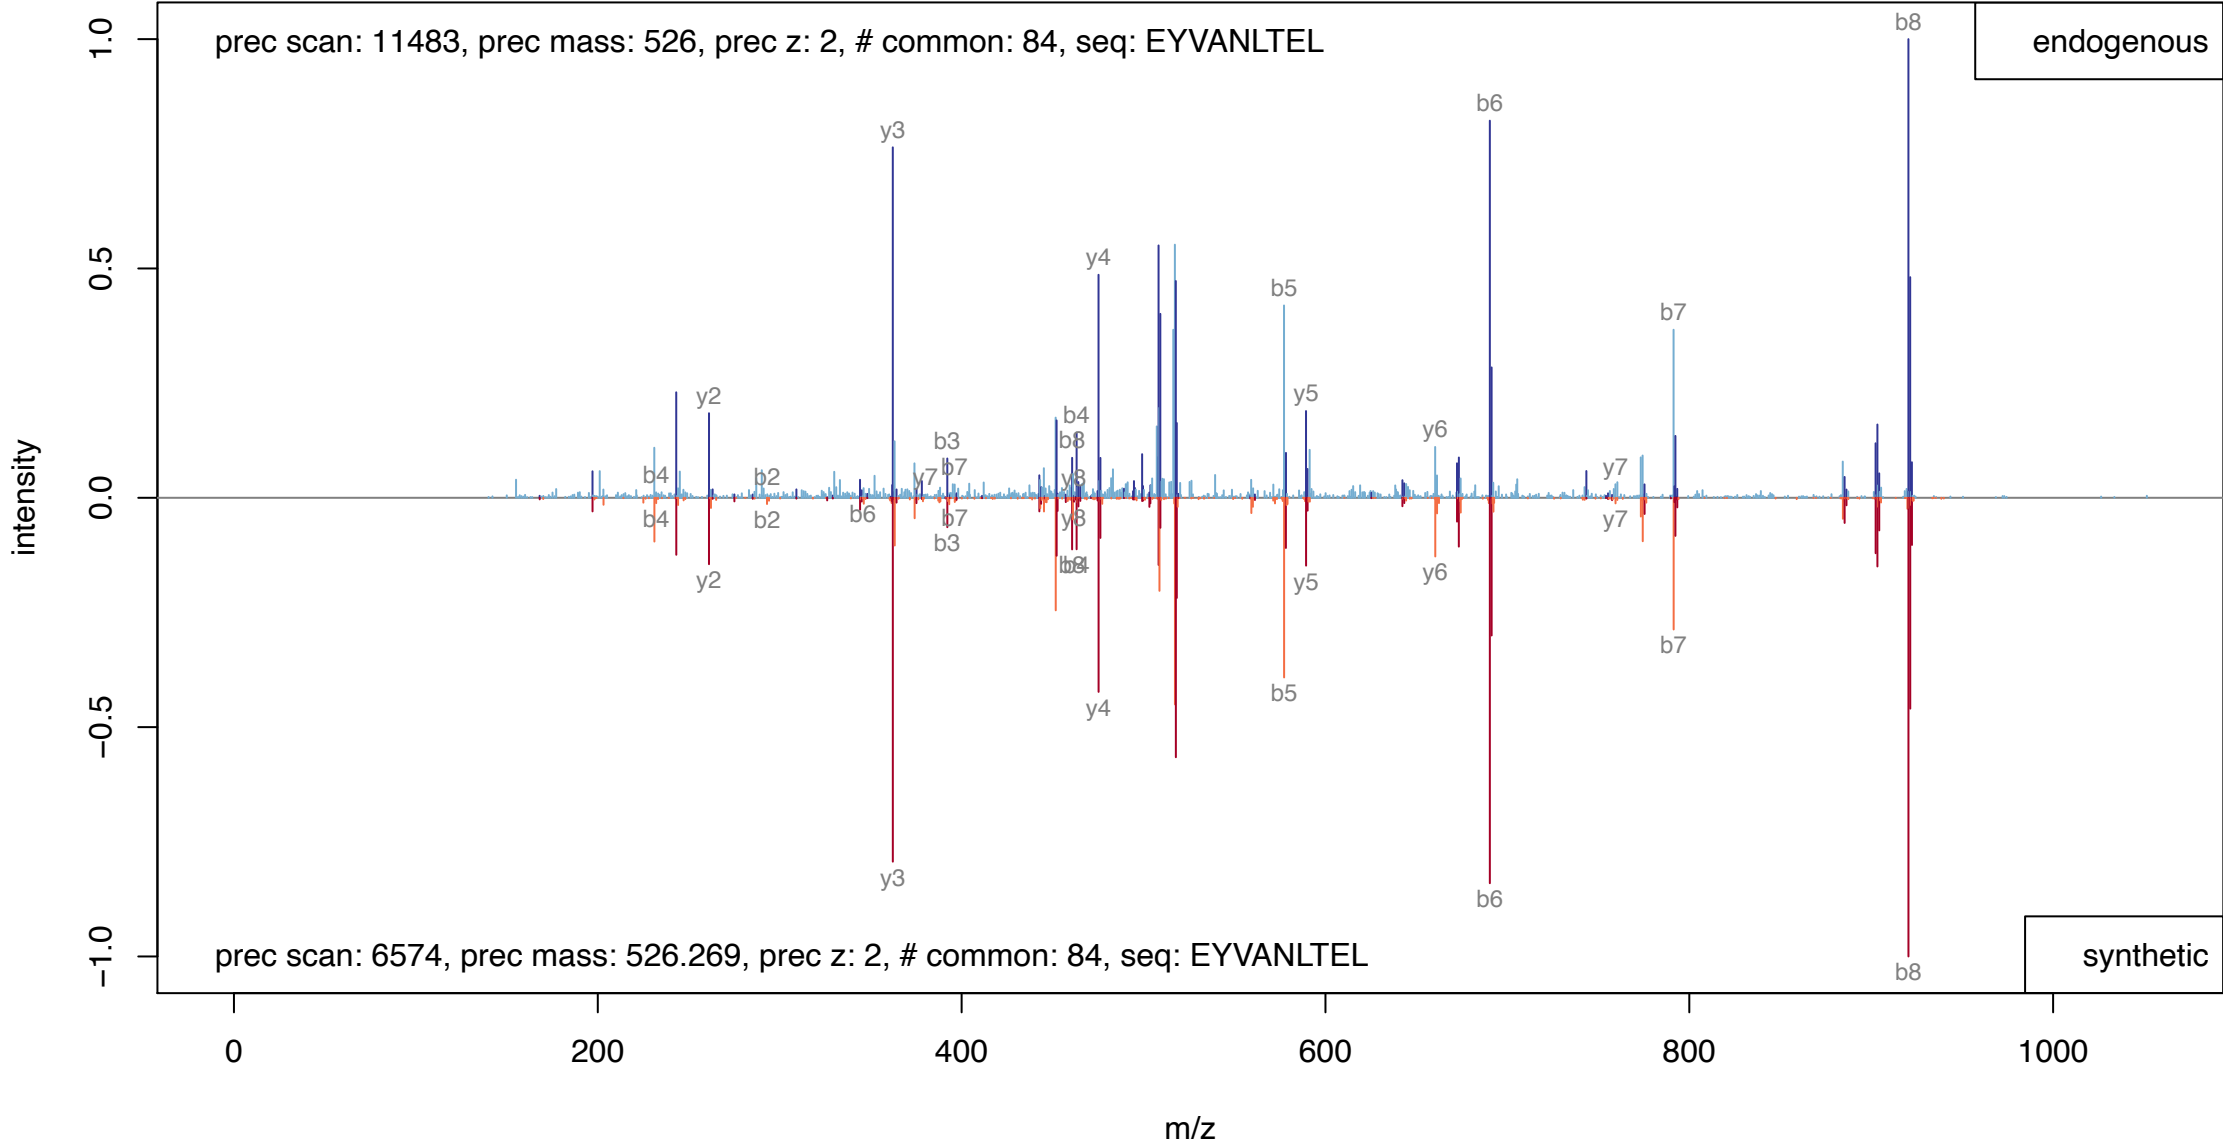

Endogenous: PrecursorError(ppm): -6.28 DeNovoScore: 72 MSGFScore: 24 SpecEValue: 2.11E-05 Evalue: 8.72E-03  
Synthetic: PrecursorError(ppm): 0.64 DeNovoScore: 52 MSGFScore: 15 SpecEValue: 4.43E-06 Evalue: 1.83E-03

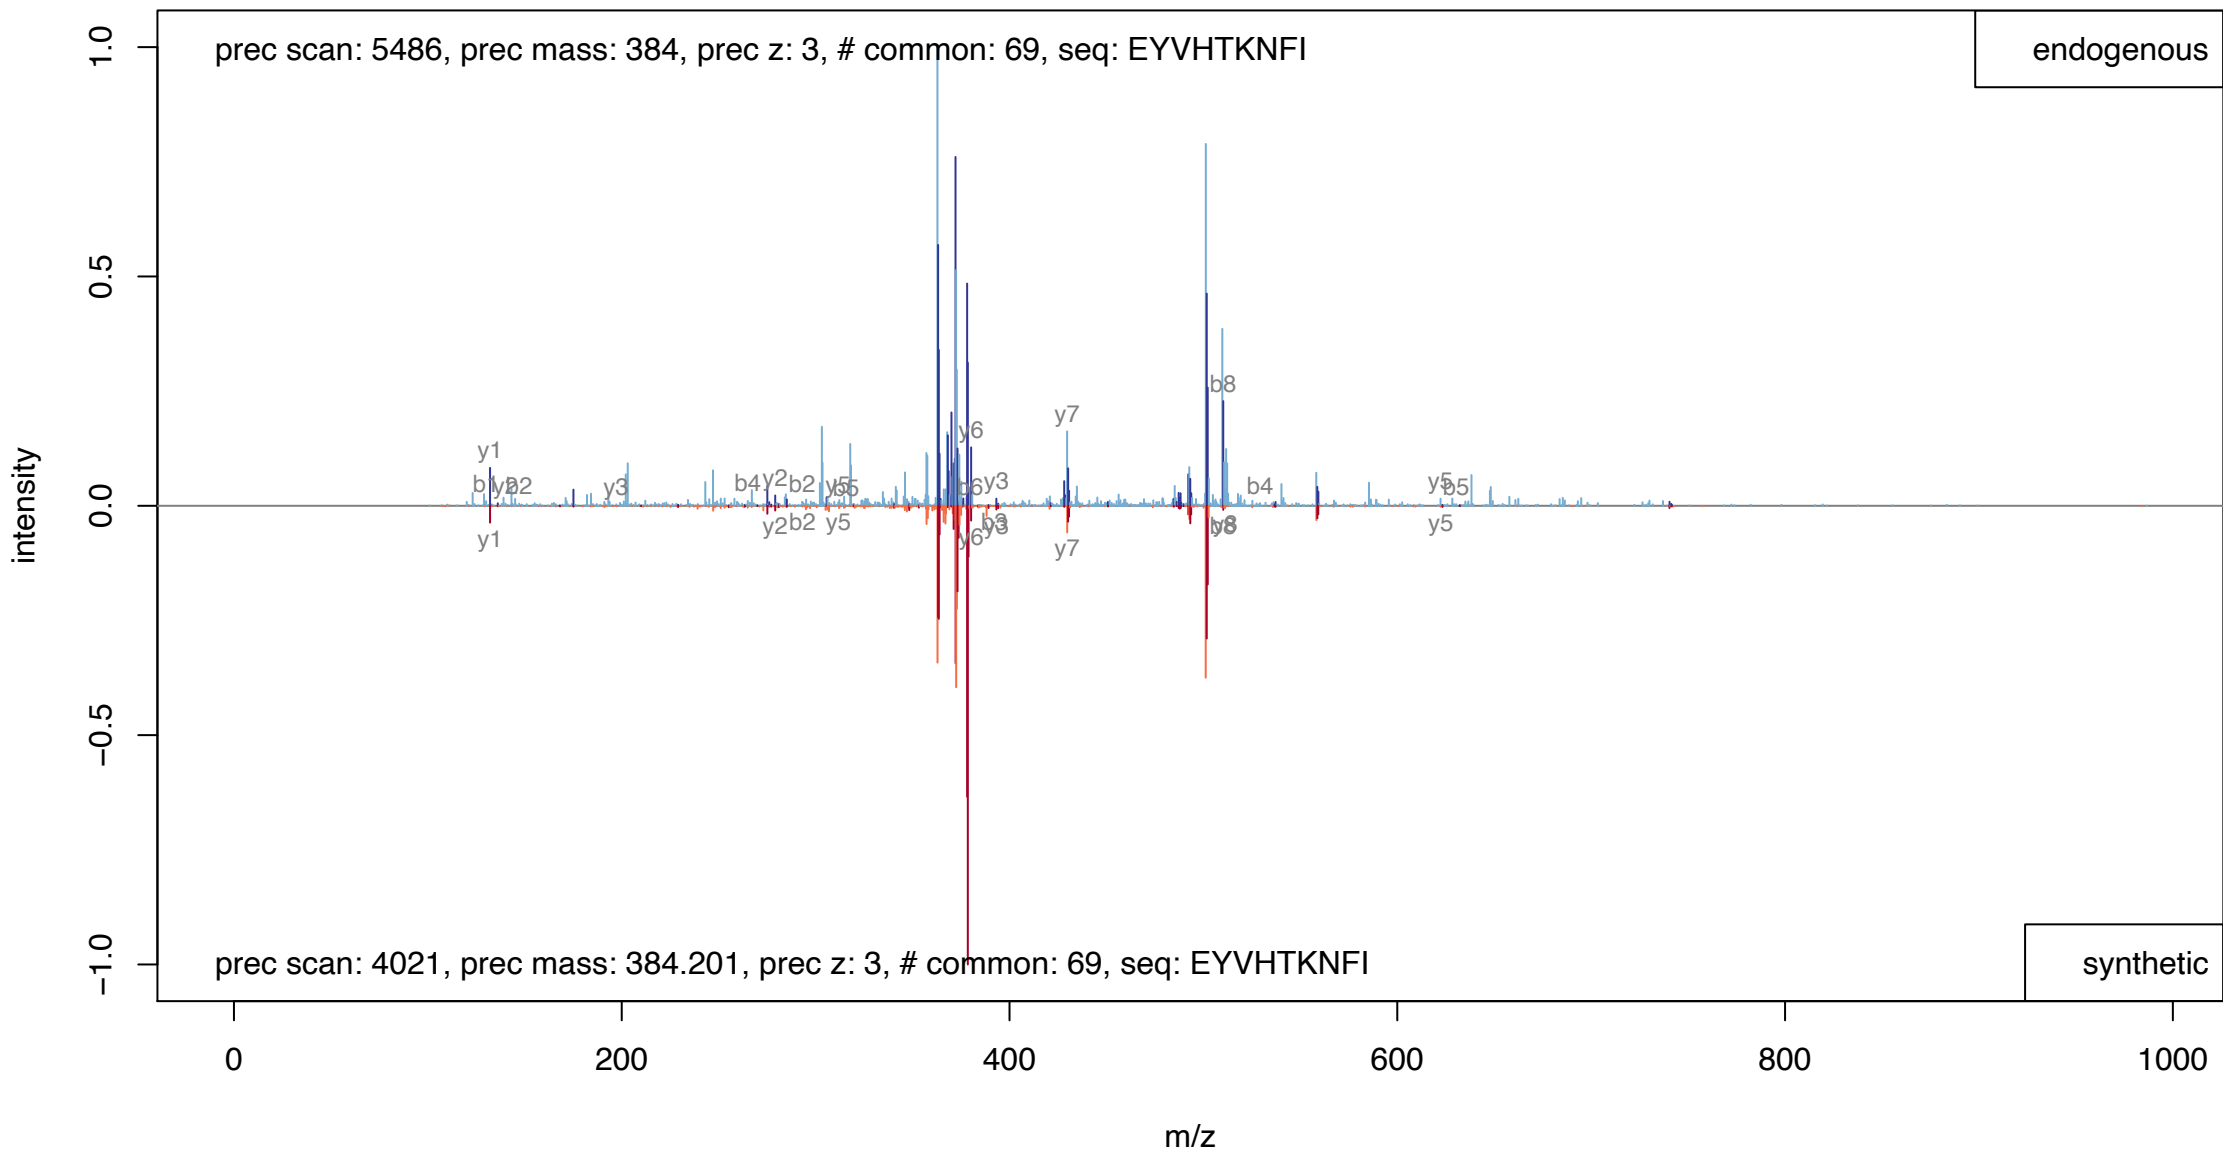

Endogenous: PrecursorError(ppm): -6.92 DeNovoScore: 91 MSGFScore: 65 SpecEValue: 8.50E-10 Evalue: 3.52E-07

Synthetic: PrecursorError(ppm): 0.21 DeNovoScore: 134 MSGFScore: 123 SpecEValue: 3.80E-11 Evalue: 1.57E-08

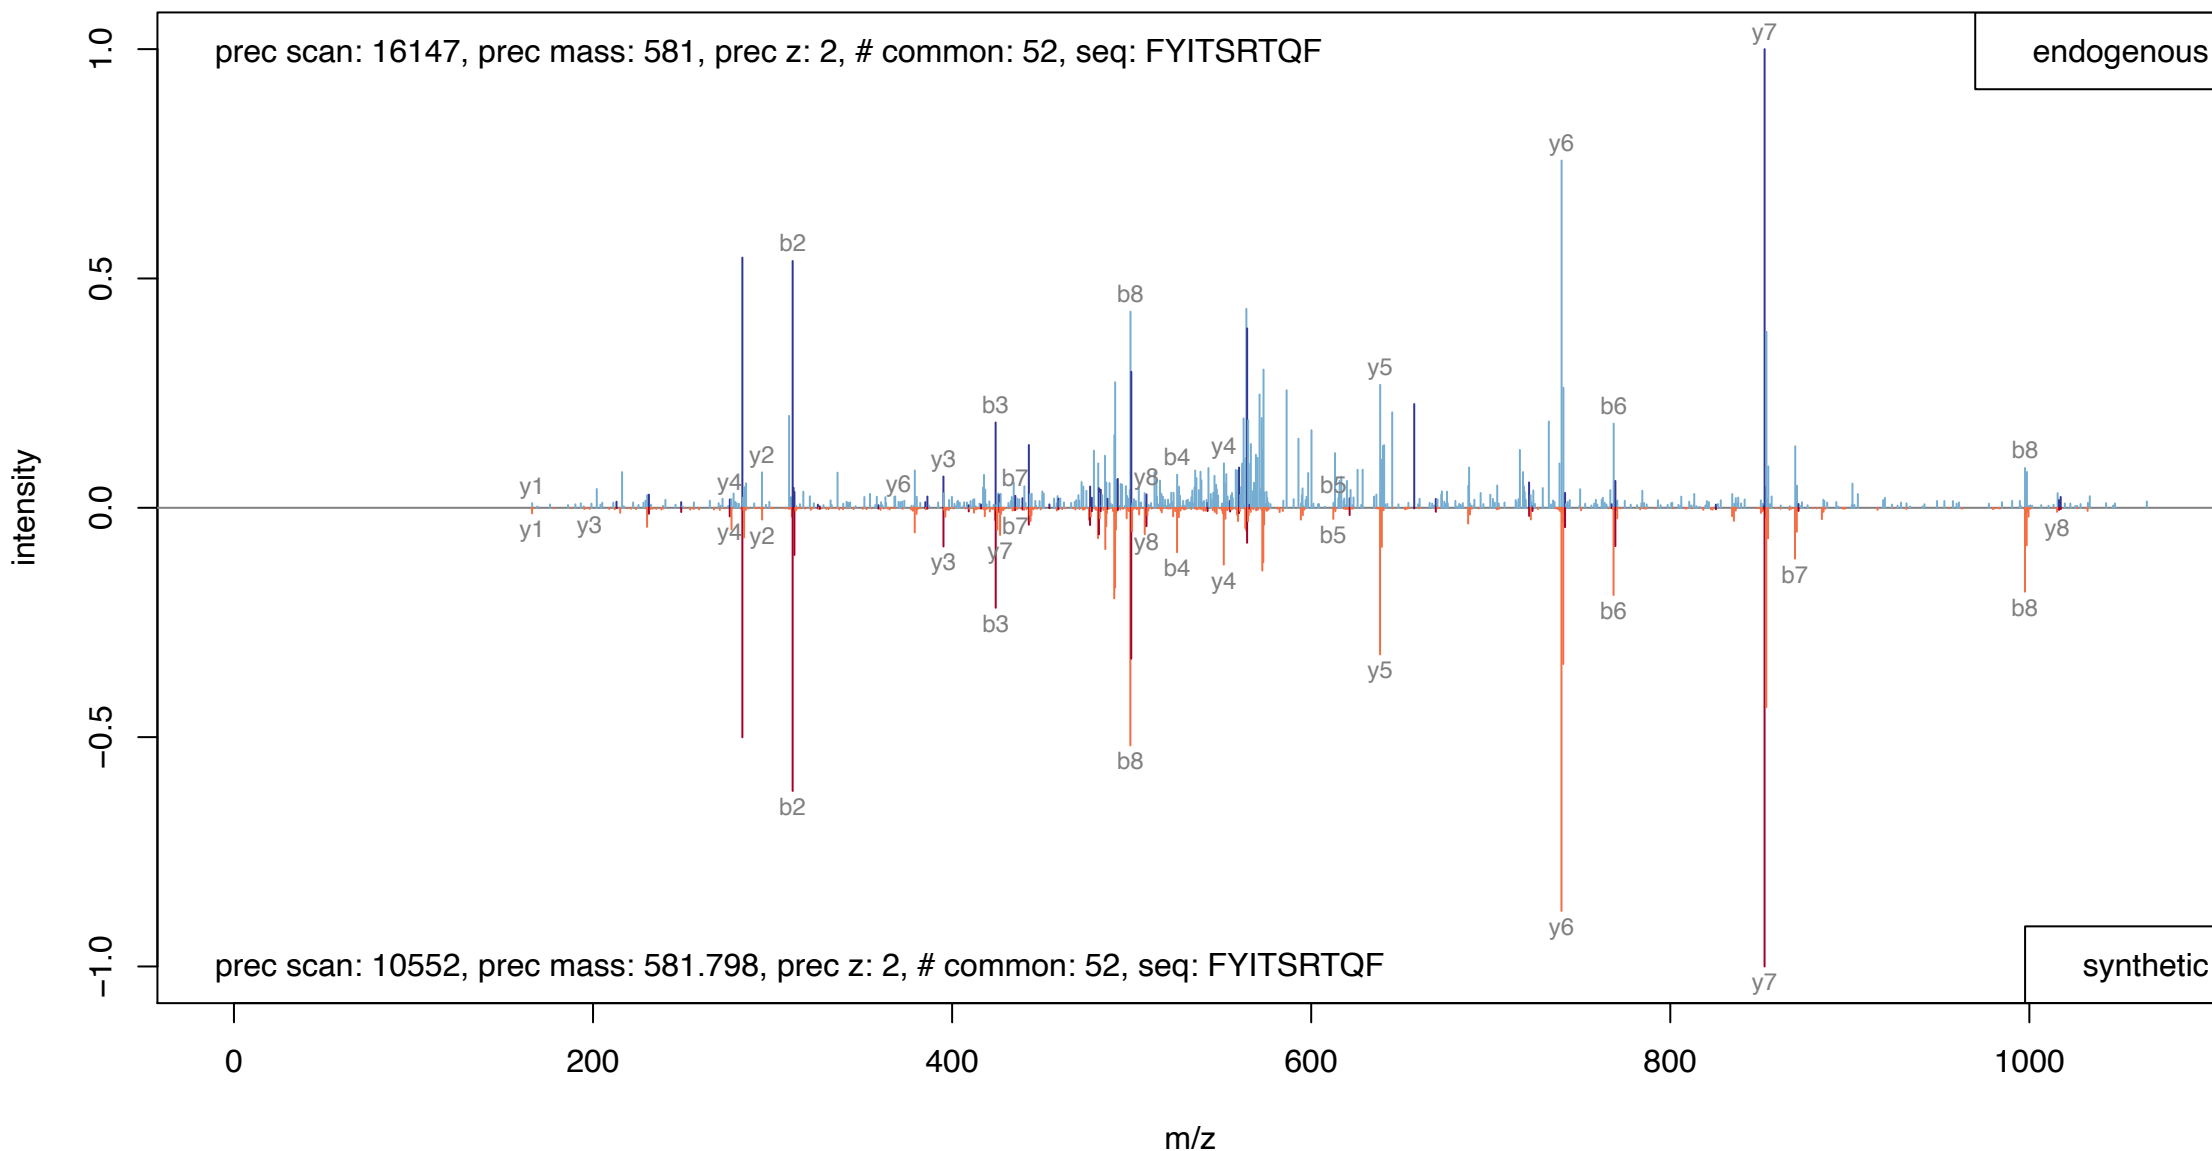

Endogenous: PrecursorError(ppm): -8.76 DeNovoScore: 28 MSGFScore: 11 SpecEValue: 1.75E-09 Evalue: 7.23E-07  
Synthetic: PrecursorError(ppm): -1.56 DeNovoScore: 58 MSGFScore: 46 SpecEValue: 6.81E-11 Evalue: 2.82E-08

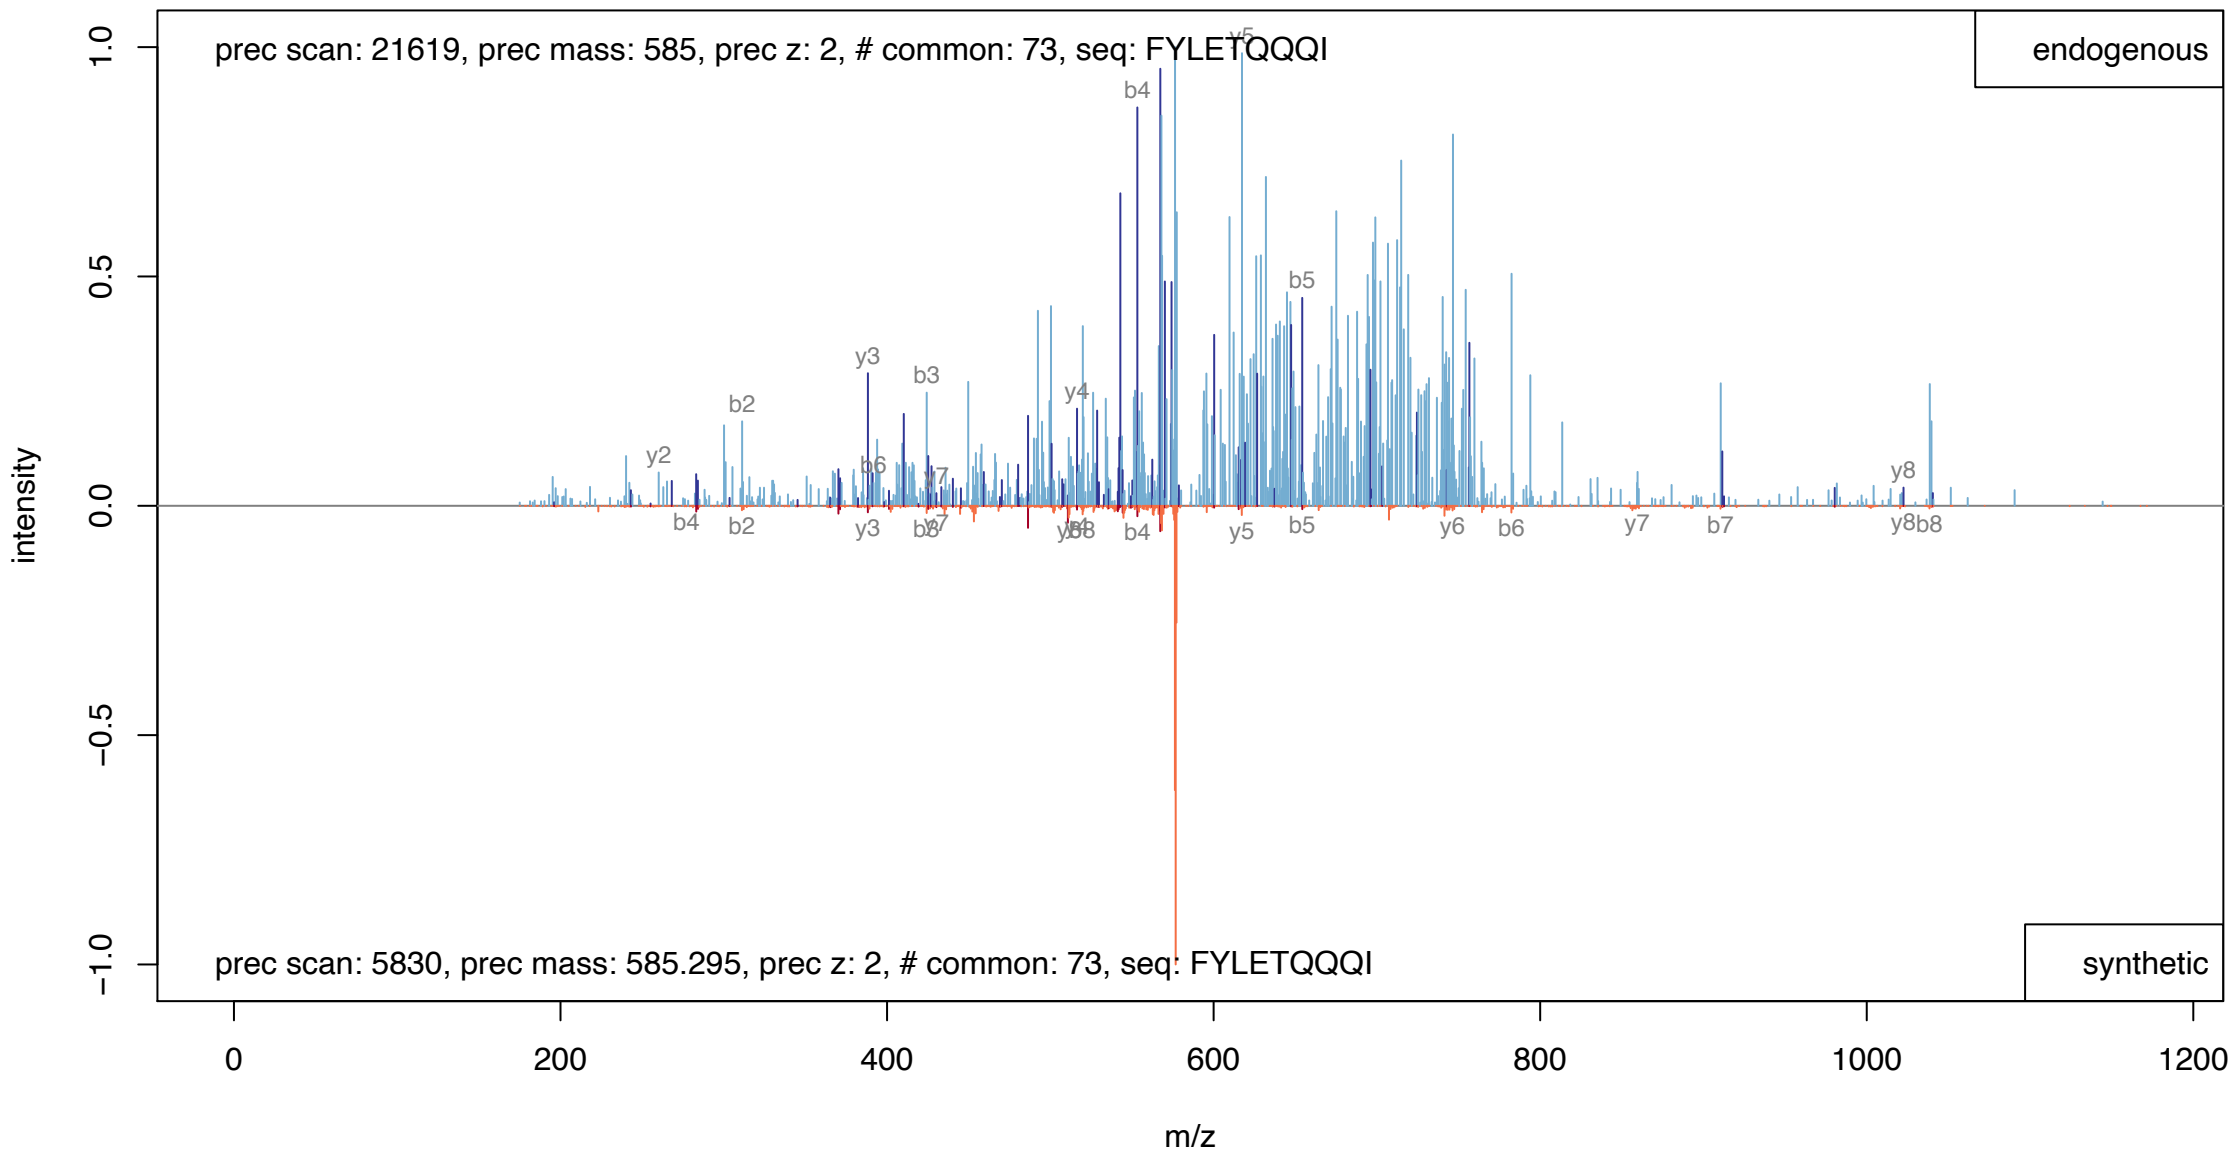

Endogenous: PrecursorError(ppm): -2.49 DeNovoScore: 76 MSGFScore: 41 SpecEValue: 1.43E-07 Eval: 5.90E-05  
Synthetic: PrecursorError(ppm): 0.34 DeNovoScore: 96 MSGFScore: 96 SpecEValue: 1.56E-12 Eval: 6.47E-10

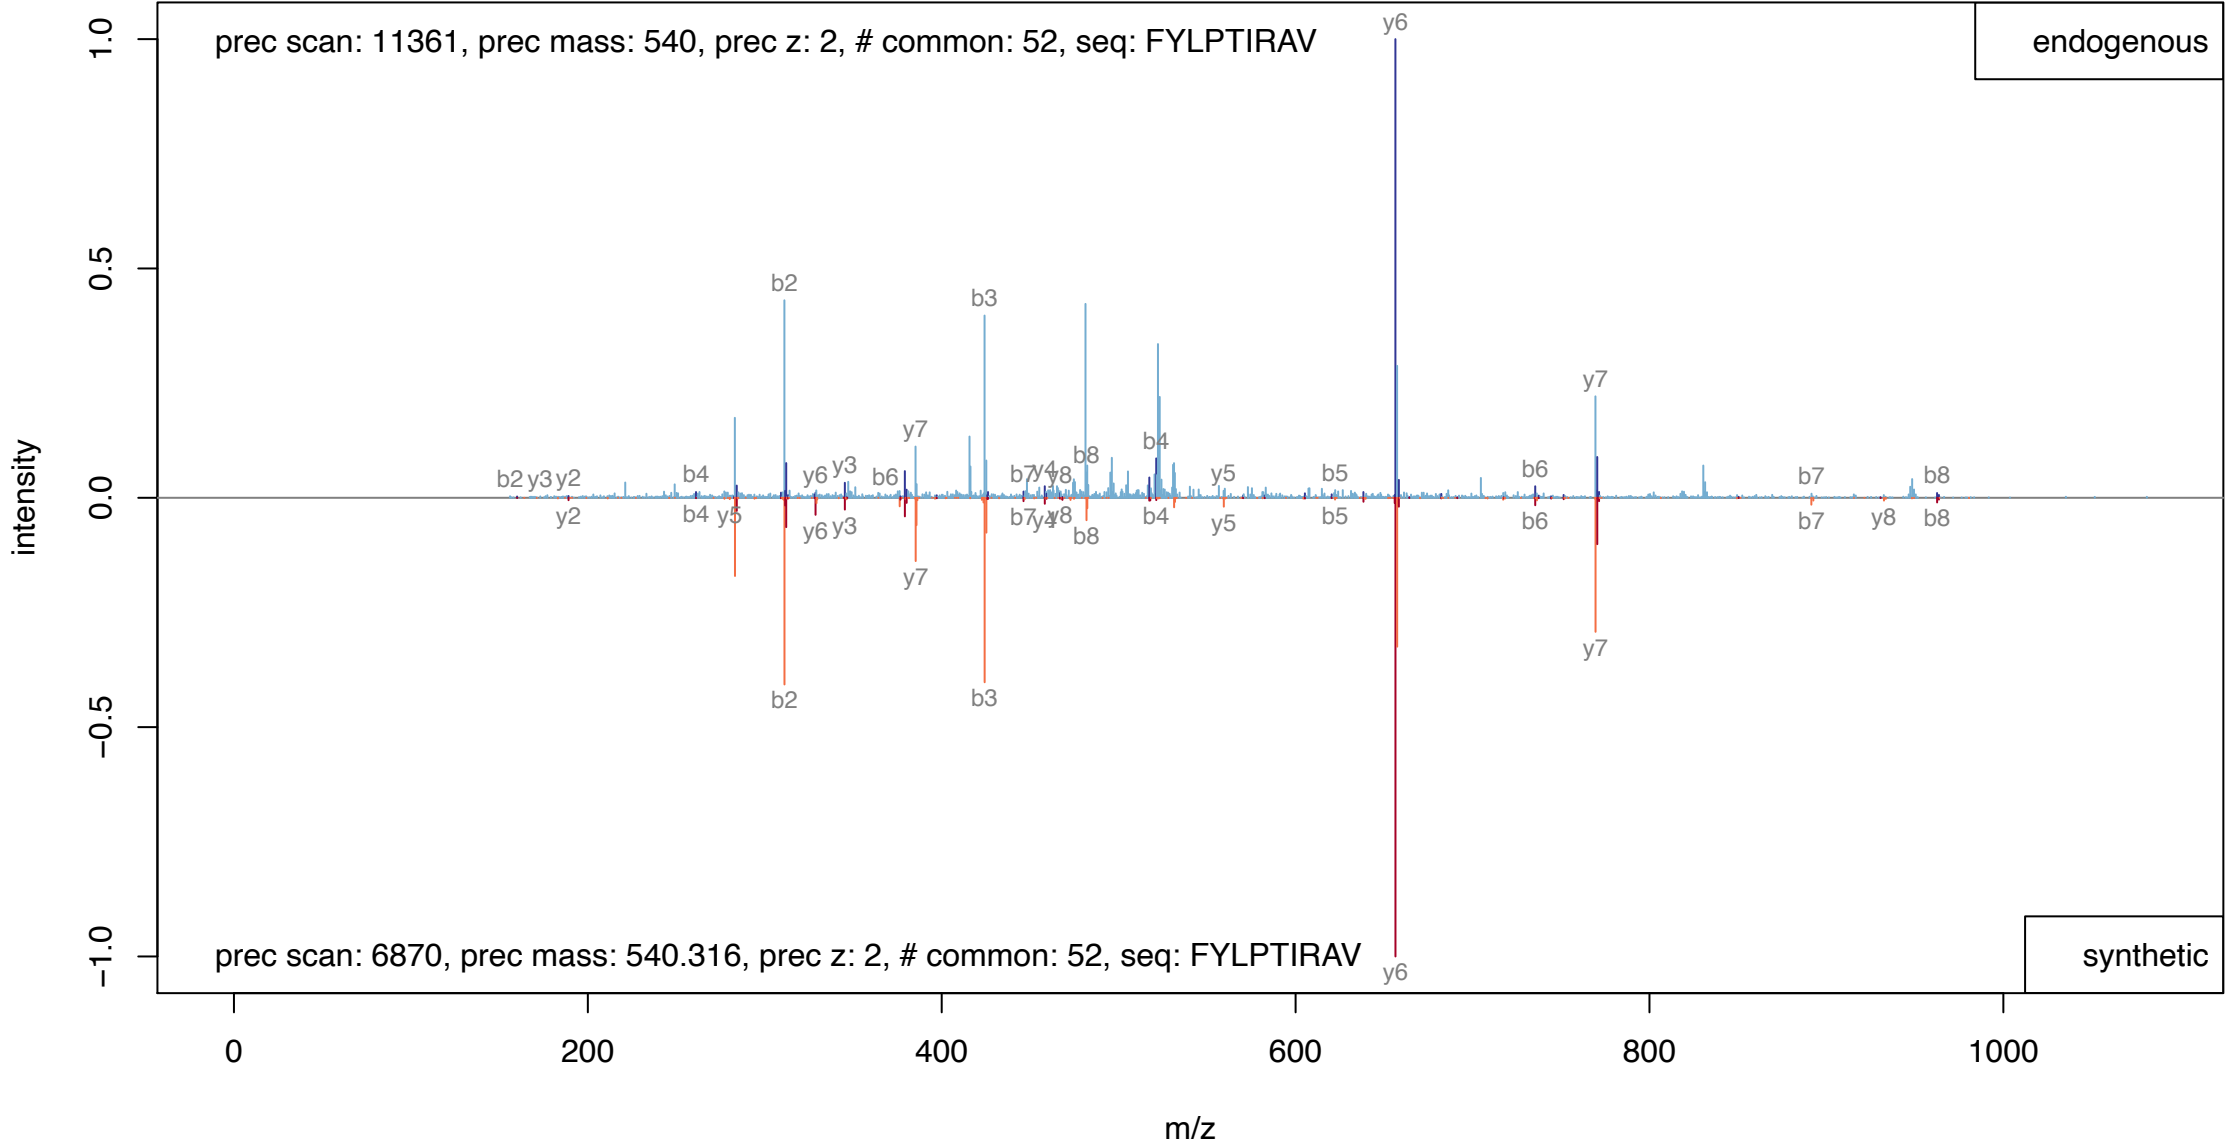

Endogenous: PrecursorError(ppm): -7.19 DeNovoScore: 43 MSGFScore: 27 SpecEValue: 3.58E-09 Evalue: 1.48E-06  
Synthetic: PrecursorError(ppm): -1.62 DeNovoScore: 139 MSGFScore: 102 SpecEValue: 8.58E-10 Evalue: 3.55E-07

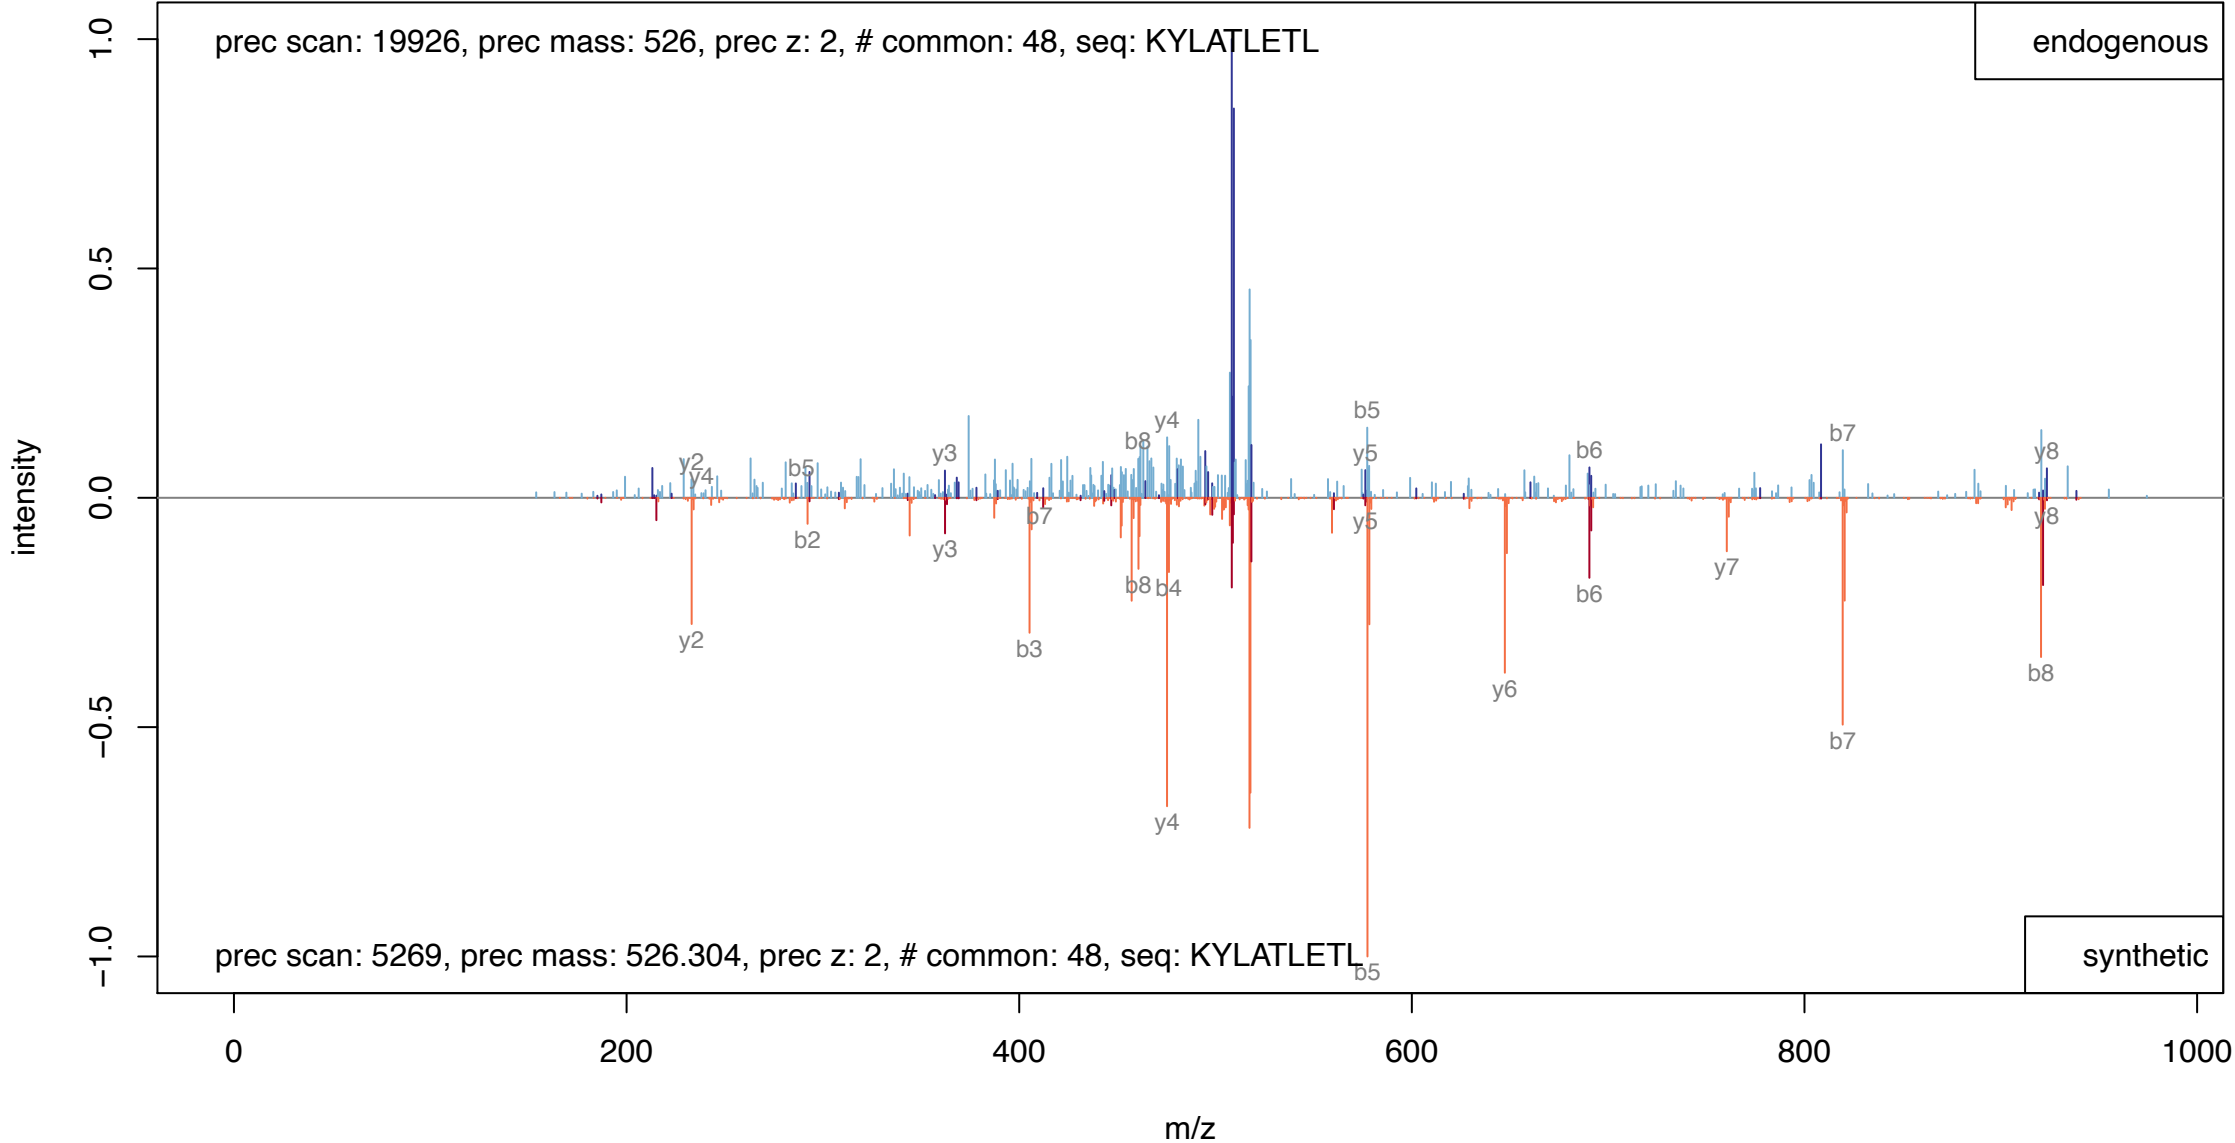



Endogenous: PrecursorError(ppm): -4.41 DeNovoScore: 54 MSGFScore: 7 SpecEValue: 6.68E-07 Evalue: 2.76E-04  
Synthetic: PrecursorError(ppm): 0.18 DeNovoScore: 114 MSGFScore: 71 SpecEValue: 6.77E-10 Evalue: 2.80E-07

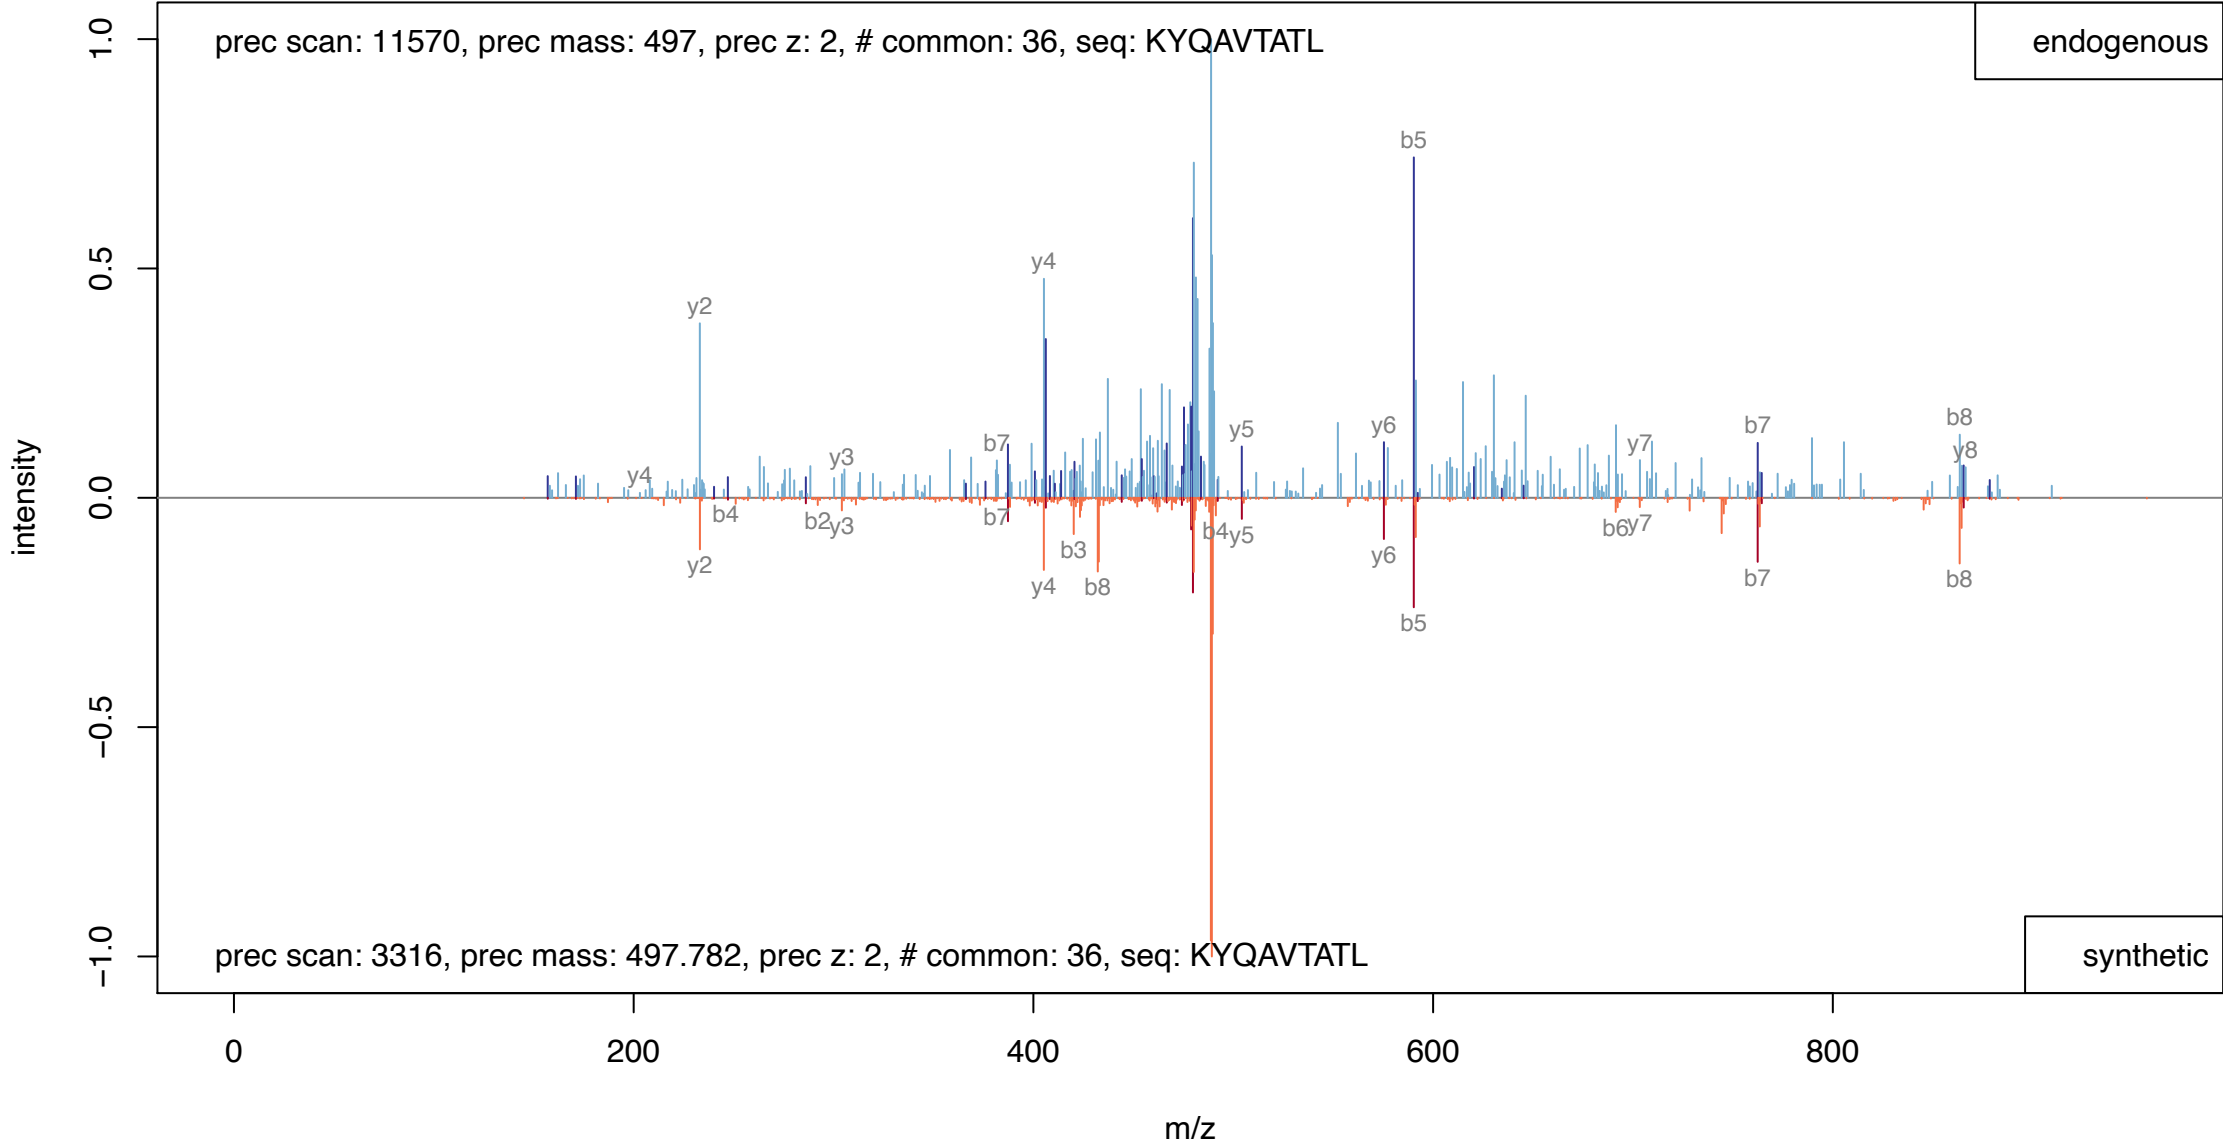

Endogenous: PrecursorError(ppm): -5.54 DeNovoScore: 95 MSGFScore: 19 SpecEValue: 1.55E-05 EvalValue: 6.40E-03  
Synthetic: PrecursorError(ppm): -0.57 DeNovoScore: 119 MSGFScore: 61 SpecEValue: 9.68E-08 EvalValue: 4.01E-05

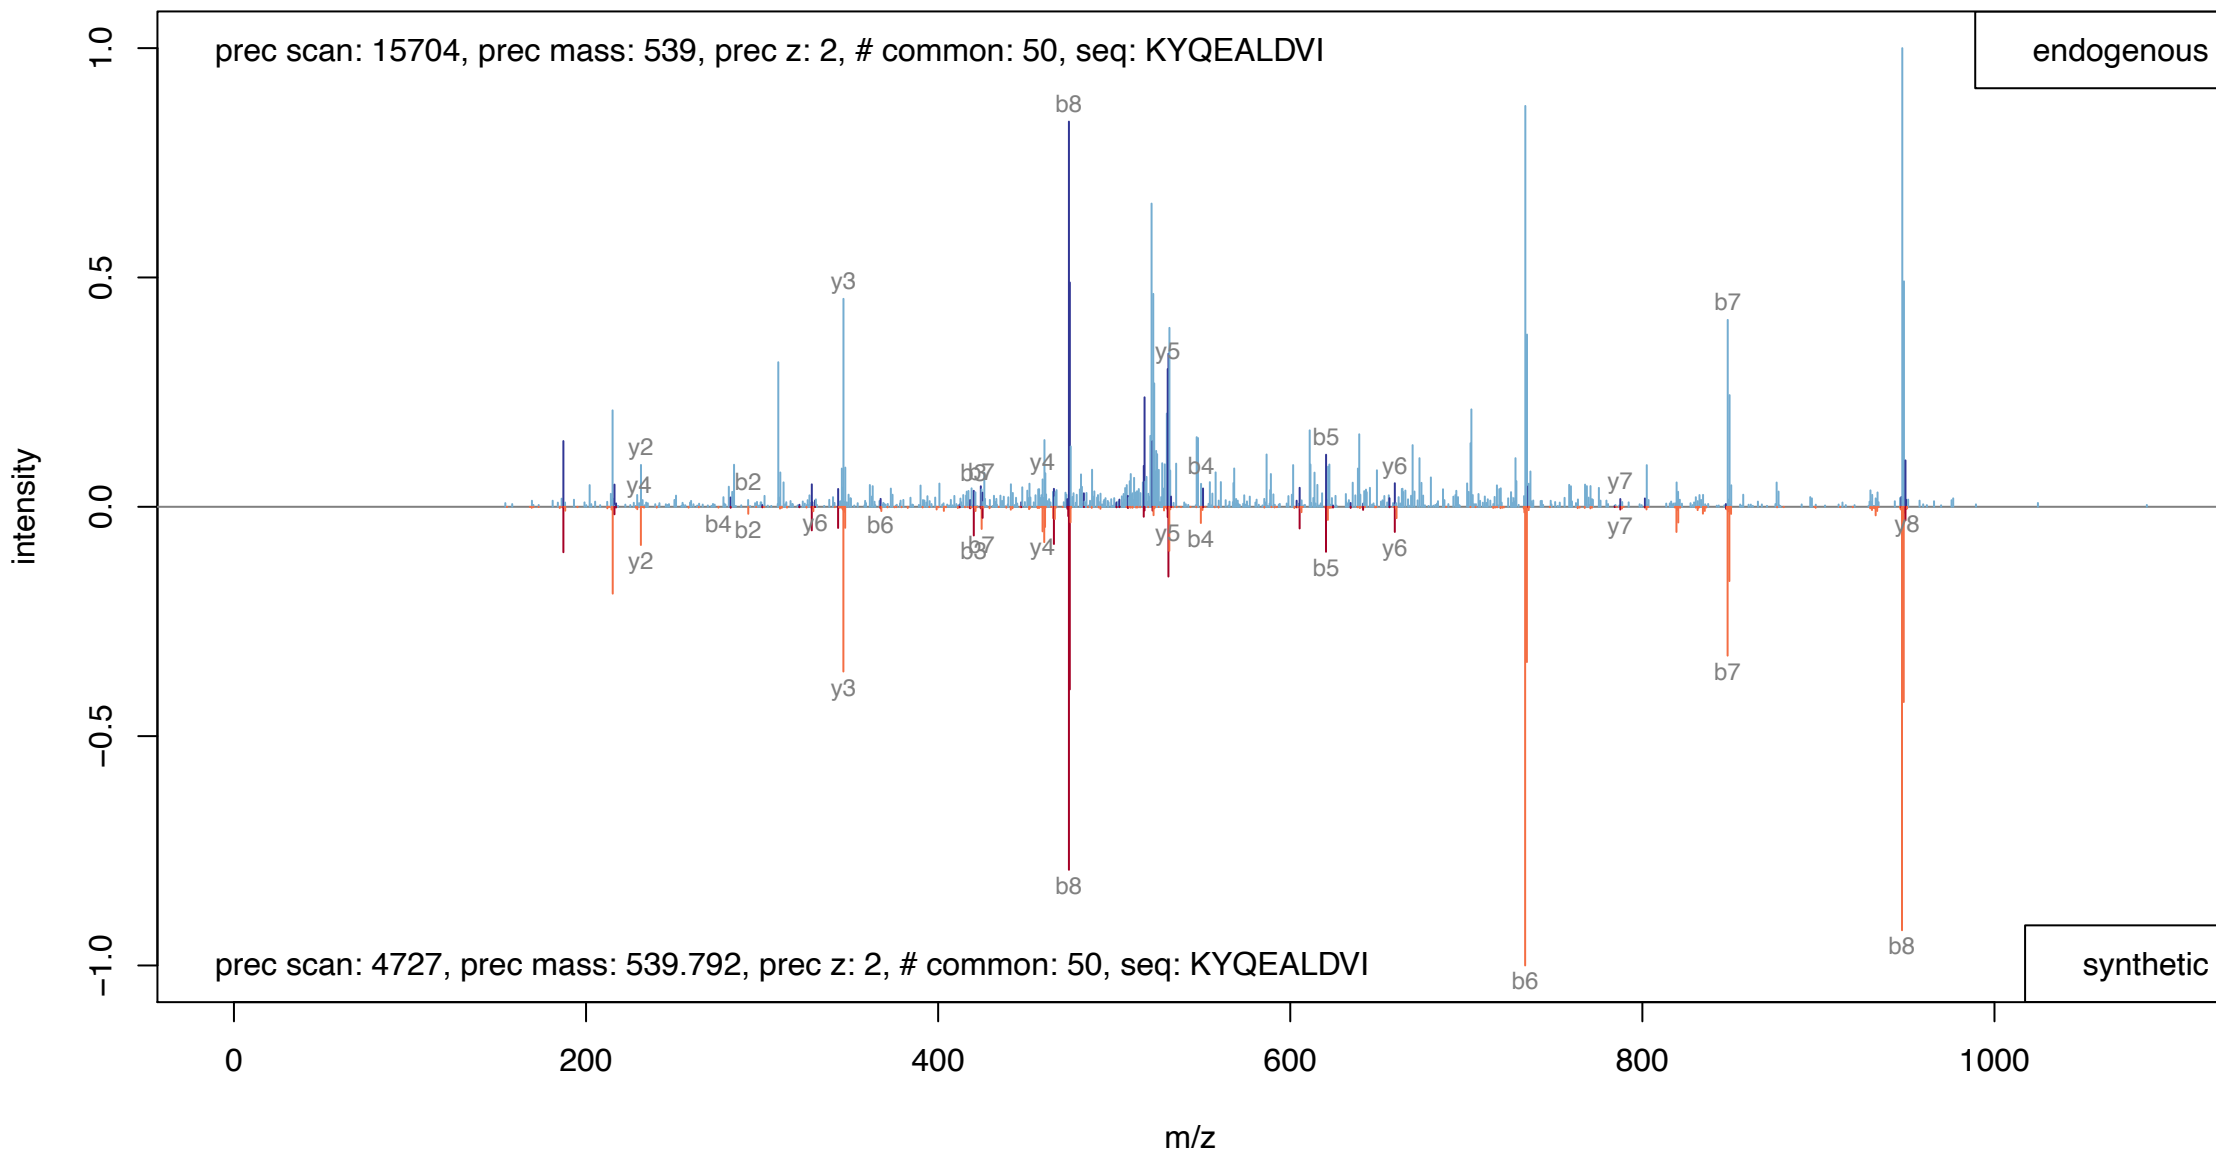

Endogenous: PrecursorError(ppm): -6.06 DeNovoScore: 108 MSGFScore: 57 SpecEValue: 1.29E-07 Eval: 5.35E-05  
Synthetic: PrecursorError(ppm): 0.69 DeNovoScore: 154 MSGFScore: 97 SpecEValue: 2.30E-08 Eval: 9.54E-06

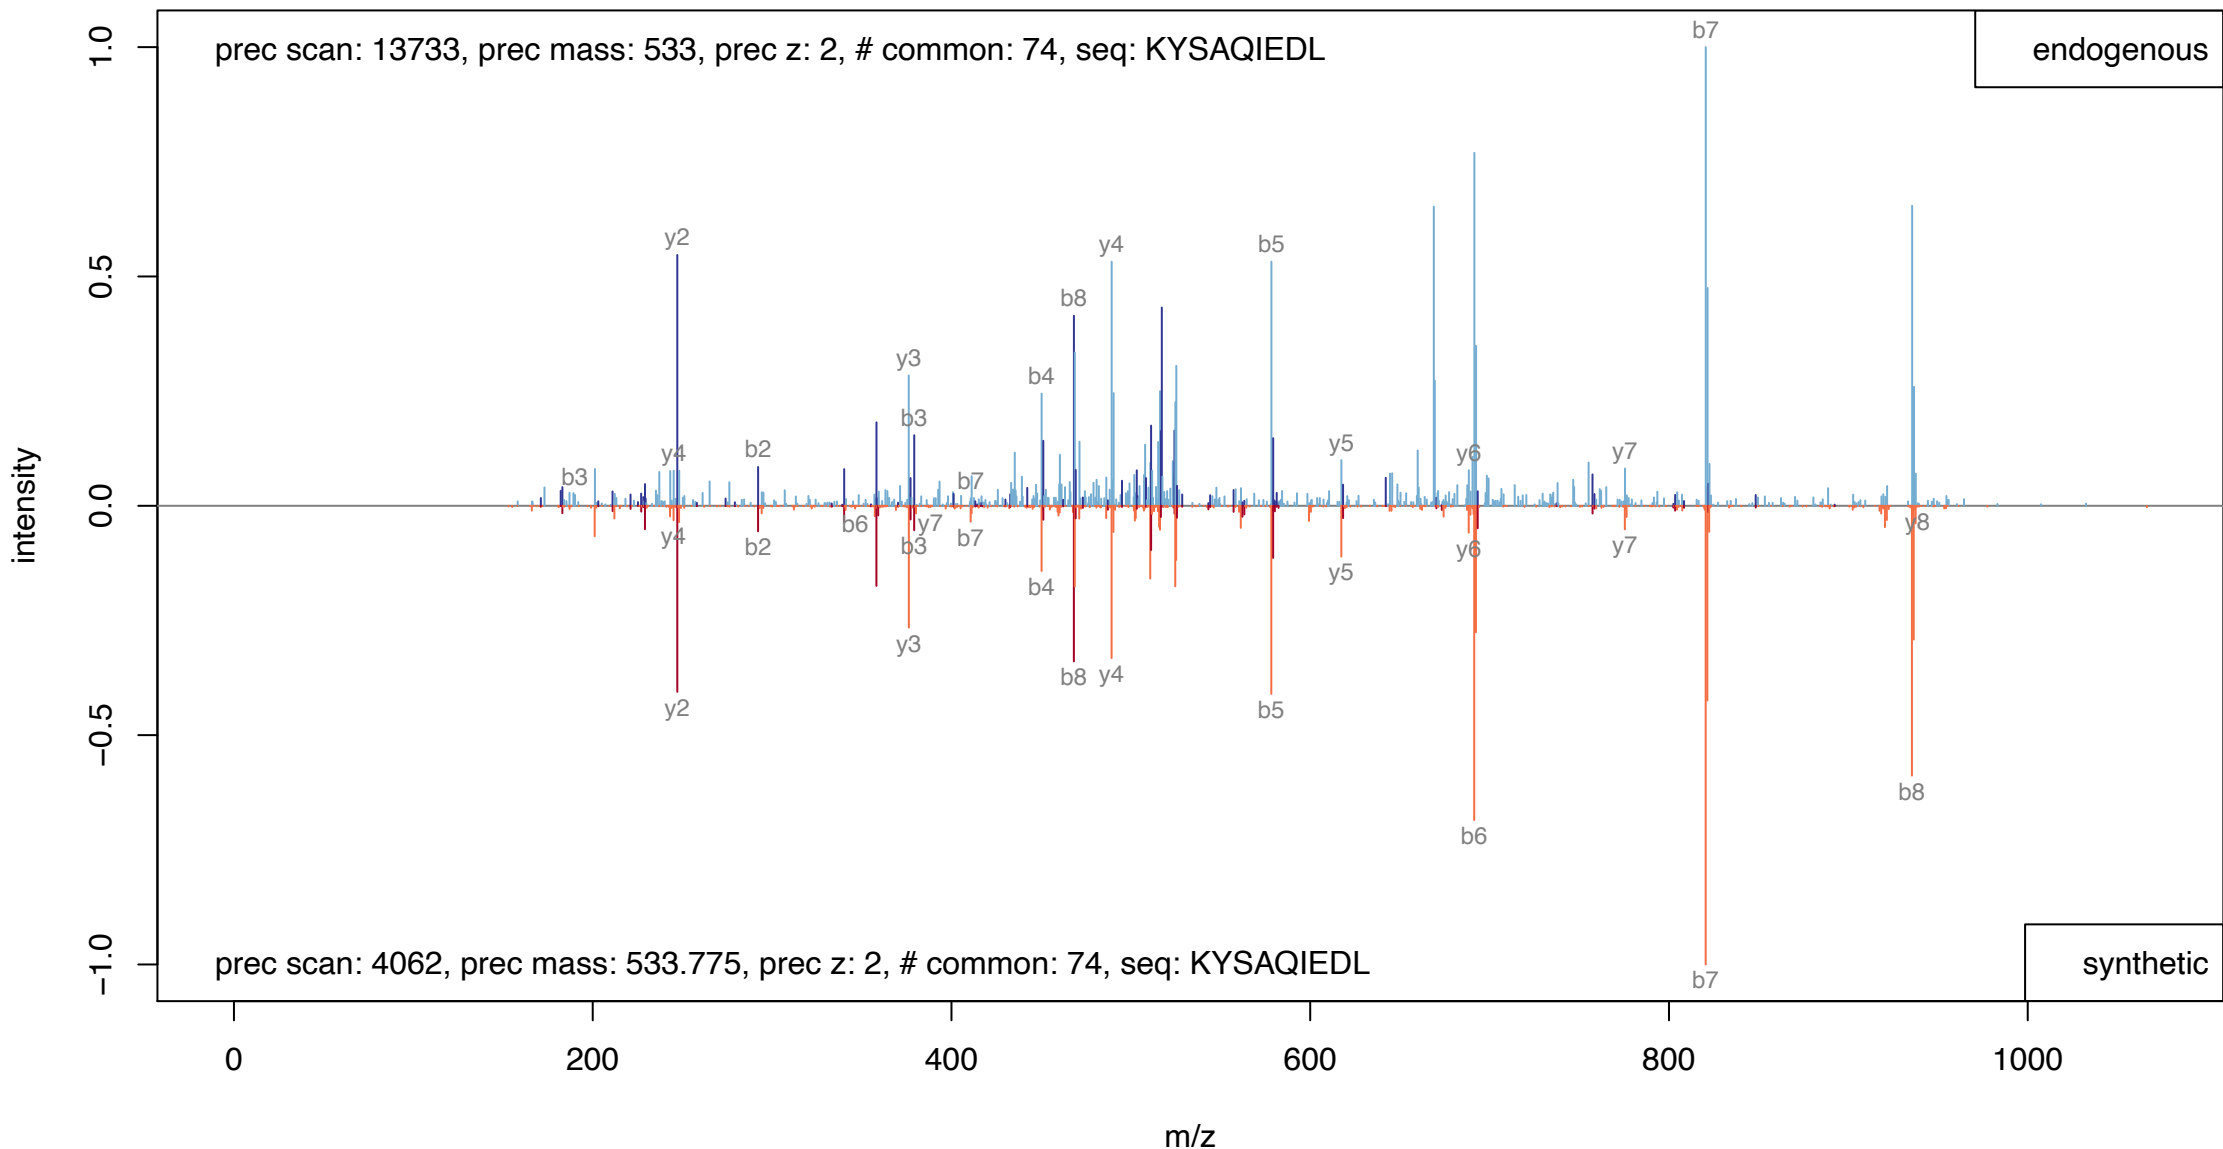

Endogenous: PrecursorError(ppm): -5.20 DeNovoScore: 100 MSGFScore: 99 SpecEValue: 3.13E-12 Eval: 1.29E-09  
Synthetic: PrecursorError(ppm): -0.34 DeNovoScore: 94 MSGFScore: 94 SpecEValue: 1.64E-12 Eval: 6.79E-10

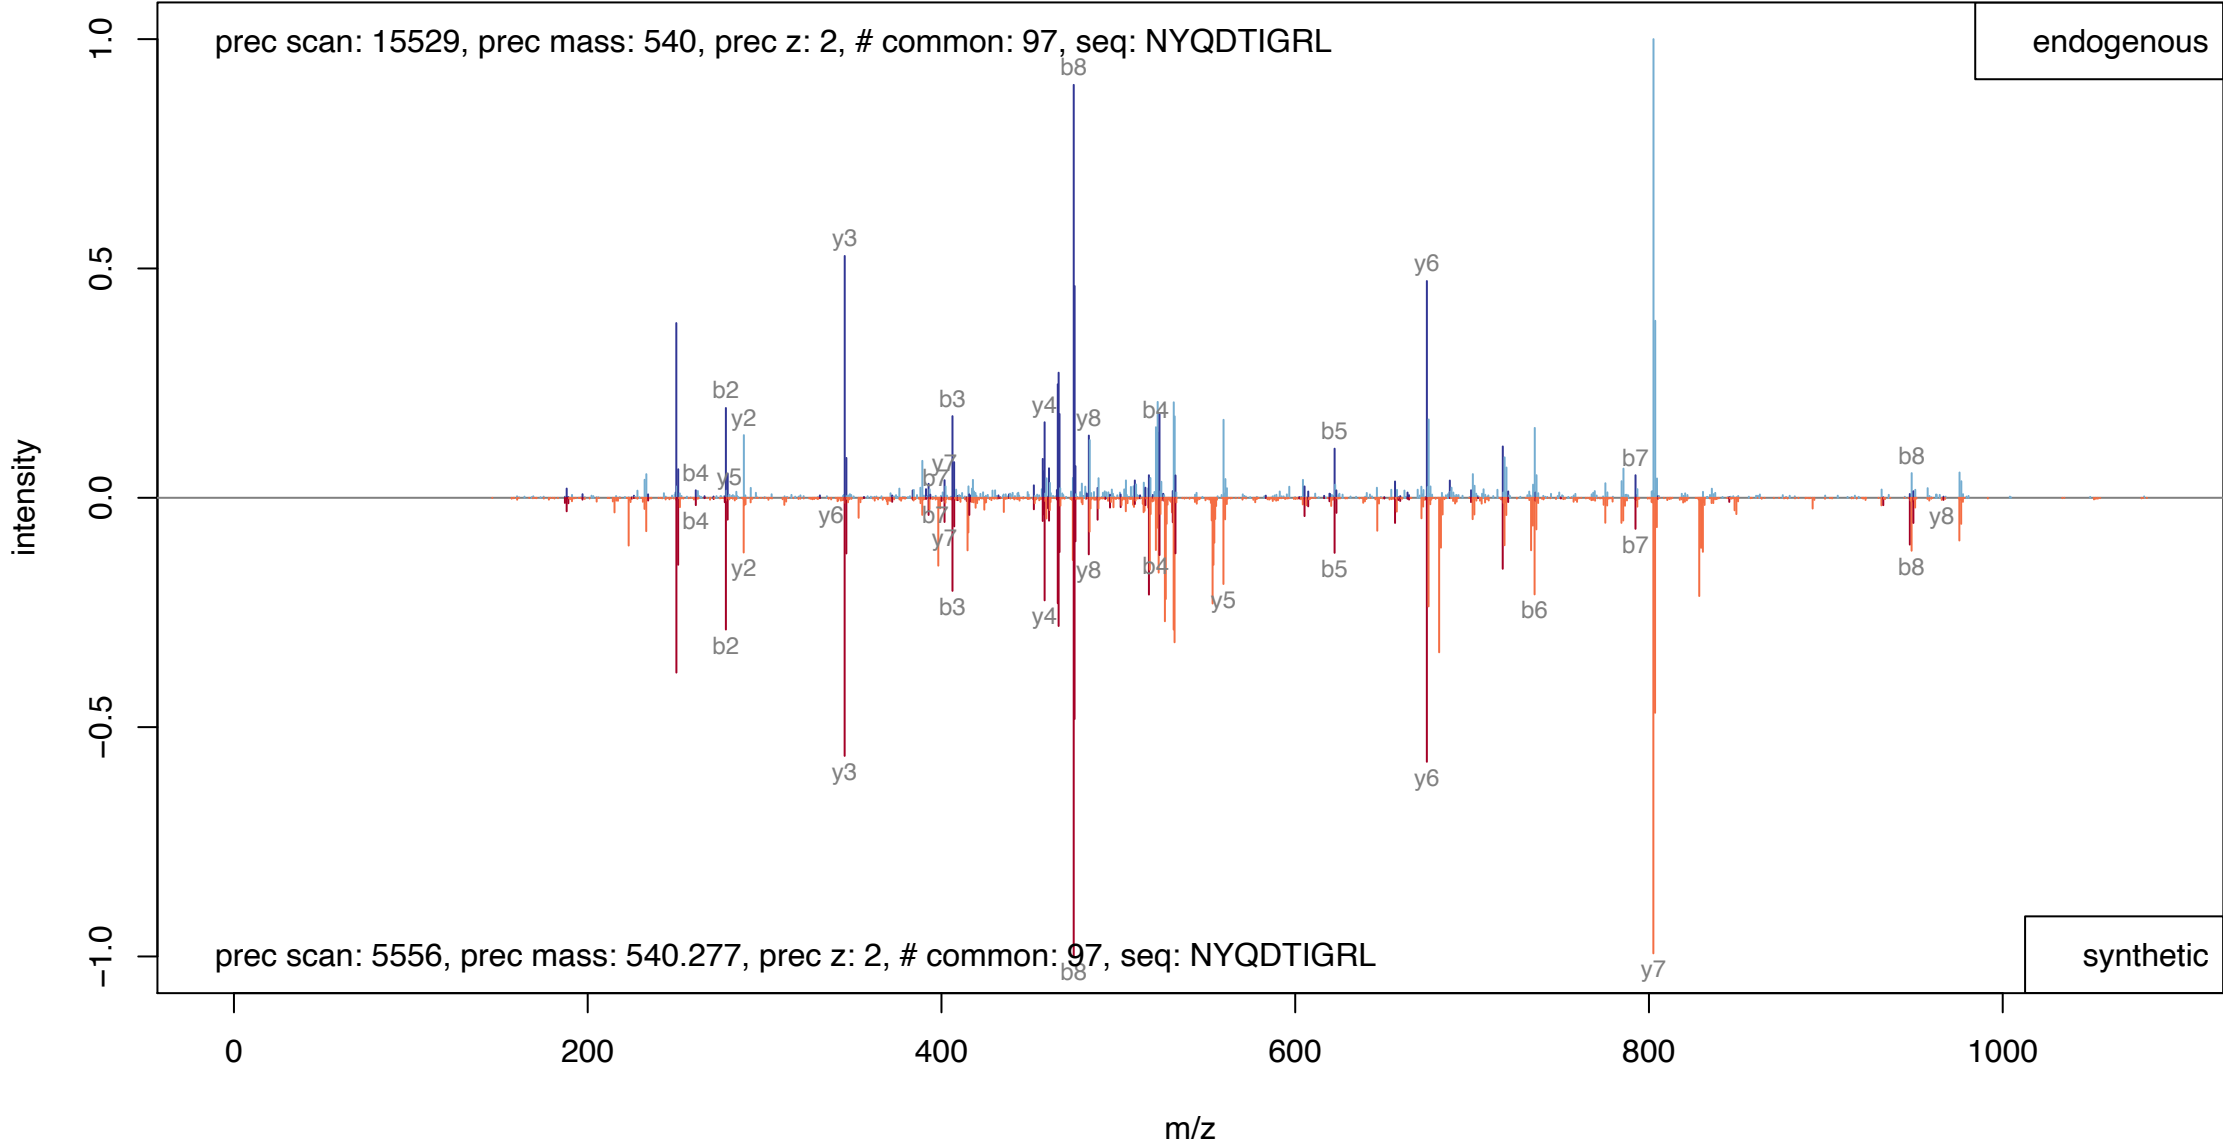

Endogenous: PrecursorError(ppm): -5.00 DeNovoScore: 98 MSGFScore: 67 SpecEValue: 1.93E-09 Evalue: 7.99E-07  
Synthetic: PrecursorError(ppm): -0.83 DeNovoScore: 99 MSGFScore: 80 SpecEValue: 1.72E-10 Evalue: 7.10E-08

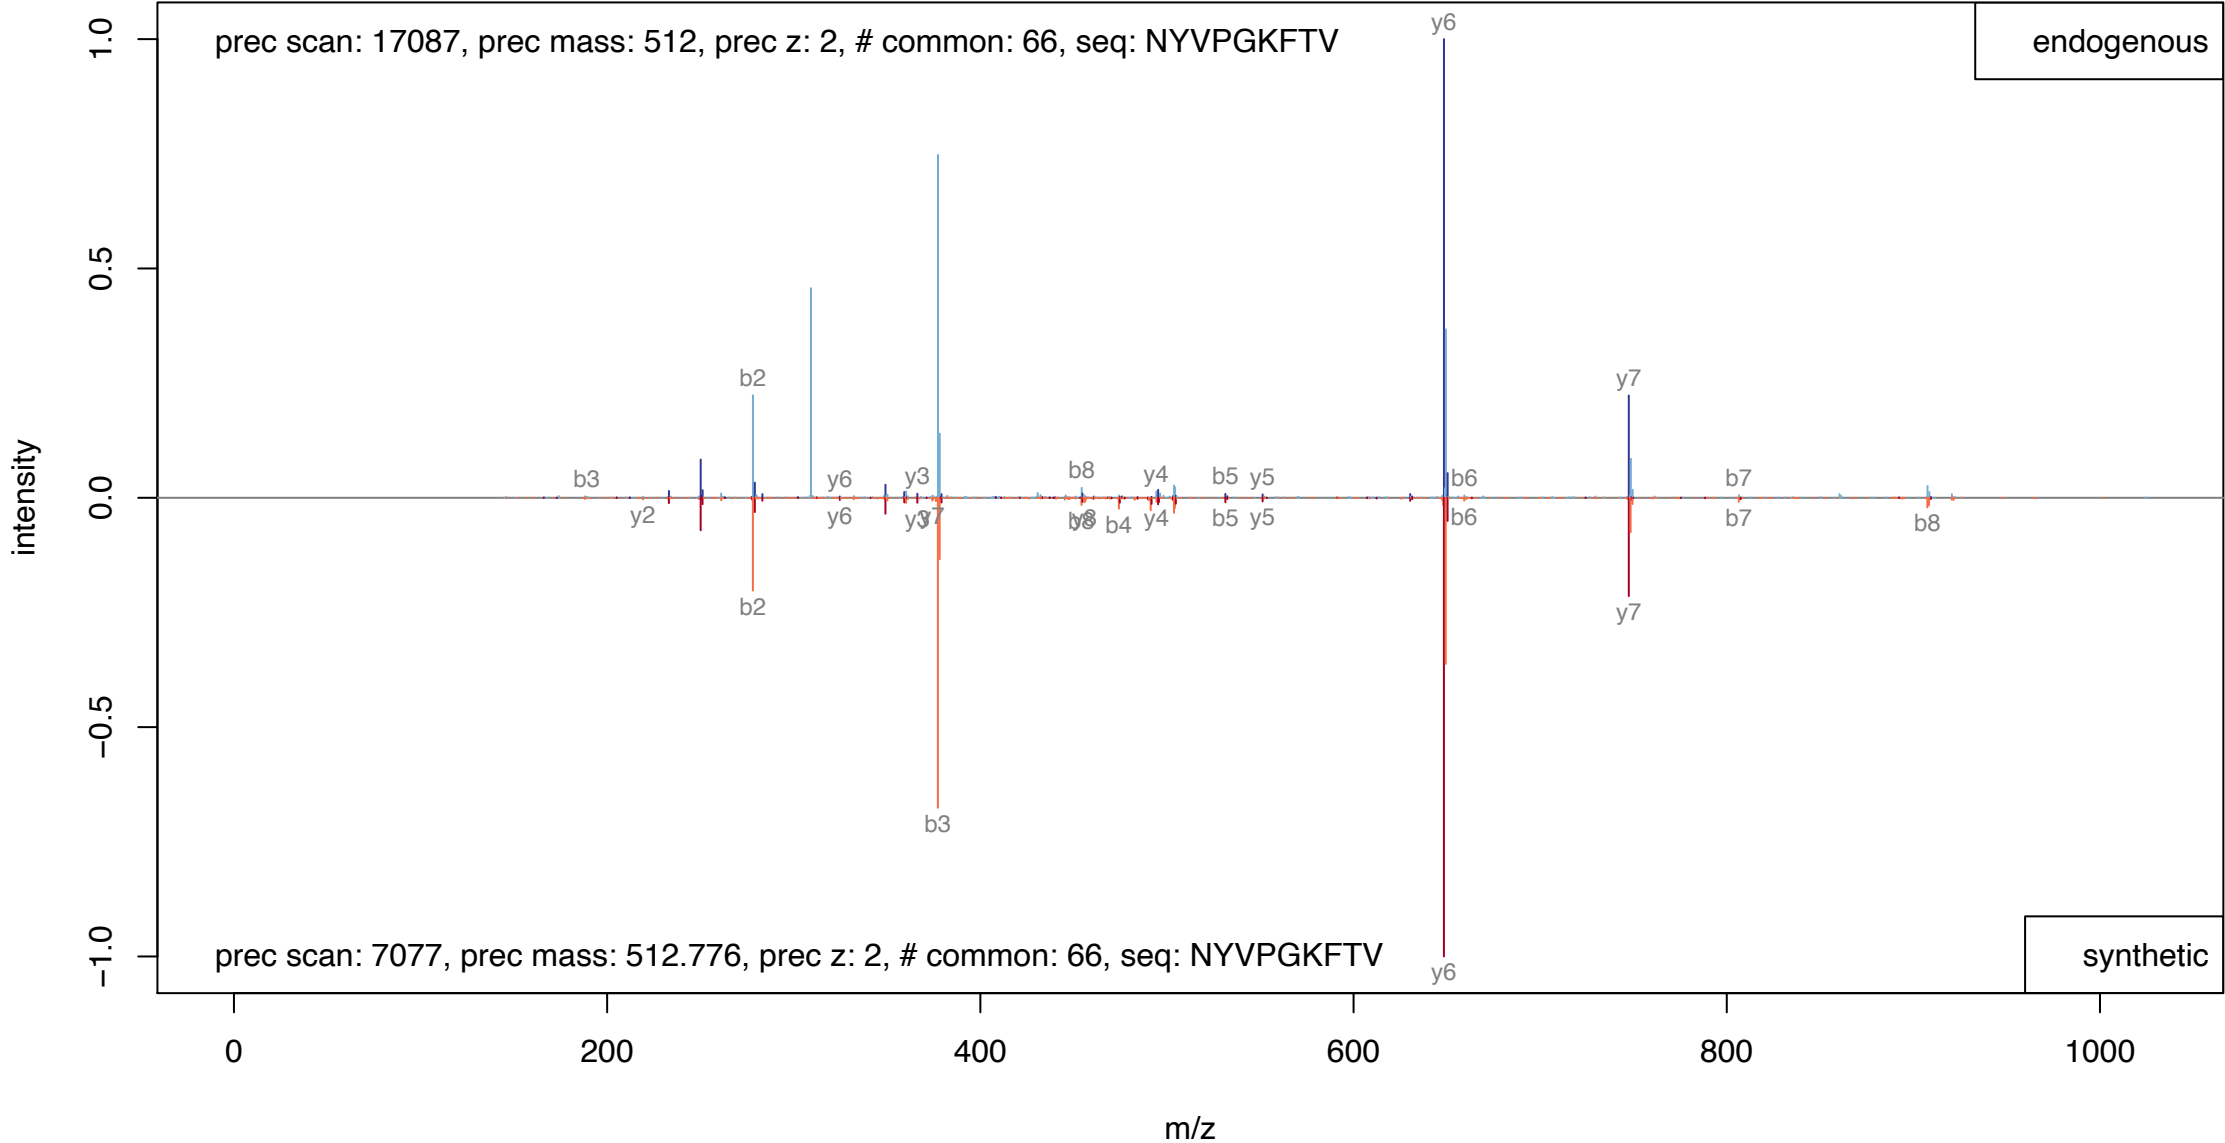

Endogenous: PrecursorError(ppm): -5.60 DeNovoScore: 87 MSGFScore: 43 SpecEValue: 8.31E-09 Eval: 3.44E-06  
Synthetic: PrecursorError(ppm): -0.18 DeNovoScore: 92 MSGFScore: 51 SpecEValue: 5.49E-10 Eval: 2.27E-07

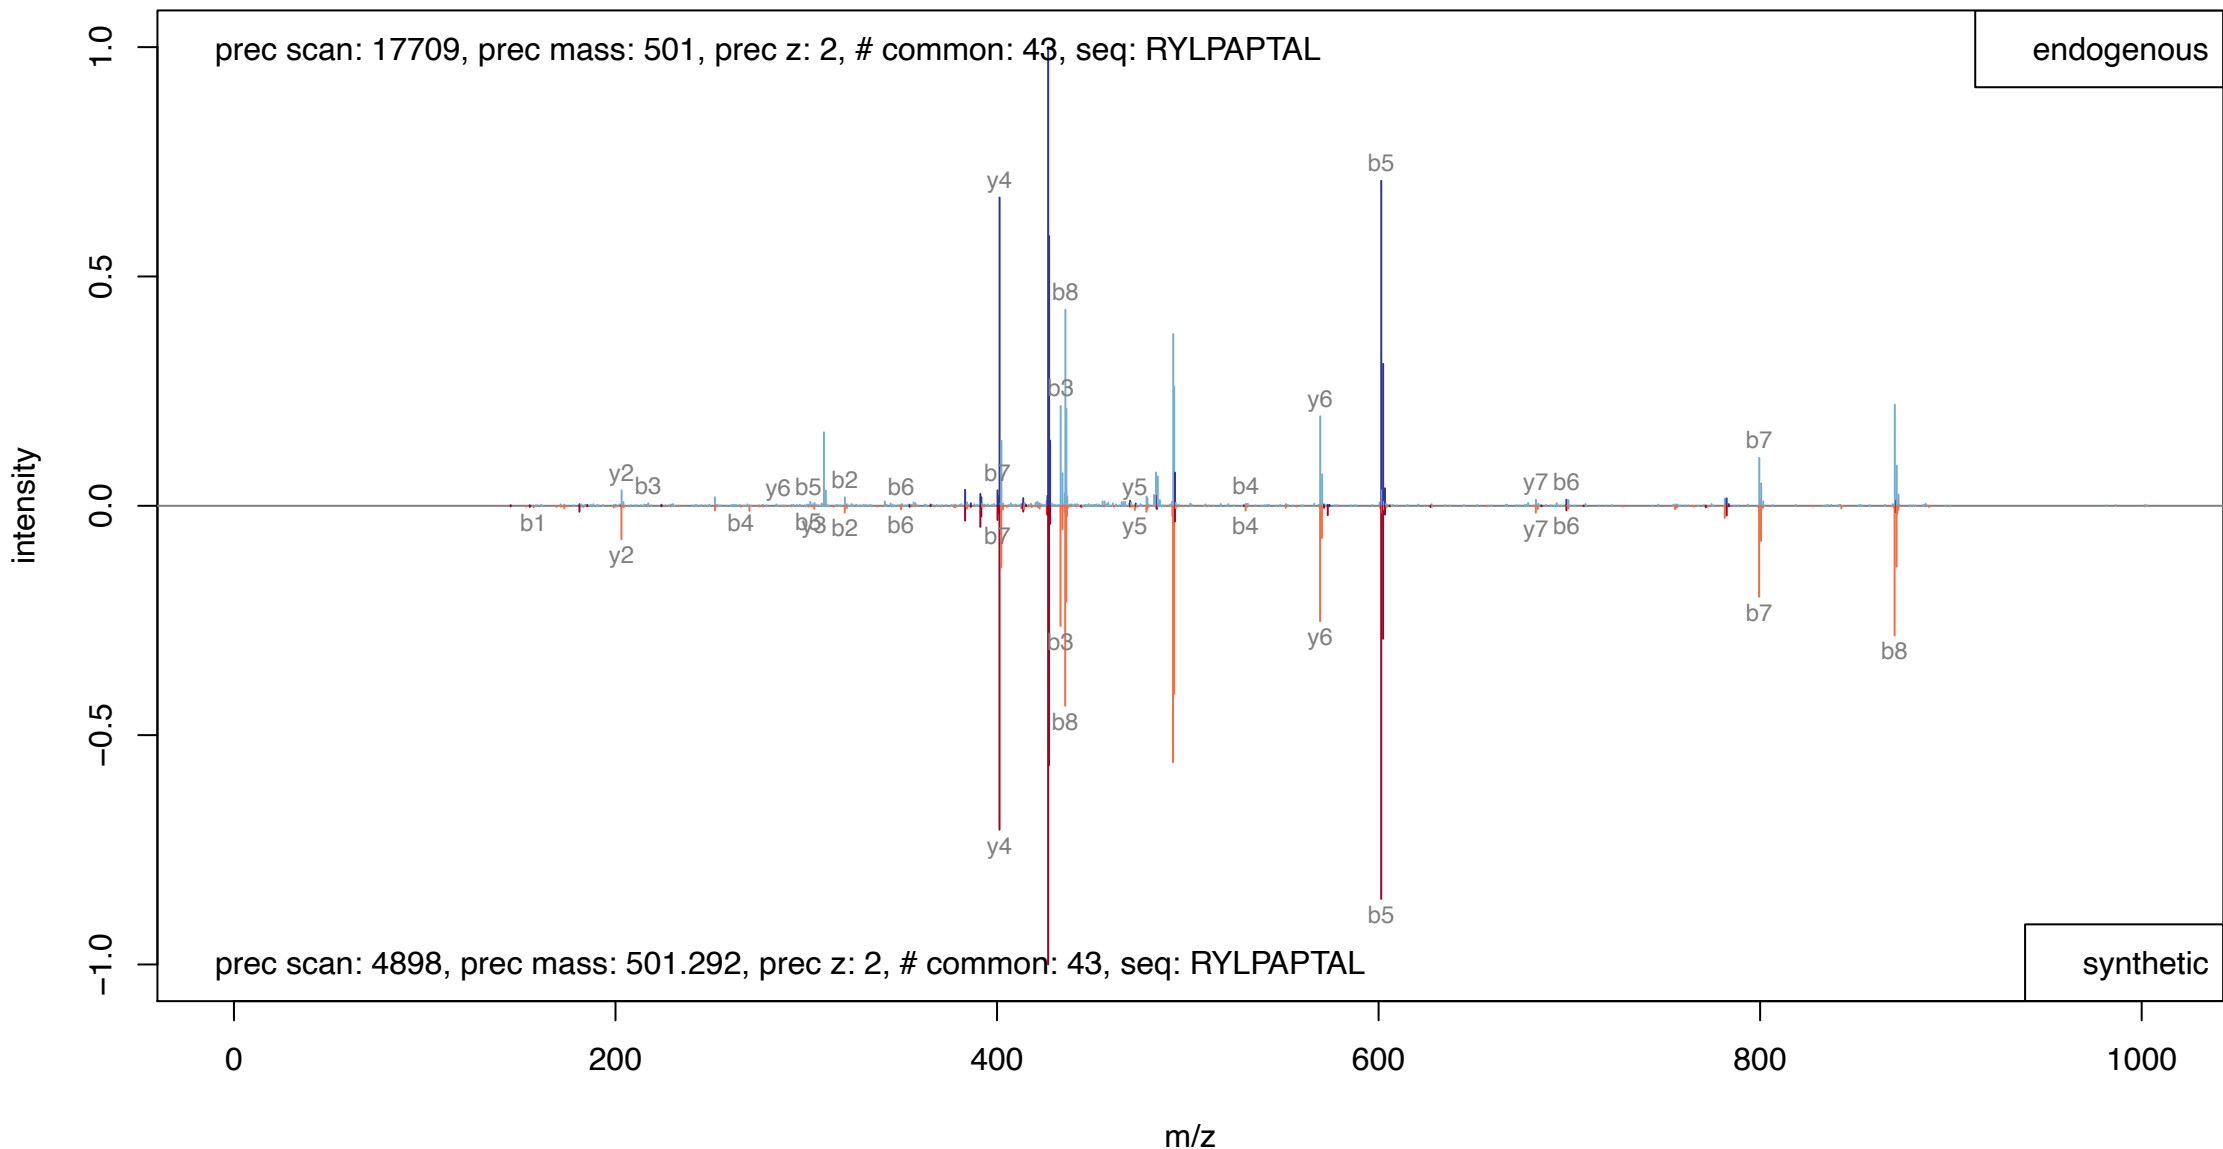

Endogenous: PrecursorError(ppm): -4.83 DeNovoScore: 50 MSGFScore: 15 SpecEValue: 7.59E-08 Eval: 3.14E-05

Synthetic: PrecursorError(ppm): -0.45 DeNovoScore: 120 MSGFScore: 97 SpecEValue: 1.47E-10 Eval: 6.07E-08

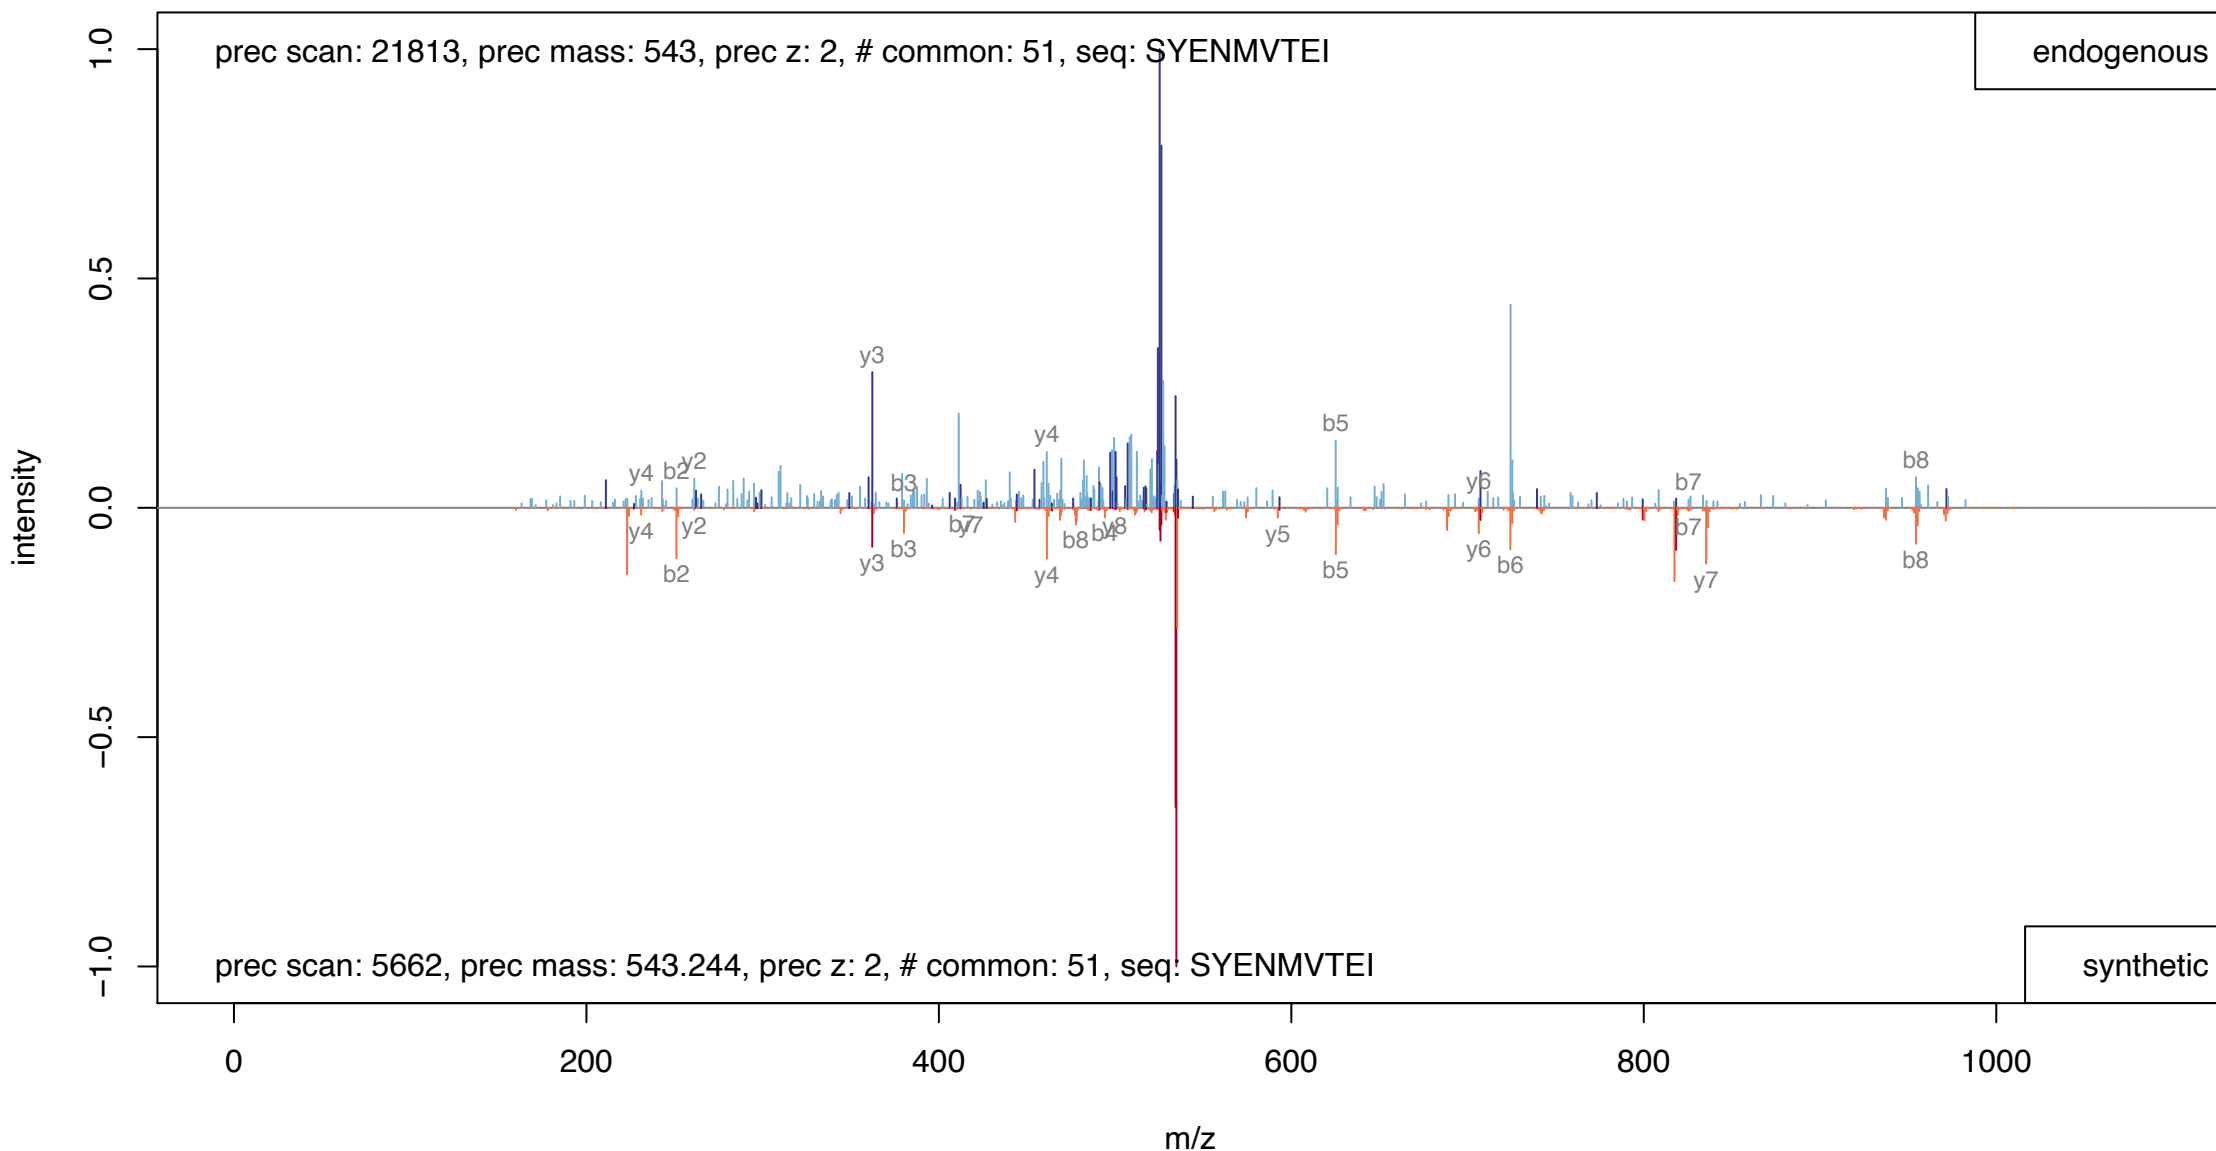

Endogenous: PrecursorError(ppm): -2.09 DeNovoScore: 92 MSGFScore: 75 SpecEValue: 8.87E-10 Evalue: 3.67E-07  
Synthetic: PrecursorError(ppm): -1.54 DeNovoScore: 112 MSGFScore: 107 SpecEValue: 4.69E-12 Evalue: 1.94E-09

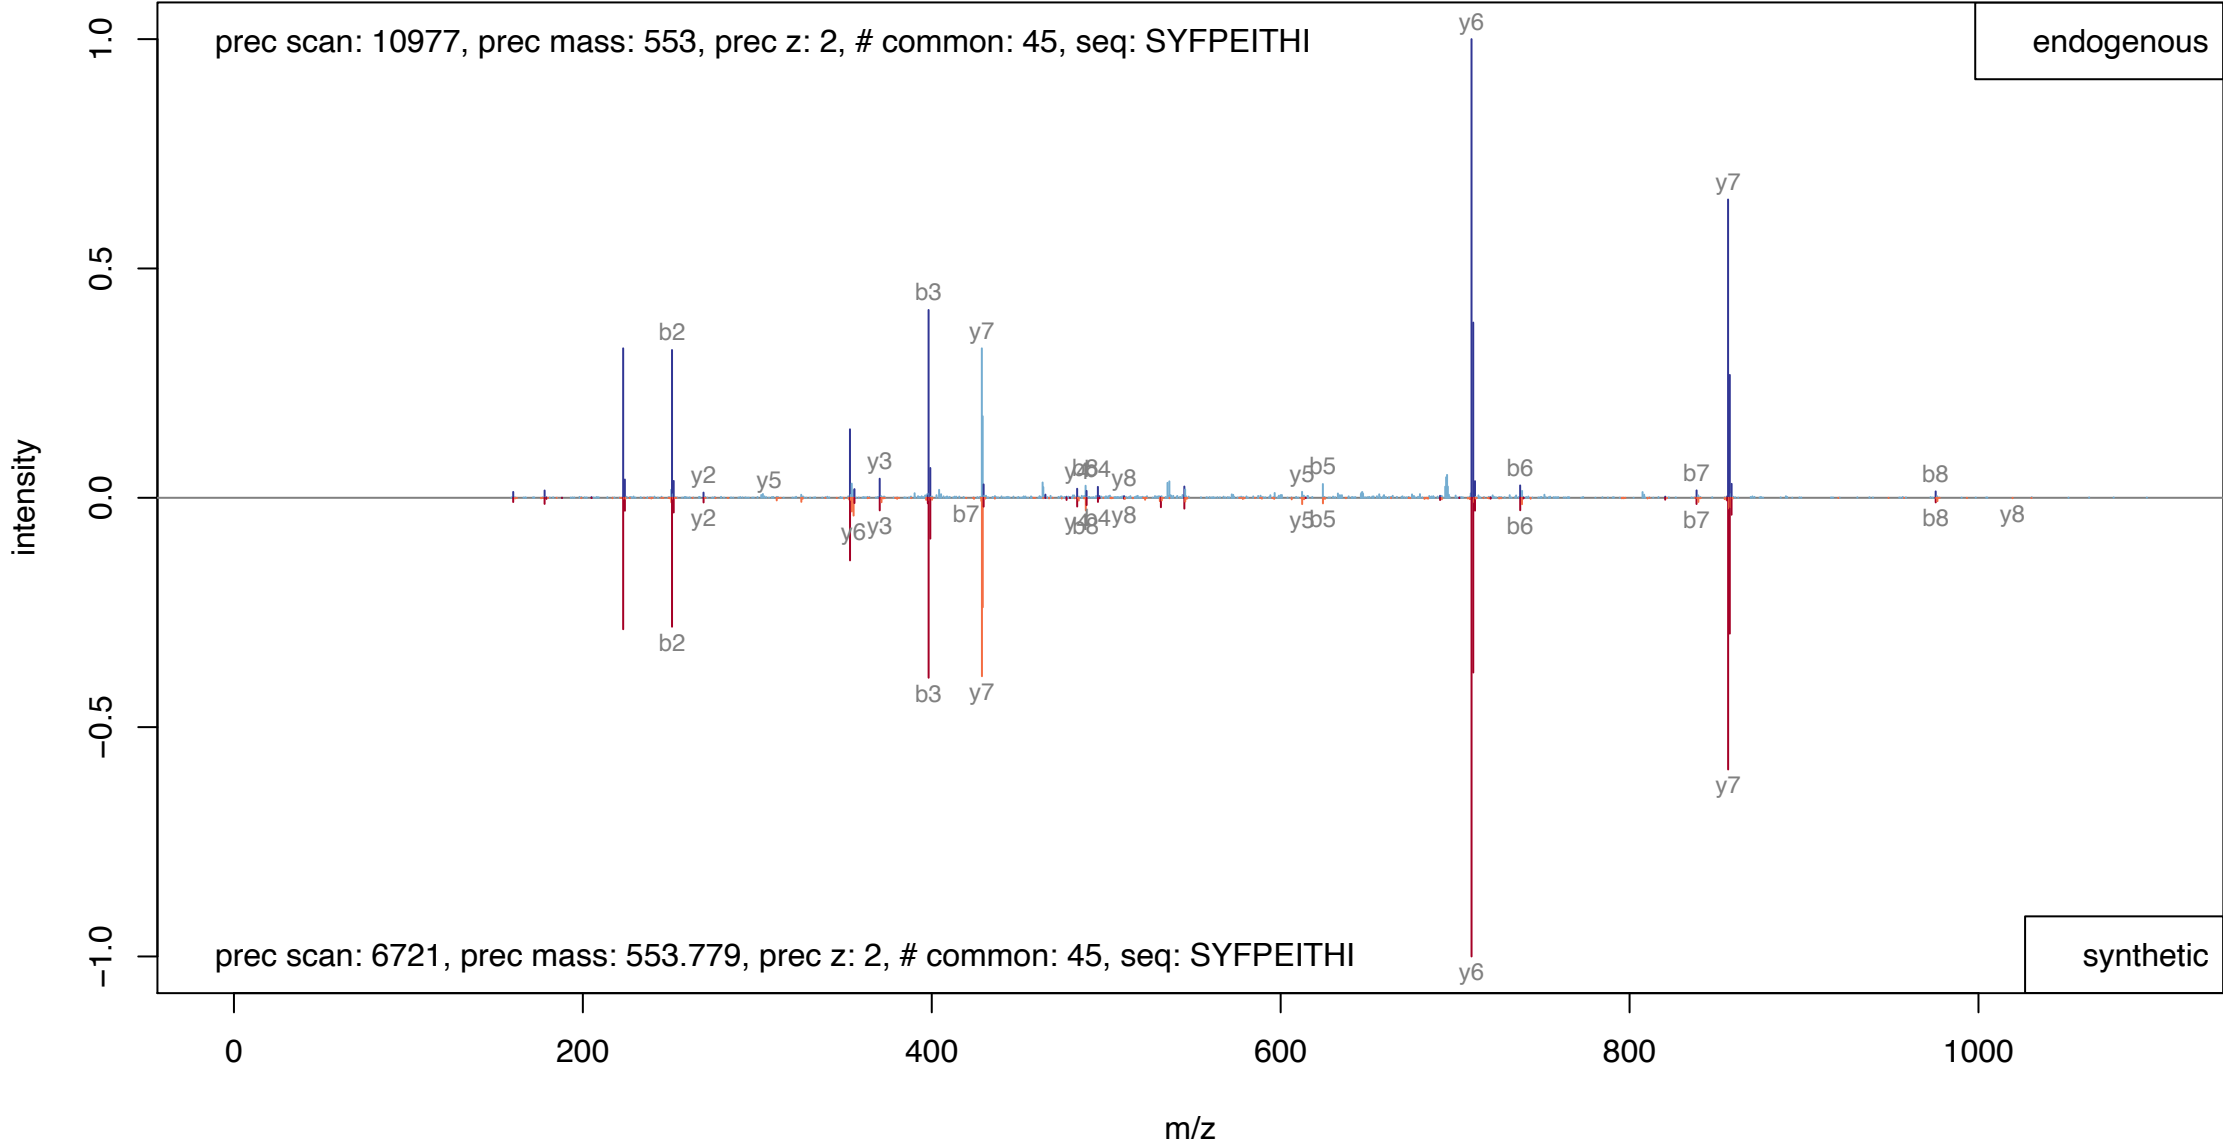



Endogenous: PrecursorError(ppm): -6.31 DeNovoScore: 100 MSGFScore: 34 SpecEValue: 5.20E-07 Eval: 2.15E-04  
Synthetic: PrecursorError(ppm): -0.99 DeNovoScore: 79 MSGFScore: 36 SpecEValue: 9.99E-09 Eval: 4.13E-06

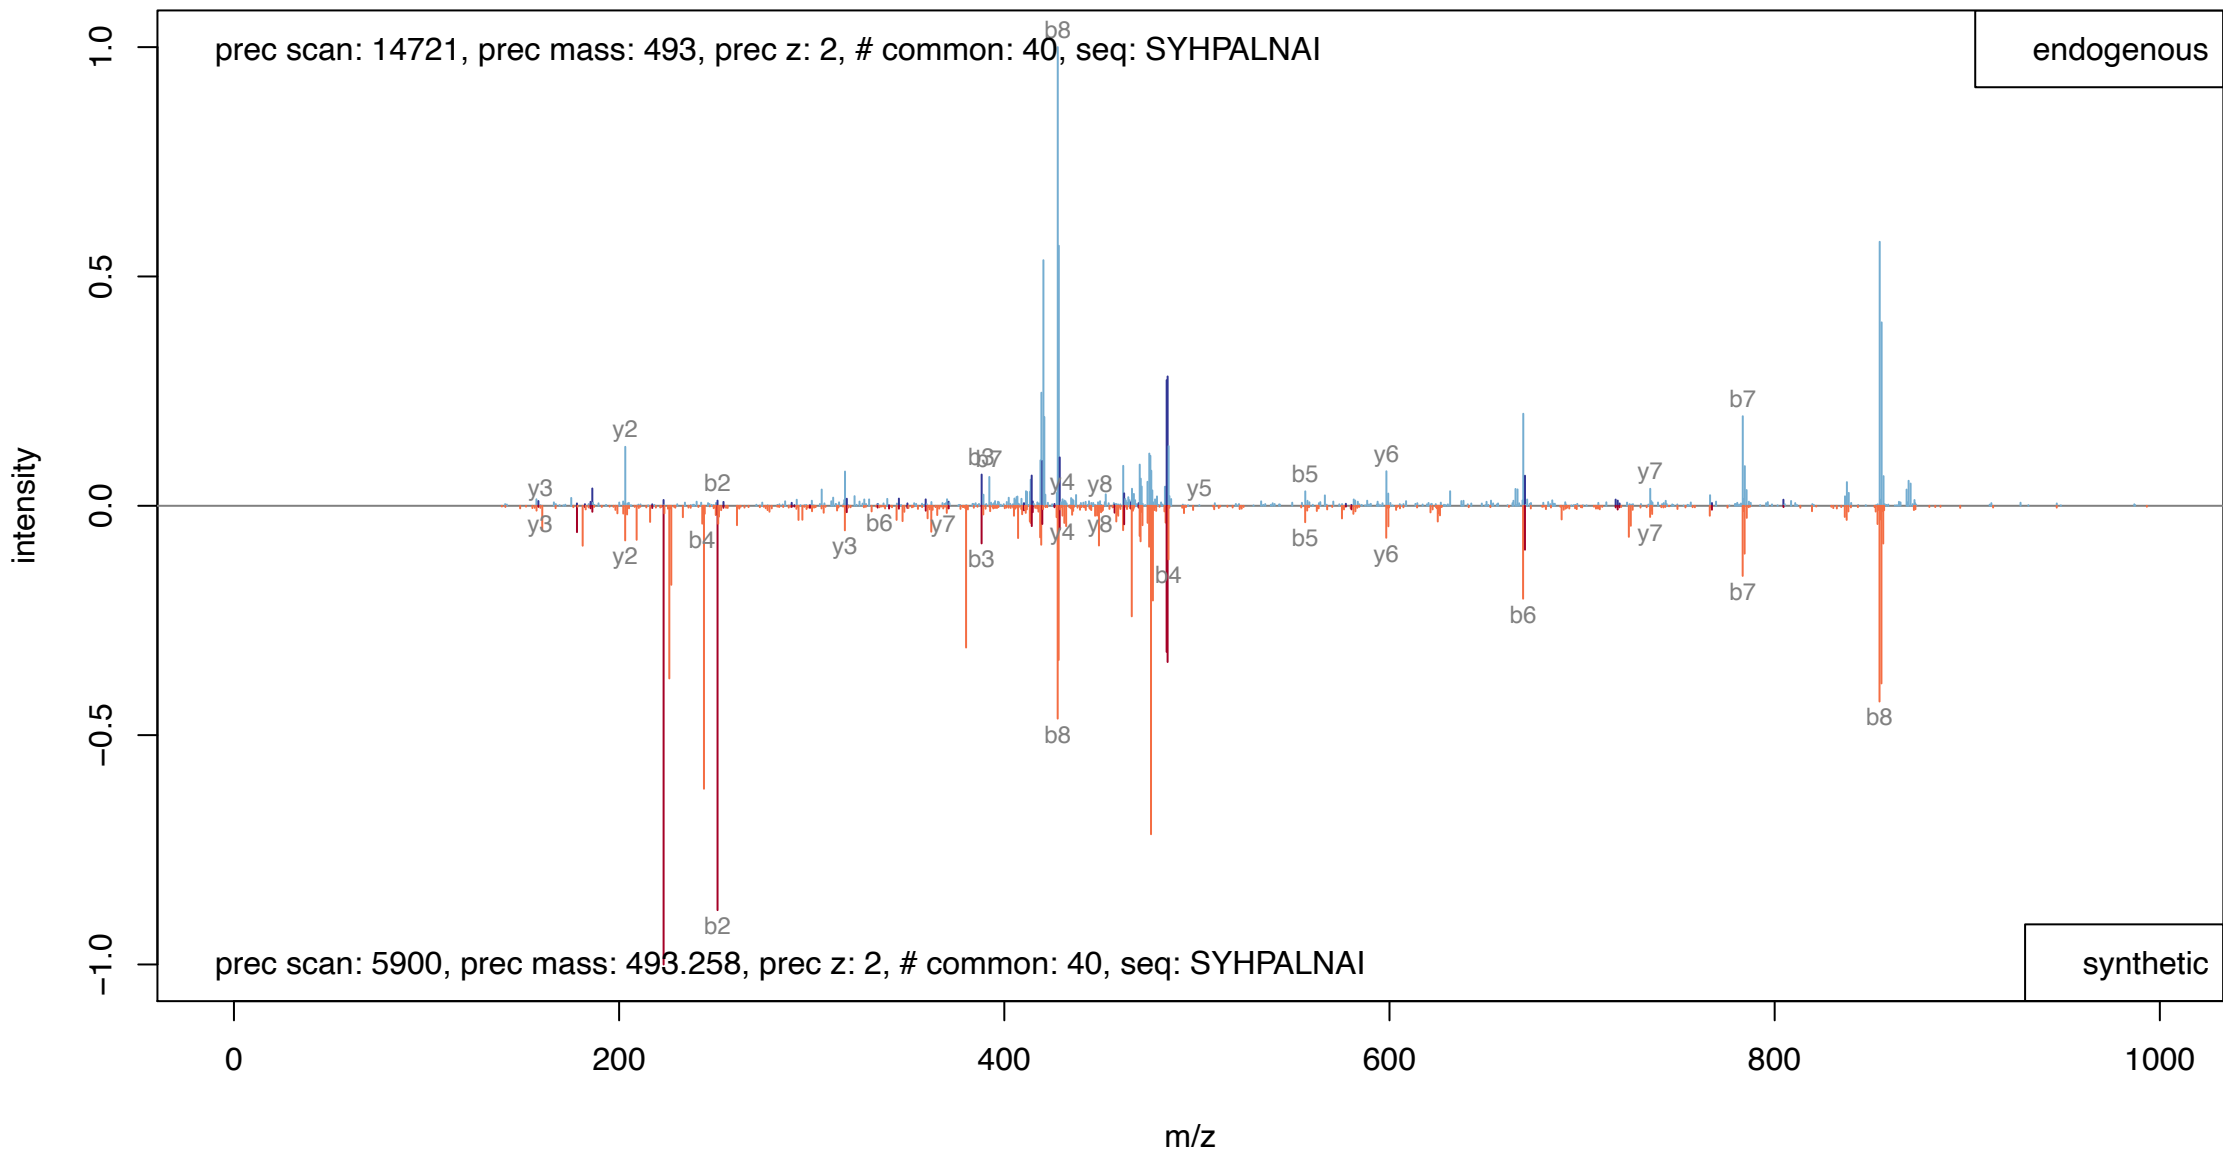

Endogenous: PrecursorError(ppm): -8.01 DeNovoScore: 74 MSGFScore: 28 SpecEValue: 3.56E-07 Evalue: 1.47E-04  
Synthetic: PrecursorError(ppm): -1.21 DeNovoScore: 114 MSGFScore: 73 SpecEValue: 2.84E-09 Evalue: 1.18E-06

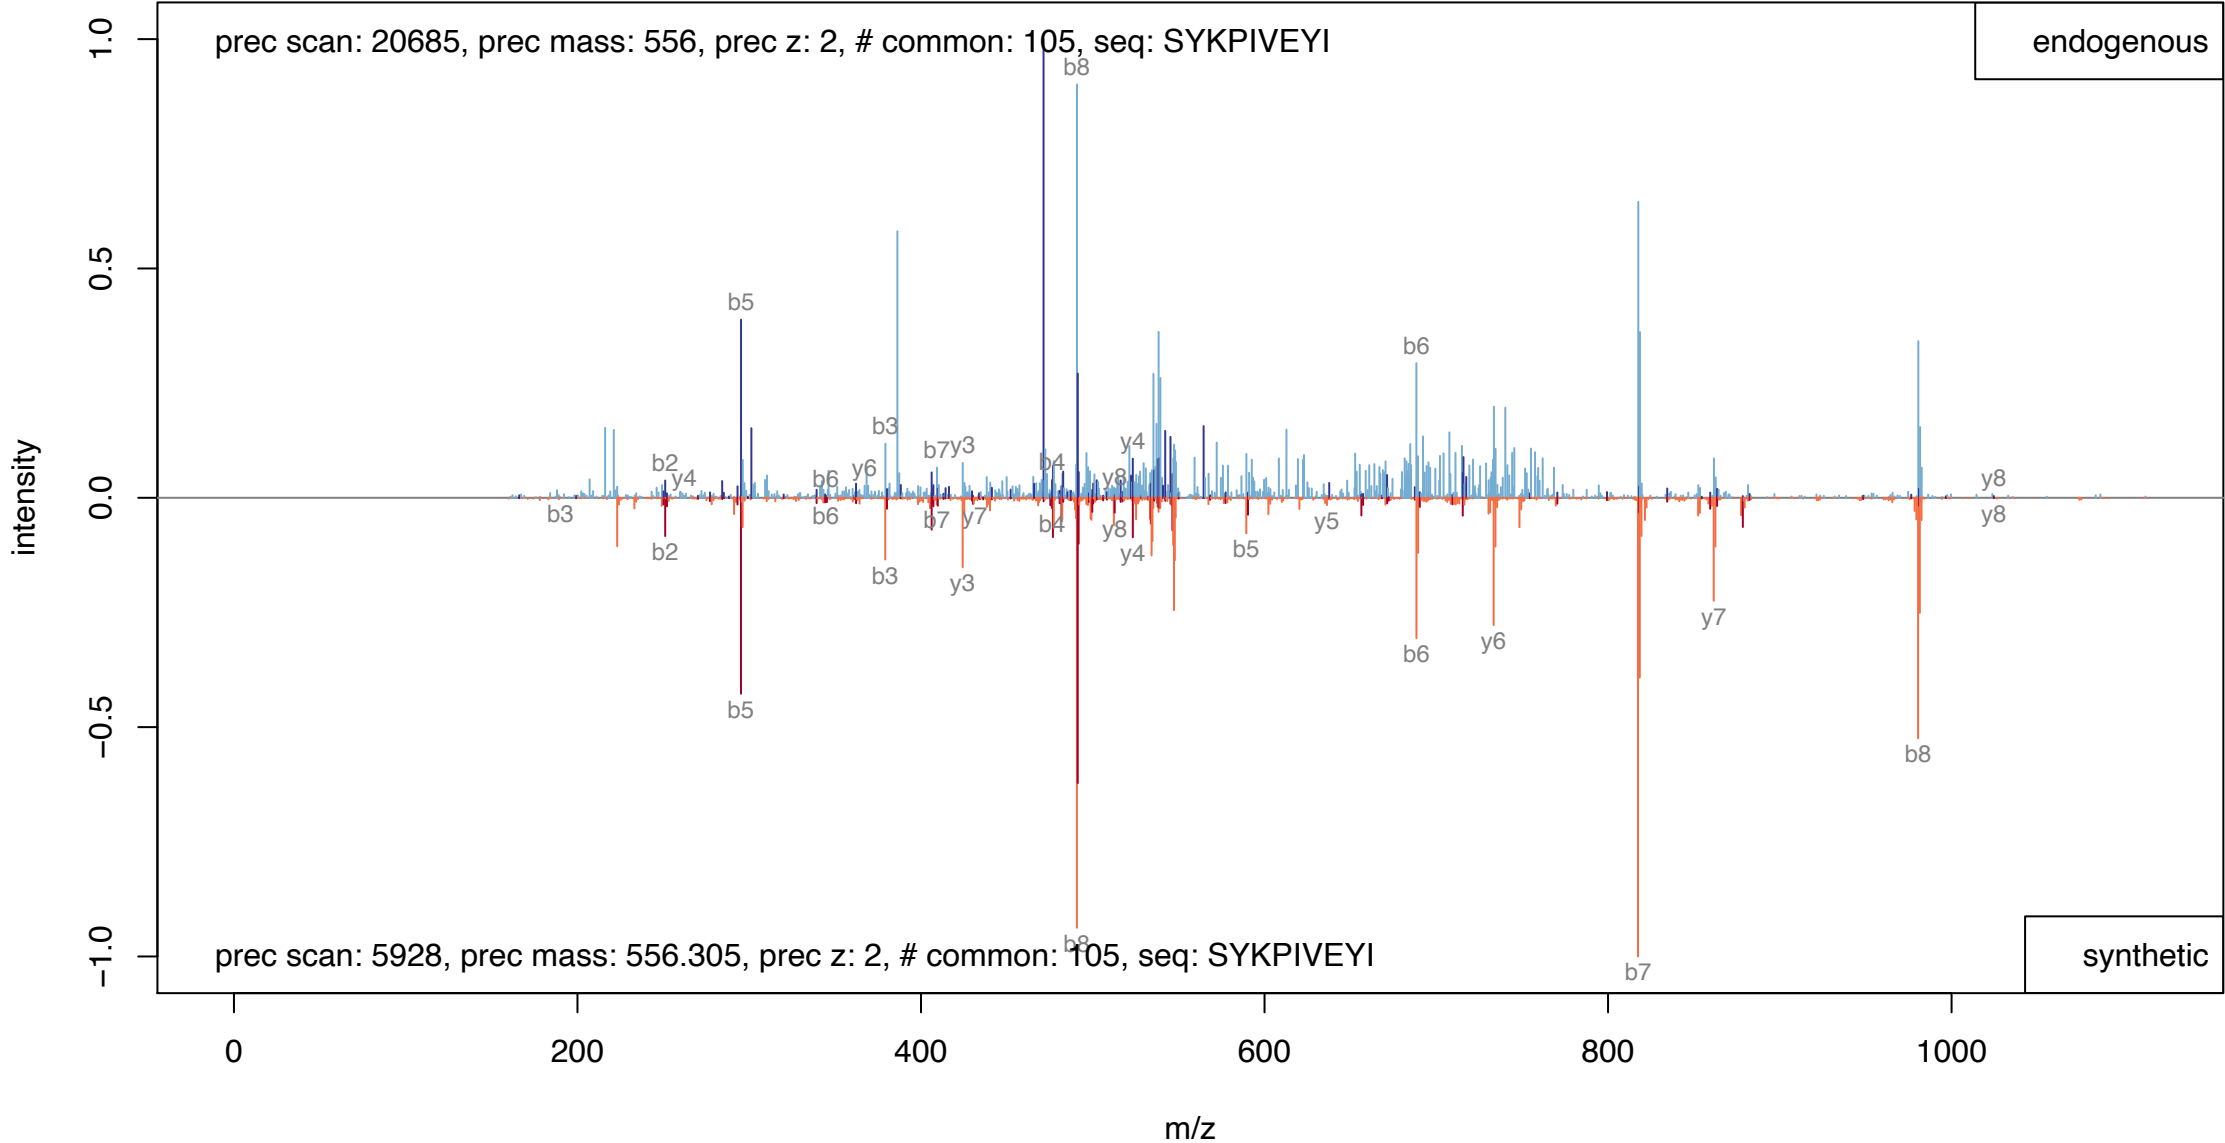

Endogenous: PrecursorError(ppm): -7.07 DeNovoScore: 60 MSGFScore: 45 SpecEValue: 8.80E-10 Eval: 3.64E-07  
Synthetic: PrecursorError(ppm): -1.93 DeNovoScore: 106 MSGFScore: 94 SpecEValue: 1.23E-11 Eval: 5.11E-09

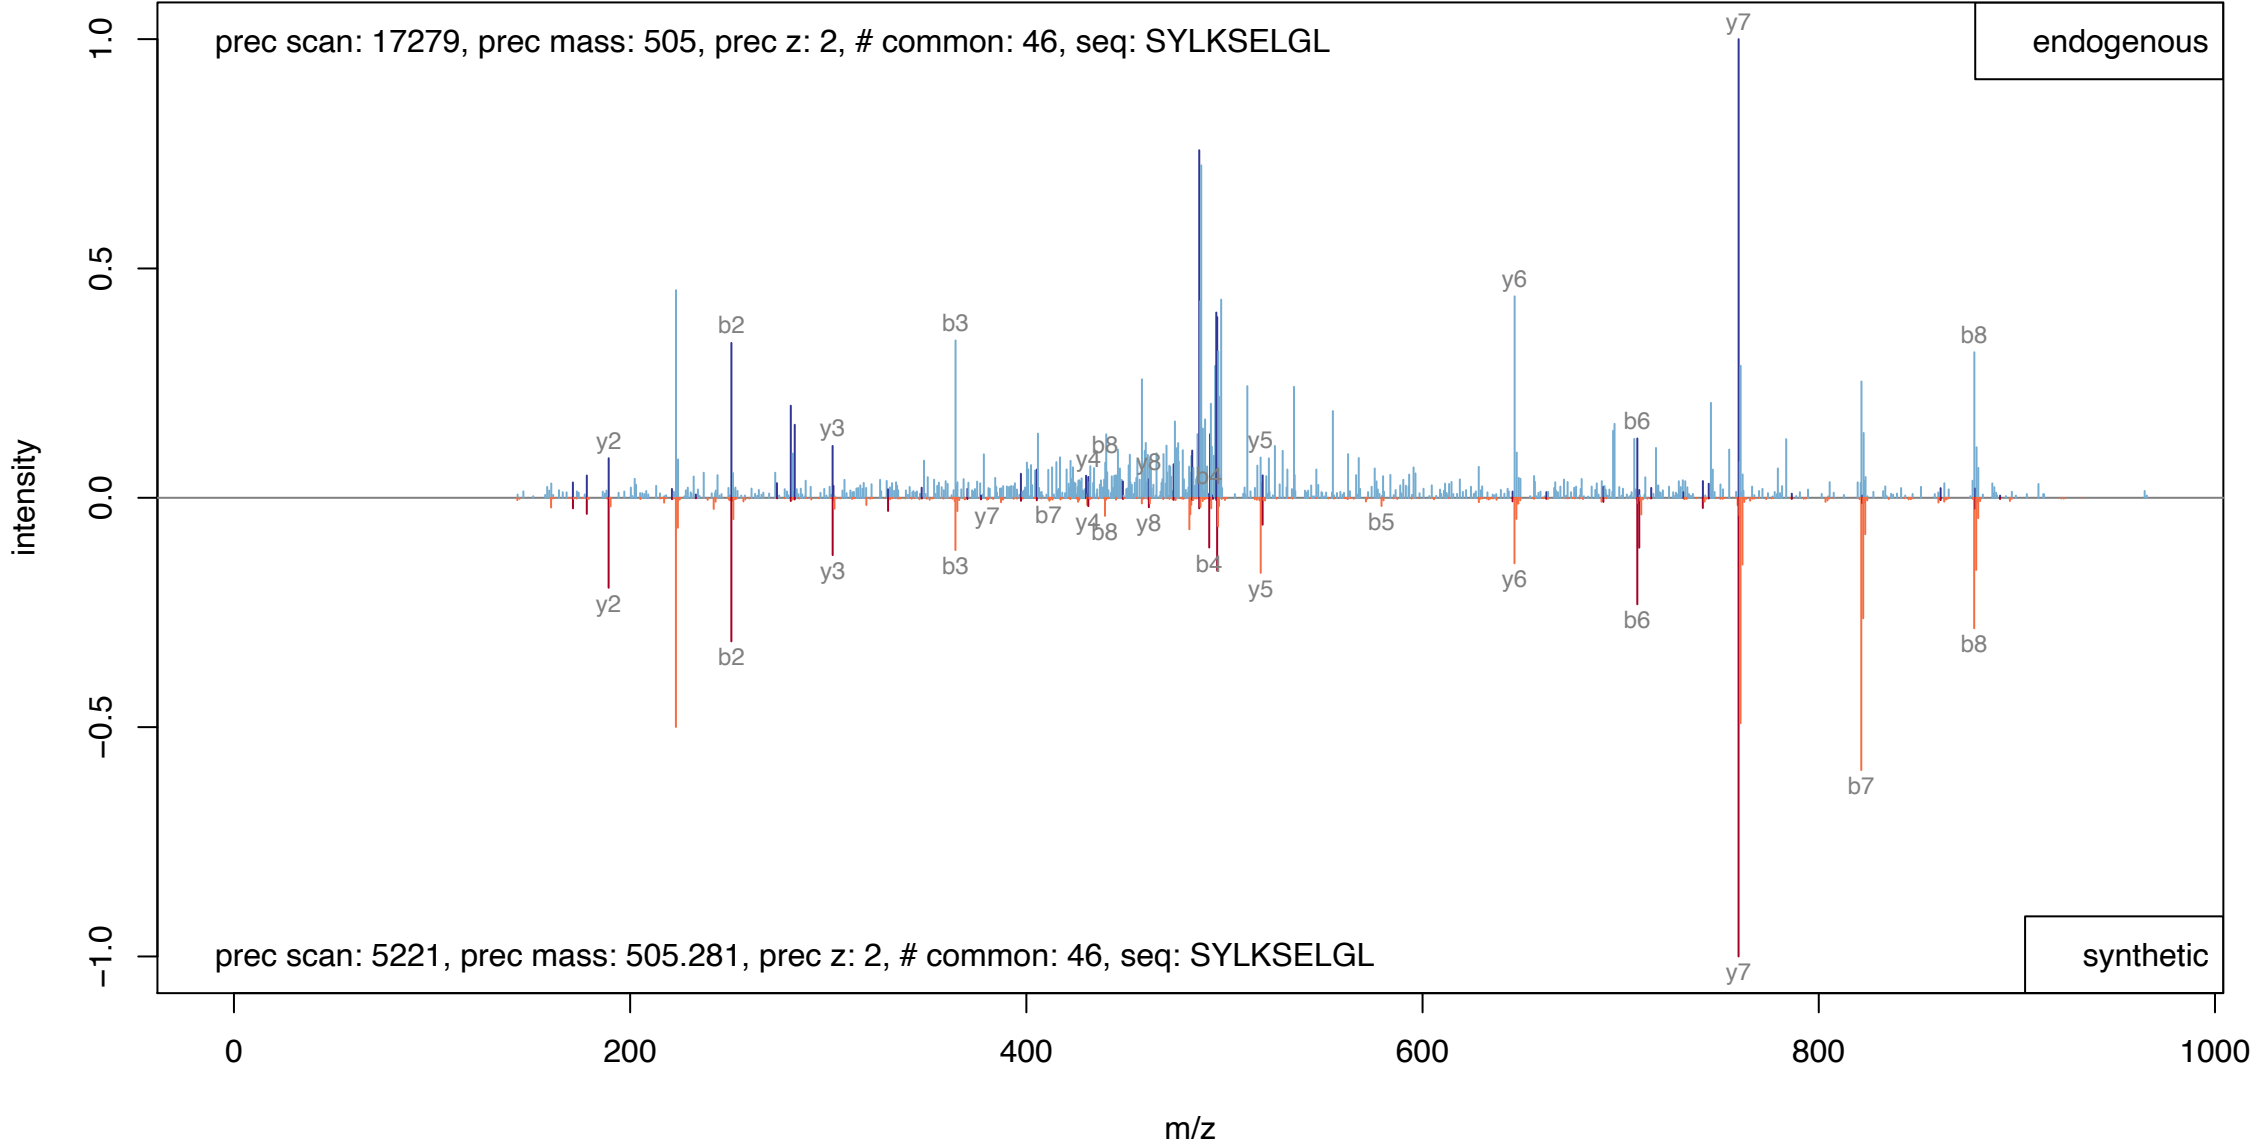

Endogenous: PrecursorError(ppm): -6.03 DeNovoScore: 69 MSGFScore: 69 SpecEValue: 9.77E-13 Eval: 4.04E-10

Synthetic: PrecursorError(ppm): 1.49 DeNovoScore: 86 MSGFScore: 85 SpecEValue: 3.91E-13 Eval: 1.62E-10

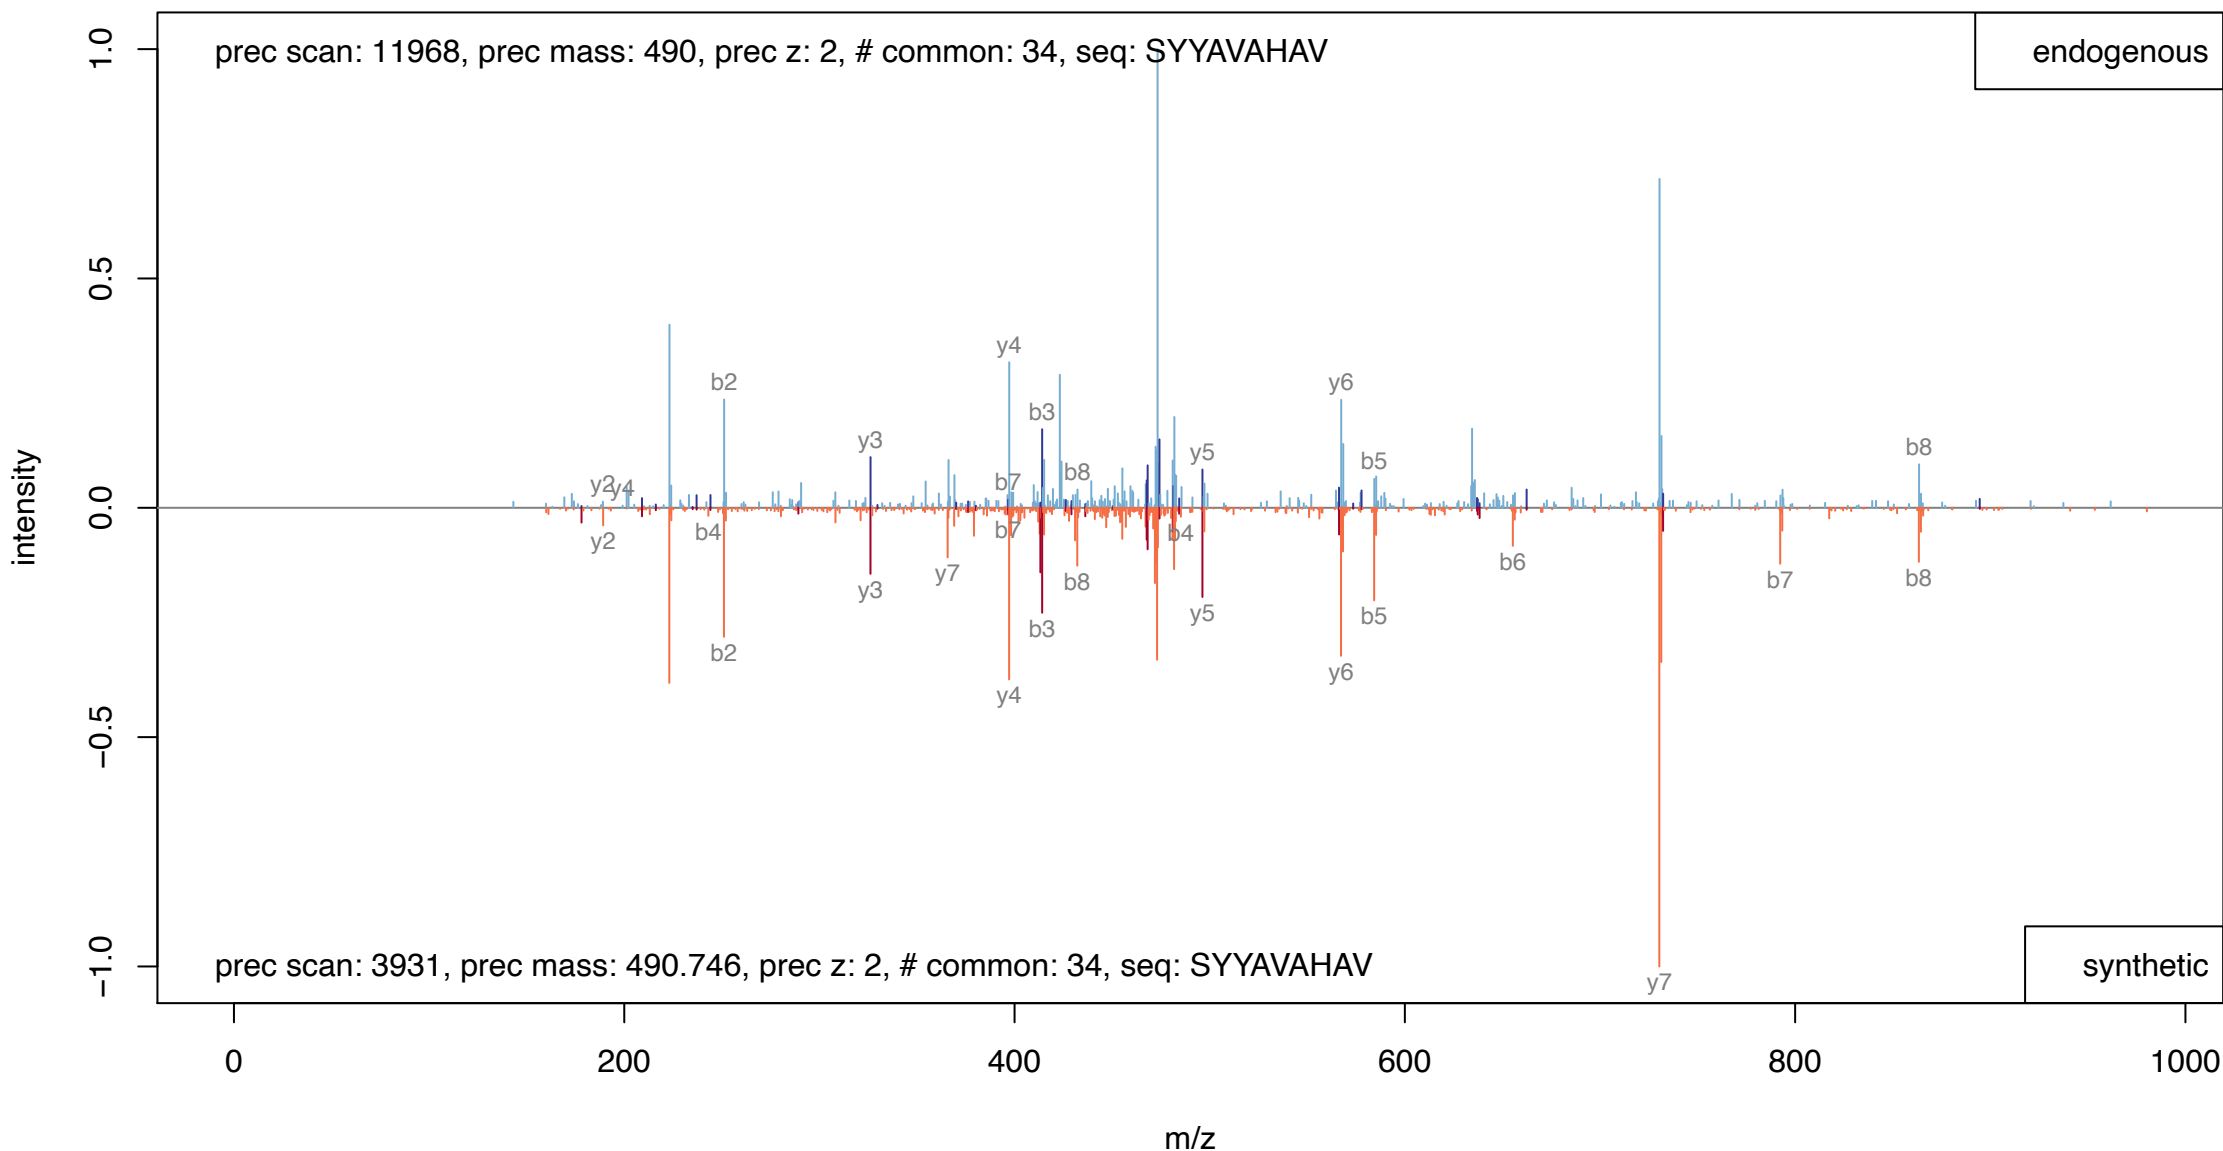

Endogenous: PrecursorError(ppm): 8.95 DeNovoScore: 49 MSGFScore: -27 SpecEValue: 2.36E-03 Evalue: 9.77E-01  
Synthetic: PrecursorError(ppm): 0.70 DeNovoScore: 87 MSGFScore: 87 SpecEValue: 3.91E-13 Evalue: 1.62E-10

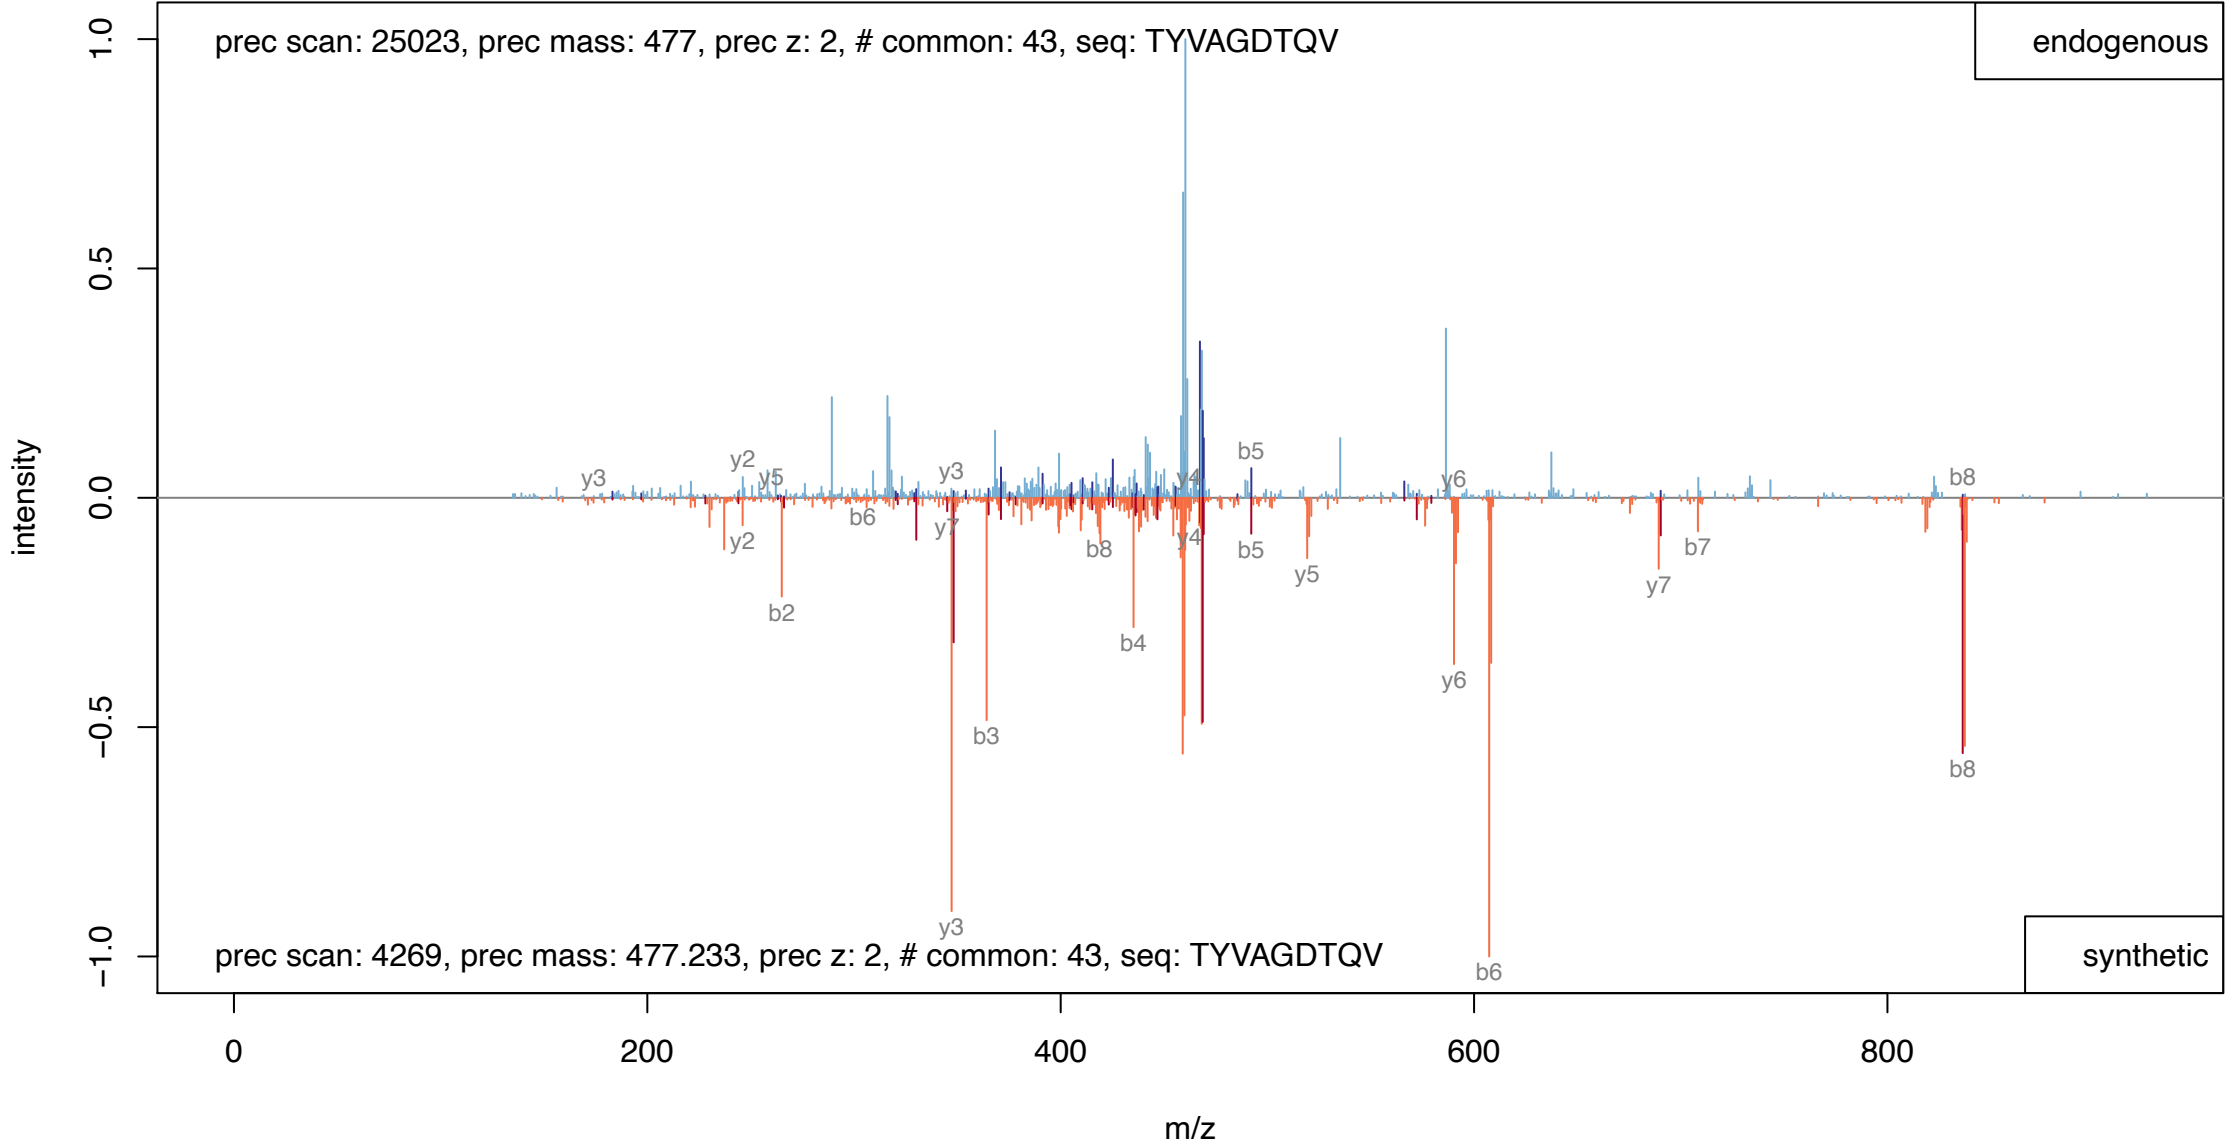

Endogenous: PrecursorError(ppm): -6.47 DeNovoScore: 69 MSGFScore: 42 SpecEValue: 1.27E-09 Evalue: 5.24E-07  
Synthetic: PrecursorError(ppm): -0.18 DeNovoScore: 112 MSGFScore: 103 SpecEValue: 1.42E-11 Evalue: 5.88E-09

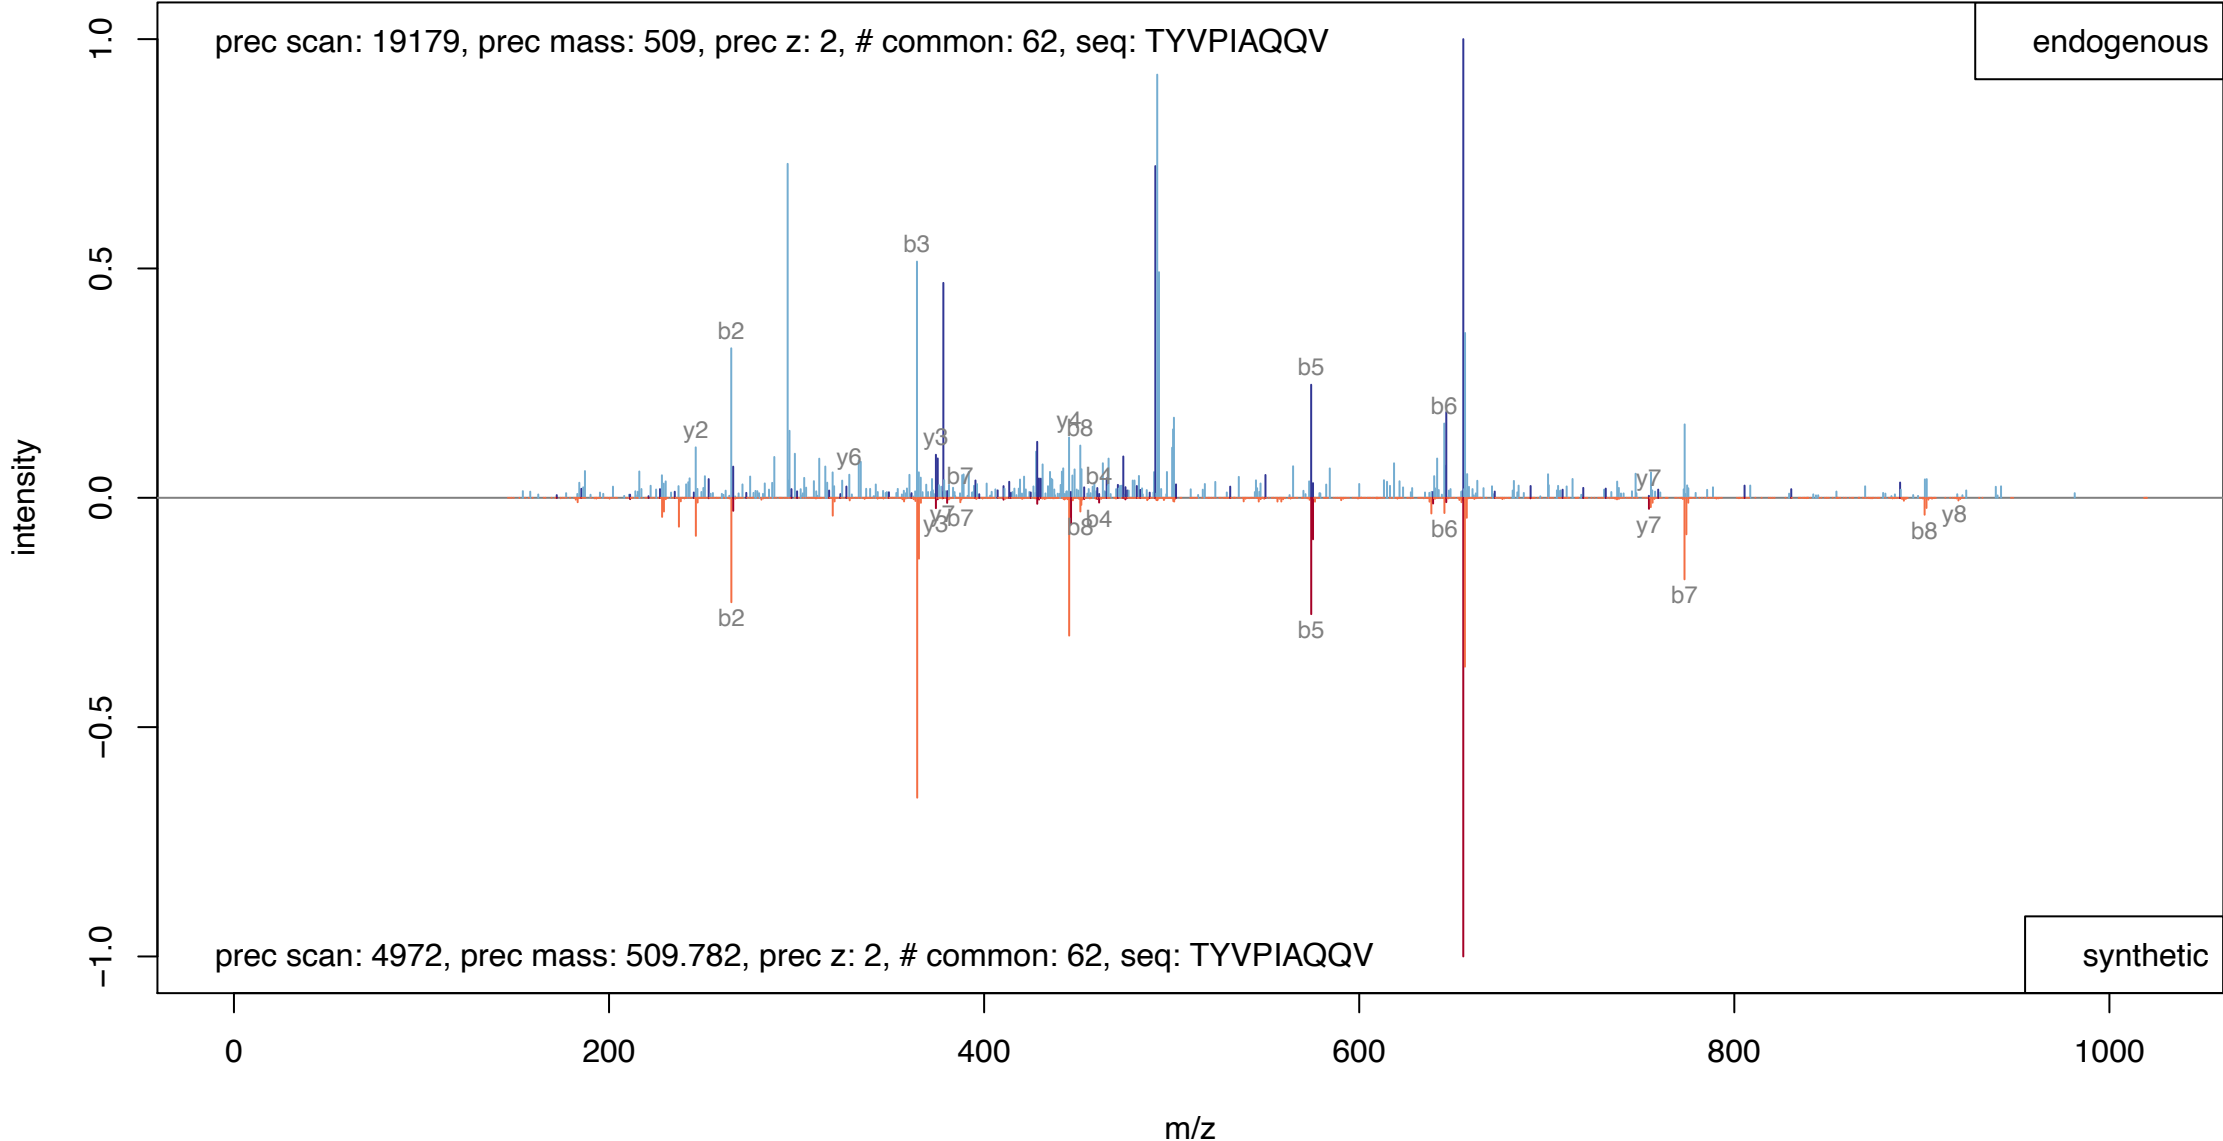

Endogenous: PrecursorError(ppm): -6.50 DeNovoScore: 86 MSGFScore: 80 SpecEValue: 1.65E-11 Evalue: 6.82E-09  
Synthetic: PrecursorError(ppm): -0.45 DeNovoScore: 119 MSGFScore: 119 SpecEValue: 1.56E-12 Evalue: 6.47E-10

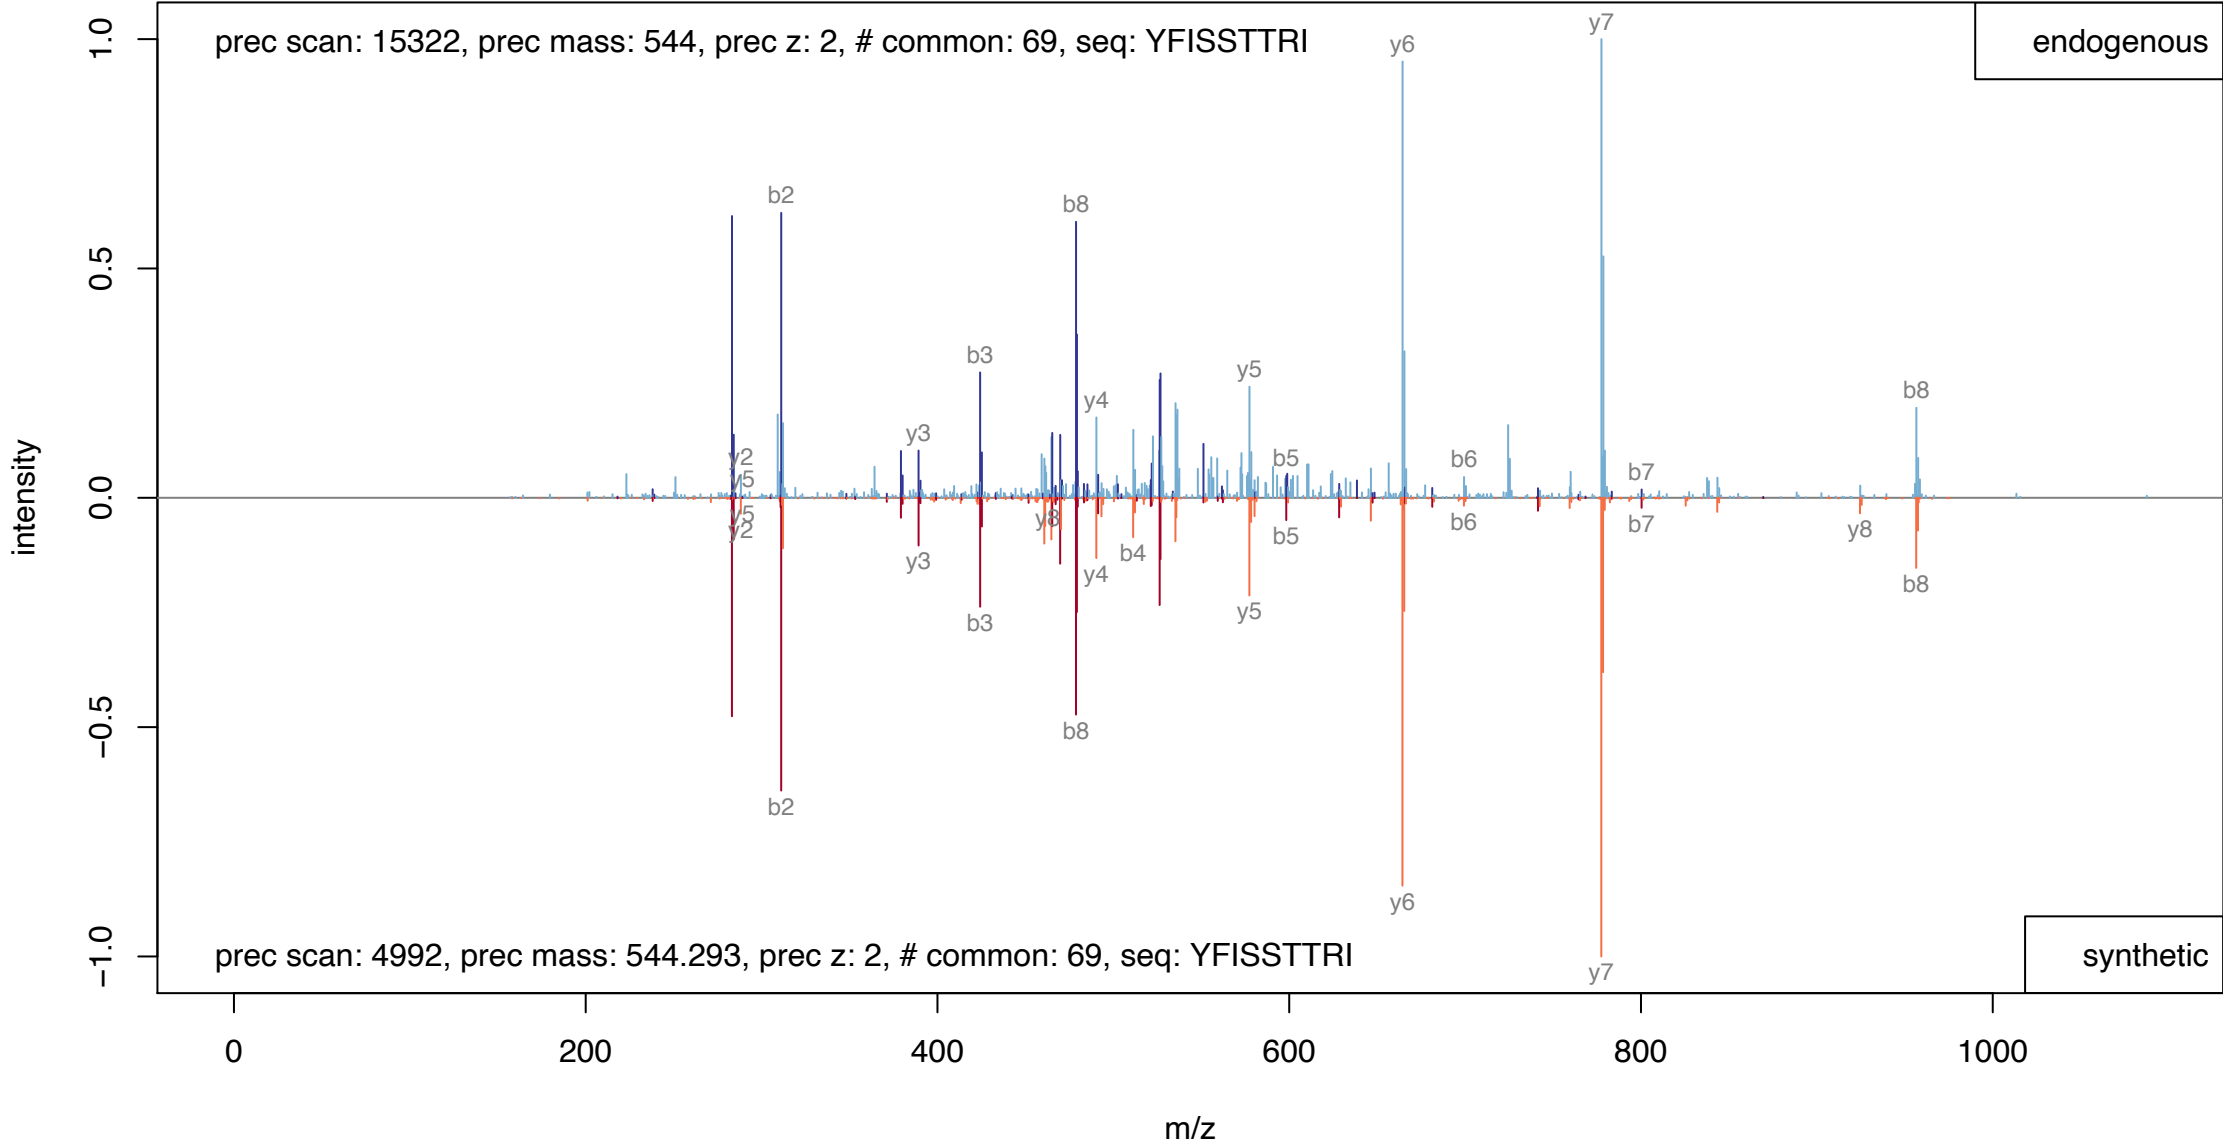

Supplement: s1 [file s1]
