# Supplementary material for: Therapeutic Cancer Vaccination with Immunopeptidomics-Discovered Antigens Confers Protective Antitumor Efficacy
Source: MDPI journal article supplement (doi:10.3390/cancers13143408), 2021-07-07
Supplement: s1 [file s1]

# Supplementary Materials: Therapeutic Cancer Vaccination with Immuno-peptidomics-Discovered Antigens Confers Protective Antitumor Efficacy

Karita Peltonen, Sara Feola, Husen M. Umer, Jacopo Chiaro, Georgios Mermelekas, Erkki Ylösmäki, Sari Pesonen, Rui M. M. Branca, Janne Lehtiö and Vincenzo Cerullo

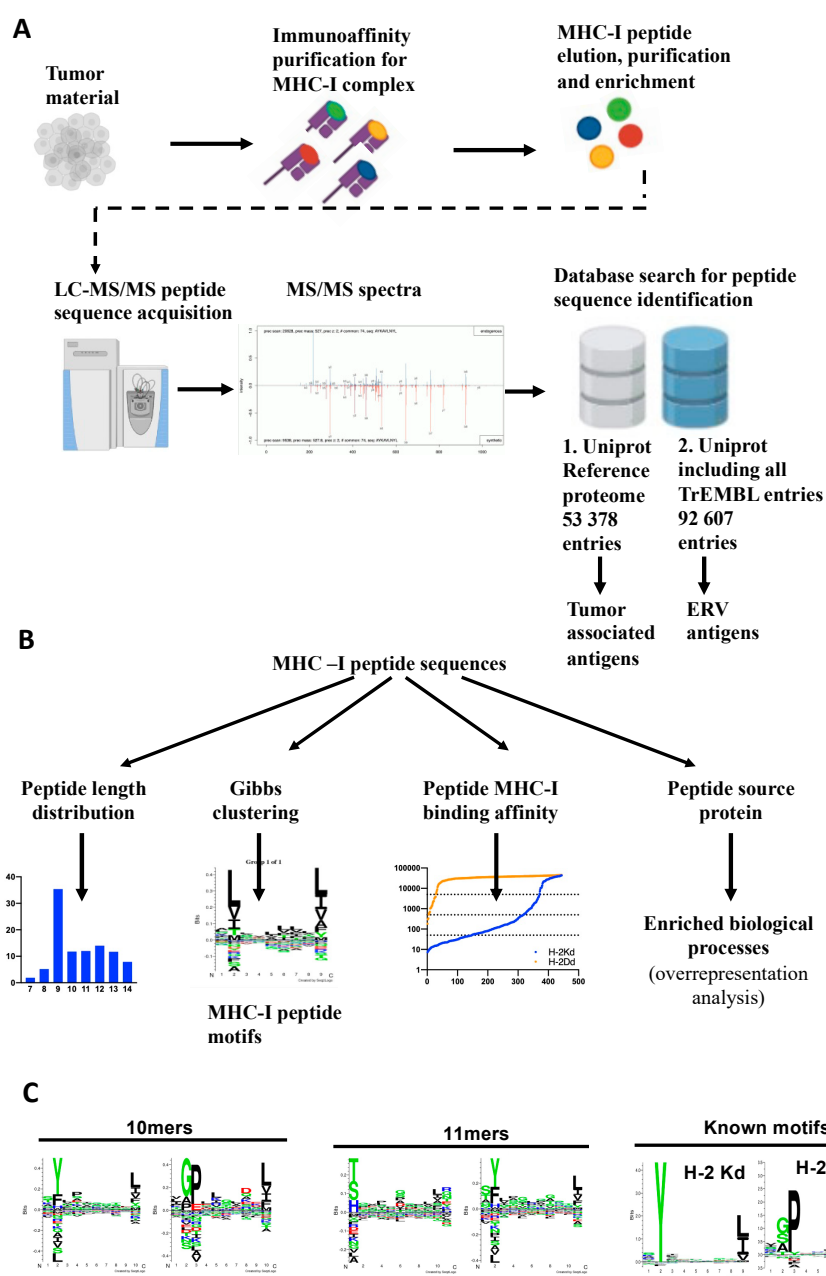

**Figure S1.** (A) Overall workflow for the discovery of MHC-I presented antigens. Tumor associated antigens were identified by searching the mouse reference proteome and ERV antigen by extending the search to include all TrEMBL entries. (B) Bioinformatic analysis workflow. (C) Gibbs clustering for the identified 10mers and 11mers and known H-2K<sup>d</sup> and H-2D<sup>d</sup> ligand binding motifs based on eluted, naturally presented ligand data.

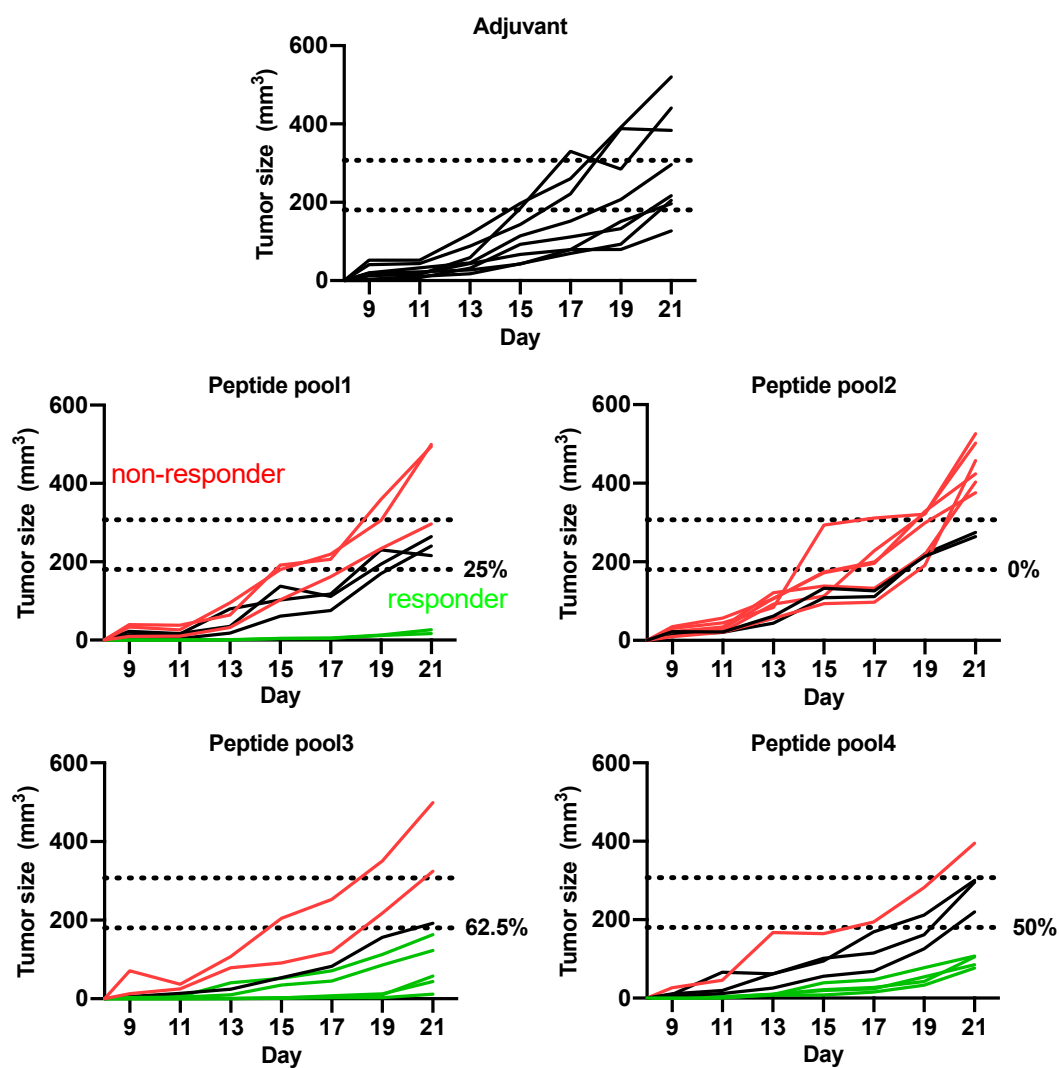

**Figure S2.** Individual tumor growth curves. Dotted lines represent threshold for responders and non-responders. The responder and non-responder mice are highlighted in green and red, respectively, and the percentage of responding mice within the group is given.  $N = 8$  for each group.

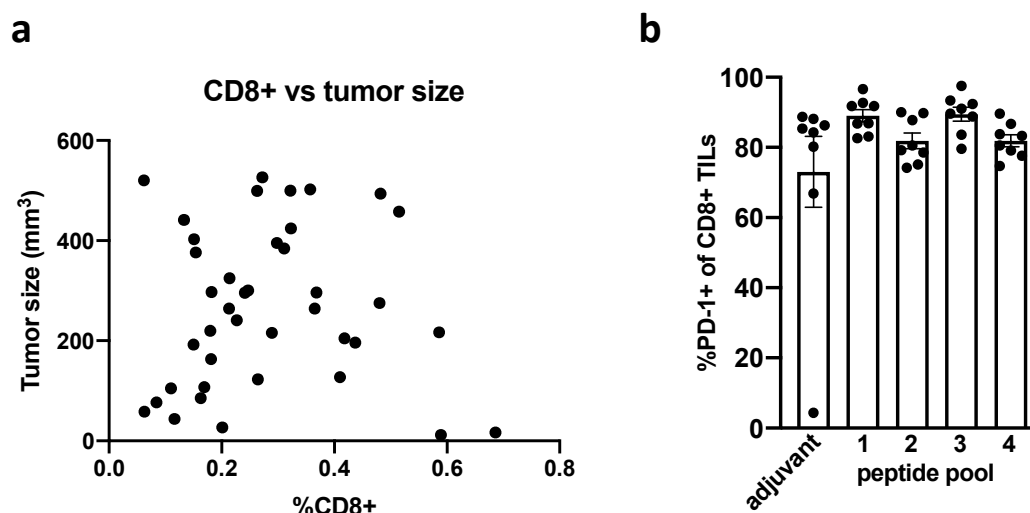

**Figure S3.** Analysis of tumor infiltrating CD8+ T-cells. (A) Correlation analysis of tumor size at endpoint (day 21) vs. percentage of tumor infiltrating CD8+ cells. (B) Percentage of PD-1 positive CD8+ cells in tumors.

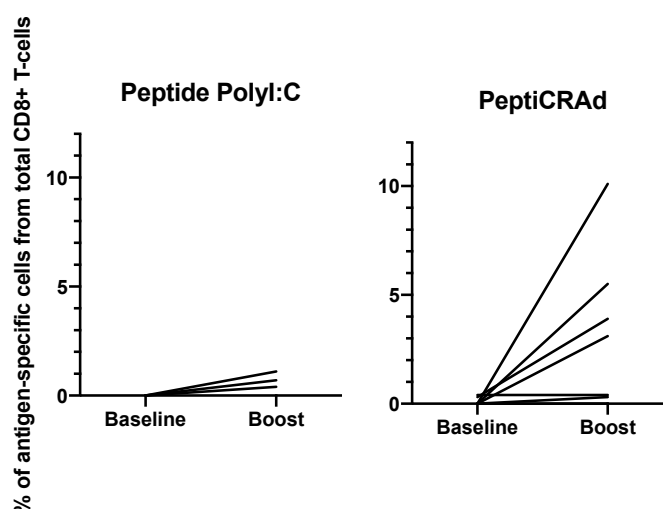

**Figure S4.** Comparison of the vaccination platforms for stimulation of antigen-specific T-cells. Tumor bearing mice were vaccinated with NY-ESO-1 peptide (91-110aa) either intradermally together with Poly I:C as an adjuvant (Peptide PolyI:C) or intratumorally as PeptiCRAAd complexation (PeptiCRAAd). Three priming injections were given on consecutive days followed by one booster injection after 7 days. Blood samples were drawn for the flow cytometric assessment of antigen-specific CD8+ T-cells using tetramer labeling against NY-ESO-1 at baseline (4 days prior first priming) and two weeks after the booster (boost). As animal model humanized mice (NOD/Shi-scid/IL-2R $\gamma$ null (NOG) mice (Taconic) engrafted with cord blood-derived CD34+ hematopoietic stem cells) were used. Engraftment was allowed to establish for 15 weeks prior to monitoring of engraftment level, and animals with a humanization rate equal or above 30% were included in the study.

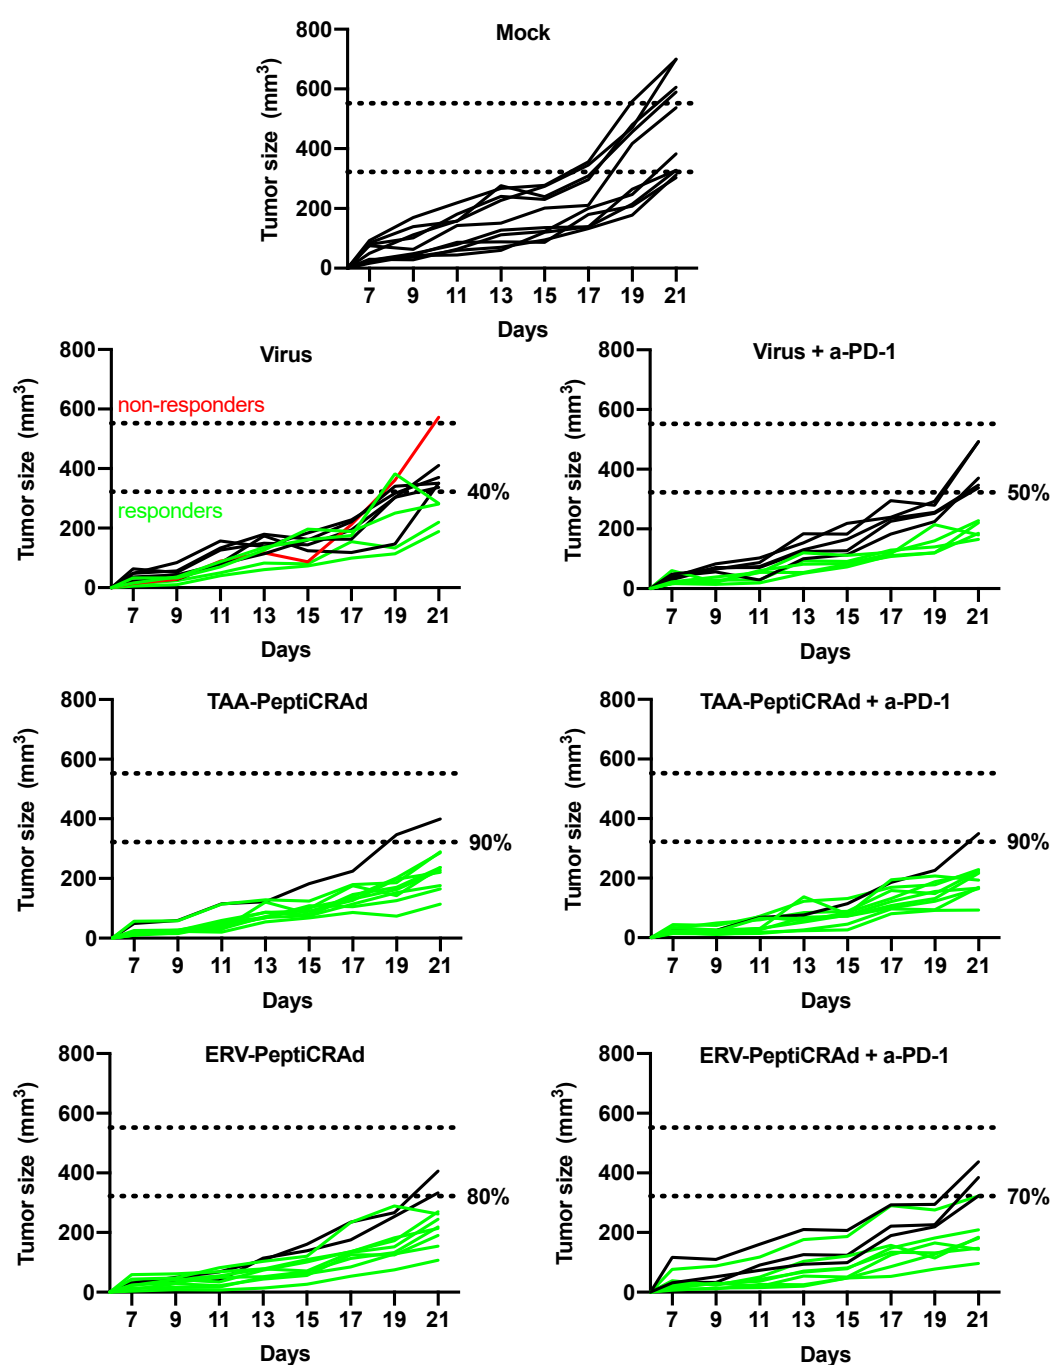

**Figure S5.** Individual tumor growth curves for the therapeutic vaccination experiments using PeptiCRAd platform. Dotted lines represent threshold for responders and non-responders. The responder and non-responder mice are highlighted in green and red, respectively, and the percentage of responding mice within the group is given. Statistical analysis of tumor growth curves was performed using two-way Anova with Tukey's multiple comparison. There was statistical difference between mock and each other treatment group (adjusted  $P$ -value  $< 0.0001$ ); Virus group and each other treatment group except Virus + anti-PD1 (adjusted  $P$ -value 0.013 or lower); and between Virus + anti-PD-1 and TAA-PeptiCRAd + anti-PD1 (adjusted  $P$ -value 0.0012).  $N = 10$  for each group.
