# Supplementary material for: Therapeutic Cancer Vaccination with Immunopeptidomics-Discovered Antigens Confers Protective Antitumor Efficacy
Source: Cancers (Basel). 2021 Jul 7;13(14):3408. doi: 10.3390/cancers13143408 (PMC8306067; doi:10.3390/cancers13143408)
Supplement: Supplementary file 1 [file cancers-13-03408-s001.zip › Supplementary_data_file_1.xlsx]

## Sheet: Sheet1
Supplementary data file 1 for Peltonen et al.,
Annotated mass spectrometry data for the identified MHC-I ligands selected for in vivo experimentation.
	Query #:z	Protein Rank	Peptide < ProteinMetrics Confidential >	Glycans NHFAGNa	Modification Type(s)	Observed m/z	z	Observed (M+H)	Calc. mass (M+H)	Mass error (ppm)	Starting position	Cleavage	Score	Delta	Delta Mod	|Log Prob|	# of unique peptides	Protein Name	Protein DB number
Tumor associated antigens
TAA1	09368:2	251	E.RYLPAPTAL.G			501.29	2	1001.57	1001.58	-5.9	956	Non	351.45	73.18	73.18	5.32	1	>sp|Q9JL70|FANCA_MOUSE Fanconi anemia group A protein homolog OS=Mus musculus OX=10090 GN=Fanca PE=2 SV=2	46133
TAA2	09472:2	415	G.FYITSRTQF.N			581.796	2	1162.58	1162.59	-4.4	214	Non	290.34	66.93	66.93	2.57	1	>tr|F8WI90|F8WI90_MOUSE Tyrosine-protein kinase OS=Mus musculus OX=10090 GN=Src PE=1 SV=1	4457
TAA3	12150:2	80	F.SYFPEITHI.V			553.776	2	1106.54	1106.55	-7	367	Non	305.26	83.16	83.16	6.86	2	>tr|B1ASP2|B1ASP2_MOUSE Tyrosine-protein kinase OS=Mus musculus OX=10090 GN=Jak1 PE=1 SV=1	303
TAA4	11594:2	324	M.FYLETQQQI.S			585.29	2	1169.57	1169.58	-9.7	537	Non	364.95	59.86	59.86	4.19	2	>sp|Q99MP8|BRAP_MOUSE BRCA1-associated protein OS=Mus musculus OX=10090 GN=Brap PE=1 SV=1	40874
TAA5	09314:2	152	H.NYVPGKFTV.S			512.774	2	1024.54	1024.55	-5	394	Non	396.55	151.58	151.58	7.99	2	>tr|E9PXX8|E9PXX8_MOUSE Metastasis-associated in colon cancer 1 OS=Mus musculus OX=10090 GN=Macc1 PE=1 SV=1	26918
TAA6	04812:2	277	I.EYVHTKNFI.H			575.795	2	1150.58	1150.59	-4.8	125	Non	326.49	78.64	78.64	4.88	1	>tr|H7BXB1|H7BXB1_MOUSE Casein kinase I isoform alpha OS=Mus musculus OX=10090 GN=Csnk1a1 PE=1 SV=1	8772
TAA7	05952:2	16	A.NYQDTIGRL.Q			540.274	2	1079.54	1079.55	-6.9	357	Non	365.7	146.35	146.35	9.19	3	>tr|A0A0A6YWC8|A0A0A6YWC8_MOUSE Vimentin OS=Mus musculus OX=10090 GN=Vim PE=1 SV=1	25685
TAA8	09651:2	9	V.KYLATLETL.T			526.301	2	1051.59	1051.6	-8.5	269	Non	433.17	88.22	88.22	8.21	4	>tr|B1ASP2|B1ASP2_MOUSE Tyrosine-protein kinase OS=Mus musculus OX=10090 GN=Jak1 PE=1 SV=1	303
TAA9	07165:2	13	F.YFISSTTRI.N			544.289	2	1087.57	1087.58	-6.5	323	Non	385.98	161.98	161.98	9.66	2	>tr|A0A0A0MQ80|A0A0A0MQ80_MOUSE Spermatogenesis-associated protein 5 OS=Mus musculus OX=10090 GN=Spata5 PE=1 SV=1	17936
TAA10	08390:2	371	Q.SYLKSELGL.G			505.278	2	1009.55	1009.56	-7.2	1053	Non	275.77	24.38	24.38	2	3	>tr|A2AQD5|A2AQD5_MOUSE Sperm-specific antigen 2 homolog OS=Mus musculus OX=10090 GN=Ssfa2 PE=1 SV=1	15549
TAA11	07580:2	414	L.SYHPALNAI.L			493.256	2	985.504	985.51	-6.3	49	Non	325.85	38.66	38.66	2.63	2	>tr|S4R1L5|S4R1L5_MOUSE Baculoviral IAP repeat-containing protein 6 OS=Mus musculus OX=10090 GN=Birc6 PE=1 SV=1	9118
TAA12	05461:2	168	Q.SYYAVAHAV.T			490.743	2	980.479	980.484	-5.1	730	Non	319.57	129.04	129.04	7.08	2	>tr|A0A0R4J170|A0A0R4J170_MOUSE Transcription activator BRG1 OS=Mus musculus OX=10090 GN=Smarca4 PE=1 SV=1	10346
TAA13	11103:2	225	K.AYKAVLNYL.K			527.797	2	1054.59	1054.59	-6.1	77	CRagged	340.6	154.44	154.44	5.69	1	>tr|D3YXN3|D3YXN3_MOUSE Testis-expressed protein 30 (Fragment) OS=Mus musculus OX=10090 GN=Tex30 PE=1 SV=8	7518
TAA14	12583:2	168	D.EYVANLTEL.V			526.266	2	1051.52	1051.53	-5.5	559	Non	288.61	3.19	3.19	2.94	2	>tr|A0A0R4J170|A0A0R4J170_MOUSE Transcription activator BRG1 OS=Mus musculus OX=10090 GN=Smarca4 PE=1 SV=1	10346
TAA15	06815:2	364	A.KYSAQIEDL.Q			533.771	2	1066.54	1066.54	-5.9	661	Non	286.38	39.53	39.53	3.3	1	>tr|B1AUF1|B1AUF1_MOUSE Ski oncogene OS=Mus musculus OX=10090 GN=Ski PE=1 SV=1	5032
TAA16	05394:2	60	I.EYIHSKNFI.H			575.794	2	1150.58	1150.59	-6.4	117	Non	392.38	102.54	102.54	7.47	3	>sp|Q9DC28|KC1D_MOUSE Casein kinase I isoform delta OS=Mus musculus OX=10090 GN=Csnk1d PE=1 SV=2	41613
TAA17	05160:2	124	W.KYQAVTATL.E			497.78	2	994.552	994.557	-4.4	391	Non	238.99	19.42	19.42	2.88	2	>tr|A0A1B0GS68|A0A1B0GS68_MOUSE Uncharacterized protein OS=Mus musculus OX=10090 GN=Gm45713 PE=2 SV=1	2038
TAA18	07275:2	418	G.KYQEALDVI.R			539.79	2	1078.57	1078.58	-5.5	208	Non	290.37	39.32	39.32	1.46	1	>sp|Q8BWZ3|NAA25_MOUSE N-alpha-acetyltransferase 25, NatB auxiliary subunit OS=Mus musculus OX=10090 GN=Naa25 PE=1 SV=1	47383
TAA19	06966:2	396	Q.SYENM[+15.995]VTEI.M		M[+16]	551.239	2	1101.47	1101.48	-5.8	189	Non	302.02	40.38	40.38	1.37	1	>sp|P54728|RD23B_MOUSE UV excision repair protein RAD23 homolog B OS=Mus musculus OX=10090 GN=Rad23b PE=1 SV=2	36650
TAA20	11063:2	230	D.SYKPIVEYI.D			556.302	2	1111.6	1111.6	-6.7	113	Non	280.92	88.21	88.21	6.59	1	>tr|A0A0J9YUL3|A0A0J9YUL3_MOUSE Septin 11, isoform CRA_b OS=Mus musculus OX=10090 GN=Sept11 PE=1 SV=1	3694
TAA21	10176:2	245	S.TYVPIAQQV.E			509.779	2	1018.55	1018.56	-6.5	325	Non	281.74	67.36	67.36	5.36	1	>sp|A2APB8|TPX2_MOUSE Targeting protein for Xklp2 OS=Mus musculus OX=10090 GN=Tpx2 PE=1 SV=1	44138
ERV antigen
ERV1	07593:2	160	T.FYLPTIRAV.K			540.315	2	1079.62	1079.62	-2.5	105	Non	331.43	52.5	52.5	4.75	1	>tr|Q811J2|Q811J2_MOUSE LOC72520 protein (Fragment) OS=Mus musculus OX=10090 GN=LOC72520 PE=2 SV=2	81733

## Sheet: Sheet2
Supplementary data file 1 for Peltonen et al.,
List of identified peptides using the Uniprot reference database with 53378 entries
Query #:z	Protein Rank	Peptide < ProteinMetrics Confidential >	Glycans NHFAGNa	Modification Type(s)	Observed m/z	z	Observed (M+H)	Calc. mass (M+H)	Off-by-x error	Mass error (ppm)	Starting position	Cleavage	Score	Delta	Delta Mod	|Log Prob|	# of unique peptides	Protein Name	Protein DB number	Scan #	Scan Time
03406:2	70	Q.TSSLPSASHFSQ.L			624.791	2	1248.58	1248.59	0	-8.2	2301	Non	278.69	116.14	116.14	6.65	6	>tr|S4R294|S4R294_MOUSE Protein PRRC2C OS=Mus musculus OX=10090 GN=Prrc2c PE=1 SV=1	22284	controllerType=0 controllerNumber=1 scan=9350	57.3594
08468:2	70	Q.TSSLPSASHFSQLS.C			724.852	2	1448.7	1448.7	0	-3.7	2301	Non	238.74	62.84	62.84	5.24	6	>tr|S4R294|S4R294_MOUSE Protein PRRC2C OS=Mus musculus OX=10090 GN=Prrc2c PE=1 SV=1	22284	controllerType=0 controllerNumber=1 scan=15875	72.6443
10696:2	70	G.SSQLIDTHLLQ.A			627.833	2	1254.66	1254.67	0	-7.4	2487	Non	241.52	62.14	62.14	3.67	6	>tr|S4R294|S4R294_MOUSE Protein PRRC2C OS=Mus musculus OX=10090 GN=Prrc2c PE=1 SV=1	22284	controllerType=0 controllerNumber=1 scan=19947	88.1921
04230:2	70	Y.SGQVQQPGQTNF.Y			645.802	2	1290.6	1290.61	0	-8	2510	Non	190.65	49.82	49.82	2.28	6	>tr|S4R294|S4R294_MOUSE Protein PRRC2C OS=Mus musculus OX=10090 GN=Prrc2c PE=1 SV=1	22284	controllerType=0 controllerNumber=1 scan=10392	59.8499
03048:2	70	T.SSLPSASHFSQ.L			574.268	2	1147.53	1147.54	0	-8.6	2302	Non	231.09	38	38	2.2	6	>tr|S4R294|S4R294_MOUSE Protein PRRC2C OS=Mus musculus OX=10090 GN=Prrc2c PE=1 SV=1	22284	controllerType=0 controllerNumber=1 scan=8900	56.2845
07580:2	414	L.SYHPALNAI.L			493.256	2	985.504	985.51	0	-6.3	49	Non	325.85	38.66	38.66	2.63	2	>tr|S4R1L5|S4R1L5_MOUSE Baculoviral IAP repeat-containing protein 6 OS=Mus musculus OX=10090 GN=Birc6 PE=1 SV=1	9118	controllerType=0 controllerNumber=1 scan=14721	69.9918
10258:2	447	E.TYNDLIKQI.G			554.303	2	1107.6	1107.6	0	-5.6	300	Non	289.66	33.99	33.99	2.02	2	>tr|Q9JK62|Q9JK62_MOUSE Potassium channel TASK2 OS=Mus musculus OX=10090 GN=Kcnk5 PE=1 SV=1	3873	controllerType=0 controllerNumber=1 scan=19299	86.2259
06492:2	82	P.HVNPLPTGYEDE.-			685.81	2	1370.61	1370.62	0	-7.2	101	Non	348.62	183.44	183.44	7.13	2	>tr|Q9DCW5|Q9DCW5_MOUSE Cytochrome c oxidase subunit 6A, mitochondrial OS=Mus musculus OX=10090 GN=Cox6a1 PE=1 SV=1	5312	controllerType=0 controllerNumber=1 scan=13250	66.287
07358:2	82	H.NPHVNPLPTGYE.D			669.325	2	1337.64	1337.65	0	-4.2	99	Non	248.75	78.71	78.71	5.49	2	>tr|Q9DCW5|Q9DCW5_MOUSE Cytochrome c oxidase subunit 6A, mitochondrial OS=Mus musculus OX=10090 GN=Cox6a1 PE=1 SV=1	5312	controllerType=0 controllerNumber=1 scan=14427	69.2857
09292:2	43	A.DYKESFNTI.G			558.761	2	1116.51	1116.52	0	-6.2	336	Non	399.54	93.19	93.19	7.71	3	>tr|Q9DCN4|Q9DCN4_MOUSE Grainyhead-like protein 2 homolog OS=Mus musculus OX=10090 GN=Grhl2 PE=2 SV=1	5314	controllerType=0 controllerNumber=1 scan=16999	75.453
07769:2	43	I.ADYKESFNTI.G			594.28	2	1187.55	1187.56	0	-4.8	335	Non	374.32	92.96	92.96	7.64	3	>tr|Q9DCN4|Q9DCN4_MOUSE Grainyhead-like protein 2 homolog OS=Mus musculus OX=10090 GN=Grhl2 PE=2 SV=1	5314	controllerType=0 controllerNumber=1 scan=14966	70.5499
05577:2	43	D.YKESFNTI.G			501.248	2	1001.49	1001.49	0	-5.1	337	Non	308.31	36.47	36.47	3.14	3	>tr|Q9DCN4|Q9DCN4_MOUSE Grainyhead-like protein 2 homolog OS=Mus musculus OX=10090 GN=Grhl2 PE=2 SV=1	5314	controllerType=0 controllerNumber=1 scan=12120	63.8202
02278:2	418	M.HQGPPDTAEIIK.S			653.338	2	1305.67	1305.68	0	-8.8	64	NRagged	238.17	79.16	79.16	2.53	1	>tr|Q9D6T9|Q9D6T9_MOUSE 28S ribosomal protein S36, mitochondrial OS=Mus musculus OX=10090 GN=Mrps36 PE=1 SV=1	4010	controllerType=0 controllerNumber=1 scan=7901	53.8667
10089:2	340	F.TYVNVYGTHVL.V			633.328	2	1265.65	1265.65	0	-2.5	115	Non	256	79.71	79.71	3.85	1	>tr|Q9D0D1|Q9D0D1_MOUSE TDP-glucose 4,6-dehydratase, isoform CRA_c OS=Mus musculus OX=10090 GN=Tgds PE=2 SV=1	27949	controllerType=0 controllerNumber=1 scan=19057	85.5187
02742:2	102	G.TQSAPQGYGSTGGYG.S			715.81	2	1430.61	1430.62	0	-4.5	69	Non	205.38	103.42	103.42	5.95	3	>tr|Q91VQ2|Q91VQ2_MOUSE Fus protein OS=Mus musculus OX=10090 GN=Fus PE=1 SV=1	3463	controllerType=0 controllerNumber=1 scan=8503	55.3226
03602:2	102	S.SYPGYGQQPAPSS.T			669.798	2	1338.59	1338.6	0	-5.4	97	Non	225.32	78.76	78.76	5.52	3	>tr|Q91VQ2|Q91VQ2_MOUSE Fus protein OS=Mus musculus OX=10090 GN=Fus PE=1 SV=1	3463	controllerType=0 controllerNumber=1 scan=9595	57.9436
02751:2	102	G.AYPTQPGQGYSQ.Q			648.794	2	1296.58	1296.59	0	-3.9	16	Non	127.62	42.54	42.54	2.14	3	>tr|Q91VQ2|Q91VQ2_MOUSE Fus protein OS=Mus musculus OX=10090 GN=Fus PE=1 SV=1	3463	controllerType=0 controllerNumber=1 scan=8514	55.3439
08743:2	431	D.KFLASVSTV.L			476.277	2	951.546	951.551	0	-5.1	128	Non	284.52	47.03	47.03	2.37	1	>tr|Q91VB8|Q91VB8_MOUSE Alpha globin 1 OS=Mus musculus OX=10090 GN=Hba-a1 PE=1 SV=1	269	controllerType=0 controllerNumber=1 scan=16238	73.502
09219:2	425	K.KYIDQKFVL.A			577.331	2	1153.65	1153.66	0	-6.1	225	CRagged	316.83	54.63	54.63	2.49	2	>tr|Q91V89|Q91V89_MOUSE Serine/threonine-protein phosphatase 2A 56 kDa regulatory subunit OS=Mus musculus OX=10090 GN=Ppp2r5d PE=1 SV=1	2761	controllerType=0 controllerNumber=1 scan=16891	75.155
11275:2	446	G.VFNPAKELI.A			515.797	2	1030.59	1030.59	0	-6.2	304	Non	283.85	26.58	26.58	2.02	2	>tr|Q8R3P8|Q8R3P8_MOUSE Ring finger protein 113A1 OS=Mus musculus OX=10090 GN=Rnf113a1 PE=1 SV=1	3170	controllerType=0 controllerNumber=1 scan=20951	91.9806
10458:2	95	G.SELVQKFIGEGA.R			639.337	2	1277.67	1277.67	0	-6	217	Non	321.32	101.38	101.38	8.37	3	>tr|Q8K1K2|Q8K1K2_MOUSE 26S proteasome regulatory subunit 8 OS=Mus musculus OX=10090 GN=Psmc5 PE=1 SV=1	4305	controllerType=0 controllerNumber=1 scan=19601	87.1527
11587:2	95	V.SGSELVQKFIGEGA.R			711.362	2	1421.72	1421.73	0	-6.5	215	Non	203.83	40.09	40.09	3.21	3	>tr|Q8K1K2|Q8K1K2_MOUSE 26S proteasome regulatory subunit 8 OS=Mus musculus OX=10090 GN=Psmc5 PE=1 SV=1	4305	controllerType=0 controllerNumber=1 scan=21474	93.9821
10216:2	95	G.SELVQKFIGE.G			575.307	2	1149.61	1149.62	0	-6.4	217	Non	206.67	5.7	5.7	1.91	3	>tr|Q8K1K2|Q8K1K2_MOUSE 26S proteasome regulatory subunit 8 OS=Mus musculus OX=10090 GN=Psmc5 PE=1 SV=1	4305	controllerType=0 controllerNumber=1 scan=19237	86.0312
09375:2	13	K.TWTAADM[+15.995]AAQIT.R		M[+16]	648.297	2	1295.59	1295.59	0	-4.8	181	CRagged	545.73	315.42	315.42	8.74	4	>tr|Q8HWB2|Q8HWB2_MOUSE Histocompatibility 2, Q region locus 4 OS=Mus musculus OX=10090 GN=H2-Q4 PE=1 SV=1	1246	controllerType=0 controllerNumber=1 scan=17762	80.6883
07291:2	13	K.TWTAADM[+15.995]AAQITR.R		M[+16]	726.347	2	1451.69	1451.69	0	-4.9	181	Specific	563.18	275.69	275.69	8.33	4	>tr|Q8HWB2|Q8HWB2_MOUSE Histocompatibility 2, Q region locus 4 OS=Mus musculus OX=10090 GN=H2-Q4 PE=1 SV=1	1246	controllerType=0 controllerNumber=1 scan=14345	69.1149
12784:2	13	K.TWTAADMAAQIT.R			640.3	2	1279.59	1279.6	0	-5.3	181	CRagged	381.42	155.51	155.51	8.25	4	>tr|Q8HWB2|Q8HWB2_MOUSE Histocompatibility 2, Q region locus 4 OS=Mus musculus OX=10090 GN=H2-Q4 PE=1 SV=1	1246	controllerType=0 controllerNumber=1 scan=23766	104.052
11363:2	13	K.TWTAADMAAQITR.R			718.348	2	1435.69	1435.7	0	-7	181	Specific	495.4	188.53	188.53	7.68	4	>tr|Q8HWB2|Q8HWB2_MOUSE Histocompatibility 2, Q region locus 4 OS=Mus musculus OX=10090 GN=H2-Q4 PE=1 SV=1	1246	controllerType=0 controllerNumber=1 scan=21106	92.624
08429:2	198	A.SYVQVIRAP.E			516.793	2	1032.58	1032.58	0	-4.4	54	Non	346.02	91.06	91.06	7.37	1	>tr|Q8C788|Q8C788_MOUSE Sorting nexin OS=Mus musculus OX=10090 GN=Snx18 PE=1 SV=1	4909	controllerType=0 controllerNumber=1 scan=15827	72.5481
06784:2	362	G.SYKAM[+15.995]FQQL.M		M[+16]	566.275	2	1131.54	1131.55	0	-6.5	205	Non	298.42	60.24	60.24	2.74	1	>tr|Q8C2T6|Q8C2T6_MOUSE DNA polymerase alpha subunit B OS=Mus musculus OX=10090 GN=Pola2 PE=1 SV=1	4562	controllerType=0 controllerNumber=1 scan=13698	67.6354
09702:2	181	K.TEEKPIFSLNT.I			639.829	2	1278.65	1278.66	0	-5.5	174	CRagged	354.52	185.72	185.72	7.57	1	>tr|Q8C2Q8|Q8C2Q8_MOUSE ATP synthase subunit gamma OS=Mus musculus OX=10090 GN=Atp5c1 PE=1 SV=1	2725	controllerType=0 controllerNumber=1 scan=18486	83.8326
09129:2	8	G.SNFVSAGIQTS.F			555.772	2	1110.54	1110.54	0	-4.8	547	Non	579.36	254.28	254.28	9.66	15	>tr|Q8BTS0|Q8BTS0_MOUSE DEAD (Asp-Glu-Ala-Asp) box polypeptide 5 OS=Mus musculus OX=10090 GN=Ddx5 PE=1 SV=1	5582	controllerType=0 controllerNumber=1 scan=16767	74.849
12645:2	8	G.SNFVSAGIQTSF.R			629.306	2	1257.6	1257.61	0	-5.8	547	Non	484.92	269.17	269.17	9.24	15	>tr|Q8BTS0|Q8BTS0_MOUSE DEAD (Asp-Glu-Ala-Asp) box polypeptide 5 OS=Mus musculus OX=10090 GN=Ddx5 PE=1 SV=1	5582	controllerType=0 controllerNumber=1 scan=23490	102.906
02750:2	8	Q.TSFRTGNPTGTY.Q			651.306	2	1301.6	1301.61	0	-6	556	Non	309.88	102.07	102.07	8.18	15	>tr|Q8BTS0|Q8BTS0_MOUSE DEAD (Asp-Glu-Ala-Asp) box polypeptide 5 OS=Mus musculus OX=10090 GN=Ddx5 PE=1 SV=1	5582	controllerType=0 controllerNumber=1 scan=8513	55.3421
11998:2	8	N.FVSAGIQTSF.R			528.768	2	1056.53	1056.54	0	-7.6	549	Non	315.15	79.23	79.23	6.33	15	>tr|Q8BTS0|Q8BTS0_MOUSE DEAD (Asp-Glu-Ala-Asp) box polypeptide 5 OS=Mus musculus OX=10090 GN=Ddx5 PE=1 SV=1	5582	controllerType=0 controllerNumber=1 scan=22235	97.2524
01881:2	8	Q.TSFRTGNPTGTYQ.N			715.336	2	1429.66	1429.67	0	-4.5	556	Non	232.67	126.97	126.97	6.29	15	>tr|Q8BTS0|Q8BTS0_MOUSE DEAD (Asp-Glu-Ala-Asp) box polypeptide 5 OS=Mus musculus OX=10090 GN=Ddx5 PE=1 SV=1	5582	controllerType=0 controllerNumber=1 scan=7349	52.3215
12845:2	8	S.NFVSAGIQTSF.R			585.789	2	1170.57	1170.58	0	-6.3	548	Non	256.24	56.06	56.06	5.21	15	>tr|Q8BTS0|Q8BTS0_MOUSE DEAD (Asp-Glu-Ala-Asp) box polypeptide 5 OS=Mus musculus OX=10090 GN=Ddx5 PE=1 SV=1	5582	controllerType=0 controllerNumber=1 scan=23889	104.619
10374:2	8	Y.SAANYTNGSFGSNF.V			718.803	2	1436.6	1436.61	0	-5.5	536	Non	166.11	76.54	76.54	4.43	15	>tr|Q8BTS0|Q8BTS0_MOUSE DEAD (Asp-Glu-Ala-Asp) box polypeptide 5 OS=Mus musculus OX=10090 GN=Ddx5 PE=1 SV=1	5582	controllerType=0 controllerNumber=1 scan=19479	86.7988
09986:2	8	Y.TFFTPNNIKQV.S			654.847	2	1308.69	1308.69	0	-5.3	443	Non	210.08	58.35	58.35	3.98	15	>tr|Q8BTS0|Q8BTS0_MOUSE DEAD (Asp-Glu-Ala-Asp) box polypeptide 5 OS=Mus musculus OX=10090 GN=Ddx5 PE=1 SV=1	5582	controllerType=0 controllerNumber=1 scan=18910	85.0977
12042:2	8	G.SFGSNFVSAGIQTS.F			701.329	2	1401.65	1401.66	0	-9.7	544	Non	203.91	63.47	63.47	3.17	15	>tr|Q8BTS0|Q8BTS0_MOUSE DEAD (Asp-Glu-Ala-Asp) box polypeptide 5 OS=Mus musculus OX=10090 GN=Ddx5 PE=1 SV=1	5582	controllerType=0 controllerNumber=1 scan=22318	97.6338
00241:2	8	R.TGNPTGTYQNG.Y			555.242	2	1109.48	1109.49	0	-8.5	560	CRagged	199.22	106.46	106.46	3.15	15	>tr|Q8BTS0|Q8BTS0_MOUSE DEAD (Asp-Glu-Ala-Asp) box polypeptide 5 OS=Mus musculus OX=10090 GN=Ddx5 PE=1 SV=1	5582	controllerType=0 controllerNumber=1 scan=4276	38.5155
02310:2	8	T.SFRTGNPTGTY.Q			600.781	2	1200.56	1200.56	0	-7.4	557	Non	203.36	40.87	40.87	2.24	15	>tr|Q8BTS0|Q8BTS0_MOUSE DEAD (Asp-Glu-Ala-Asp) box polypeptide 5 OS=Mus musculus OX=10090 GN=Ddx5 PE=1 SV=1	5582	controllerType=0 controllerNumber=1 scan=7943	53.9761
09228:2	8	P.M[+15.995]IGYPM[+15.995]PTGYSQ.-		M[+16]*2	688.792	2	1376.58	1376.59	0	-6.6	604	Non	120.2	34.46	34.46	2.14	15	>tr|Q8BTS0|Q8BTS0_MOUSE DEAD (Asp-Glu-Ala-Asp) box polypeptide 5 OS=Mus musculus OX=10090 GN=Ddx5 PE=1 SV=1	5582	controllerType=0 controllerNumber=1 scan=16903	75.1852
00880:2	8	S.FRTGNPTGTYQNG.Y			706.826	2	1412.64	1412.66	0	-7.9	558	Non	31.39	9.55	9.55	2.12	15	>tr|Q8BTS0|Q8BTS0_MOUSE DEAD (Asp-Glu-Ala-Asp) box polypeptide 5 OS=Mus musculus OX=10090 GN=Ddx5 PE=1 SV=1	5582	controllerType=0 controllerNumber=1 scan=5836	47.339
10265:2	8	N.YTNGSFGSNFVS.A			640.28	2	1279.55	1279.56	0	-5.4	540	Non	149.38	12.22	12.22	1.81	15	>tr|Q8BTS0|Q8BTS0_MOUSE DEAD (Asp-Glu-Ala-Asp) box polypeptide 5 OS=Mus musculus OX=10090 GN=Ddx5 PE=1 SV=1	5582	controllerType=0 controllerNumber=1 scan=19309	86.2531
08833:2	195	K.NYVNGKTFL.E			528.277	2	1055.55	1055.55	0	-6	115	CRagged	400.62	148.19	148.19	7.17	2	>tr|Q8BKE0|Q8BKE0_MOUSE Proteasome endopeptidase complex (Fragment) OS=Mus musculus OX=10090 GN=Psma2 PE=1 SV=1	1073	controllerType=0 controllerNumber=1 scan=16368	73.847
07590:2	195	N.YVNGKTFL.E			471.255	2	941.504	941.509	0	-5.9	116	Non	236.5	5.42	5.42	2.12	2	>tr|Q8BKE0|Q8BKE0_MOUSE Proteasome endopeptidase complex (Fragment) OS=Mus musculus OX=10090 GN=Psma2 PE=1 SV=1	1073	controllerType=0 controllerNumber=1 scan=14733	70.0129
11063:2	275	R.VYESLISHI.Q			530.784	2	1060.56	1060.57	0	-6.8	586	CRagged	327.83	116.23	116.23	4.93	3	>tr|Q7TT21|Q7TT21_MOUSE Tuberin OS=Mus musculus OX=10090 GN=Tsc2 PE=1 SV=1	3661	controllerType=0 controllerNumber=1 scan=20564	90.4109
08434:2	40	S.HSDLGQLASQGGLG.M			670.331	2	1339.65	1339.66	0	-4.6	2173	Non	341.37	147.89	147.89	8.98	3	>tr|Q7M739|Q7M739_MOUSE Nuclear pore complex-associated intranuclear coiled-coil protein TPR OS=Mus musculus OX=10090 GN=Tpr PE=1 SV=1	2746	controllerType=0 controllerNumber=1 scan=15833	72.5613
07404:2	40	N.AYVETQDQL.L			533.753	2	1066.5	1066.51	0	-5.6	401	Non	366.5	95.24	95.24	7.31	3	>tr|Q7M739|Q7M739_MOUSE Nuclear pore complex-associated intranuclear coiled-coil protein TPR OS=Mus musculus OX=10090 GN=Tpr PE=1 SV=1	2746	controllerType=0 controllerNumber=1 scan=14488	69.4229
04353:2	40	I.HAPPQELGPPVQ.R			635.33	2	1269.65	1269.66	0	-5.3	2082	Non	171.08	47.67	47.67	2.97	3	>tr|Q7M739|Q7M739_MOUSE Nuclear pore complex-associated intranuclear coiled-coil protein TPR OS=Mus musculus OX=10090 GN=Tpr PE=1 SV=1	2746	controllerType=0 controllerNumber=1 scan=10547	60.2168
09351:2	58	G.SQATDFGEALVR.H			647.322	2	1293.64	1293.64	0	-4.5	300	NRagged	478.74	205.31	205.31	8.51	3	>tr|Q6XLQ8|Q6XLQ8_MOUSE Calumenin OS=Mus musculus OX=10090 GN=Calu PE=1 SV=1	5794	controllerType=0 controllerNumber=1 scan=17598	79.6171
12121:2	58	G.SQATDFGEALV.R			569.27	2	1137.53	1137.54	0	-9	300	Non	275.17	71.49	71.49	5.54	3	>tr|Q6XLQ8|Q6XLQ8_MOUSE Calumenin OS=Mus musculus OX=10090 GN=Calu PE=1 SV=1	5794	controllerType=0 controllerNumber=1 scan=22469	98.3146
08626:2	58	A.TDFGEALVR.H			504.259	2	1007.51	1007.52	0	-5.9	303	NRagged	282.39	0.8	0.8	2.19	3	>tr|Q6XLQ8|Q6XLQ8_MOUSE Calumenin OS=Mus musculus OX=10090 GN=Calu PE=1 SV=1	5794	controllerType=0 controllerNumber=1 scan=16080	73.1282
07024:2	75	R.IGAEVYHNL.K			508.261	2	1015.51	1015.52	0	-6.2	116	CRagged	413.4	144.74	144.74	7.17	2	>tr|Q6PHC1|Q6PHC1_MOUSE Alpha-enolase OS=Mus musculus OX=10090 GN=Eno1 PE=1 SV=1	2086	controllerType=0 controllerNumber=1 scan=13991	68.2702
06763:2	75	K.SPDDPSRYITPDQ.L			745.839	2	1490.67	1490.68	0	-3.7	195	CRagged	275.41	75.67	75.67	6.1	2	>tr|Q6PHC1|Q6PHC1_MOUSE Alpha-enolase OS=Mus musculus OX=10090 GN=Eno1 PE=1 SV=1	2086	controllerType=0 controllerNumber=1 scan=13673	67.5818
11560:2	197	G.TQGVAPGPVIGLQ.A			618.847	2	1236.69	1236.69	0	-7.1	896	Non	293.51	87.4	87.4	7.42	1	>tr|Q6PFF0|Q6PFF0_MOUSE SR-related CTD-associated factor 4 OS=Mus musculus OX=10090 GN=Scaf4 PE=1 SV=1	983	controllerType=0 controllerNumber=1 scan=21425	93.7688
09810:2	116	D.SYAAISEVDRL.Q			612.313	2	1223.62	1223.63	0	-6.2	93	Non	427.61	142.23	142.23	8.92	1	>tr|Q6PFA2|Q6PFA2_MOUSE Clathrin light chain OS=Mus musculus OX=10090 GN=Clta PE=1 SV=1	4020	controllerType=0 controllerNumber=1 scan=18646	84.3001
07774:2	327	H.KYLPSSDEF.S			543.259	2	1085.51	1085.52	0	-4.7	188	Non	351.93	37.54	37.54	4.17	1	>tr|Q6P6L6|Q6P6L6_MOUSE Gem (Nuclear organelle) associated protein 4 OS=Mus musculus OX=10090 GN=Gemin4 PE=1 SV=1	1781	controllerType=0 controllerNumber=1 scan=14973	70.5631
02692:2	293	V.SYSNIKNGL.V			498.26	2	995.512	995.516	0	-3.9	449	Non	360.42	66.1	66.1	3.35	4	>tr|Q6NXL1|Q6NXL1_MOUSE Sec24-related gene family, member D (S. cerevisiae) OS=Mus musculus OX=10090 GN=Sec24d PE=1 SV=1	3650	controllerType=0 controllerNumber=1 scan=8433	55.1474
05928:2	293	V.SYSNIKNGLV.K			547.793	2	1094.58	1094.58	0	-4.4	449	Non	243.81	1.54	1.54	1.7	4	>tr|Q6NXL1|Q6NXL1_MOUSE Sec24-related gene family, member D (S. cerevisiae) OS=Mus musculus OX=10090 GN=Sec24d PE=1 SV=1	3650	controllerType=0 controllerNumber=1 scan=12542	64.7115
10210:2	273	T.LYEAVREVL.H			546.305	2	1091.6	1091.61	0	-6	10	Non	275.74	79.78	79.78	4.94	1	>tr|Q5XJF6|Q5XJF6_MOUSE Ribosomal protein OS=Mus musculus OX=10090 GN=Rpl10a PE=1 SV=1	3100	controllerType=0 controllerNumber=1 scan=19227	85.9938
09399:2	289	K.VYYFSKGAL.K			524.277	2	1047.55	1047.55	0	-4.4	284	CRagged	342.15	71.46	71.46	4.74	1	>tr|Q5SWN2|Q5SWN2_MOUSE Replication protein A subunit OS=Mus musculus OX=10090 GN=Rpa1 PE=1 SV=2	25911	controllerType=0 controllerNumber=1 scan=17867	81.3104
10206:2	224	E.AYLNITQHL.Q			536.79	2	1072.57	1072.58	0	-5.7	199	Non	327.68	107.53	107.53	5.7	2	>tr|Q5Q9H5|Q5Q9H5_MOUSE DNA polymerase kappa OS=Mus musculus OX=10090 GN=Polk PE=1 SV=1	570	controllerType=0 controllerNumber=1 scan=19222	85.9835
06672:2	9	R.SSGPYGGGGQYFAKP.R			736.84	2	1472.67	1472.68	0	-4.8	338	CRagged	385.03	209.18	209.18	8.78	6	>tr|Q5EBP8|Q5EBP8_MOUSE Heterogeneous nuclear ribonucleoprotein A1 OS=Mus musculus OX=10090 GN=Hnrnpa1 PE=1 SV=1	27755	controllerType=0 controllerNumber=1 scan=13540	67.2288
10914:2	9	N.FGGGGSYNDFGNY.N			677.766	2	1354.53	1354.53	0	-5.9	307	Non	291.09	154.16	154.16	8.1	6	>tr|Q5EBP8|Q5EBP8_MOUSE Heterogeneous nuclear ribonucleoprotein A1 OS=Mus musculus OX=10090 GN=Hnrnpa1 PE=1 SV=1	27755	controllerType=0 controllerNumber=1 scan=20306	89.4665
06666:2	9	G.RSSGPYGGGGQYF.A			666.798	2	1332.59	1332.6	0	-5.3	337	Non	275.12	122.69	122.69	7.91	6	>tr|Q5EBP8|Q5EBP8_MOUSE Heterogeneous nuclear ribonucleoprotein A1 OS=Mus musculus OX=10090 GN=Hnrnpa1 PE=1 SV=1	27755	controllerType=0 controllerNumber=1 scan=13526	67.1672
03420:2	9	S.SNFGPM[+15.995]KGGNFGG.R		M[+16]	643.28	2	1285.55	1285.56	0	-8.1	324	Non	291.33	133.94	133.94	7.76	6	>tr|Q5EBP8|Q5EBP8_MOUSE Heterogeneous nuclear ribonucleoprotein A1 OS=Mus musculus OX=10090 GN=Hnrnpa1 PE=1 SV=1	27755	controllerType=0 controllerNumber=1 scan=9367	57.3996
09614:2	9	R.SSGPYGGGGQYF.A			588.748	2	1176.49	1176.5	0	-6.1	338	CRagged	288.94	110.5	110.5	7.08	6	>tr|Q5EBP8|Q5EBP8_MOUSE Heterogeneous nuclear ribonucleoprotein A1 OS=Mus musculus OX=10090 GN=Hnrnpa1 PE=1 SV=1	27755	controllerType=0 controllerNumber=1 scan=18342	83.3653
08709:2	9	N.QSSNFGPMK.G			498.23	2	995.453	995.462	0	-8.2	322	NRagged	266.6	7.64	7.64	2.12	6	>tr|Q5EBP8|Q5EBP8_MOUSE Heterogeneous nuclear ribonucleoprotein A1 OS=Mus musculus OX=10090 GN=Hnrnpa1 PE=1 SV=1	27755	controllerType=0 controllerNumber=1 scan=16189	73.3745
12569:2	217	S.SSTQASIEIDSLY.E			707.338	2	1413.67	1413.67	0	-4.6	257	Non	257.02	90.57	90.57	6.82	5	>tr|Q504P4|Q504P4_MOUSE Heat shock cognate 71 kDa protein OS=Mus musculus OX=10090 GN=Hspa8 PE=1 SV=1	810	controllerType=0 controllerNumber=1 scan=23333	102.217
10519:2	217	L.TIEDGIFEVK.S			575.798	2	1150.59	1150.6	0	-8.1	192	NRagged	235.47	28.7	28.7	2.14	5	>tr|Q504P4|Q504P4_MOUSE Heat shock cognate 71 kDa protein OS=Mus musculus OX=10090 GN=Hspa8 PE=1 SV=1	810	controllerType=0 controllerNumber=1 scan=19686	87.4024
06970:2	217	K.VGAERNVLI.F			485.784	2	970.561	970.568	0	-6.9	170	CRagged	233.23	24.31	24.31	1.91	5	>tr|Q504P4|Q504P4_MOUSE Heat shock cognate 71 kDa protein OS=Mus musculus OX=10090 GN=Hspa8 PE=1 SV=1	810	controllerType=0 controllerNumber=1 scan=13925	68.1238
09522:2	194	Q.TYDYAKTIL.S			544.284	2	1087.56	1087.57	0	-5	316	Non	379.07	108.73	108.73	7.45	3	>tr|Q3V117|Q3V117_MOUSE ATP-citrate synthase OS=Mus musculus OX=10090 GN=Acly PE=1 SV=1	4648	controllerType=0 controllerNumber=1 scan=18200	82.9433
11839:2	433	A.TLDVYNPFENR.E			684.328	2	1367.65	1367.66	0	-7.1	37	NRagged	218.42	70.04	70.04	2.37	1	>tr|Q3UXS0|Q3UXS0_MOUSE Secretory carrier-associated membrane protein OS=Mus musculus OX=10090 GN=Scamp3 PE=1 SV=1	5791	controllerType=0 controllerNumber=1 scan=21941	95.9578
02656:3	438	K.TELPSSKDDLNVR.G			491.92	3	1473.75	1473.75	0	-5.8	113	Specific	168.35	82.38	82.38	2.24	3	>tr|Q3URZ6|Q3URZ6_MOUSE AHNAK nucleoprotein 2 OS=Mus musculus OX=10090 GN=Ahnak2 PE=1 SV=1	2640	controllerType=0 controllerNumber=1 scan=8386	55.0408
04249:2	329	H.KYNPVPTSY.A			534.767	2	1068.53	1068.54	0	-9.2	407	Non	297.78	82.56	82.56	4.16	1	>tr|Q3UQW2|Q3UQW2_MOUSE Pleiomorphic adenoma gene-like 1 OS=Mus musculus OX=10090 GN=Plagl1 PE=2 SV=1	4026	controllerType=0 controllerNumber=1 scan=10416	59.9038
09528:2	435	N.SGPEAFHVL.E			478.743	2	956.478	956.484	0	-5.4	542	Non	268.41	54.51	54.51	2.37	1	>tr|Q3UH45|Q3UH45_MOUSE Tectonin beta-propeller repeat-containing 2 OS=Mus musculus OX=10090 GN=Tecpr2 PE=1 SV=1	3876	controllerType=0 controllerNumber=1 scan=18209	82.9669
11448:2	25	T.SPPIGTVTPALKLT.K			697.913	2	1394.82	1394.83	0	-4.7	133	Non	425.08	239.35	239.35	10.25	4	>tr|Q3UDD3|Q3UDD3_MOUSE Polymerase delta-interacting protein 3 OS=Mus musculus OX=10090 GN=Poldip3 PE=1 SV=1	2648	controllerType=0 controllerNumber=1 scan=21237	93.053
08041:2	25	T.SPPIGTVTPALK.L			590.846	2	1180.68	1180.69	0	-7.4	133	NRagged	308.58	121.46	121.46	6.99	4	>tr|Q3UDD3|Q3UDD3_MOUSE Polymerase delta-interacting protein 3 OS=Mus musculus OX=10090 GN=Poldip3 PE=1 SV=1	2648	controllerType=0 controllerNumber=1 scan=15308	71.3027
02559:2	25	K.SSGASVTTQPTEFK.I			720.349	2	1439.69	1439.7	0	-7.3	375	Specific	207.35	126.89	126.89	4.42	4	>tr|Q3UDD3|Q3UDD3_MOUSE Polymerase delta-interacting protein 3 OS=Mus musculus OX=10090 GN=Poldip3 PE=1 SV=1	2648	controllerType=0 controllerNumber=1 scan=8267	54.7892
11629:2	25	F.TSPPIGTVTPALKLT.K			748.438	2	1495.87	1495.87	0	-3.2	132	Non	154.06	51.31	51.31	3.55	4	>tr|Q3UDD3|Q3UDD3_MOUSE Polymerase delta-interacting protein 3 OS=Mus musculus OX=10090 GN=Poldip3 PE=1 SV=1	2648	controllerType=0 controllerNumber=1 scan=21556	94.351
08766:2	248	K.TYNPAFSRL.E			534.774	2	1068.54	1068.55	0	-5.2	166	CRagged	319.01	111.52	111.52	5.32	2	>tr|Q3U3W2|Q3U3W2_MOUSE Transmembrane protein 181A OS=Mus musculus OX=10090 GN=Tmem181a PE=1 SV=1	1820	controllerType=0 controllerNumber=1 scan=16272	73.5933
07085:2	215	R.SYENFIGNTH.Y			591.261	2	1181.51	1181.52	0	-6.1	1024	CRagged	392.75	179.44	179.44	7.2	2	>tr|Q3U0X6|Q3U0X6_MOUSE Zinc finger protein 217 OS=Mus musculus OX=10090 GN=Zfp217 PE=1 SV=1	26862	controllerType=0 controllerNumber=1 scan=14067	68.4417
03187:2	353	C.TVAVEESIANH.Y			585.29	2	1169.57	1169.58	0	-6.4	138	Non	257.7	59.17	59.17	3.42	1	>tr|Q3TYT1|Q3TYT1_MOUSE 5-demethoxyubiquinone hydroxylase, mitochondrial OS=Mus musculus OX=10090 GN=Coq7 PE=1 SV=1	22	controllerType=0 controllerNumber=1 scan=9078	56.7279
09656:2	119	P.TGLSASDPGTATF.-			612.788	2	1224.57	1224.57	0	-5.3	379	Non	390.07	161.13	161.13	8.61	3	>tr|Q3TYK3|Q3TYK3_MOUSE Nuclear factor 1 OS=Mus musculus OX=10090 GN=Nfix PE=1 SV=1	1153	controllerType=0 controllerNumber=1 scan=18407	83.5604
04260:2	119	H.HGQDSLKEFVQ.F			644.317	2	1287.63	1287.63	0	-5.4	345	Non	178.53	21.57	21.57	2.13	3	>tr|Q3TYK3|Q3TYK3_MOUSE Nuclear factor 1 OS=Mus musculus OX=10090 GN=Nfix PE=1 SV=1	1153	controllerType=0 controllerNumber=1 scan=10429	59.9312
07655:2	154	S.SFNEAM[+15.995]TQI.R		M[+16]	528.734	2	1056.46	1056.47	0	-5.1	575	Non	371.5	117.2	117.2	7.39	1	>tr|Q3TTL2|Q3TTL2_MOUSE Kinesin-like protein OS=Mus musculus OX=10090 GN=Kif2c PE=1 SV=1	4868	controllerType=0 controllerNumber=1 scan=14816	70.2046
11144:2	301	L.LYDPVISKL.A			524.305	2	1047.6	1047.61	0	-5.6	166	Non	332.72	67.2	67.2	4.53	1	>tr|Q3TJY1|Q3TJY1_MOUSE Microspherule protein 1 OS=Mus musculus OX=10090 GN=Mcrs1 PE=1 SV=1	28714	controllerType=0 controllerNumber=1 scan=20701	90.9429
11198:2	310	G.FFSTIRTEL.Y			557.297	2	1113.59	1113.59	0	-7.3	163	Non	283.34	69.79	69.79	4.35	1	>tr|Q3TJI8|Q3TJI8_MOUSE Corticosteroid 11-beta-dehydrogenase isozyme 1 OS=Mus musculus OX=10090 GN=Hsd11b1 PE=1 SV=1	1182	controllerType=0 controllerNumber=1 scan=20807	91.3828
11866:2	161	Y.SPQYISYIPQIH.M			723.372	2	1445.74	1445.74	0	-3.4	624	Non	286.86	100.42	100.42	6.83	5	>tr|Q3TGG2|Q3TGG2_MOUSE Ataxin-2-like protein OS=Mus musculus OX=10090 GN=Atxn2l PE=1 SV=1	3053	controllerType=0 controllerNumber=1 scan=21982	96.0954
11460:2	161	A.TPYSSYIPYNPQ.Q			715.331	2	1429.65	1429.66	0	-6.3	700	Non	178.04	43.4	43.4	3.06	5	>tr|Q3TGG2|Q3TGG2_MOUSE Ataxin-2-like protein OS=Mus musculus OX=10090 GN=Atxn2l PE=1 SV=1	3053	controllerType=0 controllerNumber=1 scan=21256	93.1111
05625:2	161	S.TPQYPAAEQPTPQA.L			749.858	2	1498.71	1498.72	0	-5.1	757	Non	104.47	14.65	14.65	2.06	5	>tr|Q3TGG2|Q3TGG2_MOUSE Ataxin-2-like protein OS=Mus musculus OX=10090 GN=Atxn2l PE=1 SV=1	3053	controllerType=0 controllerNumber=1 scan=12179	63.9532
08894:2	111	N.TYITSVSRL.Y			520.29	2	1039.57	1039.58	0	-6	240	Non	387.53	161.46	161.46	8.33	2	>tr|Q3TEE9|Q3TEE9_MOUSE Oxidative stress-induced growth inhibitor family member 2 OS=Mus musculus OX=10090 GN=Osgin2 PE=2 SV=1	5920	controllerType=0 controllerNumber=1 scan=16442	74.0147
10034:2	111	N.TYITSVSRLY.R			601.821	2	1202.63	1202.64	0	-6.3	240	Non	222.82	11.27	11.27	2.15	2	>tr|Q3TEE9|Q3TEE9_MOUSE Oxidative stress-induced growth inhibitor family member 2 OS=Mus musculus OX=10090 GN=Osgin2 PE=2 SV=1	5920	controllerType=0 controllerNumber=1 scan=18977	85.2778
09978:2	423	D.SYVAIINKSI.R			554.321	2	1107.63	1107.64	0	-5.9	662	Non	289.24	46.14	46.14	2.5	1	>tr|Q3TCR7|Q3TCR7_MOUSE Dynamin-2 OS=Mus musculus OX=10090 GN=Dnm2 PE=1 SV=1	14	controllerType=0 controllerNumber=1 scan=18899	85.0636
07711:2	222	K.TSNSYTAGGLFK.E			623.305	2	1245.6	1245.61	0	-7.1	557	Specific	372.68	205.26	205.26	5.72	4	>tr|Q3TB04|Q3TB04_MOUSE FERM domain-containing protein 4A OS=Mus musculus OX=10090 GN=Frmd4a PE=1 SV=1	5775	controllerType=0 controllerNumber=1 scan=14896	70.4128
06692:2	212	M.TDVPVDPGVVH.R			567.79	2	1134.57	1134.58	0	-4.6	23	Non	285.79	77.81	77.81	7.24	1	>tr|Q3TAI4|Q3TAI4_MOUSE Tumor protein D52-like 2, isoform CRA_c OS=Mus musculus OX=10090 GN=Tpd52l2 PE=1 SV=1	1611	controllerType=0 controllerNumber=1 scan=13573	67.332
06330:2	453	T.NGPRITNAF.S			495.26	2	989.512	989.516	0	-4.5	160	Non	277.1	56.09	56.09	1.67	2	>tr|Q3LR78|Q3LR78_MOUSE CtBP-interacting BTB zinc finger protein OS=Mus musculus OX=10090 GN=Zbtb38 PE=1 SV=1	4567	controllerType=0 controllerNumber=1 scan=13047	65.8472
05818:2	173	G.SRPAQSWTAVTPQ.Q			714.862	2	1428.72	1428.72	0	-4.4	363	Non	267.25	79.81	79.81	7.69	1	>tr|Q0VAW6|Q0VAW6_MOUSE RIKEN cDNA 8030462N17 gene OS=Mus musculus OX=10090 GN=8030462N17Rik PE=1 SV=1	1803	controllerType=0 controllerNumber=1 scan=12406	64.4209
11489:2	485	W.GESLTPPVLT.S			507.276	2	1013.54	1013.55	0	-7.1	3768	Non	283.63	66.56	66.56	1.49	2	>tr|O35452|O35452_MOUSE Tenascin X OS=Mus musculus OX=10090 GN=Tnxb PE=1 SV=1	4987	controllerType=0 controllerNumber=1 scan=21305	93.2967
09330:2	190	L.KFTETLTNI.W			533.79	2	1066.57	1066.58	0	-5.2	1987	Non	388.34	93.16	93.16	7.52	2	>tr|L7N451|L7N451_MOUSE Interferon-induced very large GTPase 1 OS=Mus musculus OX=10090 GN=Gvin1 PE=1 SV=1	5024	controllerType=0 controllerNumber=1 scan=17383	78.1283
10871:2	252	K.VGADLTHVF.C			479.75	2	958.493	958.499	0	-6.9	117	CRagged	333.58	139.05	139.05	5.3	1	>tr|K3W4M4|K3W4M4_MOUSE ATP-dependent (S)-NAD(P)H-hydrate dehydratase OS=Mus musculus OX=10090 GN=Naxd PE=1 SV=1	14863	controllerType=0 controllerNumber=1 scan=20239	89.2558
09895:2	346	G.SYIKDLSVV.H			512.287	2	1023.57	1023.57	0	-5.8	34	Non	270.82	46.38	46.38	3.79	1	>tr|J3QPC9|J3QPC9_MOUSE CTD nuclear envelope phosphatase 1 (Fragment) OS=Mus musculus OX=10090 GN=Ctdnep1 PE=1 SV=1	25548	controllerType=0 controllerNumber=1 scan=18781	84.7361
09144:2	253	H.THVNDGTEFGGSIY.Q			748.833	2	1496.66	1496.67	0	-4.4	183	Non	198.9	116.97	116.97	4.48	2	>tr|J3QMG3|J3QMG3_MOUSE Voltage-dependent anion-selective channel protein 3 OS=Mus musculus OX=10090 GN=Vdac3 PE=1 SV=1	12743	controllerType=0 controllerNumber=1 scan=16787	74.8943
09136:2	253	T.HVNDGTEFGGSIY.Q			698.309	2	1395.61	1395.62	0	-4.7	184	Non	184.2	54.29	54.29	1.77	2	>tr|J3QMG3|J3QMG3_MOUSE Voltage-dependent anion-selective channel protein 3 OS=Mus musculus OX=10090 GN=Vdac3 PE=1 SV=1	12743	controllerType=0 controllerNumber=1 scan=16776	74.8721
06423:2	270	L.SYYPTSSTSSV.S			589.761	2	1178.52	1178.52	0	-4.8	145	Non	252.77	94.47	94.47	4.99	1	>tr|I7HJS1|I7HJS1_MOUSE Emerin OS=Mus musculus OX=10090 GN=Emd PE=1 SV=1	3335	controllerType=0 controllerNumber=1 scan=13165	66.0946
04812:2	277	I.EYVHTKNFI.H			575.795	2	1150.58	1150.59	0	-4.8	125	Non	326.49	78.64	78.64	4.88	1	>tr|H7BXB1|H7BXB1_MOUSE Casein kinase I isoform alpha OS=Mus musculus OX=10090 GN=Csnk1a1 PE=1 SV=1	8772	controllerType=0 controllerNumber=1 scan=11129	61.5513
11712:2	49	R.TTDAEFHTFFNE.K			729.808	2	1458.61	1458.62	0	-5.7	311	CRagged	378.2	174.11	174.11	8.28	3	>tr|H7BX99|H7BX99_MOUSE Prothrombin OS=Mus musculus OX=10090 GN=F2 PE=1 SV=1	31158	controllerType=0 controllerNumber=1 scan=21725	95.1309
11589:2	49	R.TTDAEFHTFFN.E			665.286	2	1329.57	1329.57	0	-7.2	311	CRagged	320.55	110.01	110.01	6.35	3	>tr|H7BX99|H7BX99_MOUSE Prothrombin OS=Mus musculus OX=10090 GN=F2 PE=1 SV=1	31158	controllerType=0 controllerNumber=1 scan=21477	93.9953
07456:2	49	R.TTDAEFHTF.F			534.733	2	1068.46	1068.46	0	-4.1	311	CRagged	314.52	41.76	41.76	2.25	3	>tr|H7BX99|H7BX99_MOUSE Prothrombin OS=Mus musculus OX=10090 GN=F2 PE=1 SV=1	31158	controllerType=0 controllerNumber=1 scan=14562	69.6271
12907:2	358	R.TVFSGSVSIP.S			497.262	2	993.517	993.525	0	-7.7	1512	CRagged	401.88	48.57	48.57	3.36	1	>tr|H7BX44|H7BX44_MOUSE Non-specific serine/threonine protein kinase OS=Mus musculus OX=10090 GN=Cdc42bpa PE=1 SV=1	7226	controllerType=0 controllerNumber=1 scan=23986	104.929
12279:2	265	P.SYFEIPTKEF.Q			630.807	2	1260.61	1260.61	0	-6.6	238	Non	280.05	115.26	115.26	5.09	2	>tr|H7BX26|H7BX26_MOUSE Centrosomal protein of 170 kDa OS=Mus musculus OX=10090 GN=Cep170 PE=1 SV=1	5061	controllerType=0 controllerNumber=1 scan=22768	99.5996
10917:2	18	V.PDSSGPERILSI.S			635.832	2	1270.66	1270.66	0	-5.9	10	Non	526.33	216.32	216.32	9.59	6	>tr|H3BLL4|H3BLL4_MOUSE Heterogeneous nuclear ribonucleoprotein K OS=Mus musculus OX=10090 GN=Hnrnpk PE=1 SV=1	10306	controllerType=0 controllerNumber=1 scan=20312	89.492
11323:2	18	S.VPDSSGPERILSI.S			685.365	2	1369.72	1369.73	0	-7.5	9	Non	483.22	217.64	217.64	9.04	6	>tr|H3BLL4|H3BLL4_MOUSE Heterogeneous nuclear ribonucleoprotein K OS=Mus musculus OX=10090 GN=Hnrnpk PE=1 SV=1	10306	controllerType=0 controllerNumber=1 scan=21036	92.3336
11466:2	18	P.DSSGPERILSI.S			587.307	2	1173.61	1173.61	0	-3.6	11	Non	363.45	41.44	41.44	5.36	6	>tr|H3BLL4|H3BLL4_MOUSE Heterogeneous nuclear ribonucleoprotein K OS=Mus musculus OX=10090 GN=Hnrnpk PE=1 SV=1	10306	controllerType=0 controllerNumber=1 scan=21267	93.155
09418:2	18	S.SGPERILSI.S			486.277	2	971.547	971.552	0	-4.8	13	Non	333.71	22.3	22.3	4.65	6	>tr|H3BLL4|H3BLL4_MOUSE Heterogeneous nuclear ribonucleoprotein K OS=Mus musculus OX=10090 GN=Hnrnpk PE=1 SV=1	10306	controllerType=0 controllerNumber=1 scan=17961	81.8852
09611:2	18	D.SSGPERILSI.S			529.793	2	1058.58	1058.58	0	-4.6	12	Non	248.2	15.43	15.43	2.26	6	>tr|H3BLL4|H3BLL4_MOUSE Heterogeneous nuclear ribonucleoprotein K OS=Mus musculus OX=10090 GN=Hnrnpk PE=1 SV=1	10306	controllerType=0 controllerNumber=1 scan=18339	83.3581
02711:2	47	T.SSASLSSPALAKGTQ.R			702.867	2	1404.73	1404.73	0	-3.8	587	Non	324.85	145.68	145.68	8.05	5	>tr|H3BL37|H3BL37_MOUSE Treacle protein OS=Mus musculus OX=10090 GN=Tcof1 PE=1 SV=1	21830	controllerType=0 controllerNumber=1 scan=8457	55.1974
02986:2	47	R.TSVTTPAALSR.A			552.303	2	1103.6	1103.61	0	-5.5	941	Specific	399.59	186.78	186.78	7.31	5	>tr|H3BL37|H3BL37_MOUSE Treacle protein OS=Mus musculus OX=10090 GN=Tcof1 PE=1 SV=1	21830	controllerType=0 controllerNumber=1 scan=8824	56.1134
10026:2	47	S.GYM[+15.995]TPGLTV.A		M[+16]	477.731	2	954.455	954.46	0	-5.7	1085	Non	266.58	13.13	13.13	2.26	5	>tr|H3BL37|H3BL37_MOUSE Treacle protein OS=Mus musculus OX=10090 GN=Tcof1 PE=1 SV=1	21830	controllerType=0 controllerNumber=1 scan=18967	85.2537
05522:2	466	V.SYLDGKGNL.A			483.746	2	966.484	966.489	0	-5.4	139	Non	277.39	37.09	37.09	1.67	1	>tr|H3BK01|H3BK01_MOUSE TAF6-like RNA polymerase II p300/CBP-associated factor-associated factor 65 kDa subunit 6L OS=Mus musculus OX=10090 GN=Taf6l PE=1 SV=1	2193	controllerType=0 controllerNumber=1 scan=12046	63.6415
03122:2	471	E.AYEEVRNQL.E			561.278	2	1121.55	1121.56	0	-8	400	Non	279.97	63.39	63.39	1.65	2	>tr|H3BJG4|H3BJG4_MOUSE Thyroid hormone receptor interactor 11 (Fragment) OS=Mus musculus OX=10090 GN=Trip11 PE=1 SV=1	20042	controllerType=0 controllerNumber=1 scan=8996	56.5286
05784:2	350	R.NNTALQSVSLR.S			601.823	2	1202.64	1202.65	0	-7.5	86	Specific	246.06	106.45	106.45	2.98	2	>tr|H3BJ40|H3BJ40_MOUSE Rho guanine nucleotide exchange factor 2 OS=Mus musculus OX=10090 GN=Arhgef2 PE=1 SV=1	3420	controllerType=0 controllerNumber=1 scan=12366	64.3363
06499:2	350	G.HFNDESPLGLR.Q			642.815	2	1284.62	1284.63	0	-8.1	143	NRagged	226.57	67.89	67.89	1.75	2	>tr|H3BJ40|H3BJ40_MOUSE Rho guanine nucleotide exchange factor 2 OS=Mus musculus OX=10090 GN=Arhgef2 PE=1 SV=1	3420	controllerType=0 controllerNumber=1 scan=13257	66.2991
08135:2	32	G.SAM[+15.995]IGGFAGRIGASN.M		M[+16]	712.847	2	1424.69	1424.69	0	-6.4	367	Non	293.72	171.08	171.08	8.62	4	>tr|G8JL68|G8JL68_MOUSE Myelin expression factor 2 (Fragment) OS=Mus musculus OX=10090 GN=Myef2 PE=1 SV=1	14176	controllerType=0 controllerNumber=1 scan=15437	71.622
09958:2	32	R.SIDVDRGFLS.G			554.782	2	1108.56	1108.56	0	-5.7	428	CRagged	362.46	93.84	93.84	6.53	4	>tr|G8JL68|G8JL68_MOUSE Myelin expression factor 2 (Fragment) OS=Mus musculus OX=10090 GN=Myef2 PE=1 SV=1	14176	controllerType=0 controllerNumber=1 scan=18869	84.9746
10918:2	32	R.SIDVDRGFL.S			511.266	2	1021.53	1021.53	0	-5.6	428	CRagged	351.96	52.2	52.2	4.96	4	>tr|G8JL68|G8JL68_MOUSE Myelin expression factor 2 (Fragment) OS=Mus musculus OX=10090 GN=Myef2 PE=1 SV=1	14176	controllerType=0 controllerNumber=1 scan=20313	89.4972
03073:2	120	H.HIAPPGSSSAGSLG.R			619.309	2	1237.61	1237.62	0	-5.1	2230	Non	320.73	122.13	122.13	8.75	1	>tr|G5E8J0|G5E8J0_MOUSE Neurogenic locus notch homolog protein 2 OS=Mus musculus OX=10090 GN=Notch2 PE=1 SV=1	28666	controllerType=0 controllerNumber=1 scan=8930	56.3492
10826:2	146	V.SVSALTLATETVR.S			674.373	2	1347.74	1347.75	0	-7.1	485	NRagged	427.49	193.11	193.11	7.9	2	>tr|G5E839|G5E839_MOUSE T-complex protein 1 subunit delta OS=Mus musculus OX=10090 GN=Cct4 PE=1 SV=1	6749	controllerType=0 controllerNumber=1 scan=20160	88.9704
13139:2	146	A.PTAGPGSRGK.S			464.251	2	927.494	927.501	0	-6.7	12	NRagged	246.21	53.05	53.05	2.18	2	>tr|G5E839|G5E839_MOUSE T-complex protein 1 subunit delta OS=Mus musculus OX=10090 GN=Cct4 PE=1 SV=1	6749	controllerType=0 controllerNumber=1 scan=24272	105.494
11763:2	506	R.TPGAPGPSSPQ.M			498.241	2	995.474	995.479	0	-5.3	1030	CRagged	218.06	74.64	74.64	1.34	2	>tr|G3XA20|G3XA20_MOUSE Glutamate receptor-interacting protein 2 OS=Mus musculus OX=10090 GN=Grip2 PE=1 SV=1	1880	controllerType=0 controllerNumber=1 scan=21814	95.4581
05162:2	220	K.SQGLSQLYHN.Q			573.778	2	1146.55	1146.55	0	-4.8	431	CRagged	397.23	95.78	95.78	5.74	3	>tr|G3XA17|G3XA17_MOUSE Eukaryotic translation initiation factor 4 gamma 2 OS=Mus musculus OX=10090 GN=Eif4g2 PE=1 SV=1	3093	controllerType=0 controllerNumber=1 scan=11573	62.5303
10076:2	24	K.FYNQVSTPLLR.N			669.361	2	1337.71	1337.72	0	-4.7	493	Specific	352.49	140.97	140.97	7.02	5	>tr|G3X977|G3X977_MOUSE Inter-alpha trypsin inhibitor, heavy chain 2 OS=Mus musculus OX=10090 GN=Itih2 PE=1 SV=1	5871	controllerType=0 controllerNumber=1 scan=19038	85.4628
13023:2	24	K.FYNQVSTPLL.R			591.309	2	1181.61	1181.62	0	-8.3	493	CRagged	435.82	99.54	99.54	6.57	5	>tr|G3X977|G3X977_MOUSE Inter-alpha trypsin inhibitor, heavy chain 2 OS=Mus musculus OX=10090 GN=Itih2 PE=1 SV=1	5871	controllerType=0 controllerNumber=1 scan=24119	105.161
09089:2	24	K.KFYNQVSTPL.L			598.816	2	1196.62	1196.63	0	-5.9	492	CRagged	336.39	94.17	94.17	6.33	5	>tr|G3X977|G3X977_MOUSE Inter-alpha trypsin inhibitor, heavy chain 2 OS=Mus musculus OX=10090 GN=Itih2 PE=1 SV=1	5871	controllerType=0 controllerNumber=1 scan=16711	74.7089
10880:2	24	K.FYNQVSTPL.L			534.769	2	1068.53	1068.54	0	-5.8	493	CRagged	315.05	38.2	38.2	4.58	5	>tr|G3X977|G3X977_MOUSE Inter-alpha trypsin inhibitor, heavy chain 2 OS=Mus musculus OX=10090 GN=Itih2 PE=1 SV=1	5871	controllerType=0 controllerNumber=1 scan=20254	89.3058
11232:2	24	K.KFYNQVSTPLL.R			655.358	2	1309.71	1309.72	0	-5	492	CRagged	215.71	25.77	25.77	2.14	5	>tr|G3X977|G3X977_MOUSE Inter-alpha trypsin inhibitor, heavy chain 2 OS=Mus musculus OX=10090 GN=Itih2 PE=1 SV=1	5871	controllerType=0 controllerNumber=1 scan=20875	91.6773
09322:2	258	H.KYLTVKDYL.K			571.824	2	1142.64	1142.65	0	-3.5	1015	Non	356.02	95.32	95.32	4.38	2	>tr|G3X963|G3X963_MOUSE ATPase family AAA domain-containing protein 2 OS=Mus musculus OX=10090 GN=Atad2 PE=1 SV=1	26661	controllerType=0 controllerNumber=1 scan=17259	77.2413
09458:2	258	T.AYAIIKEEL.D			525.295	2	1049.58	1049.59	0	-4.2	1058	Non	287.14	15.4	15.4	1.81	2	>tr|G3X963|G3X963_MOUSE ATPase family AAA domain-containing protein 2 OS=Mus musculus OX=10090 GN=Atad2 PE=1 SV=1	26661	controllerType=0 controllerNumber=1 scan=18072	82.4329
10315:2	218	R.TGPLRSGPDFL.R			580.306	2	1159.6	1159.61	0	-5.3	303	CRagged	308.56	110.58	110.58	7.14	1	>tr|G3X960|G3X960_MOUSE MCG5982 OS=Mus musculus OX=10090 GN=Syde1 PE=1 SV=1	4297	controllerType=0 controllerNumber=1 scan=19389	86.5182
11311:2	92	Q.DYIITPHAL.P			521.778	2	1042.55	1042.56	0	-7.9	531	Non	394.23	54.4	54.4	6.11	4	>tr|G3X934|G3X934_MOUSE MCG115964 OS=Mus musculus OX=10090 GN=Wdr70 PE=1 SV=1	5217	controllerType=0 controllerNumber=1 scan=21013	92.2274
04556:2	92	G.THGGTLSSYIVK.N			631.836	2	1262.67	1262.67	0	-6.7	582	NRagged	258.15	101.33	101.33	5.86	4	>tr|G3X934|G3X934_MOUSE MCG115964 OS=Mus musculus OX=10090 GN=Wdr70 PE=1 SV=1	5217	controllerType=0 controllerNumber=1 scan=10797	60.771
09348:2	125	R.TYTWQIPER.S			597.297	2	1193.59	1193.59	0	-6.8	850	Specific	582.4	317.49	317.49	7.6	3	>tr|G3X8Q5|G3X8Q5_MOUSE Ceruloplasmin OS=Mus musculus OX=10090 GN=Cp PE=1 SV=1	2327	controllerType=0 controllerNumber=1 scan=17590	79.5734
12445:2	125	K.TESSTVVPTLPGEV.R			708.361	2	1415.71	1415.73	0	-8.2	835	CRagged	198.24	45.06	45.06	2.76	3	>tr|G3X8Q5|G3X8Q5_MOUSE Ceruloplasmin OS=Mus musculus OX=10090 GN=Cp PE=1 SV=1	2327	controllerType=0 controllerNumber=1 scan=23110	101.298
06685:2	125	Y.TWQIPER.S			465.243	2	929.479	929.484	0	-4.9	852	NRagged	357.69	32.57	32.57	2.25	3	>tr|G3X8Q5|G3X8Q5_MOUSE Ceruloplasmin OS=Mus musculus OX=10090 GN=Cp PE=1 SV=1	2327	controllerType=0 controllerNumber=1 scan=13564	67.3092
09537:2	492	T.TQAISQETLQNLQ.L			737.377	2	1473.75	1473.75	0	-4.7	426	Non	201.97	40.11	40.11	1.42	1	>tr|G3X8Q0|G3X8Q0_MOUSE Trans-acting transcription factor 1 OS=Mus musculus OX=10090 GN=Sp1 PE=1 SV=1	795	controllerType=0 controllerNumber=1 scan=18223	83.0071
09397:2	117	N.DYLADKSYI.E			544.266	2	1087.53	1087.53	0	-5	14	Non	416.21	181.93	181.93	7.86	3	>tr|G3UZ47|G3UZ47_MOUSE Eukaryotic translation elongation factor 1 beta 2 (Fragment) OS=Mus musculus OX=10090 GN=Eef1b2 PE=1 SV=1	10571	controllerType=0 controllerNumber=1 scan=17862	81.2875
07375:2	117	E.GYVPSQADV.A			468.224	2	935.441	935.447	0	-6.1	24	Non	325.08	30.92	30.92	3.08	3	>tr|G3UZ47|G3UZ47_MOUSE Eukaryotic translation elongation factor 1 beta 2 (Fragment) OS=Mus musculus OX=10090 GN=Eef1b2 PE=1 SV=1	10571	controllerType=0 controllerNumber=1 scan=14449	69.3306
06793:2	117	D.YLADKSYI.E			486.752	2	972.498	972.504	0	-6.2	15	Non	271.53	32.08	32.08	2.19	3	>tr|G3UZ47|G3UZ47_MOUSE Eukaryotic translation elongation factor 1 beta 2 (Fragment) OS=Mus musculus OX=10090 GN=Eef1b2 PE=1 SV=1	10571	controllerType=0 controllerNumber=1 scan=13708	67.6553
03439:2	232	R.TANLGAGAAQPLR.D			620.338	2	1239.67	1239.68	0	-8.6	202	Specific	353.95	164.41	164.41	5.54	1	>tr|G3UWN5|G3UWN5_MOUSE Apolipoprotein E (Fragment) OS=Mus musculus OX=10090 GN=Apoe PE=1 SV=1	18281	controllerType=0 controllerNumber=1 scan=9391	57.4581
08620:2	174	F.TINSLQNAPEAFK.A			716.872	2	1432.74	1432.74	0	-4.8	147	NRagged	313.52	154.91	154.91	7.68	1	>tr|G3UVX2|G3UVX2_MOUSE ELK3, member of ETS oncogene family, isoform CRA_a OS=Mus musculus OX=10090 GN=Elk3 PE=1 SV=1	5138	controllerType=0 controllerNumber=1 scan=16070	73.0954
09472:2	415	G.FYITSRTQF.N			581.796	2	1162.58	1162.59	0	-4.4	214	Non	290.34	66.93	66.93	2.57	1	>tr|F8WI90|F8WI90_MOUSE Tyrosine-protein kinase OS=Mus musculus OX=10090 GN=Src PE=1 SV=1	4457	controllerType=0 controllerNumber=1 scan=18102	82.5591
04835:2	206	M.SYNPAENAV.L			482.72	2	964.433	964.437	0	-3.8	369	Non	280.2	93.61	93.61	5.24	3	>tr|F8WHL2|F8WHL2_MOUSE Coatomer subunit alpha OS=Mus musculus OX=10090 GN=Copa PE=1 SV=1	12282	controllerType=0 controllerNumber=1 scan=11159	61.6216
09815:2	206	H.DGPVRGIDF.H			488.246	2	975.485	975.489	0	-4.3	51	Non	316.66	35.33	35.33	4.4	3	>tr|F8WHL2|F8WHL2_MOUSE Coatomer subunit alpha OS=Mus musculus OX=10090 GN=Copa PE=1 SV=1	12282	controllerType=0 controllerNumber=1 scan=18656	84.34
10571:2	396	T.GYSPQLQGL.S			481.748	2	962.488	962.494	0	-6.5	161	Non	273.18	7.36	7.36	2.18	2	>tr|F8WGT2|F8WGT2_MOUSE Transmembrane protein 209 OS=Mus musculus OX=10090 GN=Tmem209 PE=1 SV=1	12392	controllerType=0 controllerNumber=1 scan=19763	87.6379
10550:2	274	Q.SYSSLIRNL.E			526.787	2	1052.57	1052.57	0	-6.2	433	Non	288.51	91.89	91.89	4.94	1	>tr|F8WGM5|F8WGM5_MOUSE Syntaxin-binding protein 2 (Fragment) OS=Mus musculus OX=10090 GN=Stxbp2 PE=1 SV=1	9680	controllerType=0 controllerNumber=1 scan=19732	87.5431
09800:2	359	G.SAVISLEGKPL.S			557.326	2	1113.64	1113.65	0	-5.9	156	Non	293.58	21.73	21.73	3.33	2	>tr|F8WGL3|F8WGL3_MOUSE Cofilin-1 OS=Mus musculus OX=10090 GN=Cfl1 PE=1 SV=1	6047	controllerType=0 controllerNumber=1 scan=18630	84.2547
06749:2	291	Y.TQEEIEAFPR.V			610.298	2	1219.59	1219.6	0	-5.9	85	NRagged	320.5	90.58	90.58	4.68	1	>tr|F7CXG9|F7CXG9_MOUSE 39S ribosomal protein L13, mitochondrial (Fragment) OS=Mus musculus OX=10090 GN=Mrpl13 PE=1 SV=1	22706	controllerType=0 controllerNumber=1 scan=13655	67.5423
04899:2	196	G.SQPIAQQPLQ.Q			555.298	2	1109.59	1109.59	0	-5.1	494	Non	337.61	81.51	81.51	7.43	1	>tr|F7B5B5|F7B5B5_MOUSE Heterogeneous nuclear ribonucleoprotein R OS=Mus musculus OX=10090 GN=Hnrnpr PE=1 SV=1	1798	controllerType=0 controllerNumber=1 scan=11245	61.8229
11010:2	383	L.SFSPEEFPTLK.A			641.318	2	1281.63	1281.64	0	-5.1	94	NRagged	309.14	17.01	17.01	2.85	3	>tr|F7AYW2|F7AYW2_MOUSE Protein PRRC2B (Fragment) OS=Mus musculus OX=10090 GN=Prrc2b PE=1 SV=1	19736	controllerType=0 controllerNumber=1 scan=20481	90.1276
07855:2	316	V.VFVAGATRI.S			467.277	2	933.546	933.552	0	-5.5	1169	Non	335.69	59.88	59.88	4.36	1	>tr|F7AC58|F7AC58_MOUSE Piezo-type mechanosensitive ion channel component OS=Mus musculus OX=10090 GN=Piezo1 PE=1 SV=2	9286	controllerType=0 controllerNumber=1 scan=15081	70.8164
07228:2	429	R.FSQVLSALGV.D			510.787	2	1020.57	1020.57	0	-5.1	84	CRagged	333.48	18.27	18.27	2.39	1	>tr|F7A1F0|F7A1F0_MOUSE Testis-specific 10-interacting protein OS=Mus musculus OX=10090 GN=Tsga10ip PE=4 SV=1	13997	controllerType=0 controllerNumber=1 scan=14263	68.9345
08690:2	17	K.TM[+15.995]STSDPAEVLIK.N		M[+16]	704.352	2	1407.7	1407.7	0	-4.9	283	Specific	652.94	404.37	404.37	11.39	4	>tr|F6ZSG0|F6ZSG0_MOUSE Protein LYRIC (Fragment) OS=Mus musculus OX=10090 GN=Mtdh PE=1 SV=1	26118	controllerType=0 controllerNumber=1 scan=16164	73.3194
09466:2	17	K.TMSTSDPAEVLIK.N			696.354	2	1391.7	1391.71	0	-5.2	283	Specific	529.61	326.21	326.21	8.49	4	>tr|F6ZSG0|F6ZSG0_MOUSE Protein LYRIC (Fragment) OS=Mus musculus OX=10090 GN=Mtdh PE=1 SV=1	26118	controllerType=0 controllerNumber=1 scan=18088	82.4992
01993:2	17	D.PAEVLIKNSQPVK.T			711.916	2	1422.82	1422.83	0	-5.1	289	NRagged	126.25	68.2	68.2	4.04	4	>tr|F6ZSG0|F6ZSG0_MOUSE Protein LYRIC (Fragment) OS=Mus musculus OX=10090 GN=Mtdh PE=1 SV=1	26118	controllerType=0 controllerNumber=1 scan=7517	52.8309
08327:2	17	M.STSDPAEVLIK.N			580.309	2	1159.61	1159.62	0	-7.9	285	NRagged	358.16	19.07	19.07	3.71	4	>tr|F6ZSG0|F6ZSG0_MOUSE Protein LYRIC (Fragment) OS=Mus musculus OX=10090 GN=Mtdh PE=1 SV=1	26118	controllerType=0 controllerNumber=1 scan=15692	72.2198
03176:2	216	W.TYNPAAVSKV.A			525.282	2	1049.56	1049.56	0	-5.6	26	Non	303.84	72.73	72.73	7.18	1	>tr|F6ZBL2|F6ZBL2_MOUSE E3 ubiquitin-protein ligase MIB1 (Fragment) OS=Mus musculus OX=10090 GN=Mib1 PE=1 SV=1	7010	controllerType=0 controllerNumber=1 scan=9064	56.6896
10586:2	412	R.AYLPPKELL.K			522.307	2	1043.61	1043.61	0	-6.2	207	CRagged	271.15	38	38	2.55	2	>tr|F6Z7L1|F6Z7L1_MOUSE Trinucleotide repeat-containing gene 18 protein (Fragment) OS=Mus musculus OX=10090 GN=Tnrc18 PE=1 SV=2	26147	controllerType=0 controllerNumber=1 scan=19784	87.6934
10906:2	36	Y.TAPPYGQPQPGFGY.S			740.345	2	1479.68	1479.69	0	-5.4	201	Non	314.69	141.52	141.52	8.94	4	>tr|F6Z1R4|F6Z1R4_MOUSE Clathrin heavy chain 1 (Fragment) OS=Mus musculus OX=10090 GN=Cltc PE=1 SV=1	12273	controllerType=0 controllerNumber=1 scan=20294	89.431
09911:2	36	G.YTAPPYGQPQPGFG.Y			740.346	2	1479.68	1479.69	0	-3.8	200	Non	312.52	186.79	186.79	7.69	4	>tr|F6Z1R4|F6Z1R4_MOUSE Clathrin heavy chain 1 (Fragment) OS=Mus musculus OX=10090 GN=Cltc PE=1 SV=1	12273	controllerType=0 controllerNumber=1 scan=18804	84.8003
03340:2	36	Y.TAPPYGQPQP.G			528.257	2	1055.51	1055.52	0	-8.2	201	Non	273.51	22.19	22.19	3.22	4	>tr|F6Z1R4|F6Z1R4_MOUSE Clathrin heavy chain 1 (Fragment) OS=Mus musculus OX=10090 GN=Cltc PE=1 SV=1	12273	controllerType=0 controllerNumber=1 scan=9266	57.1481
12105:2	36	L.TAGPSVAVPPQAPFG.Y			698.363	2	1395.72	1395.73	0	-5.9	183	Non	166.71	4.88	4.88	2.26	4	>tr|F6Z1R4|F6Z1R4_MOUSE Clathrin heavy chain 1 (Fragment) OS=Mus musculus OX=10090 GN=Cltc PE=1 SV=1	12273	controllerType=0 controllerNumber=1 scan=22440	98.1873
12228:2	39	R.SVTRPAFLYNPLN.K			746.397	2	1491.79	1491.8	0	-6	20	CRagged	287.69	83.72	83.72	7.11	3	>tr|F6XV67|F6XV67_MOUSE RIKEN cDNA 2410004B18 gene (Fragment) OS=Mus musculus OX=10090 GN=2410004B18Rik PE=1 SV=1	17887	controllerType=0 controllerNumber=1 scan=22665	99.1361
09648:2	39	R.SVTRPAFLY.N			527.287	2	1053.57	1053.57	0	-6	20	CRagged	326.71	105.27	105.27	6.3	3	>tr|F6XV67|F6XV67_MOUSE RIKEN cDNA 2410004B18 gene (Fragment) OS=Mus musculus OX=10090 GN=2410004B18Rik PE=1 SV=1	17887	controllerType=0 controllerNumber=1 scan=18396	83.5343
09753:2	39	R.SVTRPAFLYNP.L			632.835	2	1264.66	1264.67	0	-4.7	20	CRagged	253.64	76.26	76.26	5.94	3	>tr|F6XV67|F6XV67_MOUSE RIKEN cDNA 2410004B18 gene (Fragment) OS=Mus musculus OX=10090 GN=2410004B18Rik PE=1 SV=1	17887	controllerType=0 controllerNumber=1 scan=18560	84.0456
07112:2	114	N.SYYINGKTGL.E			558.287	2	1115.57	1115.57	0	-6	1180	Non	434.41	181.27	181.27	8.09	4	>tr|F6WJB7|F6WJB7_MOUSE Ubiquitin carboxyl-terminal hydrolase 34 (Fragment) OS=Mus musculus OX=10090 GN=Usp34 PE=1 SV=1	35901	controllerType=0 controllerNumber=1 scan=14104	68.5341
06559:2	114	S.YYINGKTGL.E			514.773	2	1028.54	1028.54	0	-2.9	1181	Non	291.97	29.95	29.95	3.12	4	>tr|F6WJB7|F6WJB7_MOUSE Ubiquitin carboxyl-terminal hydrolase 34 (Fragment) OS=Mus musculus OX=10090 GN=Usp34 PE=1 SV=1	35901	controllerType=0 controllerNumber=1 scan=13350	66.5829
12070:2	114	M.LMEFAGGPPGMPPF.A			724.347	2	1447.69	1447.67	0	8.9	2667	Non	131.01	23.74	23.74	1.56	4	>tr|F6WJB7|F6WJB7_MOUSE Ubiquitin carboxyl-terminal hydrolase 34 (Fragment) OS=Mus musculus OX=10090 GN=Usp34 PE=1 SV=1	35901	controllerType=0 controllerNumber=1 scan=22374	97.8875
05592:2	130	T.SVVTARPFGTSS.R			604.814	2	1208.62	1208.63	0	-5.8	783	Non	350.94	139.62	139.62	8.55	1	>tr|F6VG99|F6VG99_MOUSE LIM domain only 7 (Fragment) OS=Mus musculus OX=10090 GN=Lmo7 PE=1 SV=1	15085	controllerType=0 controllerNumber=1 scan=12139	63.8687
05034:2	463	S.IYNRINNDL.L			567.796	2	1134.58	1134.59	0	-5.5	634	Non	253.88	62.28	62.28	1.74	1	>tr|F6V3Y9|F6V3Y9_MOUSE Autophagy-related protein 2 homolog A (Fragment) OS=Mus musculus OX=10090 GN=Atg2a PE=1 SV=1	36276	controllerType=0 controllerNumber=1 scan=11413	62.1951
09744:2	432	D.RYLPGETFV.L			541.284	2	1081.56	1081.57	0	-5.5	140	Non	268.03	57.1	57.1	2.37	1	>tr|F6UK33|F6UK33_MOUSE Polycomb protein SCMH1 (Fragment) OS=Mus musculus OX=10090 GN=Scmh1 PE=1 SV=1	9149	controllerType=0 controllerNumber=1 scan=18546	84.0024
10859:2	374	K.SEQRPSSLPVGPVL.A			733.399	2	1465.79	1465.8	0	-6.4	215	CRagged	165.71	80.73	80.73	3.2	1	>tr|F6UHR6|F6UHR6_MOUSE Oxysterol-binding protein OS=Mus musculus OX=10090 GN=Osbpl9 PE=1 SV=2	20764	controllerType=0 controllerNumber=1 scan=20211	89.1275
09709:2	326	G.SYGKLFESV.E			515.264	2	1029.52	1029.53	0	-4.4	430	Non	270.35	70.7	70.7	4.18	1	>tr|F6TZU3|F6TZU3_MOUSE Gigaxonin (Fragment) OS=Mus musculus OX=10090 GN=Gan PE=1 SV=1	19969	controllerType=0 controllerNumber=1 scan=18494	83.8501
08348:2	393	M.FYGDVQTHI.R			540.257	2	1079.51	1079.52	0	-7.6	16	Non	315.95	42.69	42.69	2.79	1	>tr|F6S251|F6S251_MOUSE Myotubularin-related protein 5 (Fragment) OS=Mus musculus OX=10090 GN=Sbf1 PE=1 SV=1	22713	controllerType=0 controllerNumber=1 scan=15718	72.2797
08569:2	311	H.TSAPEEFHTSVLQ.A			723.344	2	1445.68	1445.69	0	-7.4	56	Non	302.8	65.71	65.71	4.35	1	>tr|F6S1C4|F6S1C4_MOUSE Liprin-beta-1 (Fragment) OS=Mus musculus OX=10090 GN=Ppfibp1 PE=1 SV=1	9114	controllerType=0 controllerNumber=1 scan=16008	72.9643
06561:2	279	D.KYKDIYTEL.S			586.811	2	1172.61	1172.62	0	-5.1	925	Non	332.44	94.55	94.55	4.88	1	>tr|F6RND9|F6RND9_MOUSE Myosin phosphatase Rho-interacting protein (Fragment) OS=Mus musculus OX=10090 GN=Mprip PE=1 SV=1	31465	controllerType=0 controllerNumber=1 scan=13353	66.5913
10968:2	487	H.TNVNDGTEFGGSIY.Q			737.325	2	1473.64	1473.65	0	-4.3	182	Non	210.43	108.91	108.91	1.44	1	>tr|F2Z471|F2Z471_MOUSE Voltage-dependent anion-selective channel protein 1 OS=Mus musculus OX=10090 GN=Vdac1 PE=1 SV=1	18447	controllerType=0 controllerNumber=1 scan=20405	89.8505
09423:2	366	S.KYFGGVTAL.S			478.264	2	955.521	955.525	0	-4	230	Non	333.42	79.78	79.78	3.26	1	>tr|F2Z3X1|F2Z3X1_MOUSE Beta-1,4-galactosyltransferase 4 OS=Mus musculus OX=10090 GN=B4galt4 PE=1 SV=1	12411	controllerType=0 controllerNumber=1 scan=17976	81.9624
08672:2	496	E.IYKDSSTFL.K			537.276	2	1073.55	1073.55	0	-5.4	99	Non	306.66	31.14	31.14	1.37	1	>tr|E9QPC5|E9QPC5_MOUSE N6-adenosine-methyltransferase non-catalytic subunit OS=Mus musculus OX=10090 GN=Mettl14 PE=1 SV=2	21453	controllerType=0 controllerNumber=1 scan=16139	73.2578
11543:2	64	N.HIGGGAFGVDSPGLY.A			723.849	2	1446.69	1446.7	0	-6.8	399	Non	263.07	134.92	134.92	7.65	3	>tr|E9QP59|E9QP59_MOUSE Inner nuclear membrane protein Man1 OS=Mus musculus OX=10090 GN=Lemd3 PE=1 SV=1	29429	controllerType=0 controllerNumber=1 scan=21397	93.6625
07511:2	64	K.TNNHIGGGAFGVDSP.G			721.832	2	1442.66	1442.67	0	-5.9	396	CRagged	243.42	100.1	100.1	6.12	3	>tr|E9QP59|E9QP59_MOUSE Inner nuclear membrane protein Man1 OS=Mus musculus OX=10090 GN=Lemd3 PE=1 SV=1	29429	controllerType=0 controllerNumber=1 scan=14633	69.7905
06416:2	64	K.TNNHIGGGAFGVD.S			629.79	2	1258.57	1258.58	0	-6.5	396	CRagged	146.45	10.93	10.93	2.01	3	>tr|E9QP59|E9QP59_MOUSE Inner nuclear membrane protein Man1 OS=Mus musculus OX=10090 GN=Lemd3 PE=1 SV=1	29429	controllerType=0 controllerNumber=1 scan=13156	66.0722
12171:2	44	S.TGGTLAFVSPSLAVH.K			728.889	2	1456.77	1456.78	0	-5.7	587	Non	335.86	153.02	153.02	9.23	2	>tr|E9QMN5|E9QMN5_MOUSE Transcriptional repressor p66 alpha OS=Mus musculus OX=10090 GN=Gatad2a PE=1 SV=1	12010	controllerType=0 controllerNumber=1 scan=22565	98.7525
02752:2	44	P.SM[+15.995]QIQGQRIIQ.Q		M[+16]	659.347	2	1317.69	1317.69	0	-5.2	274	Non	233.49	89.59	89.59	6.43	2	>tr|E9QMN5|E9QMN5_MOUSE Transcriptional repressor p66 alpha OS=Mus musculus OX=10090 GN=Gatad2a PE=1 SV=1	12010	controllerType=0 controllerNumber=1 scan=8515	55.3457
09247:2	451	V.AFLEQKATAL.L			546.305	2	1091.6	1091.61	0	-6.1	262	Non	283.1	5.49	5.49	1.88	2	>tr|E9QM55|E9QM55_MOUSE F-box only protein 34 OS=Mus musculus OX=10090 GN=Fbxo34 PE=4 SV=1	13423	controllerType=0 controllerNumber=1 scan=16929	75.2441
11027:2	271	Q.SYLNSVQQL.V			526.271	2	1051.53	1051.54	0	-6.7	173	Non	335.42	50.66	50.66	4.97	1	>tr|E9QL43|E9QL43_MOUSE Nucleoporin-like protein 2 OS=Mus musculus OX=10090 GN=Nupl2 PE=1 SV=1	11478	controllerType=0 controllerNumber=1 scan=20507	90.2097
06352:2	390	Y.SYKQVGVSL.N			490.772	2	980.536	980.541	0	-5.5	841	Non	330.24	56.86	56.86	2.82	1	>tr|E9QKQ5|E9QKQ5_MOUSE Phosphatidate phosphatase LPIN1 OS=Mus musculus OX=10090 GN=Lpin1 PE=1 SV=2	5757	controllerType=0 controllerNumber=1 scan=13074	65.8976
09669:2	100	S.TSSSEIPLPESLH.T			698.848	2	1396.69	1396.7	0	-4.3	990	Non	264.65	93.52	93.52	7.17	4	>tr|E9QK89|E9QK89_MOUSE Mediator of DNA damage checkpoint protein 1 OS=Mus musculus OX=10090 GN=Mdc1 PE=1 SV=1	18967	controllerType=0 controllerNumber=1 scan=18429	83.6377
09807:2	100	F.SSVPEASTQSLLT.S			660.335	2	1319.66	1319.67	0	-4.9	963	Non	174.97	38.79	38.79	3.52	4	>tr|E9QK89|E9QK89_MOUSE Mediator of DNA damage checkpoint protein 1 OS=Mus musculus OX=10090 GN=Mdc1 PE=1 SV=1	18967	controllerType=0 controllerNumber=1 scan=18639	84.2741
06960:2	100	T.SQSQKQSTPQPLF.S			738.373	2	1475.74	1475.75	0	-7.2	976	Non	206.15	2.36	2.36	3.01	4	>tr|E9QK89|E9QK89_MOUSE Mediator of DNA damage checkpoint protein 1 OS=Mus musculus OX=10090 GN=Mdc1 PE=1 SV=1	18967	controllerType=0 controllerNumber=1 scan=13912	68.0961
09678:2	100	T.SSSEIPLPESLH.T			648.324	2	1295.64	1295.65	0	-6	991	Non	183.43	23.19	23.19	2.17	4	>tr|E9QK89|E9QK89_MOUSE Mediator of DNA damage checkpoint protein 1 OS=Mus musculus OX=10090 GN=Mdc1 PE=1 SV=1	18967	controllerType=0 controllerNumber=1 scan=18443	83.6788
03814:2	129	A.SVAPPSATPNRLT.S			655.853	2	1310.7	1310.71	0	-5.4	493	Non	304.72	110.89	110.89	8.55	1	>tr|E9QAN9|E9QAN9_MOUSE Interferon-activable protein 203 OS=Mus musculus OX=10090 GN=Ifi203 PE=1 SV=1	20387	controllerType=0 controllerNumber=1 scan=9865	58.5987
13055:2	337	K.TQVLSPDSLFT.A			604.309	2	1207.61	1207.62	0	-7.4	1722	CRagged	301.33	57.08	57.08	3.73	5	>tr|E9Q9C3|E9Q9C3_MOUSE Afadin OS=Mus musculus OX=10090 GN=Afdn PE=1 SV=1	6770	controllerType=0 controllerNumber=1 scan=24154	105.214
07551:2	78	H.SPTPVAPHPVTVPT.Y			700.379	2	1399.75	1399.76	0	-5.7	172	Non	459.24	280.38	280.38	9.86	2	>tr|E9Q917|E9Q917_MOUSE Myelin-associated neurite-outgrowth inhibitor OS=Mus musculus OX=10090 GN=Fam168b PE=1 SV=1	6924	controllerType=0 controllerNumber=1 scan=14688	69.9291
03344:2	78	A.HSPTPVAPHPVTV.P			669.859	2	1338.71	1338.72	0	-5	171	Non	157.86	65.49	65.49	2.94	2	>tr|E9Q917|E9Q917_MOUSE Myelin-associated neurite-outgrowth inhibitor OS=Mus musculus OX=10090 GN=Fam168b PE=1 SV=1	6924	controllerType=0 controllerNumber=1 scan=9271	57.1631
09416:2	115	T.TTALSTVSSGAQRVL.V			745.909	2	1490.81	1490.82	0	-4.4	476	Non	319.36	156.41	156.41	8.97	2	>tr|E9Q8N5|E9Q8N5_MOUSE CLIP-associating protein 2 OS=Mus musculus OX=10090 GN=Clasp2 PE=1 SV=1	9488	controllerType=0 controllerNumber=1 scan=17953	81.8394
07866:2	242	G.TYTNTLERL.V			555.79	2	1110.57	1110.58	0	-4.8	654	Non	370.24	64.97	64.97	5.38	1	>tr|E9Q839|E9Q839_MOUSE SMC5-SMC6 complex localization factor protein 2 OS=Mus musculus OX=10090 GN=Slf2 PE=1 SV=1	11649	controllerType=0 controllerNumber=1 scan=15095	70.8482
08324:2	285	Q.TTSPKVIQPLVQ.Q			655.883	2	1310.76	1310.77	0	-6.5	619	Non	205.41	89.19	89.19	4.51	2	>tr|E9Q640|E9Q640_MOUSE RNA-binding protein 26 OS=Mus musculus OX=10090 GN=Rbm26 PE=1 SV=1	15978	controllerType=0 controllerNumber=1 scan=15688	72.2126
10486:2	284	T.AYLEDRPLSM[+15.995]L.Y		M[+16]	662.331	2	1323.65	1323.66	0	-5.2	548	Non	278.68	46.35	46.35	4.23	1	>tr|E9Q600|E9Q600_MOUSE Lysyl oxidase homolog 4 OS=Mus musculus OX=10090 GN=Loxl4 PE=1 SV=1	14401	controllerType=0 controllerNumber=1 scan=19642	87.2855
09740:2	385	G.IIEPSLRQLAQ.K			634.369	2	1267.73	1267.74	0	-5.3	181	Non	222.91	40.61	40.61	2.15	2	>tr|E9Q4P0|E9Q4P0_MOUSE KxDL motif-containing protein 1 (Fragment) OS=Mus musculus OX=10090 GN=Kxd1 PE=1 SV=1	16900	controllerType=0 controllerNumber=1 scan=18540	83.9835
09345:2	230	A.SYNLTVREL.K			547.793	2	1094.58	1094.58	0	-3.9	161	Non	450.03	177.41	177.41	5.62	2	>tr|E9Q3Y4|E9Q3Y4_MOUSE Lipopolysaccharide-responsive and beige-like anchor protein OS=Mus musculus OX=10090 GN=Lrba PE=1 SV=1	15510	controllerType=0 controllerNumber=1 scan=17565	79.4105
02719:2	138	V.VGPELHEKL.L			511.285	2	1021.56	1021.57	0	-4.6	3257	Non	368.91	149.32	149.32	7.53	5	>tr|E9Q3W4|E9Q3W4_MOUSE Plectin OS=Mus musculus OX=10090 GN=Plec PE=1 SV=1	2653	controllerType=0 controllerNumber=1 scan=8469	55.226
04398:2	138	I.VGPEFKDKL.L			516.787	2	1032.57	1032.57	0	-5.8	3835	Non	281.32	45.35	45.35	2.86	5	>tr|E9Q3W4|E9Q3W4_MOUSE Plectin OS=Mus musculus OX=10090 GN=Plec PE=1 SV=1	2653	controllerType=0 controllerNumber=1 scan=10605	60.354
03805:3	138	V.VGPELHHKLL.S			381.558	3	1142.66	1142.67	0	-6.4	2598	Non	55.92	11.88	11.88	1.87	5	>tr|E9Q3W4|E9Q3W4_MOUSE Plectin OS=Mus musculus OX=10090 GN=Plec PE=1 SV=1	2653	controllerType=0 controllerNumber=1 scan=9854	58.5771
10539:2	138	R.HYQQLLQSL.E			565.298	2	1129.59	1129.6	0	-9.8	804	CRagged	230.49	0.85	0.85	1.53	5	>tr|E9Q3W4|E9Q3W4_MOUSE Plectin OS=Mus musculus OX=10090 GN=Plec PE=1 SV=1	2653	controllerType=0 controllerNumber=1 scan=19716	87.4964
09389:2	488	A.KYAVAIGSL.C			461.272	2	921.536	921.54	0	-4.4	329	Non	267.68	34.23	34.23	1.44	2	>tr|E9Q3N1|E9Q3N1_MOUSE High affinity cationic amino acid transporter 1 (Fragment) OS=Mus musculus OX=10090 GN=Slc7a1 PE=1 SV=8	19001	controllerType=0 controllerNumber=1 scan=17826	81.0733
10393:2	85	L.VYSQIPAAVKL.T			594.849	2	1188.69	1188.7	0	-6.2	1803	Non	339.9	116.62	116.62	8.23	2	>tr|E9Q2H1|E9Q2H1_MOUSE E3 ubiquitin-protein ligase UBR5 OS=Mus musculus OX=10090 GN=Ubr5 PE=1 SV=2	7232	controllerType=0 controllerNumber=1 scan=19508	86.8871
10849:2	85	A.SNASSYLTSASSL.A			644.304	2	1287.6	1287.61	0	-4.7	1766	Non	226.92	73.91	73.91	4.18	2	>tr|E9Q2H1|E9Q2H1_MOUSE E3 ubiquitin-protein ligase UBR5 OS=Mus musculus OX=10090 GN=Ubr5 PE=1 SV=2	7232	controllerType=0 controllerNumber=1 scan=20195	89.0714
05661:2	386	T.TQVIEPHDI.S			526.273	2	1051.54	1051.54	0	-3.6	1178	Non	307.78	51.35	51.35	2.85	1	>tr|E9PZY8|E9PZY8_MOUSE Protein virilizer homolog OS=Mus musculus OX=10090 GN=Virma PE=1 SV=1	13732	controllerType=0 controllerNumber=1 scan=12224	64.0528
05397:2	375	G.AYLPQYTHM[+15.995].Q		M[+16]	570.26	2	1139.51	1139.52	0	-6.5	376	Non	274.77	64.73	64.73	2.54	1	>tr|E9PZ21|E9PZ21_MOUSE RNA-binding motif, single-stranded-interacting protein 1 OS=Mus musculus OX=10090 GN=Rbms1 PE=1 SV=1	16333	controllerType=0 controllerNumber=1 scan=11878	63.2349
07168:2	483	G.YAIKGGGSAPK.A			524.79	2	1048.57	1048.58	0	-5.2	6	NRagged	298.61	29.26	29.26	1.46	1	>tr|E9PYD7|E9PYD7_MOUSE Kelch repeat and BTB (POZ) domain-containing 6 OS=Mus musculus OX=10090 GN=Kbtbd6 PE=4 SV=3	22015	controllerType=0 controllerNumber=1 scan=14176	68.6991
01776:2	281	Q.TYAAPSM[+15.995]AQP.-		M[+16]	526.737	2	1052.47	1052.47	0	-5	567	Non	299.72	128.43	128.43	4.29	1	>tr|E9PY48|E9PY48_MOUSE Condensin-2 complex subunit H2 OS=Mus musculus OX=10090 GN=Ncaph2 PE=1 SV=1	29698	controllerType=0 controllerNumber=1 scan=7180	51.7651
09314:2	152	H.NYVPGKFTV.S			512.774	2	1024.54	1024.55	0	-5	394	Non	396.55	151.58	151.58	7.99	2	>tr|E9PXX8|E9PXX8_MOUSE Metastasis-associated in colon cancer 1 OS=Mus musculus OX=10090 GN=Macc1 PE=1 SV=1	26918	controllerType=0 controllerNumber=1 scan=17087	75.9811
07815:2	361	S.KYSTTSTFL.V			524.269	2	1047.53	1047.54	0	-5.1	50	Non	276.47	58.7	58.7	3.3	1	>tr|E9PXA4|E9PXA4_MOUSE N-alpha-acetyltransferase 20 (Fragment) OS=Mus musculus OX=10090 GN=Naa20 PE=1 SV=8	7131	controllerType=0 controllerNumber=1 scan=15029	70.7022
08049:2	424	A.HENQPLLLTSG.C			604.814	2	1208.62	1208.63	0	-4.9	81	Non	236.41	38.75	38.75	2.49	1	>tr|E9PWW2|E9PWW2_MOUSE Torsin-1A-interacting protein 1 OS=Mus musculus OX=10090 GN=Tor1aip1 PE=1 SV=1	10804	controllerType=0 controllerNumber=1 scan=15317	71.3203
05689:2	282	Y.RYLPPATQV.V			522.792	2	1044.58	1044.58	0	-6.2	206	Non	301	88.97	88.97	5.68	1	>tr|E9PV04|E9PV04_MOUSE Uncharacterized protein OS=Mus musculus OX=10090 GN=Gm8994 PE=3 SV=2	3743	controllerType=0 controllerNumber=1 scan=12257	64.1175
04768:2	442	D.KYLQEM[+15.995]EDL.R		M[+16]	592.775	2	1184.54	1184.55	0	-5.6	398	Non	232.95	69.66	69.66	1.52	1	>tr|E9PUV9|E9PUV9_MOUSE Caspase recruitment domain-containing protein 10 OS=Mus musculus OX=10090 GN=Card10 PE=1 SV=1	12782	controllerType=0 controllerNumber=1 scan=11064	61.3762
07224:2	392	L.GGPAIVHGL.N			410.735	2	820.463	820.467	0	-4.9	42	Non	246.48	44.72	44.72	2.61	3	>tr|E9PUC2|E9PUC2_MOUSE Long-chain-fatty-acid--CoA ligase 3 OS=Mus musculus OX=10090 GN=Acsl3 PE=1 SV=1	26368	controllerType=0 controllerNumber=1 scan=14255	68.9032
09394:2	267	K.KYLGQLTSI.P			511.795	2	1022.58	1022.59	0	-5.1	10	CRagged	364.4	95.74	95.74	5.03	1	>tr|E0CZ84|E0CZ84_MOUSE Cerebral cavernous malformations protein 2 homolog (Fragment) OS=Mus musculus OX=10090 GN=Ccm2 PE=1 SV=1	35283	controllerType=0 controllerNumber=1 scan=17850	81.2186
10199:2	491	Y.TQPVPVPNANAIA.V			646.35	2	1291.69	1291.7	0	-6.6	63	Non	192.9	36.15	36.15	1.42	1	>tr|E0CYR5|E0CYR5_MOUSE Lipopolysaccharide-induced tumor necrosis factor-alpha factor homolog (Fragment) OS=Mus musculus OX=10090 GN=Litaf PE=4 SV=1	30605	controllerType=0 controllerNumber=1 scan=19213	85.96
08035:2	193	G.SYVSIHSSGF.R			542.256	2	1083.5	1083.51	0	-6	37	Non	374.56	87.56	87.56	7.45	1	>tr|D6RHT5|D6RHT5_MOUSE DEAD (Asp-Glu-Ala-Asp) box polypeptide 39 OS=Mus musculus OX=10090 GN=Ddx39 PE=1 SV=1	13207	controllerType=0 controllerNumber=1 scan=15300	71.282
10140:2	410	Y.TQGANQSGQVFGLG.R			682.33	2	1363.65	1363.66	0	-6	213	Non	187.67	68.96	68.96	2.59	1	>tr|D3Z7R6|D3Z7R6_MOUSE Calponin OS=Mus musculus OX=10090 GN=Cnn2 PE=1 SV=1	14218	controllerType=0 controllerNumber=1 scan=19129	85.7247
10242:2	126	Q.SYLENPTSYHL.Q			662.31	2	1323.61	1323.62	0	-6.6	73	Non	427.95	207.82	207.82	8.61	1	>tr|D3Z6Q7|D3Z6Q7_MOUSE Transcription factor EB OS=Mus musculus OX=10090 GN=Tfeb PE=1 SV=1	14019	controllerType=0 controllerNumber=1 scan=19276	86.1584
06165:2	144	Q.SYKAGIYSV.E			494.259	2	987.51	987.515	0	-4.8	189	Non	385.36	132.11	132.11	8.12	1	>tr|D3Z647|D3Z647_MOUSE Ubiquitin-conjugating enzyme E2 Q2 OS=Mus musculus OX=10090 GN=Ube2q2 PE=1 SV=1	31828	controllerType=0 controllerNumber=1 scan=12847	65.414
07121:2	365	K.SSLLPVMVWIHG.G			669.868	2	1338.73	1338.72	0	3.9	130	CRagged	282.13	120.22	120.22	3.27	1	>tr|D3Z5G7|D3Z5G7_MOUSE Carboxylic ester hydrolase OS=Mus musculus OX=10090 GN=Ces1b PE=1 SV=1	34064	controllerType=0 controllerNumber=1 scan=14115	68.5591
05175:2	208	F.TYVPSRLGEDA.K			604.298	2	1207.59	1207.6	0	-5.1	11	Non	262.94	72.75	72.75	6.91	3	>tr|D3Z5G4|D3Z5G4_MOUSE Zinc finger RNA-binding protein OS=Mus musculus OX=10090 GN=Zfr PE=1 SV=2	21678	controllerType=0 controllerNumber=1 scan=11590	62.5659
00865:2	208	T.HSGAAAAAAAAQYS.Q			623.789	2	1246.57	1246.58	0	-7.7	33	Non	70.99	13.14	13.14	2.13	3	>tr|D3Z5G4|D3Z5G4_MOUSE Zinc finger RNA-binding protein OS=Mus musculus OX=10090 GN=Zfr PE=1 SV=2	21678	controllerType=0 controllerNumber=1 scan=5816	47.2846
03521:2	208	R.STAPAVAYDSKQY.Y			700.835	2	1400.66	1400.67	0	-4.1	148	CRagged	178.41	24.98	24.98	1.93	3	>tr|D3Z5G4|D3Z5G4_MOUSE Zinc finger RNA-binding protein OS=Mus musculus OX=10090 GN=Zfr PE=1 SV=2	21678	controllerType=0 controllerNumber=1 scan=9492	57.7011
10349:2	356	F.TYAPVKSFL.R			513.285	2	1025.56	1025.57	0	-4.4	239	Non	257.09	68.48	68.48	3.37	1	>tr|D3Z3V2|D3Z3V2_MOUSE CMP-N-acetylneuraminate-beta-galactosamide-alpha-2,3-sialyltransferase 2 OS=Mus musculus OX=10090 GN=St3gal2 PE=1 SV=1	35791	controllerType=0 controllerNumber=1 scan=19439	86.6632
10789:2	261	R.KYGVVLDEI.K			518.286	2	1035.57	1035.57	0	-6.8	65	CRagged	378.12	142.93	142.93	5.16	1	>tr|D3Z315|D3Z315_MOUSE Coatomer subunit epsilon (Fragment) OS=Mus musculus OX=10090 GN=Cope PE=1 SV=1	30622	controllerType=0 controllerNumber=1 scan=20099	88.7564
09401:2	71	G.TYSIM[+15.995]IQKI.L		M[+16]	556.802	2	1112.6	1112.6	0	-4.3	494	Non	439.71	52.88	52.88	6.91	2	>tr|D3Z1H6|D3Z1H6_MOUSE Transient receptor potential cation channel subfamily V member 4 OS=Mus musculus OX=10090 GN=Trpv4 PE=1 SV=1	9296	controllerType=0 controllerNumber=1 scan=17872	81.3332
10796:2	71	G.TYSIMIQKI.L			548.804	2	1096.6	1096.61	0	-5.5	494	Non	298.56	59.78	59.78	5.16	2	>tr|D3Z1H6|D3Z1H6_MOUSE Transient receptor potential cation channel subfamily V member 4 OS=Mus musculus OX=10090 GN=Trpv4 PE=1 SV=1	9296	controllerType=0 controllerNumber=1 scan=20111	88.8009
08151:2	26	Q.SPNSYFM[+15.995]DVKCPG.C		M[+16]	730.809	2	1460.61	1460.62	0	-5.6	27	Non	255.58	98.84	98.84	7.36	4	>tr|D3YYB0|D3YYB0_MOUSE 40S ribosomal protein S27 OS=Mus musculus OX=10090 GN=Rps27l PE=1 SV=1	2668	controllerType=0 controllerNumber=1 scan=15456	71.6576
05508:2	26	Q.SPNSYFM[+15.995]DVK.C		M[+16]	602.268	2	1203.53	1203.54	0	-5.7	27	NRagged	326.88	128.94	128.94	6.27	4	>tr|D3YYB0|D3YYB0_MOUSE 40S ribosomal protein S27 OS=Mus musculus OX=10090 GN=Rps27l PE=1 SV=1	2668	controllerType=0 controllerNumber=1 scan=12029	63.6093
09461:2	26	Q.SPNSYFMDVKCPG.C			722.813	2	1444.62	1444.62	0	-3.1	27	Non	227.2	115.93	115.93	4.79	4	>tr|D3YYB0|D3YYB0_MOUSE 40S ribosomal protein S27 OS=Mus musculus OX=10090 GN=Rps27l PE=1 SV=1	2668	controllerType=0 controllerNumber=1 scan=18076	82.4461
10442:2	26	I.TTVFSHAQTVVL.C			651.853	2	1302.7	1302.71	0	-5.4	44	Non	236.66	42.93	42.93	4.59	4	>tr|D3YYB0|D3YYB0_MOUSE 40S ribosomal protein S27 OS=Mus musculus OX=10090 GN=Rps27l PE=1 SV=1	2668	controllerType=0 controllerNumber=1 scan=19578	87.0889
05801:2	494	Y.TAIEAPKGEFG.V			560.288	2	1119.57	1119.57	0	0.3	372	Non	269.03	59.63	59.63	1.4	1	>tr|D3YXT0|D3YXT0_MOUSE NADH dehydrogenase [ubiquinone] iron-sulfur protein 2, mitochondrial OS=Mus musculus OX=10090 GN=Ndufs2 PE=1 SV=1	10384	controllerType=0 controllerNumber=1 scan=12386	64.3826
06806:2	371	K.TVPGAHPVPVYA.F			604.325	2	1207.64	1207.65	0	-4.2	455	CRagged	244.55	87.84	87.84	3.05	2	>tr|D3YXR5|D3YXR5_MOUSE Protein PML OS=Mus musculus OX=10090 GN=Pml PE=1 SV=1	15179	controllerType=0 controllerNumber=1 scan=13722	67.6821
11103:2	225	K.AYKAVLNYL.K			527.797	2	1054.59	1054.59	0	-6.1	77	CRagged	340.6	154.44	154.44	5.69	1	>tr|D3YXN3|D3YXN3_MOUSE Testis-expressed protein 30 (Fragment) OS=Mus musculus OX=10090 GN=Tex30 PE=1 SV=8	7518	controllerType=0 controllerNumber=1 scan=20628	90.6361
08204:2	360	G.AFQKTLSDL.Q			511.777	2	1022.55	1022.55	0	-5.3	115	Non	355.39	40.31	40.31	3.31	1	>tr|D3YVJ7|D3YVJ7_MOUSE Aldo-keto reductase family 1, member B3 (aldose reductase) (Fragment) OS=Mus musculus OX=10090 GN=Akr1b3 PE=1 SV=1	12395	controllerType=0 controllerNumber=1 scan=15535	71.875
09317:2	66	C.HIFASFNDT.F			526.244	2	1051.48	1051.48	0	-3.9	32	Non	379.01	168.79	168.79	6.21	3	>tr|D3YVF4|D3YVF4_MOUSE 40S ribosomal protein S14 (Fragment) OS=Mus musculus OX=10090 GN=Rps14 PE=1 SV=1	11719	controllerType=0 controllerNumber=1 scan=17147	76.4227
12384:2	66	C.HIFASFNDTF.V			599.776	2	1198.54	1198.55	0	-7.4	32	Non	262.25	77.5	77.5	4.18	3	>tr|D3YVF4|D3YVF4_MOUSE 40S ribosomal protein S14 (Fragment) OS=Mus musculus OX=10090 GN=Rps14 PE=1 SV=1	11719	controllerType=0 controllerNumber=1 scan=22990	100.747
10981:2	66	C.HIFASFNDTFVH.V			717.84	2	1434.67	1434.68	0	-5.7	32	Non	209.04	80.58	80.58	3.57	3	>tr|D3YVF4|D3YVF4_MOUSE 40S ribosomal protein S14 (Fragment) OS=Mus musculus OX=10090 GN=Rps14 PE=1 SV=1	11719	controllerType=0 controllerNumber=1 scan=20427	89.9207
11395:2	127	P.TQFINPETPGYVG.F			711.844	2	1422.68	1422.69	0	-6.4	7	Non	311.62	154.23	154.23	8.55	1	>tr|D3YV76|D3YV76_MOUSE Septin-2 (Fragment) OS=Mus musculus OX=10090 GN=Sept2 PE=1 SV=1	9595	controllerType=0 controllerNumber=1 scan=21154	92.7828
12316:2	247	K.DYQRLLQTI.A			575.312	2	1149.62	1149.63	0	-8.4	509	CRagged	406.3	109.07	109.07	5.34	1	>tr|D3YTT9|D3YTT9_MOUSE ZZ-type zinc finger-containing protein 3 OS=Mus musculus OX=10090 GN=Zzz3 PE=1 SV=1	31248	controllerType=0 controllerNumber=1 scan=22855	100.079
07925:2	266	G.HQEYSSSPLFQ.V			661.8	2	1322.59	1322.6	0	-5.8	1721	Non	244.48	115.04	115.04	5.08	1	>tr|D3YTS3|D3YTS3_MOUSE RIKEN cDNA D630045J12 gene OS=Mus musculus OX=10090 GN=D630045J12Rik PE=1 SV=2	32570	controllerType=0 controllerNumber=1 scan=15168	71.0051
09592:2	339	Y.GFLKSISNV.S			482.774	2	964.54	964.546	0	-6.1	502	Non	277.51	54.2	54.2	3.79	2	>tr|B9EJX5|B9EJX5_MOUSE TAF2 RNA polymerase II, TATA box binding protein (TBP)-associated factor OS=Mus musculus OX=10090 GN=Taf2 PE=1 SV=1	4907	controllerType=0 controllerNumber=1 scan=18312	83.2914
07353:2	343	S.NYIDSIHHL.L			556.276	2	1111.54	1111.55	0	-8.3	140	Non	327.2	109.95	109.95	3.83	1	>tr|B9EI20|B9EI20_MOUSE Leucine rich repeat and coiled-coil domain containing 1 OS=Mus musculus OX=10090 GN=Lrrcc1 PE=1 SV=1	4005	controllerType=0 controllerNumber=1 scan=14421	69.273
06584:2	312	S.TKWGETTFM[+15.995].A		M[+16]	558.752	2	1116.5	1116.5	0	-6.3	33	Non	284.1	55.36	55.36	3.79	1	>tr|B7ZP47|B7ZP47_MOUSE Wapal protein OS=Mus musculus OX=10090 GN=Wapl PE=1 SV=1	27653	controllerType=0 controllerNumber=1 scan=13403	66.7995
12916:2	23	V.TYTPM[+15.995]APGSYLI.S		M[+16]	665.319	2	1329.63	1329.64	0	-5.9	2478	Non	416.62	191.35	191.35	8.89	5	>tr|B7FAU9|B7FAU9_MOUSE Filamin, alpha OS=Mus musculus OX=10090 GN=Flna PE=1 SV=1	4856	controllerType=0 controllerNumber=1 scan=23996	104.948
10100:2	23	S.VFVDSLTKV.A			504.289	2	1007.57	1007.58	0	-6.3	2525	Non	306.03	86.48	86.48	7.05	5	>tr|B7FAU9|B7FAU9_MOUSE Filamin, alpha OS=Mus musculus OX=10090 GN=Flna PE=1 SV=1	4856	controllerType=0 controllerNumber=1 scan=19071	85.5528
03354:2	23	V.KYIPVQQGP.V			515.286	2	1029.57	1029.57	0	-6.9	936	Non	329.05	91.98	91.98	6.86	5	>tr|B7FAU9|B7FAU9_MOUSE Filamin, alpha OS=Mus musculus OX=10090 GN=Flna PE=1 SV=1	4856	controllerType=0 controllerNumber=1 scan=9284	57.1947
12586:1	23	R.LYSV.S			481.26	1	481.26	481.266	0	-11.2	2605	CRagged	118.19	118.19	118.19	1.4	5	>tr|B7FAU9|B7FAU9_MOUSE Filamin, alpha OS=Mus musculus OX=10090 GN=Flna PE=1 SV=1	4856	controllerType=0 controllerNumber=1 scan=23364	102.337
10431:2	209	D.SYVTIQNSEL.M			577.287	2	1153.57	1153.57	0	-6.4	636	Non	322.38	119.46	119.46	7.14	2	>tr|B2RXC6|B2RXC6_MOUSE DNA-directed RNA polymerase subunit OS=Mus musculus OX=10090 GN=Polr3a PE=1 SV=1	27384	controllerType=0 controllerNumber=1 scan=19559	87.0237
08083:2	209	A.LVLMGTKAN.L			473.771	2	946.534	946.539	0	-5.5	520	Non	189.19	14.91	14.91	1.93	2	>tr|B2RXC6|B2RXC6_MOUSE DNA-directed RNA polymerase subunit OS=Mus musculus OX=10090 GN=Polr3a PE=1 SV=1	27384	controllerType=0 controllerNumber=1 scan=15358	71.4023
10836:2	434	G.KYVYVVTEL.M			557.31	2	1113.61	1113.62	0	-5.9	459	Non	299.6	40.51	40.51	2.37	1	>tr|B1AXN9|B1AXN9_MOUSE Non-specific serine/threonine protein kinase OS=Mus musculus OX=10090 GN=Rps6ka3 PE=1 SV=1	6231	controllerType=0 controllerNumber=1 scan=20175	89.01
02012:2	108	K.TAAAQVGTSVSSAAN.T			667.827	2	1334.65	1334.65	0	-5.2	612	CRagged	385.91	257.5	257.5	8.95	2	>tr|B1AUX2|B1AUX2_MOUSE Host cell factor 1 OS=Mus musculus OX=10090 GN=Hcfc1 PE=1 SV=1	29599	controllerType=0 controllerNumber=1 scan=7548	52.9268
05607:2	108	Q.TKGPLPAGTILK.L			598.369	2	1195.73	1195.74	0	-8.2	712	NRagged	221.89	38.65	38.65	2.25	2	>tr|B1AUX2|B1AUX2_MOUSE Host cell factor 1 OS=Mus musculus OX=10090 GN=Hcfc1 PE=1 SV=1	29599	controllerType=0 controllerNumber=1 scan=12157	63.9067
06815:2	364	A.KYSAQIEDL.Q			533.771	2	1066.54	1066.54	0	-5.9	661	Non	286.38	39.53	39.53	3.3	1	>tr|B1AUF1|B1AUF1_MOUSE Ski oncogene OS=Mus musculus OX=10090 GN=Ski PE=1 SV=1	5032	controllerType=0 controllerNumber=1 scan=13733	67.7027
12150:2	80	F.SYFPEITHI.V			553.776	2	1106.54	1106.55	0	-7	367	Non	305.26	83.16	83.16	6.86	2	>tr|B1ASP2|B1ASP2_MOUSE Tyrosine-protein kinase OS=Mus musculus OX=10090 GN=Jak1 PE=1 SV=1	303	controllerType=0 controllerNumber=1 scan=22525	98.5795
07594:2	80	M.DYLGSRQYV.H			550.768	2	1100.53	1100.54	0	-7.8	991	Non	311.97	67.59	67.59	5.98	2	>tr|B1ASP2|B1ASP2_MOUSE Tyrosine-protein kinase OS=Mus musculus OX=10090 GN=Jak1 PE=1 SV=1	303	controllerType=0 controllerNumber=1 scan=14737	70.0222
07153:2	53	A.SYPSASVENY.Q			558.742	2	1116.48	1116.48	0	-6	164	Non	478.46	213.46	213.46	8.24	2	>tr|B0QZP8|B0QZP8_MOUSE Synaptogyrin 2, isoform CRA_c OS=Mus musculus OX=10090 GN=Syngr2 PE=4 SV=1	3846	controllerType=0 controllerNumber=1 scan=14156	68.6542
05984:2	53	A.SYPSASVENYQ.Q			622.77	2	1244.53	1244.54	0	-7.5	164	Non	269.8	90.42	90.42	6.3	2	>tr|B0QZP8|B0QZP8_MOUSE Synaptogyrin 2, isoform CRA_c OS=Mus musculus OX=10090 GN=Syngr2 PE=4 SV=1	3846	controllerType=0 controllerNumber=1 scan=12611	64.8682
10647:2	186	N.SIQVLASKSAILE.A			679.895	2	1358.78	1358.79	0	-4.7	159	Non	264.75	82.55	82.55	7.56	1	>tr|A2AVJ7|A2AVJ7_MOUSE Ribosome-binding protein 1 OS=Mus musculus OX=10090 GN=Rrbp1 PE=1 SV=1	20011	controllerType=0 controllerNumber=1 scan=19872	87.9443
07460:2	150	S.TLQYPRPSSGTLA.S			695.867	2	1390.73	1390.73	0	-4.3	877	Non	301.09	98.14	98.14	7.95	2	>tr|A2AUX5|A2AUX5_MOUSE Disabled homolog 2-interacting protein OS=Mus musculus OX=10090 GN=Dab2ip PE=1 SV=1	26538	controllerType=0 controllerNumber=1 scan=14567	69.6365
07995:2	150	R.PTLLSLPRS.H			492.295	2	983.582	983.588	0	-6	49	CRagged	187.16	10.22	10.22	1.54	2	>tr|A2AUX5|A2AUX5_MOUSE Disabled homolog 2-interacting protein OS=Mus musculus OX=10090 GN=Dab2ip PE=1 SV=1	26538	controllerType=0 controllerNumber=1 scan=15250	71.1719
11911:2	113	K.TTIPVKLFA.R			495.302	2	989.596	989.603	0	-6.9	160	CRagged	375	64.66	64.66	6.12	3	>tr|A2AU62|A2AU62_MOUSE RNA-binding protein Raly (Fragment) OS=Mus musculus OX=10090 GN=Raly PE=1 SV=1	17932	controllerType=0 controllerNumber=1 scan=22077	96.5724
12146:2	113	K.TTIPVKLF.A			459.783	2	918.559	918.566	0	-7.7	160	CRagged	310.8	68.24	68.24	4.93	3	>tr|A2AU62|A2AU62_MOUSE RNA-binding protein Raly (Fragment) OS=Mus musculus OX=10090 GN=Raly PE=1 SV=1	17932	controllerType=0 controllerNumber=1 scan=22515	98.5212
11716:2	50	S.SSWVSADGFLR.R			612.801	2	1224.59	1224.6	0	-5.8	36	NRagged	411.56	197.79	197.79	7.9	3	>tr|A2AQW6|A2AQW6_MOUSE Pre-mRNA-processing factor 40 homolog A (Fragment) OS=Mus musculus OX=10090 GN=Prpf40a PE=1 SV=2	17038	controllerType=0 controllerNumber=1 scan=21734	95.1761
11697:2	50	C.SSSWVSADGFLR.R			656.315	2	1311.62	1311.63	0	-8	35	NRagged	284.23	104.34	104.34	6.39	3	>tr|A2AQW6|A2AQW6_MOUSE Pre-mRNA-processing factor 40 homolog A (Fragment) OS=Mus musculus OX=10090 GN=Prpf40a PE=1 SV=2	17038	controllerType=0 controllerNumber=1 scan=21695	94.9986
11795:2	50	S.SWVSADGFLR.R			569.284	2	1137.56	1137.57	0	-7.6	37	NRagged	259.22	49.24	49.24	2.3	3	>tr|A2AQW6|A2AQW6_MOUSE Pre-mRNA-processing factor 40 homolog A (Fragment) OS=Mus musculus OX=10090 GN=Prpf40a PE=1 SV=2	17038	controllerType=0 controllerNumber=1 scan=21873	95.7219
09932:2	178	F.GYFEVTHDI.T			540.75	2	1080.49	1080.5	0	-5.9	83	Non	339.38	125.17	125.17	7.59	1	>tr|A2AL20|A2AL20_MOUSE Catalase OS=Mus musculus OX=10090 GN=Cat PE=1 SV=1	2284	controllerType=0 controllerNumber=1 scan=18832	84.8712
08866:2	176	D.VGPIVQHIY.E			513.289	2	1025.57	1025.58	0	-7.2	766	Non	307.07	125.27	125.27	6.01	3	>tr|A2AKI5|A2AKI5_MOUSE Integrin alpha-V OS=Mus musculus OX=10090 GN=Itgav PE=1 SV=1	12607	controllerType=0 controllerNumber=1 scan=16410	73.9502
06684:2	176	D.VGPIVQHI.Y			431.759	2	862.51	862.514	0	-4.9	766	Non	247.77	65.89	65.89	3.97	3	>tr|A2AKI5|A2AKI5_MOUSE Integrin alpha-V OS=Mus musculus OX=10090 GN=Itgav PE=1 SV=1	12607	controllerType=0 controllerNumber=1 scan=13561	67.2938
09378:2	210	E.QYVSAFSKL.A			521.78	2	1042.55	1042.56	0	-4.1	235	Non	467.04	238.68	238.68	7.26	1	>tr|A2AG39|A2AG39_MOUSE Stomatin-like protein 2, mitochondrial (Fragment) OS=Mus musculus OX=10090 GN=Stoml2 PE=1 SV=1	6638	controllerType=0 controllerNumber=1 scan=17781	80.8107
09344:2	319	A.KYNPIGESVL.R			560.304	2	1119.6	1119.6	0	-3.7	439	Non	351.37	90.35	90.35	4.24	1	>tr|A2AE27|A2AE27_MOUSE AMP deaminase OS=Mus musculus OX=10090 GN=Ampd2 PE=1 SV=1	2557	controllerType=0 controllerNumber=1 scan=17564	79.4053
08494:2	352	S.TPAGPVNLLK.G			505.303	2	1009.6	1009.6	0	-5.7	2681	NRagged	315.67	42.31	42.31	3.43	6	>tr|A2ADB0|A2ADB0_MOUSE Msx2-interacting protein OS=Mus musculus OX=10090 GN=Spen PE=1 SV=1	9333	controllerType=0 controllerNumber=1 scan=15913	72.7525
11586:2	408	R.GFIEDVTHV.P			508.752	2	1016.5	1016.5	0	-6.9	190	CRagged	315.3	61.29	61.29	2.61	1	>tr|A2AAV6|A2AAV6_MOUSE Meteorin-like protein (Fragment) OS=Mus musculus OX=10090 GN=Metrnl PE=1 SV=1	34460	controllerType=0 controllerNumber=1 scan=21472	93.9725
10936:2	79	T.TTNQGASAAGPGFSL.K			689.83	2	1378.65	1378.66	0	-4.6	734	Non	484.44	243	243	9.65	3	>tr|A2A9P6|A2A9P6_MOUSE Cyclin-dependent kinase 11B OS=Mus musculus OX=10090 GN=Cdk11b PE=1 SV=1	12178	controllerType=0 controllerNumber=1 scan=20346	89.6176
05741:2	79	T.TNQGASAAGPGFSLK.F			703.353	2	1405.7	1405.71	0	-6.3	735	NRagged	205.77	57.44	57.44	3.09	3	>tr|A2A9P6|A2A9P6_MOUSE Cyclin-dependent kinase 11B OS=Mus musculus OX=10090 GN=Cdk11b PE=1 SV=1	12178	controllerType=0 controllerNumber=1 scan=12315	64.2314
06567:2	373	N.YYIDGKIQT.N			550.783	2	1100.56	1100.56	0	-3.7	563	Non	310.77	42.24	42.24	3.22	2	>tr|A2A7B5|A2A7B5_MOUSE PR domain-containing 2, with ZNF domain OS=Mus musculus OX=10090 GN=Prdm2 PE=1 SV=1	7758	controllerType=0 controllerNumber=1 scan=13365	66.6425
03901:2	229	H.HIPTSAPVYQ.Q			556.786	2	1112.56	1112.57	0	-7.8	129	Non	358.28	152.51	152.51	5.61	1	>tr|A2A6H0|A2A6H0_MOUSE LIM and SH3 domain protein 1 (Fragment) OS=Mus musculus OX=10090 GN=Lasp1 PE=1 SV=1	11909	controllerType=0 controllerNumber=1 scan=9973	58.8532
05646:2	45	A.TKVGSPATVTFQ.Q			618.332	2	1235.66	1235.66	0	-5.7	2032	Non	341.94	188.89	188.89	8.8	2	>tr|A2A655|A2A655_MOUSE Bromodomain PHD finger transcription factor OS=Mus musculus OX=10090 GN=Bptf PE=1 SV=1	20002	controllerType=0 controllerNumber=1 scan=12206	64.0152
07381:2	45	A.TKVGSPATVTF.Q			554.303	2	1107.6	1107.6	0	-5.5	2032	Non	303.55	74.66	74.66	7.21	2	>tr|A2A655|A2A655_MOUSE Bromodomain PHD finger transcription factor OS=Mus musculus OX=10090 GN=Bptf PE=1 SV=1	20002	controllerType=0 controllerNumber=1 scan=14457	69.3531
08160:2	268	T.IYRELEQSI.K			575.806	2	1150.61	1150.61	0	-4.5	93	Non	340.09	42.8	42.8	4.84	2	>tr|A0A2R8W6S4|A0A2R8W6S4_MOUSE Protein kinase C and casein kinase substrate in neurons protein 2 (Fragment) OS=Mus musculus OX=10090 GN=Pacsin2 PE=1 SV=1	14036	controllerType=0 controllerNumber=1 scan=15469	71.6905
09969:2	203	R.TVQPSQAPYPTQL.F			715.366	2	1429.72	1429.73	0	-5.3	333	CRagged	265.43	90.95	90.95	6.53	2	>tr|A0A2I3BPX9|A0A2I3BPX9_MOUSE ETS-related transcription factor Elf-1 OS=Mus musculus OX=10090 GN=Elf1 PE=1 SV=1	22232	controllerType=0 controllerNumber=1 scan=18885	85.0245
04073:2	203	R.TVQPSQAPYPTQ.L			658.825	2	1316.64	1316.65	0	-4.1	333	CRagged	243.77	45.48	45.48	3.08	2	>tr|A0A2I3BPX9|A0A2I3BPX9_MOUSE ETS-related transcription factor Elf-1 OS=Mus musculus OX=10090 GN=Elf1 PE=1 SV=1	22232	controllerType=0 controllerNumber=1 scan=10195	59.3919
08884:2	479	I.LGIMAGTAGISL.L			552.309	2	1103.61	1103.61	0	-2.4	11	Non	249.55	61.47	61.47	1.53	1	>tr|A0A286YDW5|A0A286YDW5_MOUSE Regulator of microtubule dynamics protein 2 (Fragment) OS=Mus musculus OX=10090 GN=Rmdn2 PE=1 SV=1	8450	controllerType=0 controllerNumber=1 scan=16430	73.9924
03760:2	443	R.GSYRGGSISVQVNS.V			705.848	2	1410.69	1410.7	0	-6.2	683	CRagged	207.42	60.91	60.91	1.95	2	>tr|A0A286YDV7|A0A286YDV7_MOUSE Nucleolar and coiled-body phosphoprotein 1 (Fragment) OS=Mus musculus OX=10090 GN=Nolc1 PE=1 SV=1	14116	controllerType=0 controllerNumber=1 scan=9789	58.3752
05938:2	62	V.SYNAIRTGL.V			497.767	2	994.527	994.532	0	-5	437	Non	365.97	83.44	83.44	7.57	2	>tr|A0A286YDI8|A0A286YDI8_MOUSE Sec24-related gene family, member C (S. cerevisiae) OS=Mus musculus OX=10090 GN=Sec24c PE=1 SV=1	21657	controllerType=0 controllerNumber=1 scan=12554	64.7377
08303:2	62	V.SYNAIRTGLV.R			547.301	2	1093.59	1093.6	0	-5.2	437	Non	291.58	85.48	85.48	6.25	2	>tr|A0A286YDI8|A0A286YDI8_MOUSE Sec24-related gene family, member C (S. cerevisiae) OS=Mus musculus OX=10090 GN=Sec24c PE=1 SV=1	21657	controllerType=0 controllerNumber=1 scan=15662	72.1568
07813:2	135	S.HVNDPYSLNPLH.A			703.343	2	1405.68	1405.69	0	-4.9	71	Non	377.89	232.97	232.97	8.36	1	>tr|A0A286YCU0|A0A286YCU0_MOUSE Transcription factor AP-2, alpha, isoform CRA_b OS=Mus musculus OX=10090 GN=Tfap2a PE=1 SV=1	3492	controllerType=0 controllerNumber=1 scan=15026	70.6958
11628:2	83	A.EYIKVITGL.L			518.306	2	1035.6	1035.61	0	-4.6	1595	Non	364.35	151.53	151.53	7.84	2	>tr|A0A1Y7VLS3|A0A1Y7VLS3_MOUSE TOG array regulator of axonemal microtubules protein 1 OS=Mus musculus OX=10090 GN=Togaram1 PE=1 SV=1	7932	controllerType=0 controllerNumber=1 scan=21554	94.3426
10456:2	83	E.YIKVITGL.L			453.784	2	906.56	906.566	0	-6	1596	Non	306.82	47.03	47.03	4.46	2	>tr|A0A1Y7VLS3|A0A1Y7VLS3_MOUSE TOG array regulator of axonemal microtubules protein 1 OS=Mus musculus OX=10090 GN=Togaram1 PE=1 SV=1	7932	controllerType=0 controllerNumber=1 scan=19598	87.1436
02999:2	357	K.TNLSGRQSPSF.K			597.296	2	1193.58	1193.59	0	-5.3	103	CRagged	282.85	65.58	65.58	3.36	1	>tr|A0A1Y7VJG9|A0A1Y7VJG9_MOUSE Serine/threonine-protein phosphatase 4 regulatory subunit 3A (Fragment) OS=Mus musculus OX=10090 GN=Ppp4r3a PE=1 SV=1	8507	controllerType=0 controllerNumber=1 scan=8841	56.1559
06198:2	99	Q.TNYPSSDNSLYTN.A			738.315	2	1475.62	1475.63	0	-4.3	77	Non	290.8	149.43	149.43	8.1	4	>tr|A0A1W2P7P4|A0A1W2P7P4_MOUSE Protein max OS=Mus musculus OX=10090 GN=Max PE=1 SV=1	22870	controllerType=0 controllerNumber=1 scan=12884	65.488
07182:2	99	Q.TNYPSSDNSLYT.N			681.292	2	1361.58	1361.59	0	-6.3	77	Non	158.64	40.35	40.35	3.06	4	>tr|A0A1W2P7P4|A0A1W2P7P4_MOUSE Protein max OS=Mus musculus OX=10090 GN=Max PE=1 SV=1	22870	controllerType=0 controllerNumber=1 scan=14192	68.7324
03988:2	99	N.SLYTNAKGGTISA.F			641.832	2	1282.66	1282.66	0	-5.3	85	Non	150.77	22.3	22.3	2.23	4	>tr|A0A1W2P7P4|A0A1W2P7P4_MOUSE Protein max OS=Mus musculus OX=10090 GN=Max PE=1 SV=1	22870	controllerType=0 controllerNumber=1 scan=10083	59.1181
08193:2	99	Q.TNYPSSDNSLY.T			630.77	2	1260.53	1260.54	0	-4.3	77	Non	144.02	55.83	55.83	2.16	4	>tr|A0A1W2P7P4|A0A1W2P7P4_MOUSE Protein max OS=Mus musculus OX=10090 GN=Max PE=1 SV=1	22870	controllerType=0 controllerNumber=1 scan=15521	71.8493
06654:2	56	D.DYNRIGSSL.Y			512.754	2	1024.5	1024.51	0	-4.8	128	Non	424.55	102.99	102.99	7.41	3	>tr|A0A1W2P701|A0A1W2P701_MOUSE Sorting nexin-6 OS=Mus musculus OX=10090 GN=Snx6 PE=1 SV=1	11265	controllerType=0 controllerNumber=1 scan=13495	67.0164
09321:2	56	D.DYNRIGSSLY.A			594.283	2	1187.56	1187.57	0	-8.2	128	Non	393.44	160.65	160.65	7.33	3	>tr|A0A1W2P701|A0A1W2P701_MOUSE Sorting nexin-6 OS=Mus musculus OX=10090 GN=Snx6 PE=1 SV=1	11265	controllerType=0 controllerNumber=1 scan=17239	77.096
10068:2	172	P.HSVIGGSLGSF.M			530.772	2	1060.54	1060.54	0	-5.6	41	Non	322.99	108.14	108.14	7.72	1	>tr|A0A1L1SUS7|A0A1L1SUS7_MOUSE Cyclin-dependent kinase 17 (Fragment) OS=Mus musculus OX=10090 GN=Cdk17 PE=1 SV=1	23513	controllerType=0 controllerNumber=1 scan=19027	85.4278
06879:2	318	L.SFHPSGNYL.I			511.237	2	1021.47	1021.47	0	-7.2	198	Non	348.22	136.38	136.38	4.24	1	>tr|A0A1L1SUQ2|A0A1L1SUQ2_MOUSE POC1 centriolar protein homolog A OS=Mus musculus OX=10090 GN=Poc1a PE=1 SV=1	458	controllerType=0 controllerNumber=1 scan=13809	67.8669
04959:2	105	K.HTGPGILSM[+15.995]ANAGPN.T		M[+16]	726.845	2	1452.68	1452.69	0	-5.4	84	CRagged	404.5	131.76	131.76	8.7	1	>tr|A0A1L1SST0|A0A1L1SST0_MOUSE Peptidyl-prolyl cis-trans isomerase OS=Mus musculus OX=10090 GN=Ppia PE=1 SV=1	26608	controllerType=0 controllerNumber=1 scan=11318	61.9852
05450:2	498	L.SYEKQDTLL.K			548.777	2	1096.55	1096.55	0	-4.8	10	Non	308.56	14.35	14.35	1.37	1	>tr|A0A1L1SSD1|A0A1L1SSD1_MOUSE Dolichyl-diphosphooligosaccharide--protein glycosyltransferase subunit STT3A OS=Mus musculus OX=10090 GN=Stt3a PE=4 SV=1	15781	controllerType=0 controllerNumber=1 scan=11954	63.4321
11674:2	254	E.AYNPSNGSWL.R			554.752	2	1108.5	1108.51	0	-7.9	340	Non	321.03	81	81	4.96	3	>tr|A0A1L1SS10|A0A1L1SS10_MOUSE Kelch-like ECH-associated protein 1 OS=Mus musculus OX=10090 GN=Keap1 PE=1 SV=1	5956	controllerType=0 controllerNumber=1 scan=21654	94.8165
05275:2	298	S.KYNPVGASEL.R			539.279	2	1077.55	1077.56	0	-5.3	400	Non	310.19	63.29	63.29	3.78	2	>tr|A0A1L1SRX2|A0A1L1SRX2_MOUSE AMP deaminase OS=Mus musculus OX=10090 GN=Ampd3 PE=1 SV=1	8050	controllerType=0 controllerNumber=1 scan=11722	62.8939
09988:2	298	D.LYLKTENYL.G			578.812	2	1156.62	1156.62	0	-7	412	Non	303.59	12.62	12.62	1.79	2	>tr|A0A1L1SRX2|A0A1L1SRX2_MOUSE AMP deaminase OS=Mus musculus OX=10090 GN=Ampd3 PE=1 SV=1	8050	controllerType=0 controllerNumber=1 scan=18914	85.1104
08174:2	342	A.HQQPPSPLPVYS.S			675.343	2	1349.68	1349.68	0	-4.5	78	Non	229.88	98.64	98.64	3.83	1	>tr|A0A1D5RMM8|A0A1D5RMM8_MOUSE Paxillin OS=Mus musculus OX=10090 GN=Pxn PE=1 SV=1	32487	controllerType=0 controllerNumber=1 scan=15491	71.7602
04446:2	377	S.SVTEQVAGLKEE.Q			645.33	2	1289.65	1289.66	0	-5.2	303	Non	240.1	56.44	56.44	3.12	1	>tr|A0A1D5RMH2|A0A1D5RMH2_MOUSE Potassium channel subfamily K member OS=Mus musculus OX=10090 GN=Kcnk1 PE=1 SV=1	24434	controllerType=0 controllerNumber=1 scan=10662	60.471
05703:2	185	N.TVLSSGLTAAR.-			538.305	2	1075.6	1075.61	0	-7.5	111	NRagged	488.33	176.38	176.38	7.54	1	>tr|A0A1D5RM55|A0A1D5RM55_MOUSE Casein kinase II subunit alpha' (Fragment) OS=Mus musculus OX=10090 GN=Csnk2a2 PE=1 SV=1	23816	controllerType=0 controllerNumber=1 scan=12273	64.1488
04950:2	233	T.SGHTQYQSVPVYE.M			747.843	2	1494.68	1494.69	0	-5.3	825	Non	244.39	115.69	115.69	5.53	1	>tr|A0A1D5RLL3|A0A1D5RLL3_MOUSE Protein EFR3 homolog A OS=Mus musculus OX=10090 GN=Efr3a PE=1 SV=1	22693	controllerType=0 controllerNumber=1 scan=11308	61.9643
09575:2	22	K.TAPLPPAGQATTFQ.M			700.361	2	1399.72	1399.72	0	-4.6	906	CRagged	407.87	169.05	169.05	8.96	6	>tr|A0A1B0GSX7|A0A1B0GSX7_MOUSE Nuclear pore complex protein Nup98-Nup96 OS=Mus musculus OX=10090 GN=Nup98 PE=1 SV=1	16566	controllerType=0 controllerNumber=1 scan=18285	83.2064
12953:2	22	K.SFGTPFGGSTGGFG.T			638.281	2	1275.56	1275.56	0	-6.9	5	CRagged	367.23	153.6	153.6	8.82	6	>tr|A0A1B0GSX7|A0A1B0GSX7_MOUSE Nuclear pore complex protein Nup98-Nup96 OS=Mus musculus OX=10090 GN=Nup98 PE=1 SV=1	16566	controllerType=0 controllerNumber=1 scan=24041	105.035
11542:2	22	Y.SPFGDSPLFR.N			561.778	2	1122.55	1122.56	0	-8.4	511	NRagged	300.73	84.77	84.77	5.46	6	>tr|A0A1B0GSX7|A0A1B0GSX7_MOUSE Nuclear pore complex protein Nup98-Nup96 OS=Mus musculus OX=10090 GN=Nup98 PE=1 SV=1	16566	controllerType=0 controllerNumber=1 scan=21395	93.6529
08130:2	22	G.TASTGTSLFSSQNN.A			707.822	2	1414.64	1414.64	0	-5	94	Non	214.21	59.56	59.56	3.17	6	>tr|A0A1B0GSX7|A0A1B0GSX7_MOUSE Nuclear pore complex protein Nup98-Nup96 OS=Mus musculus OX=10090 GN=Nup98 PE=1 SV=1	16566	controllerType=0 controllerNumber=1 scan=15429	71.6019
09545:2	22	G.TPFGGSTGGFGTTST.F			687.809	2	1374.61	1374.62	0	-4.8	8	Non	158.86	1.78	1.78	2.15	6	>tr|A0A1B0GSX7|A0A1B0GSX7_MOUSE Nuclear pore complex protein Nup98-Nup96 OS=Mus musculus OX=10090 GN=Nup98 PE=1 SV=1	16566	controllerType=0 controllerNumber=1 scan=18239	83.0722
12073:2	22	G.TSAFGSSNNTGGLFG.N			708.818	2	1416.63	1416.64	0	-6.8	39	Non	192.37	19.4	19.4	2.15	6	>tr|A0A1B0GSX7|A0A1B0GSX7_MOUSE Nuclear pore complex protein Nup98-Nup96 OS=Mus musculus OX=10090 GN=Nup98 PE=1 SV=1	16566	controllerType=0 controllerNumber=1 scan=22377	97.8948
05974:2	157	V.SLIGSKTQI.P			473.779	2	946.551	946.557	0	-5.6	85	Non	379.65	93.15	93.15	7.91	1	>tr|A0A1B0GS70|A0A1B0GS70_MOUSE Proteasome endopeptidase complex OS=Mus musculus OX=10090 GN=Psma1 PE=1 SV=1	68	controllerType=0 controllerNumber=1 scan=12598	64.8344
10825:2	124	F.TEVLKTNGLLV.-			593.852	2	1186.7	1186.7	0	-6	436	Non	376.1	105.67	105.67	8.02	2	>tr|A0A1B0GS68|A0A1B0GS68_MOUSE Uncharacterized protein OS=Mus musculus OX=10090 GN=Gm45713 PE=2 SV=1	2038	controllerType=0 controllerNumber=1 scan=20159	88.9668
05160:2	124	W.KYQAVTATL.E			497.78	2	994.552	994.557	0	-4.4	391	Non	238.99	19.42	19.42	2.88	2	>tr|A0A1B0GS68|A0A1B0GS68_MOUSE Uncharacterized protein OS=Mus musculus OX=10090 GN=Gm45713 PE=2 SV=1	2038	controllerType=0 controllerNumber=1 scan=11570	62.5244
08186:2	244	Q.SLPALDPRLH.R			559.816	2	1118.62	1118.63	0	-6.2	886	Non	327.16	141.48	141.48	5.28	2	>tr|A0A1B0GRU3|A0A1B0GRU3_MOUSE Zinc finger CCCH domain-containing protein 4 OS=Mus musculus OX=10090 GN=Zc3h4 PE=1 SV=1	7366	controllerType=0 controllerNumber=1 scan=15512	71.8284
08336:2	103	L.TQSPAILSVSPGER.V			721.382	2	1441.76	1441.76	0	-5.9	25	NRagged	422.48	263.55	263.55	9.31	1	>tr|A0A140T8N2|A0A140T8N2_MOUSE Protein Igkv5-48 (Fragment) OS=Mus musculus OX=10090 GN=Igkv5-48 PE=1 SV=2	23958	controllerType=0 controllerNumber=1 scan=15704	72.2506
09086:2	20	M.TQSPSSLSASLGE.R			632.303	2	1263.6	1263.61	0	-6.7	27	Non	455.46	151.41	151.41	9.37	3	>tr|A0A140T8N0|A0A140T8N0_MOUSE Immunoglobulin kappa chain variable 9-120 (Fragment) OS=Mus musculus OX=10090 GN=Igkv9-120 PE=1 SV=2	8690	controllerType=0 controllerNumber=1 scan=16706	74.6958
05076:2	20	M.TQSPSSLSASLGER.V			710.354	2	1419.7	1419.71	0	-4.5	27	NRagged	367.39	183.4	183.4	8.74	3	>tr|A0A140T8N0|A0A140T8N0_MOUSE Immunoglobulin kappa chain variable 9-120 (Fragment) OS=Mus musculus OX=10090 GN=Igkv9-120 PE=1 SV=2	8690	controllerType=0 controllerNumber=1 scan=11467	62.3148
12952:2	20	R.SGSDYSLTISSL.E			615.295	2	1229.58	1229.59	0	-6	89	CRagged	328.87	92.46	92.46	7.12	3	>tr|A0A140T8N0|A0A140T8N0_MOUSE Immunoglobulin kappa chain variable 9-120 (Fragment) OS=Mus musculus OX=10090 GN=Igkv9-120 PE=1 SV=2	8690	controllerType=0 controllerNumber=1 scan=24040	105.033
06704:2	38	K.TLAEGVPSRFSGSG.S			682.84	2	1364.67	1364.68	0	-5.3	73	CRagged	435.88	191.1	191.1	8.85	2	>tr|A0A140T8M2|A0A140T8M2_MOUSE Immunoglobulin kappa variable 12-44 (Fragment) OS=Mus musculus OX=10090 GN=Igkv12-44 PE=4 SV=2	23584	controllerType=0 controllerNumber=1 scan=13590	67.3717
06932:2	38	K.TLAEGVPSRFSGS.G			654.33	2	1307.65	1307.66	0	-5.6	73	CRagged	345.02	143.32	143.32	8.15	2	>tr|A0A140T8M2|A0A140T8M2_MOUSE Immunoglobulin kappa variable 12-44 (Fragment) OS=Mus musculus OX=10090 GN=Igkv12-44 PE=4 SV=2	23584	controllerType=0 controllerNumber=1 scan=13877	68.0126
07611:2	300	R.PDKISGADINSI.C			615.319	2	1229.63	1229.64	0	-4.7	336	CRagged	234.07	88.73	88.73	4.55	1	>tr|A0A140LIZ5|A0A140LIZ5_MOUSE 26S proteasome regulatory subunit 6B OS=Mus musculus OX=10090 GN=Psmc4 PE=1 SV=1	14868	controllerType=0 controllerNumber=1 scan=14758	70.0683
10290:2	287	P.SSVSFADDFVR.S			615.289	2	1229.57	1229.58	0	-7.2	137	NRagged	302.44	119.02	119.02	4.53	2	>tr|A0A140LHR4|A0A140LHR4_MOUSE Serpin H1 (Fragment) OS=Mus musculus OX=10090 GN=Serpinh1 PE=1 SV=1	16731	controllerType=0 controllerNumber=1 scan=19348	86.374
07459:2	299	G.RYLEAGAAGL.R			510.775	2	1020.54	1020.55	0	-4.6	195	Non	341.48	65.67	65.67	4.58	1	>tr|A0A0U1RQ49|A0A0U1RQ49_MOUSE Hsp70-binding protein 1 (Fragment) OS=Mus musculus OX=10090 GN=Hspbp1 PE=1 SV=1	8332	controllerType=0 controllerNumber=1 scan=14566	69.6347
04167:2	163	A.TLEAGSVAAGTGSE.-			625.295	2	1249.58	1249.59	0	-6.2	7	Non	320.31	125.6	125.6	7.8	1	>tr|A0A0U1RQ17|A0A0U1RQ17_MOUSE Transmembrane protein 238 (Fragment) OS=Mus musculus OX=10090 GN=Tmem238 PE=1 SV=1	7893	controllerType=0 controllerNumber=1 scan=10315	59.6702
06219:2	468	V.GLGPQRVSGL.A			492.282	2	983.558	983.563	0	-5.7	16	Non	259.12	47.14	47.14	1.66	1	>tr|A0A0U1RP59|A0A0U1RP59_MOUSE Interferon-stimulated gene 20 kDa protein OS=Mus musculus OX=10090 GN=Isg20 PE=1 SV=1	77	controllerType=0 controllerNumber=1 scan=12909	65.5434
06604:2	133	M.SQRVIAPNPAQLQ.G			711.394	2	1421.78	1421.79	0	-3.3	15	Non	361.64	196.45	196.45	8.08	3	>tr|A0A0U1RNM2|A0A0U1RNM2_MOUSE Transcriptional repressor p66-beta (Fragment) OS=Mus musculus OX=10090 GN=Gatad2b PE=1 SV=1	24731	controllerType=0 controllerNumber=1 scan=13430	66.8698
03326:2	133	A.TNTTLPHM[+15.995]LM[+15.995].S		M[+16]*2	595.776	2	1190.55	1190.55	0	-7.9	5	Non	214.83	21.82	21.82	1.89	3	>tr|A0A0U1RNM2|A0A0U1RNM2_MOUSE Transcriptional repressor p66-beta (Fragment) OS=Mus musculus OX=10090 GN=Gatad2b PE=1 SV=1	24731	controllerType=0 controllerNumber=1 scan=9249	57.1111
04988:2	133	A.TNTTLPHM[+15.995]L.M		M[+16]	522.26	2	1043.51	1043.52	0	-5.9	5	Non	215.48	32.64	32.64	1.85	3	>tr|A0A0U1RNM2|A0A0U1RNM2_MOUSE Transcriptional repressor p66-beta (Fragment) OS=Mus musculus OX=10090 GN=Gatad2b PE=1 SV=1	24731	controllerType=0 controllerNumber=1 scan=11353	62.0568
06204:2	403	K.SLNPAVYRNVE.Y			631.327	2	1261.65	1261.65	0	-5.3	248	CRagged	266.49	60.18	60.18	2.67	1	>tr|A0A0R4J260|A0A0R4J260_MOUSE OTU domain-containing protein 4 OS=Mus musculus OX=10090 GN=Otud4 PE=1 SV=1	36161	controllerType=0 controllerNumber=1 scan=12891	65.5034
05461:2	168	Q.SYYAVAHAV.T			490.743	2	980.479	980.484	0	-5.1	730	Non	319.57	129.04	129.04	7.08	2	>tr|A0A0R4J170|A0A0R4J170_MOUSE Transcription activator BRG1 OS=Mus musculus OX=10090 GN=Smarca4 PE=1 SV=1	10346	controllerType=0 controllerNumber=1 scan=11968	63.4635
12583:2	168	D.EYVANLTEL.V			526.266	2	1051.52	1051.53	0	-5.5	559	Non	288.61	3.19	3.19	2.94	2	>tr|A0A0R4J170|A0A0R4J170_MOUSE Transcription activator BRG1 OS=Mus musculus OX=10090 GN=Smarca4 PE=1 SV=1	10346	controllerType=0 controllerNumber=1 scan=23358	102.312
08599:2	278	K.TLM[+15.995]SPLGITR.I		M[+16]	552.804	2	1104.6	1104.61	0	-6.2	319	Specific	331.62	109.08	109.08	4.32	1	>tr|A0A0R4J0X5|A0A0R4J0X5_MOUSE Alpha-1-antitrypsin 1-3 OS=Mus musculus OX=10090 GN=Serpina1c PE=1 SV=1	22456	controllerType=0 controllerNumber=1 scan=16045	73.0439
09325:2	76	K.TYQDIQNTI.K			548.267	2	1095.53	1095.53	0	-5	698	CRagged	455.03	142.49	142.49	7.26	4	>tr|A0A0R4J0V5|A0A0R4J0V5_MOUSE DNA-directed RNA polymerase subunit OS=Mus musculus OX=10090 GN=Polr2a PE=1 SV=1	21667	controllerType=0 controllerNumber=1 scan=17340	77.8379
05078:2	76	I.SYLEM[+15.995]GHDI.T		M[+16]	540.734	2	1080.46	1080.47	0	-5.2	656	Non	318.81	52.73	52.73	5.22	4	>tr|A0A0R4J0V5|A0A0R4J0V5_MOUSE DNA-directed RNA polymerase subunit OS=Mus musculus OX=10090 GN=Polr2a PE=1 SV=1	21667	controllerType=0 controllerNumber=1 scan=11470	62.3194
10986:2	76	R.LPSDLHPIK.V			510.295	2	1019.58	1019.59	0	-5	1000	Specific	267.36	9.11	9.11	1.93	4	>tr|A0A0R4J0V5|A0A0R4J0V5_MOUSE DNA-directed RNA polymerase subunit OS=Mus musculus OX=10090 GN=Polr2a PE=1 SV=1	21667	controllerType=0 controllerNumber=1 scan=20440	89.9851
04739:2	302	V.DYIKGGTQL.N			497.76	2	994.514	994.52	0	-6.7	290	Non	320.8	61.17	61.17	4.53	1	>tr|A0A0R4J0J1|A0A0R4J0J1_MOUSE Copine-9 OS=Mus musculus OX=10090 GN=Cpne9 PE=1 SV=1	10972	controllerType=0 controllerNumber=1 scan=11026	61.2876
05725:2	259	K.TLPGELSKGAVQ.A			600.331	2	1199.65	1199.66	0	-7.4	73	CRagged	290.53	101.45	101.45	5.18	1	>tr|A0A0N4SW16|A0A0N4SW16_MOUSE Probable 28S rRNA (cytosine-C(5))-methyltransferase (Fragment) OS=Mus musculus OX=10090 GN=Nop2 PE=1 SV=1	8755	controllerType=0 controllerNumber=1 scan=12297	64.1953
12158:2	363	A.AYQSIQSYL.R			536.766	2	1072.52	1072.53	0	-5.7	390	Non	256.44	82.89	82.89	3.3	1	>tr|A0A0N4SV08|A0A0N4SV08_MOUSE alpha-1,2-Mannosidase OS=Mus musculus OX=10090 GN=Edem1 PE=1 SV=1	31249	controllerType=0 controllerNumber=1 scan=22540	98.6456
10040:2	411	T.GYLKGYTLV.E			507.284	2	1013.56	1013.57	0	-6.3	111	Non	299.8	41.34	41.34	2.57	1	>tr|A0A0N4SUH6|A0A0N4SUH6_MOUSE RNA-binding protein 8A OS=Mus musculus OX=10090 GN=Rbm8a2 PE=3 SV=1	26578	controllerType=0 controllerNumber=1 scan=18986	85.3004
08144:2	308	C.GYYNTAVKL.A			514.772	2	1028.54	1028.54	0	-4.8	131	Non	345.12	63.56	63.56	4.36	1	>tr|A0A0J9YVB4|A0A0J9YVB4_MOUSE Macrophage erythroblast attacher (Fragment) OS=Mus musculus OX=10090 GN=Maea PE=1 SV=1	26452	controllerType=0 controllerNumber=1 scan=15447	71.6405
12020:2	153	H.TYLPAHIPYQEL.N			722.873	2	1444.74	1444.75	0	-6.3	342	Non	286.71	143.85	143.85	7.98	1	>tr|A0A0J9YUG8|A0A0J9YUG8_MOUSE Cytospin-B OS=Mus musculus OX=10090 GN=Specc1 PE=1 SV=1	15966	controllerType=0 controllerNumber=1 scan=22277	97.4452
09984:2	422	E.GYAESLNQL.F			497.743	2	994.478	994.484	0	-5.8	847	Non	273.34	53.06	53.06	2.5	2	>tr|A0A0J9YUC4|A0A0J9YUC4_MOUSE Unconventional myosin-Ih OS=Mus musculus OX=10090 GN=Myo1h PE=1 SV=1	13002	controllerType=0 controllerNumber=1 scan=18907	85.0831
11940:2	280	S.SVPLPAENVTITAG.Q			684.868	2	1368.73	1368.74	0	-6	266	Non	232.28	82.75	82.75	4.87	1	>tr|A0A0H2UH17|A0A0H2UH17_MOUSE Ubiquitin associated protein 2-like, isoform CRA_b OS=Mus musculus OX=10090 GN=Ubap2l PE=1 SV=1	28096	controllerType=0 controllerNumber=1 scan=22128	96.7853
09636:2	167	R.TPGNRIVYLYT.K			648.848	2	1296.69	1296.69	0	-5.2	25	CRagged	262.8	93.64	93.64	6.33	2	>tr|A0A0G2JGY8|A0A0G2JGY8_MOUSE 60S ribosomal protein L34 (Fragment) OS=Mus musculus OX=10090 GN=Rpl34 PE=1 SV=4	30541	controllerType=0 controllerNumber=1 scan=18380	83.4996
09683:2	167	R.TPGNRIVYLY.T			598.324	2	1195.64	1195.65	0	-5.7	25	CRagged	256.25	39.91	39.91	3.76	2	>tr|A0A0G2JGY8|A0A0G2JGY8_MOUSE 60S ribosomal protein L34 (Fragment) OS=Mus musculus OX=10090 GN=Rpl34 PE=1 SV=4	30541	controllerType=0 controllerNumber=1 scan=18452	83.7122
07476:2	475	E.SLAGASQPPYNPT.Y			651.817	2	1302.63	1302.63	0	-3.8	112	Non	211.89	75.28	75.28	1.58	1	>tr|A0A0G2JGK4|A0A0G2JGK4_MOUSE Protein shisa-5 OS=Mus musculus OX=10090 GN=Shisa5 PE=4 SV=1	4198	controllerType=0 controllerNumber=1 scan=14588	69.693
11691:2	276	K.SYEILLHEV.P			551.789	2	1102.57	1102.58	0	-6.7	32	CRagged	328.55	97.06	97.06	4.9	2	>tr|A0A0G2JGG7|A0A0G2JGG7_MOUSE Krev interaction trapped protein 1 OS=Mus musculus OX=10090 GN=Krit1 PE=1 SV=1	15224	controllerType=0 controllerNumber=1 scan=21684	94.945
07059:2	388	L.NYFPSKQDI.L			556.271	2	1111.53	1111.54	0	-6.3	128	Non	318.84	64.45	64.45	2.82	1	>tr|A0A0G2JG40|A0A0G2JG40_MOUSE Guanine nucleotide-binding protein subunit alpha-12 (Fragment) OS=Mus musculus OX=10090 GN=Gna12 PE=1 SV=1	15481	controllerType=0 controllerNumber=1 scan=14033	68.3616
03878:2	367	M.TQTTSSLSASLGDR.V			712.351	2	1423.7	1423.7	0	-4.9	25	NRagged	195.53	73.56	73.56	3.23	1	>tr|A0A0G2JFY3|A0A0G2JFY3_MOUSE Immunoglobulin kappa variable 10-95 (Fragment) OS=Mus musculus OX=10090 GN=Igkv10-95 PE=4 SV=4	14230	controllerType=0 controllerNumber=1 scan=9943	58.7778
02805:3	459	A.TTVSAPDLKSVR.S			425.24	3	1273.7	1273.71	0	-5	1359	NRagged	186.95	91.81	91.81	1.77	1	>tr|A0A0G2JFH2|A0A0G2JFH2_MOUSE Microtubule-associated protein (Fragment) OS=Mus musculus OX=10090 GN=Map4 PE=1 SV=1	10084	controllerType=0 controllerNumber=1 scan=8581	55.4937
04609:2	93	G.SGLNPSIQKASNY.R			689.847	2	1378.69	1378.7	0	-6.9	272	Non	376.55	174.21	174.21	9.47	2	>tr|A0A0G2JFF1|A0A0G2JFF1_MOUSE Serine/threonine-protein phosphatase (Fragment) OS=Mus musculus OX=10090 GN=Ppp1cc PE=1 SV=1	9695	controllerType=0 controllerNumber=1 scan=10861	60.9112
07311:2	384	D.SYNRLKSLI.E			547.319	2	1093.63	1093.64	0	-5	343	Non	319.86	91.71	91.71	3.09	1	>tr|A0A0G2JEA5|A0A0G2JEA5_MOUSE Uncharacterized protein OS=Mus musculus OX=10090 GN=Gm43738 PE=4 SV=1	33324	controllerType=0 controllerNumber=1 scan=14370	69.1679
10686:2	191	D.KFFQTPEGL.T			533.778	2	1066.55	1066.56	0	-6.9	45	Non	417.13	97.27	97.27	7.48	1	>tr|A0A0G2JDH4|A0A0G2JDH4_MOUSE Krueppel-like factor 3 (Fragment) OS=Mus musculus OX=10090 GN=Klf3 PE=1 SV=1	35958	controllerType=0 controllerNumber=1 scan=19933	88.1453
04702:2	250	H.SLPSARTDEQAL.L			644.327	2	1287.65	1287.65	0	-5.1	42	Non	241.35	79.19	79.19	5.32	1	>tr|A0A0A6YX02|A0A0A6YX02_MOUSE Ragulator complex protein LAMTOR1 OS=Mus musculus OX=10090 GN=Lamtor1 PE=1 SV=1	14477	controllerType=0 controllerNumber=1 scan=10980	61.1858
10440:2	235	Q.VYIITKPEL.Q			538.32	2	1075.63	1075.64	0	-6.2	42	Non	322.96	75.72	75.72	5.49	1	>tr|A0A0A6YWX8|A0A0A6YWX8_MOUSE GATOR complex protein NPRL2 OS=Mus musculus OX=10090 GN=Nprl2 PE=1 SV=1	35061	controllerType=0 controllerNumber=1 scan=19575	87.08
12966:2	2	N.TQPIMDTDGSYFV.Y			737.327	2	1473.65	1473.66	0	-6.7	271	Non	508.26	334.27	334.27	10.21	16	>tr|A0A0A6YWR2|A0A0A6YWR2_MOUSE Ig gamma-1 chain C region secreted form (Fragment) OS=Mus musculus OX=10090 GN=Ighg1 PE=1 SV=1	8877	controllerType=0 controllerNumber=1 scan=24056	105.06
11742:2	2	N.TQPIM[+15.995]DTDGSYFV.Y		M[+16]	745.325	2	1489.64	1489.65	0	-5.6	271	Non	502.19	338.15	338.15	9.87	16	>tr|A0A0A6YWR2|A0A0A6YWR2_MOUSE Ig gamma-1 chain C region secreted form (Fragment) OS=Mus musculus OX=10090 GN=Ighg1 PE=1 SV=1	8877	controllerType=0 controllerNumber=1 scan=21786	95.3841
09777:2	2	V.TWNSGSLSSGVHTF.P			740.343	2	1479.68	1479.69	0	-5.2	40	Non	374.07	160.75	160.75	9.46	16	>tr|A0A0A6YWR2|A0A0A6YWR2_MOUSE Ig gamma-1 chain C region secreted form (Fragment) OS=Mus musculus OX=10090 GN=Ighg1 PE=1 SV=1	8877	controllerType=0 controllerNumber=1 scan=18596	84.155
04135:2	2	N.TQPIM[+15.995]DTDGSY.F		M[+16]	622.258	2	1243.51	1243.51	0	-5.4	271	Non	520.64	225.26	225.26	8.99	16	>tr|A0A0A6YWR2|A0A0A6YWR2_MOUSE Ig gamma-1 chain C region secreted form (Fragment) OS=Mus musculus OX=10090 GN=Ighg1 PE=1 SV=1	8877	controllerType=0 controllerNumber=1 scan=10275	59.5717
10542:2	2	N.TQPIM[+15.995]DTDGSYF.V		M[+16]	695.791	2	1390.57	1390.58	0	-6.3	271	Non	355.35	212.34	212.34	8.85	16	>tr|A0A0A6YWR2|A0A0A6YWR2_MOUSE Ig gamma-1 chain C region secreted form (Fragment) OS=Mus musculus OX=10090 GN=Ighg1 PE=1 SV=1	8877	controllerType=0 controllerNumber=1 scan=19720	87.5061
11372:2	2	K.TTPPSVYPLAPG.S			600.315	2	1199.62	1199.63	0	-6.9	3	CRagged	459.67	151.48	151.48	8.58	16	>tr|A0A0A6YWR2|A0A0A6YWR2_MOUSE Ig gamma-1 chain C region secreted form (Fragment) OS=Mus musculus OX=10090 GN=Ighg1 PE=1 SV=1	8877	controllerType=0 controllerNumber=1 scan=21121	92.6832
11169:2	2	K.TTPPSVYPLAPGS.A			643.831	2	1286.66	1286.66	0	-5.5	3	CRagged	338.05	134.94	134.94	8.34	16	>tr|A0A0A6YWR2|A0A0A6YWR2_MOUSE Ig gamma-1 chain C region secreted form (Fragment) OS=Mus musculus OX=10090 GN=Ighg1 PE=1 SV=1	8877	controllerType=0 controllerNumber=1 scan=20750	91.1459
12303:2	2	F.SWFVDDVEVHT.A			667.302	2	1333.6	1333.61	0	-7.2	153	Non	476.33	240.44	240.44	8.27	16	>tr|A0A0A6YWR2|A0A0A6YWR2_MOUSE Ig gamma-1 chain C region secreted form (Fragment) OS=Mus musculus OX=10090 GN=Ighg1 PE=1 SV=1	8877	controllerType=0 controllerNumber=1 scan=22825	99.9155
11399:2	2	K.TTPPSVYPLAPGSA.A			679.348	2	1357.69	1357.7	0	-7.6	3	CRagged	366.33	165.61	165.61	7.99	16	>tr|A0A0A6YWR2|A0A0A6YWR2_MOUSE Ig gamma-1 chain C region secreted form (Fragment) OS=Mus musculus OX=10090 GN=Ighg1 PE=1 SV=1	8877	controllerType=0 controllerNumber=1 scan=21160	92.8057
08871:2	2	N.TQPIMDTDGSY.F			614.259	2	1227.51	1227.52	0	-7.8	271	Non	319.88	166.27	166.27	7.31	16	>tr|A0A0A6YWR2|A0A0A6YWR2_MOUSE Ig gamma-1 chain C region secreted form (Fragment) OS=Mus musculus OX=10090 GN=Ighg1 PE=1 SV=1	8877	controllerType=0 controllerNumber=1 scan=16416	73.963
12068:2	2	K.TTPPSVYPLAP.G			571.805	2	1142.6	1142.61	0	-6.4	3	CRagged	318.84	105.42	105.42	7.27	16	>tr|A0A0A6YWR2|A0A0A6YWR2_MOUSE Ig gamma-1 chain C region secreted form (Fragment) OS=Mus musculus OX=10090 GN=Ighg1 PE=1 SV=1	8877	controllerType=0 controllerNumber=1 scan=22369	97.8605
11362:2	2	K.TTPPSVYPLAPGSAA.Q			714.867	2	1428.73	1428.74	0	-6.8	3	CRagged	245.38	130.34	130.34	7.15	16	>tr|A0A0A6YWR2|A0A0A6YWR2_MOUSE Ig gamma-1 chain C region secreted form (Fragment) OS=Mus musculus OX=10090 GN=Ighg1 PE=1 SV=1	8877	controllerType=0 controllerNumber=1 scan=21103	92.6047
12097:2	2	F.SWFVDDVEVHTA.Q			702.82	2	1404.63	1404.64	0	-6.8	153	Non	229.65	69.23	69.23	4.45	16	>tr|A0A0A6YWR2|A0A0A6YWR2_MOUSE Ig gamma-1 chain C region secreted form (Fragment) OS=Mus musculus OX=10090 GN=Ighg1 PE=1 SV=1	8877	controllerType=0 controllerNumber=1 scan=22422	98.0946
04159:2	2	K.NTQPIM[+15.995]DTDGSY.F		M[+16]	679.279	2	1357.55	1357.56	0	-5.6	270	CRagged	224.81	77.88	77.88	3.76	16	>tr|A0A0A6YWR2|A0A0A6YWR2_MOUSE Ig gamma-1 chain C region secreted form (Fragment) OS=Mus musculus OX=10090 GN=Ighg1 PE=1 SV=1	8877	controllerType=0 controllerNumber=1 scan=10305	59.6457
12406:2	2	N.TQPIMDTDGSYF.V			687.795	2	1374.58	1374.59	0	-4.5	271	Non	157.71	37.79	37.79	2.26	16	>tr|A0A0A6YWR2|A0A0A6YWR2_MOUSE Ig gamma-1 chain C region secreted form (Fragment) OS=Mus musculus OX=10090 GN=Ighg1 PE=1 SV=1	8877	controllerType=0 controllerNumber=1 scan=23033	100.944
04775:2	2	V.TWNSGSLSSGVH.T			616.285	2	1231.56	1231.57	0	-5.8	40	Non	195.47	22.11	22.11	2.13	16	>tr|A0A0A6YWR2|A0A0A6YWR2_MOUSE Ig gamma-1 chain C region secreted form (Fragment) OS=Mus musculus OX=10090 GN=Ighg1 PE=1 SV=1	8877	controllerType=0 controllerNumber=1 scan=11074	61.4066
04839:2	213	K.SPPSAGSHQGPVIY.A			698.844	2	1396.68	1396.69	0	-3.4	232	CRagged	330.88	164.72	164.72	7.02	2	>tr|A0A0A6YWA2|A0A0A6YWA2_MOUSE Myelin protein zero-like protein 1 (Fragment) OS=Mus musculus OX=10090 GN=Mpzl1 PE=1 SV=1	9612	controllerType=0 controllerNumber=1 scan=11164	61.6317
05200:2	213	K.SPPSAGSHQGPVIYA.Q			734.361	2	1467.71	1467.72	0	-5.4	232	CRagged	169.2	9.54	9.54	2.14	2	>tr|A0A0A6YWA2|A0A0A6YWA2_MOUSE Myelin protein zero-like protein 1 (Fragment) OS=Mus musculus OX=10090 GN=Mpzl1 PE=1 SV=1	9612	controllerType=0 controllerNumber=1 scan=11626	62.6584
07354:2	249	G.SFPGSDGGVKLS.S			575.787	2	1150.57	1150.57	0	-6.2	887	Non	263.16	76.6	76.6	5.32	1	>tr|A0A0A6YW28|A0A0A6YW28_MOUSE Ubiquitin carboxyl-terminal hydrolase 4 OS=Mus musculus OX=10090 GN=Usp4 PE=1 SV=1	1473	controllerType=0 controllerNumber=1 scan=14422	69.2749
06768:2	90	Y.HEQLSVAEITN.A			620.809	2	1240.61	1240.62	0	-4.5	312	Non	253.23	72.9	72.9	6.24	2	>tr|A0A0A0MQA5|A0A0A0MQA5_MOUSE Tubulin alpha chain (Fragment) OS=Mus musculus OX=10090 GN=Tuba4a PE=1 SV=1	25546	controllerType=0 controllerNumber=1 scan=13679	67.5917
08931:2	90	A.TYAPVISAEKAY.H			656.84	2	1312.67	1312.68	0	-3.9	300	Non	270.15	63.79	63.79	5.87	2	>tr|A0A0A0MQA5|A0A0A0MQA5_MOUSE Tubulin alpha chain (Fragment) OS=Mus musculus OX=10090 GN=Tuba4a PE=1 SV=1	25546	controllerType=0 controllerNumber=1 scan=16490	74.1204
10662:2	320	N.YYDLVRTEI.A			586.3	2	1171.59	1171.6	0	-5.1	200	Non	298.43	74.15	74.15	4.18	2	>tr|A0A0A0MQ87|A0A0A0MQ87_MOUSE Son of sevenless homolog 2 OS=Mus musculus OX=10090 GN=Sos2 PE=1 SV=1	14303	controllerType=0 controllerNumber=1 scan=19894	88.0065
09357:2	226	I.NGPEIISKF.Y			502.773	2	1004.54	1004.54	0	-3.1	418	Non	413.93	130.37	130.37	5.7	1	>tr|A0A0A0MQ80|A0A0A0MQ80_MOUSE Spermatogenesis-associated protein 5 OS=Mus musculus OX=10090 GN=Spata5 PE=1 SV=1	17936	controllerType=0 controllerNumber=1 scan=17644	79.9185
05405:2	294	M.TQSRVLSSPQLA.Q			643.854	2	1286.7	1286.71	0	-4.8	3833	Non	254.55	41.7	41.7	4.65	3	>tr|A0A0A0MQ73|A0A0A0MQ73_MOUSE Histone-lysine N-methyltransferase 2D OS=Mus musculus OX=10090 GN=Kmt2d PE=1 SV=1	25418	controllerType=0 controllerNumber=1 scan=11891	63.281
11110:2	241	R.HGIVEDWDLM[+15.995]E.R		M[+16]	680.293	2	1359.58	1359.59	0	-7.7	29	CRagged	336.94	126.9	126.9	4.81	1	>tr|A0A087WS98|A0A087WS98_MOUSE Actin-related protein 3 (Fragment) OS=Mus musculus OX=10090 GN=Actr3 PE=1 SV=1	16034	controllerType=0 controllerNumber=1 scan=20644	90.7168
08482:2	221	M.TNAAATQPGTTILQ.Y			693.86	2	1386.71	1386.72	0	-6.6	196	Non	281.06	59.15	59.15	5.73	1	>tr|A0A087WRI6|A0A087WRI6_MOUSE Cyclic AMP-responsive element-binding protein 1 OS=Mus musculus OX=10090 GN=Creb1 PE=1 SV=1	6111	controllerType=0 controllerNumber=1 scan=15898	72.719
06562:2	231	V.GYVETPRGL.R			496.262	2	991.516	991.521	0	-4.7	112	Non	322.15	71.93	71.93	5.68	2	>tr|A0A087WQK0|A0A087WQK0_MOUSE 60S ribosomal protein L3 (Fragment) OS=Mus musculus OX=10090 GN=Rpl3 PE=1 SV=1	11555	controllerType=0 controllerNumber=1 scan=13355	66.599
13044:2	177	N.TPPILDSDGTYF.L			663.312	2	1325.62	1325.63	0	-7.4	277	Non	287.33	90.38	90.38	6.56	3	>tr|A0A075B5P5|A0A075B5P5_MOUSE Immunoglobulin heavy constant gamma 3 (Fragment) OS=Mus musculus OX=10090 GN=Ighg3 PE=4 SV=1	8919	controllerType=0 controllerNumber=1 scan=24142	105.196
07712:2	177	Q.TPQVYTIPPPRE.Q			699.37	2	1397.73	1397.74	0	-7.5	228	Non	223.71	47.81	47.81	3.07	3	>tr|A0A075B5P5|A0A075B5P5_MOUSE Immunoglobulin heavy constant gamma 3 (Fragment) OS=Mus musculus OX=10090 GN=Ighg3 PE=4 SV=1	8919	controllerType=0 controllerNumber=1 scan=14897	70.4146
12274:2	177	R.TVSSVLQSGFYS.L			637.812	2	1274.62	1274.63	0	-6.7	52	CRagged	170.02	49.65	49.65	2.24	3	>tr|A0A075B5P5|A0A075B5P5_MOUSE Immunoglobulin heavy constant gamma 3 (Fragment) OS=Mus musculus OX=10090 GN=Ighg3 PE=4 SV=1	8919	controllerType=0 controllerNumber=1 scan=22760	99.5695
11484:2	328	K.TTPPSVYPLAPGCG.D			680.33	2	1359.65	1359.66	0	-6.3	3	CRagged	214.29	82.85	82.85	2.86	1	>tr|A0A075B5P3|A0A075B5P3_MOUSE Immunoglobulin heavy constant gamma 2B (Fragment) OS=Mus musculus OX=10090 GN=Ighg2b PE=1 SV=1	12573	controllerType=0 controllerNumber=1 scan=21297	93.265
07955:2	427	G.SVPEHPSPSPLLS.S			673.847	2	1346.69	1346.69	0	-5.6	107	Non	222.76	44.63	44.63	2.4	1	>sp|Q9Z204|HNRPC_MOUSE Heterogeneous nuclear ribonucleoproteins C1/C2 OS=Mus musculus OX=10090 GN=Hnrnpc PE=1 SV=1	43055	controllerType=0 controllerNumber=1 scan=15203	71.0758
09335:2	94	K.TPLSSSLSQRLYN.L			733.382	2	1465.76	1465.76	0	-5.1	585	CRagged	523.27	318.11	318.11	9.42	1	>sp|Q9WVM1|RGAP1_MOUSE Rac GTPase-activating protein 1 OS=Mus musculus OX=10090 GN=Racgap1 PE=1 SV=1	36867	controllerType=0 controllerNumber=1 scan=17437	78.503
02217:2	372	N.SPPLKATM[+15.995]VPSSGD.-		M[+16]	701.844	2	1402.68	1402.69	0	-5.7	867	Non	201.63	74.62	74.62	2.67	2	>sp|Q9WU62|INCE_MOUSE Inner centromere protein OS=Mus musculus OX=10090 GN=Incenp PE=1 SV=2	42890	controllerType=0 controllerNumber=1 scan=7824	53.6772
09353:2	147	V.NFIGTKTVI.E			496.79	2	992.572	992.577	0	-5.1	110	Non	424.79	102.48	102.48	8.09	1	>sp|Q9R1J0|NSDHL_MOUSE Sterol-4-alpha-carboxylate 3-dehydrogenase, decarboxylating OS=Mus musculus OX=10090 GN=Nsdhl PE=1 SV=1	49649	controllerType=0 controllerNumber=1 scan=17633	79.864
09930:2	136	R.TPTPAGPTIM[+15.995]PLIR.Q		M[+16]	740.909	2	1480.81	1480.82	0	-5.1	243	Specific	342.62	203.21	203.21	7.77	1	>sp|Q9QYS9|QKI_MOUSE Protein quaking OS=Mus musculus OX=10090 GN=Qki PE=1 SV=1	37314	controllerType=0 controllerNumber=1 scan=18828	84.8531
11017:2	67	S.SPPAGPPPPPTPSLVG.L			734.392	2	1467.78	1467.78	0	-5.4	9	Non	242.63	102.31	102.31	7.98	2	>sp|Q9QYA2|TOM40_MOUSE Mitochondrial import receptor subunit TOM40 homolog OS=Mus musculus OX=10090 GN=Tomm40 PE=1 SV=3	43707	controllerType=0 controllerNumber=1 scan=20491	90.1543
10369:2	67	S.SPPAGPPPPPTPSL.V			656.347	2	1311.69	1311.69	0	-5.4	9	Non	232.18	70.01	70.01	5.77	2	>sp|Q9QYA2|TOM40_MOUSE Mitochondrial import receptor subunit TOM40 homolog OS=Mus musculus OX=10090 GN=Tomm40 PE=1 SV=3	43707	controllerType=0 controllerNumber=1 scan=19470	86.7638
07055:3	349	R.TQPKQLLVEDLK.A			471.275	3	1411.81	1411.82	0	-4.2	150	Specific	245.83	148.95	148.95	3.75	1	>sp|Q9QXV9|SPY1_MOUSE Protein sprouty homolog 1 OS=Mus musculus OX=10090 GN=Spry1 PE=2 SV=1	37231	controllerType=0 controllerNumber=1 scan=14027	68.3415
06082:2	338	R.HSSGTPASVGSLY.R			631.802	2	1262.6	1262.6	0	-4.3	282	CRagged	275.43	52.31	52.31	3.91	1	>sp|Q9QXV1|CBX8_MOUSE Chromobox protein homolog 8 OS=Mus musculus OX=10090 GN=Cbx8 PE=1 SV=1	50333	controllerType=0 controllerNumber=1 scan=12739	65.1644
06285:2	445	L.GYAKAINAL.K			460.761	2	920.515	920.52	0	-5.3	276	Non	307.69	53.47	53.47	2.12	1	>sp|Q9QXE2|DPOLL_MOUSE DNA polymerase lambda OS=Mus musculus OX=10090 GN=Poll PE=2 SV=1	46468	controllerType=0 controllerNumber=1 scan=12987	65.7069
09368:2	251	E.RYLPAPTAL.G			501.29	2	1001.57	1001.58	0	-5.9	956	Non	351.45	73.18	73.18	5.32	1	>sp|Q9JL70|FANCA_MOUSE Fanconi anemia group A protein homolog OS=Mus musculus OX=10090 GN=Fanca PE=2 SV=2	46133	controllerType=0 controllerNumber=1 scan=17709	80.3364
07596:2	65	Q.SLPPGLAVKDLK.-			619.376	2	1237.74	1237.75	0	-5.4	59	NRagged	466.63	239.65	239.65	7.9	2	>sp|Q9JJI8|RL38_MOUSE 60S ribosomal protein L38 OS=Mus musculus OX=10090 GN=Rpl38 PE=1 SV=3	53360	controllerType=0 controllerNumber=1 scan=14740	70.0265
10998:2	65	Q.SLPPGLAVKDL.K			555.329	2	1109.65	1109.66	0	-5.4	59	Non	246.93	47.87	47.87	5.28	2	>sp|Q9JJI8|RL38_MOUSE 60S ribosomal protein L38 OS=Mus musculus OX=10090 GN=Rpl38 PE=1 SV=3	53360	controllerType=0 controllerNumber=1 scan=20460	90.0532
03614:2	149	F.VYVATRPAVTE.-			603.327	2	1205.65	1205.65	0	-5.1	49	Non	437.53	187.34	187.34	7.96	1	>sp|Q9JIS3|SMCO4_MOUSE Single-pass membrane and coiled-coil domain-containing protein 4 OS=Mus musculus OX=10090 GN=Smco4 PE=3 SV=2	37626	controllerType=0 controllerNumber=1 scan=9610	57.9796
08312:2	257	G.SESVKSIFSSE.K			600.291	2	1199.57	1199.58	0	-4.1	2356	Non	313.04	106.4	106.4	5.04	3	>sp|Q9ERU9|RBP2_MOUSE E3 SUMO-protein ligase RanBP2 OS=Mus musculus OX=10090 GN=Ranbp2 PE=1 SV=2	36690	controllerType=0 controllerNumber=1 scan=15673	72.1829
06804:2	86	T.HSLGGGTGSGM[+15.995]GTLL.I		M[+16]	680.826	2	1360.64	1360.65	0	-5.6	137	Non	323.97	139.29	139.29	8.43	3	>sp|Q9ERD7|TBB3_MOUSE Tubulin beta-3 chain OS=Mus musculus OX=10090 GN=Tubb3 PE=1 SV=1	38908	controllerType=0 controllerNumber=1 scan=13720	67.6784
09480:2	86	A.TPTYGDLNHLVS.A			658.825	2	1316.64	1316.65	0	-4.2	219	Non	216.79	79.32	79.32	3.32	3	>sp|Q9ERD7|TBB3_MOUSE Tubulin beta-3 chain OS=Mus musculus OX=10090 GN=Tubb3 PE=1 SV=1	38908	controllerType=0 controllerNumber=1 scan=18120	82.6446
09332:2	159	A.SYSITVKEL.K			520.284	2	1039.56	1039.57	0	-5.4	177	Non	414.85	75.01	75.01	7.87	1	>sp|Q9EPN1|NBEA_MOUSE Neurobeachin OS=Mus musculus OX=10090 GN=Nbea PE=1 SV=1	47524	controllerType=0 controllerNumber=1 scan=17403	78.2659
12996:2	189	V.SFLETVNQL.H			525.773	2	1050.54	1050.55	0	-7.5	134	Non	448.33	132.54	132.54	7.53	1	>sp|Q9EP52|TWSG1_MOUSE Twisted gastrulation protein homolog 1 OS=Mus musculus OX=10090 GN=Twsg1 PE=1 SV=1	43661	controllerType=0 controllerNumber=1 scan=24089	105.115
09337:2	7	G.SNALSFSGGPGALR.A			667.343	2	1333.68	1333.69	0	-4.8	428	NRagged	734.24	461.24	461.24	13.41	11	>sp|Q9DCV7|K2C7_MOUSE Keratin, type II cytoskeletal 7 OS=Mus musculus OX=10090 GN=Krt7 PE=1 SV=1	41671	controllerType=0 controllerNumber=1 scan=17474	78.7705
08170:2	7	L.SFSGGPGALRAY.S			591.796	2	1182.58	1182.59	0	-4.7	432	Non	424.37	183.52	183.52	9.24	11	>sp|Q9DCV7|K2C7_MOUSE Keratin, type II cytoskeletal 7 OS=Mus musculus OX=10090 GN=Krt7 PE=1 SV=1	41671	controllerType=0 controllerNumber=1 scan=15486	71.7502
12321:2	7	G.SNALSFSGGPGAL.R			589.292	2	1177.58	1177.58	0	-6.7	428	Non	304.78	69.94	69.94	7.6	11	>sp|Q9DCV7|K2C7_MOUSE Keratin, type II cytoskeletal 7 OS=Mus musculus OX=10090 GN=Krt7 PE=1 SV=1	41671	controllerType=0 controllerNumber=1 scan=22868	100.177
08114:2	7	N.STGGNGGKLIF.G			525.78	2	1050.55	1050.56	0	-5.5	412	Non	320.69	70.82	70.82	7.21	11	>sp|Q9DCV7|K2C7_MOUSE Keratin, type II cytoskeletal 7 OS=Mus musculus OX=10090 GN=Krt7 PE=1 SV=1	41671	controllerType=0 controllerNumber=1 scan=15402	71.5121
06849:2	7	N.STGGNGGKLIFGGTM[+15.995]G.S		M[+16]	735.35	2	1469.69	1469.71	0	-8.4	412	Non	240.4	123.15	123.15	6.97	11	>sp|Q9DCV7|K2C7_MOUSE Keratin, type II cytoskeletal 7 OS=Mus musculus OX=10090 GN=Krt7 PE=1 SV=1	41671	controllerType=0 controllerNumber=1 scan=13774	67.7952
09560:2	7	G.SNALSFSGGPGALRA.Y			702.861	2	1404.71	1404.72	0	-6.4	428	Non	207.75	61.2	61.2	5.12	11	>sp|Q9DCV7|K2C7_MOUSE Keratin, type II cytoskeletal 7 OS=Mus musculus OX=10090 GN=Krt7 PE=1 SV=1	41671	controllerType=0 controllerNumber=1 scan=18261	83.1349
07562:2	7	N.STGGNGGKLIFG.G			554.29	2	1107.57	1107.58	0	-6.3	412	Non	261.97	19.7	19.7	3.63	11	>sp|Q9DCV7|K2C7_MOUSE Keratin, type II cytoskeletal 7 OS=Mus musculus OX=10090 GN=Krt7 PE=1 SV=1	41671	controllerType=0 controllerNumber=1 scan=14701	69.9559
04756:3	7	F.SGGPGALRAYSIKTT.S			493.601	3	1478.79	1478.8	0	-6	434	Non	112.34	32.79	32.79	2.19	11	>sp|Q9DCV7|K2C7_MOUSE Keratin, type II cytoskeletal 7 OS=Mus musculus OX=10090 GN=Krt7 PE=1 SV=1	41671	controllerType=0 controllerNumber=1 scan=11047	61.3364
04816:2	7	L.SFSGGPGALRA.Y			510.264	2	1019.52	1019.53	0	-5	432	Non	228.56	31.37	31.37	2.16	11	>sp|Q9DCV7|K2C7_MOUSE Keratin, type II cytoskeletal 7 OS=Mus musculus OX=10090 GN=Krt7 PE=1 SV=1	41671	controllerType=0 controllerNumber=1 scan=11134	61.5608
05664:2	7	R.SLYGLGSSRPRVA.V			681.875	2	1362.74	1362.75	0	-4.1	32	CRagged	134.33	20.62	20.62	1.53	11	>sp|Q9DCV7|K2C7_MOUSE Keratin, type II cytoskeletal 7 OS=Mus musculus OX=10090 GN=Krt7 PE=1 SV=1	41671	controllerType=0 controllerNumber=1 scan=12228	64.0593
09334:2	145	E.SYVDIHTGL.S			502.753	2	1004.5	1004.5	0	-5.3	168	Non	463.46	196.08	196.08	7.96	2	>sp|Q9DCC4|P5CR3_MOUSE Pyrroline-5-carboxylate reductase 3 OS=Mus musculus OX=10090 GN=Pycr3 PE=1 SV=2	51407	controllerType=0 controllerNumber=1 scan=17430	78.4571
13241:2	145	A.TKPQVLPTVLAE.V			648.377	2	1295.75	1295.76	0	-7.9	76	Non	144.86	3.63	3.63	2.01	2	>sp|Q9DCC4|P5CR3_MOUSE Pyrroline-5-carboxylate reductase 3 OS=Mus musculus OX=10090 GN=Pycr3 PE=1 SV=2	51407	controllerType=0 controllerNumber=1 scan=24399	105.719
04739:2	303	L.DYIKGGTQI.N			497.76	2	994.514	994.52	0	-6.7	313	Non	320.8	61.17	61.17	4.53	1	>sp|Q9DC53|CPNE8_MOUSE Copine-8 OS=Mus musculus OX=10090 GN=Cpne8 PE=2 SV=3	50547	controllerType=0 controllerNumber=1 scan=11026	61.2876
11449:2	200	S.YYLNDLDRI.S			592.797	2	1184.59	1184.59	0	-5.9	154	Non	358.76	91	91	7.37	1	>sp|Q9DC51|GNAI3_MOUSE Guanine nucleotide-binding protein G(k) subunit alpha OS=Mus musculus OX=10090 GN=Gnai3 PE=1 SV=3	42328	controllerType=0 controllerNumber=1 scan=21239	93.0612
05394:2	60	I.EYIHSKNFI.H			575.794	2	1150.58	1150.59	0	-6.4	117	Non	392.38	102.54	102.54	7.47	3	>sp|Q9DC28|KC1D_MOUSE Casein kinase I isoform delta OS=Mus musculus OX=10090 GN=Csnk1d PE=1 SV=2	41613	controllerType=0 controllerNumber=1 scan=11874	63.2264
04659:2	60	H.RGAPVNVSSSDLTG.R			680.343	2	1359.68	1359.69	0	-5.2	375	Non	245.33	80.13	80.13	6.93	3	>sp|Q9DC28|KC1D_MOUSE Casein kinase I isoform delta OS=Mus musculus OX=10090 GN=Csnk1d PE=1 SV=2	41613	controllerType=0 controllerNumber=1 scan=10925	61.0561
05269:2	88	Y.TNTALPPANYQGNN.Y			737.846	2	1474.69	1474.69	0	-4.7	832	Non	240.23	42.68	42.68	6.39	3	>sp|Q9DBR1|XRN2_MOUSE 5'-3' exoribonuclease 2 OS=Mus musculus OX=10090 GN=Xrn2 PE=1 SV=1	44609	controllerType=0 controllerNumber=1 scan=11715	62.8807
04634:2	88	N.TALPPANYQGNN.Y			630.301	2	1259.6	1259.6	0	-4.8	834	Non	238.38	48.98	48.98	4.72	3	>sp|Q9DBR1|XRN2_MOUSE 5'-3' exoribonuclease 2 OS=Mus musculus OX=10090 GN=Xrn2 PE=1 SV=1	44609	controllerType=0 controllerNumber=1 scan=10892	60.9785
04882:2	88	T.NTALPPANYQGNN.Y			687.322	2	1373.64	1373.64	0	-5.9	833	Non	202	45.41	45.41	3.52	3	>sp|Q9DBR1|XRN2_MOUSE 5'-3' exoribonuclease 2 OS=Mus musculus OX=10090 GN=Xrn2 PE=1 SV=1	44609	controllerType=0 controllerNumber=1 scan=11222	61.7664
07262:2	439	D.TPENNPDTPFD.F			623.762	2	1246.52	1246.52	0	-3.8	43	Non	265.33	93.95	93.95	2.18	2	>sp|Q9D6J6|NDUV2_MOUSE NADH dehydrogenase [ubiquinone] flavoprotein 2, mitochondrial OS=Mus musculus OX=10090 GN=Ndufv2 PE=1 SV=2	49788	controllerType=0 controllerNumber=1 scan=14308	69.0404
09519:2	430	A.AFQNVLTHV.C			514.778	2	1028.55	1028.55	0	-4.1	350	Non	330.15	59.17	59.17	2.38	1	>sp|Q9D5T0|ATAD1_MOUSE ATPase family AAA domain-containing protein 1 OS=Mus musculus OX=10090 GN=Atad1 PE=1 SV=1	53225	controllerType=0 controllerNumber=1 scan=18192	82.9091
10462:2	469	N.SYLEDKVYL.A			565.288	2	1129.57	1129.58	0	-7.6	100	Non	287.07	42.57	42.57	1.65	1	>sp|Q9D1M4|MCA3_MOUSE Eukaryotic translation elongation factor 1 epsilon-1 OS=Mus musculus OX=10090 GN=Eef1e1 PE=1 SV=1	47249	controllerType=0 controllerNumber=1 scan=19607	87.1774
05276:2	91	G.HALLPGEGAAM[+15.995]AE.Y		M[+16]	641.805	2	1282.6	1282.61	0	-5.7	311	Non	402.19	131.5	131.5	9.12	1	>sp|Q9D0F4|NKAP_MOUSE NF-kappa-B-activating protein OS=Mus musculus OX=10090 GN=Nkap PE=2 SV=1	49968	controllerType=0 controllerNumber=1 scan=11723	62.8957
07717:2	134	S.HSGNVTPTAPPYLQ.E			741.369	2	1481.73	1481.74	0	-5.3	17	Non	297.98	156.62	156.62	8.4	1	>sp|Q9CZX7|PP4P2_MOUSE Type 2 phosphatidylinositol 4,5-bisphosphate 4-phosphatase OS=Mus musculus OX=10090 GN=Pip4p2 PE=1 SV=1	51511	controllerType=0 controllerNumber=1 scan=14904	70.4343
09383:2	63	C.GYIESIQHI.L			530.275	2	1059.54	1059.55	0	-4.7	201	Non	435	159.19	159.19	8.05	2	>sp|Q9CXC3|MGME1_MOUSE Mitochondrial genome maintenance exonuclease 1 OS=Mus musculus OX=10090 GN=Mgme1 PE=2 SV=1	41742	controllerType=0 controllerNumber=1 scan=17795	80.8848
07585:2	63	G.YIESIQHI.L			501.764	2	1002.52	1002.53	0	-5.8	202	Non	273.57	73.77	73.77	5.65	2	>sp|Q9CXC3|MGME1_MOUSE Mitochondrial genome maintenance exonuclease 1 OS=Mus musculus OX=10090 GN=Mgme1 PE=2 SV=1	41742	controllerType=0 controllerNumber=1 scan=14727	70.0013
12530:2	35	G.SDYGNGFGGFGSY.S			664.26	2	1327.51	1327.52	0	-6.9	249	Non	540.57	365.24	365.24	10.27	3	>sp|Q9CX86|ROA0_MOUSE Heterogeneous nuclear ribonucleoprotein A0 OS=Mus musculus OX=10090 GN=Hnrnpa0 PE=1 SV=1	48985	controllerType=0 controllerNumber=1 scan=23262	101.908
10843:2	35	G.SDYGNGFGGFGS.Y			582.731	2	1164.45	1164.46	0	-4.8	249	Non	284.22	93.01	93.01	7.16	3	>sp|Q9CX86|ROA0_MOUSE Heterogeneous nuclear ribonucleoprotein A0 OS=Mus musculus OX=10090 GN=Hnrnpa0 PE=1 SV=1	48985	controllerType=0 controllerNumber=1 scan=20185	89.0412
11815:2	35	G.SDYGNGFGGF.G			510.704	2	1020.4	1020.41	0	-5.2	249	Non	174.17	21.93	21.93	1.9	3	>sp|Q9CX86|ROA0_MOUSE Heterogeneous nuclear ribonucleoprotein A0 OS=Mus musculus OX=10090 GN=Hnrnpa0 PE=1 SV=1	48985	controllerType=0 controllerNumber=1 scan=21902	95.8081
11743:2	4	Y.SGSPTSYFTSGLQ.A			666.306	2	1331.6	1331.61	0	-5.1	650	Non	407.35	221.3	221.3	9.44	14	>sp|Q9CW46|RAVR1_MOUSE Ribonucleoprotein PTB-binding 1 OS=Mus musculus OX=10090 GN=Raver1 PE=1 SV=2	36727	controllerType=0 controllerNumber=1 scan=21787	95.3872
07466:2	4	S.HLLPSPEPSPEG.S			630.314	2	1259.62	1259.63	0	-5.2	712	Non	450.17	165.03	165.03	9.09	14	>sp|Q9CW46|RAVR1_MOUSE Ribonucleoprotein PTB-binding 1 OS=Mus musculus OX=10090 GN=Raver1 PE=1 SV=2	36727	controllerType=0 controllerNumber=1 scan=14577	69.6666
07524:2	4	A.SNRLPPEPGLPDS.Y			689.848	2	1378.69	1378.7	0	-5.9	580	Non	287.62	151.42	151.42	8.5	14	>sp|Q9CW46|RAVR1_MOUSE Ribonucleoprotein PTB-binding 1 OS=Mus musculus OX=10090 GN=Raver1 PE=1 SV=2	36727	controllerType=0 controllerNumber=1 scan=14650	69.8308
09793:2	4	D.SYGFDYPTDVGPR.R			737.332	2	1473.66	1473.66	0	-4.6	592	NRagged	402.34	217.55	217.55	8.46	14	>sp|Q9CW46|RAVR1_MOUSE Ribonucleoprotein PTB-binding 1 OS=Mus musculus OX=10090 GN=Raver1 PE=1 SV=2	36727	controllerType=0 controllerNumber=1 scan=18622	84.2368
10311:2	4	S.HFYSGSPTSYFT.S			697.303	2	1393.6	1393.61	0	-4.8	647	Non	319.22	127.8	127.8	7.98	14	>sp|Q9CW46|RAVR1_MOUSE Ribonucleoprotein PTB-binding 1 OS=Mus musculus OX=10090 GN=Raver1 PE=1 SV=2	36727	controllerType=0 controllerNumber=1 scan=19381	86.479
10551:2	4	S.HFYSGSPTSYF.T			646.779	2	1292.55	1292.56	0	-5.6	647	Non	320.07	139.12	139.12	7.77	14	>sp|Q9CW46|RAVR1_MOUSE Ribonucleoprotein PTB-binding 1 OS=Mus musculus OX=10090 GN=Raver1 PE=1 SV=2	36727	controllerType=0 controllerNumber=1 scan=19733	87.5467
07515:2	4	S.HLLPSPEPSPE.G			601.803	2	1202.6	1202.61	0	-5	712	Non	330.92	127.27	127.27	7.72	14	>sp|Q9CW46|RAVR1_MOUSE Ribonucleoprotein PTB-binding 1 OS=Mus musculus OX=10090 GN=Raver1 PE=1 SV=2	36727	controllerType=0 controllerNumber=1 scan=14638	69.8004
04605:2	4	P.SPEPSPEGSYVGQ.H			667.294	2	1333.58	1333.59	0	-7.1	716	Non	311.83	169.1	169.1	7.68	14	>sp|Q9CW46|RAVR1_MOUSE Ribonucleoprotein PTB-binding 1 OS=Mus musculus OX=10090 GN=Raver1 PE=1 SV=2	36727	controllerType=0 controllerNumber=1 scan=10856	60.8979
07233:2	4	K.SRLLSPIASN.R			529.301	2	1057.6	1057.6	0	-4.4	572	CRagged	354.76	88.34	88.34	6.72	14	>sp|Q9CW46|RAVR1_MOUSE Ribonucleoprotein PTB-binding 1 OS=Mus musculus OX=10090 GN=Raver1 PE=1 SV=2	36727	controllerType=0 controllerNumber=1 scan=14268	68.9456
04414:2	4	S.HFYSGSPTSY.F			573.245	2	1145.48	1145.49	0	-6.9	647	Non	332.37	118.46	118.46	6.53	14	>sp|Q9CW46|RAVR1_MOUSE Ribonucleoprotein PTB-binding 1 OS=Mus musculus OX=10090 GN=Raver1 PE=1 SV=2	36727	controllerType=0 controllerNumber=1 scan=10625	60.3952
09603:2	4	S.YGFDYPTDVGPR.R			693.815	2	1386.62	1386.63	0	-6.8	593	NRagged	238.8	80.56	80.56	5.76	14	>sp|Q9CW46|RAVR1_MOUSE Ribonucleoprotein PTB-binding 1 OS=Mus musculus OX=10090 GN=Raver1 PE=1 SV=2	36727	controllerType=0 controllerNumber=1 scan=18327	83.3289
12149:2	4	L.SGPALSTALLQ.L			529.295	2	1057.58	1057.59	0	-5.8	372	Non	309.04	50.72	50.72	5.23	14	>sp|Q9CW46|RAVR1_MOUSE Ribonucleoprotein PTB-binding 1 OS=Mus musculus OX=10090 GN=Raver1 PE=1 SV=2	36727	controllerType=0 controllerNumber=1 scan=22521	98.5504
10061:2	4	S.HFYSGSPTSYFTS.G			740.819	2	1480.63	1480.64	0	-5.4	647	Non	193.19	51.58	51.58	3.07	14	>sp|Q9CW46|RAVR1_MOUSE Ribonucleoprotein PTB-binding 1 OS=Mus musculus OX=10090 GN=Raver1 PE=1 SV=2	36727	controllerType=0 controllerNumber=1 scan=19017	85.4033
12202:2	4	Y.SGSPTSYFTSGLQA.G			701.823	2	1402.64	1402.65	0	-7.1	650	Non	137.98	15.8	15.8	2.26	14	>sp|Q9CW46|RAVR1_MOUSE Ribonucleoprotein PTB-binding 1 OS=Mus musculus OX=10090 GN=Raver1 PE=1 SV=2	36727	controllerType=0 controllerNumber=1 scan=22611	98.9051
07865:2	123	Y.VYIPSKTDL.G			518.287	2	1035.57	1035.57	0	-5.5	106	Non	357.3	54.49	54.49	4.98	3	>sp|Q9CRB2|NHP2_MOUSE H/ACA ribonucleoprotein complex subunit 2 OS=Mus musculus OX=10090 GN=Nhp2 PE=1 SV=1	49917	controllerType=0 controllerNumber=1 scan=15094	70.8446
08365:2	123	Y.VYIPSKTDLGAATGS.K			740.384	2	1479.76	1479.77	0	-5.3	106	Non	225.04	38.68	38.68	4.64	3	>sp|Q9CRB2|NHP2_MOUSE H/ACA ribonucleoprotein complex subunit 2 OS=Mus musculus OX=10090 GN=Nhp2 PE=1 SV=1	49917	controllerType=0 controllerNumber=1 scan=15739	72.3288
11903:2	123	R.TYKELLVNL.N			546.815	2	1092.62	1092.63	0	-6.5	23	CRagged	199.72	6.41	6.41	1.91	3	>sp|Q9CRB2|NHP2_MOUSE H/ACA ribonucleoprotein complex subunit 2 OS=Mus musculus OX=10090 GN=Nhp2 PE=1 SV=1	49917	controllerType=0 controllerNumber=1 scan=22060	96.485
11878:2	74	A.TVGLNVPASVRF.S			630.354	2	1259.7	1259.71	0	-7.4	67	Non	476.7	211.2	211.2	9.19	2	>sp|Q9CR68|UCRI_MOUSE Cytochrome b-c1 complex subunit Rieske, mitochondrial OS=Mus musculus OX=10090 GN=Uqcrfs1 PE=1 SV=1	43679	controllerType=0 controllerNumber=1 scan=22007	96.2145
10875:2	74	H.TDVKVPDFSDY.R			643.298	2	1285.59	1285.59	0	-4.2	81	Non	246.92	72.87	72.87	4.08	2	>sp|Q9CR68|UCRI_MOUSE Cytochrome b-c1 complex subunit Rieske, mitochondrial OS=Mus musculus OX=10090 GN=Uqcrfs1 PE=1 SV=1	43679	controllerType=0 controllerNumber=1 scan=20243	89.2632
04788:2	325	A.SYSQSKQFL.L			544.272	2	1087.54	1087.54	0	-4.3	201	Non	287.61	68.52	68.52	4.18	1	>sp|Q9CR62|M2OM_MOUSE Mitochondrial 2-oxoglutarate/malate carrier protein OS=Mus musculus OX=10090 GN=Slc25a11 PE=1 SV=3	47312	controllerType=0 controllerNumber=1 scan=11095	61.4682
07439:2	77	K.TKDIKEGIPLPT.K			656.376	2	1311.74	1311.75	0	-5.3	57	CRagged	457.05	245.77	245.77	7.18	2	>sp|Q9CQF0|RM11_MOUSE 39S ribosomal protein L11, mitochondrial OS=Mus musculus OX=10090 GN=Mrpl11 PE=1 SV=1	48793	controllerType=0 controllerNumber=1 scan=14537	69.5513
03538:3	77	K.TKDIKEGIPLPTK.I			480.618	3	1439.84	1439.85	0	-5.5	57	Specific	322.37	219.89	219.89	5.59	2	>sp|Q9CQF0|RM11_MOUSE 39S ribosomal protein L11, mitochondrial OS=Mus musculus OX=10090 GN=Mrpl11 PE=1 SV=1	48793	controllerType=0 controllerNumber=1 scan=9513	57.745
05428:2	335	A.VYQAIHEGI.Q			515.269	2	1029.53	1029.54	0	-4.6	654	Non	277.89	71.44	71.44	3.99	1	>sp|Q99PU5|ACBG1_MOUSE Long-chain-fatty-acid--CoA ligase ACSBG1 OS=Mus musculus OX=10090 GN=Acsbg1 PE=1 SV=1	52299	controllerType=0 controllerNumber=1 scan=11925	63.3687
09376:2	107	R.IYKGVIQAI.Q			502.808	2	1004.61	1004.61	0	-4.1	1026	CRagged	365.73	152.35	152.35	6.05	3	>sp|Q99P72|RTN4_MOUSE Reticulon-4 OS=Mus musculus OX=10090 GN=Rtn4 PE=1 SV=2	49084	controllerType=0 controllerNumber=1 scan=17767	80.7189
06744:2	107	S.SSADSPPRPPPAF.K			663.326	2	1325.64	1325.65	0	-3.2	12	Non	284.8	56.32	56.32	5.52	3	>sp|Q99P72|RTN4_MOUSE Reticulon-4 OS=Mus musculus OX=10090 GN=Rtn4 PE=1 SV=2	49084	controllerType=0 controllerNumber=1 scan=13649	67.531
11594:2	324	M.FYLETQQQI.S			585.29	2	1169.57	1169.58	0	-9.7	537	Non	364.95	59.86	59.86	4.19	2	>sp|Q99MP8|BRAP_MOUSE BRCA1-associated protein OS=Mus musculus OX=10090 GN=Brap PE=1 SV=1	40874	controllerType=0 controllerNumber=1 scan=21485	94.0207
07932:2	419	T.SYQSQINQI.R			540.766	2	1080.53	1080.53	0	-6.2	245	Non	279.6	56.68	56.68	2.5	1	>sp|Q99MJ9|DDX50_MOUSE ATP-dependent RNA helicase DDX50 OS=Mus musculus OX=10090 GN=Ddx50 PE=2 SV=1	39043	controllerType=0 controllerNumber=1 scan=15176	71.0216
09417:2	234	M.SYLESKGLL.A			505.279	2	1009.55	1009.56	0	-4.9	216	Non	352.75	67.64	67.64	5.52	1	>sp|Q99ME2|WDR6_MOUSE WD repeat-containing protein 6 OS=Mus musculus OX=10090 GN=Wdr6 PE=1 SV=1	44692	controllerType=0 controllerNumber=1 scan=17958	81.87
09374:2	378	I.SFHPSGDFI.L			503.733	2	1006.46	1006.46	0	-5.2	224	Non	350.77	46.68	46.68	3.12	1	>sp|Q99LC2|CSTF1_MOUSE Cleavage stimulation factor subunit 1 OS=Mus musculus OX=10090 GN=Cstf1 PE=1 SV=1	39983	controllerType=0 controllerNumber=1 scan=17751	80.6118
04653:2	462	K.SNNRTSQFGNFE.F			700.809	2	1400.61	1400.62	0	-5.6	73	CRagged	179.13	75.9	75.9	1.73	1	>sp|Q99JP4|CDC26_MOUSE Anaphase-promoting complex subunit CDC26 OS=Mus musculus OX=10090 GN=Cdc26 PE=1 SV=1	40109	controllerType=0 controllerNumber=1 scan=10917	61.0363
06996:2	341	T.SYLPQDPSRTV.P			631.818	2	1262.63	1262.64	0	-7.7	205	Non	281.61	52.09	52.09	3.83	1	>sp|Q925B0|PAWR_MOUSE PRKC apoptosis WT1 regulator protein OS=Mus musculus OX=10090 GN=Pawr PE=1 SV=2	50880	controllerType=0 controllerNumber=1 scan=13956	68.1899
10784:2	331	M.AYLESQNYI.H			550.763	2	1100.52	1100.53	0	-6.9	350	Non	272.32	76.34	76.34	4.12	1	>sp|Q922K9|FRK_MOUSE Tyrosine-protein kinase FRK OS=Mus musculus OX=10090 GN=Frk PE=1 SV=3	45910	controllerType=0 controllerNumber=1 scan=20091	88.7333
08902:2	348	A.SPQLPVQIQAAGKSG.F			740.906	2	1480.8	1480.81	0	-4.8	288	Non	177.24	77.77	77.77	4.42	1	>sp|Q921N8|GPS2_MOUSE G protein pathway suppressor 2 OS=Mus musculus OX=10090 GN=Gps2 PE=1 SV=1	42551	controllerType=0 controllerNumber=1 scan=16451	74.0344
10324:2	180	N.SYSGSNSGAPLGWGS.A			713.812	2	1426.62	1426.62	0	-5.4	373	Non	247.95	96.43	96.43	7.51	2	>sp|Q921F2|TADBP_MOUSE TAR DNA-binding protein 43 OS=Mus musculus OX=10090 GN=Tardbp PE=1 SV=1	38599	controllerType=0 controllerNumber=1 scan=19401	86.5413
10821:2	180	N.SYSGSNSGAPLGWGSA.S			749.331	2	1497.66	1497.66	0	-3.3	373	Non	116.36	11.42	11.42	1.6	2	>sp|Q921F2|TADBP_MOUSE TAR DNA-binding protein 43 OS=Mus musculus OX=10090 GN=Tardbp PE=1 SV=1	38599	controllerType=0 controllerNumber=1 scan=20151	88.9402
09221:2	420	L.SYLPTAERL.T			525.282	2	1049.56	1049.56	0	-5.7	292	Non	317.85	26.46	26.46	2.5	1	>sp|Q920N7|SYT12_MOUSE Synaptotagmin-12 OS=Mus musculus OX=10090 GN=Syt12 PE=1 SV=1	37550	controllerType=0 controllerNumber=1 scan=16894	75.1633
05867:2	27	K.TATSSPASTPLSPM[+15.995].R		M[+16]	682.32	2	1363.63	1363.64	0	-6	694	CRagged	473.06	308.01	308.01	8.99	3	>sp|Q91YK2|RRP1B_MOUSE Ribosomal RNA processing protein 1 homolog B OS=Mus musculus OX=10090 GN=Rrp1b PE=1 SV=2	49030	controllerType=0 controllerNumber=1 scan=12470	64.5676
09294:2	27	V.SPTGLSRVAFNPE.Q			687.851	2	1374.69	1374.7	0	-4.9	672	Non	251.61	78.46	78.46	7.36	3	>sp|Q91YK2|RRP1B_MOUSE Ribosomal RNA processing protein 1 homolog B OS=Mus musculus OX=10090 GN=Rrp1b PE=1 SV=2	49030	controllerType=0 controllerNumber=1 scan=17001	75.4585
05291:2	27	A.TSSPASTPLSPM[+15.995].R		M[+16]	596.279	2	1191.55	1191.56	0	-5	696	Non	218.86	51.11	51.11	3.06	3	>sp|Q91YK2|RRP1B_MOUSE Ribosomal RNA processing protein 1 homolog B OS=Mus musculus OX=10090 GN=Rrp1b PE=1 SV=2	49030	controllerType=0 controllerNumber=1 scan=11742	62.9351
09257:2	304	Q.TYSPSRVLI.T			518.292	2	1035.58	1035.58	0	-6.3	463	Non	311.03	43.77	43.77	4.53	1	>sp|Q91XU0|WRIP1_MOUSE ATPase WRNIP1 OS=Mus musculus OX=10090 GN=Wrnip1 PE=1 SV=2	44527	controllerType=0 controllerNumber=1 scan=16943	75.2815
10714:2	255	K.NYQEALRYI.G			585.297	2	1169.59	1169.59	0	-6.8	525	CRagged	338.61	84.22	84.22	5.22	1	>sp|Q91W86|VPS11_MOUSE Vacuolar protein sorting-associated protein 11 homolog OS=Mus musculus OX=10090 GN=Vps11 PE=1 SV=3	44553	controllerType=0 controllerNumber=1 scan=19980	88.3273
09429:2	61	S.STGINFDNPSVQ.K			639.799	2	1278.59	1278.6	0	-4.6	530	Non	372.28	166.72	166.72	9.17	2	>sp|Q91W39|NCOA5_MOUSE Nuclear receptor coactivator 5 OS=Mus musculus OX=10090 GN=Ncoa5 PE=1 SV=1	47492	controllerType=0 controllerNumber=1 scan=17996	82.0698
09586:2	61	S.TGINFDNPSVQ.K			596.283	2	1191.56	1191.56	0	-5	531	Non	265.18	45.3	45.3	4.45	2	>sp|Q91W39|NCOA5_MOUSE Nuclear receptor coactivator 5 OS=Mus musculus OX=10090 GN=Ncoa5 PE=1 SV=1	47492	controllerType=0 controllerNumber=1 scan=18302	83.2556
06717:2	183	Q.KYDPINSM[+15.995]L.T		M[+16]	548.768	2	1096.53	1096.53	0	-5.2	313	Non	344.65	141.38	141.38	6.97	1	>sp|Q91VC9|GHITM_MOUSE Growth hormone-inducible transmembrane protein OS=Mus musculus OX=10090 GN=Ghitm PE=1 SV=1	45292	controllerType=0 controllerNumber=1 scan=13612	67.4383
08209:2	199	C.GYNSVQHLI.N			515.766	2	1030.53	1030.53	0	-6	682	Non	343.63	104.46	104.46	7.4	1	>sp|Q91V83|TTI1_MOUSE TELO2-interacting protein 1 homolog OS=Mus musculus OX=10090 GN=Tti1 PE=1 SV=2	43615	controllerType=0 controllerNumber=1 scan=15541	71.886
09745:2	417	G.KYNILGTNTI.M			568.816	2	1136.63	1136.63	0	-4.8	500	Non	251.28	36.94	36.94	2.54	2	>sp|Q8VEK3|HNRPU_MOUSE Heterogeneous nuclear ribonucleoprotein U OS=Mus musculus OX=10090 GN=Hnrnpu PE=1 SV=1	42739	controllerType=0 controllerNumber=1 scan=18547	84.006
08649:2	33	L.SVTSRPGISTFGYN.K			743.367	2	1485.73	1485.73	0	-4.4	4	Non	257.53	78.38	78.38	7.41	4	>sp|Q8VC70|RBMS2_MOUSE RNA-binding motif, single-stranded-interacting protein 2 OS=Mus musculus OX=10090 GN=Rbms2 PE=1 SV=1	36658	controllerType=0 controllerNumber=1 scan=16109	73.1887
01055:2	33	T.SGASRGVGF.A			419.212	2	837.416	837.421	0	-6.4	173	Non	295.11	108.68	108.68	6.53	4	>sp|Q8VC70|RBMS2_MOUSE RNA-binding motif, single-stranded-interacting protein 2 OS=Mus musculus OX=10090 GN=Rbms2 PE=1 SV=1	36658	controllerType=0 controllerNumber=1 scan=6112	48.3092
07067:2	33	T.SRPGISTFGYN.K			599.794	2	1198.58	1198.59	0	-3.7	7	Non	278.36	109.61	109.61	5.96	4	>sp|Q8VC70|RBMS2_MOUSE RNA-binding motif, single-stranded-interacting protein 2 OS=Mus musculus OX=10090 GN=Rbms2 PE=1 SV=1	36658	controllerType=0 controllerNumber=1 scan=14043	68.3828
06448:2	33	L.SVTSRPGISTFG.Y			604.814	2	1208.62	1208.63	0	-4.7	4	Non	209.61	34.56	34.56	3.18	4	>sp|Q8VC70|RBMS2_MOUSE RNA-binding motif, single-stranded-interacting protein 2 OS=Mus musculus OX=10090 GN=Rbms2 PE=1 SV=1	36658	controllerType=0 controllerNumber=1 scan=13198	66.1768
11154:2	449	K.PVKGSLSLTFLPL.S			686.412	2	1371.82	1371.82	0	-5.6	258	CRagged	173.15	67.89	67.89	1.92	1	>sp|Q8R422|CD109_MOUSE CD109 antigen OS=Mus musculus OX=10090 GN=Cd109 PE=1 SV=1	39285	controllerType=0 controllerNumber=1 scan=20721	91.0274
06378:2	228	N.SLATQEGEWKALK.R			730.888	2	1460.77	1460.77	0	-4.2	842	NRagged	400.18	181.63	181.63	5.63	1	>sp|Q8R3N1|NOP14_MOUSE Nucleolar protein 14 OS=Mus musculus OX=10090 GN=Nop14 PE=1 SV=2	49754	controllerType=0 controllerNumber=1 scan=13109	65.9784
12444:2	101	G.TVASSTPSVGLNF.G			640.327	2	1279.65	1279.65	0	-5	32	Non	365.35	137.03	137.03	8.87	3	>sp|Q8R332|NUP58_MOUSE Nucleoporin p58/p45 OS=Mus musculus OX=10090 GN=Nup58 PE=1 SV=1	51319	controllerType=0 controllerNumber=1 scan=23105	101.266
12978:2	101	A.SSTPSVGLNFGSLG.S			661.828	2	1322.65	1322.66	0	-7.3	35	Non	226.9	0.62	0.62	2.26	3	>sp|Q8R332|NUP58_MOUSE Nucleoporin p58/p45 OS=Mus musculus OX=10090 GN=Nup58 PE=1 SV=1	51319	controllerType=0 controllerNumber=1 scan=24069	105.085
11876:2	101	T.TVAPGGTGAGSGFSF.G			656.808	2	1312.61	1312.62	0	-6.2	16	Non	156.8	7.62	7.62	2.15	3	>sp|Q8R332|NUP58_MOUSE Nucleoporin p58/p45 OS=Mus musculus OX=10090 GN=Nup58 PE=1 SV=1	51319	controllerType=0 controllerNumber=1 scan=22003	96.2002
09462:2	315	K.EYQETIGQI.E			540.762	2	1080.52	1080.52	0	-3.9	425	CRagged	360.44	74.74	74.74	4.34	2	>sp|Q8R2V2|IFFO2_MOUSE Intermediate filament family orphan 2 OS=Mus musculus OX=10090 GN=Iffo2 PE=2 SV=2	43284	controllerType=0 controllerNumber=1 scan=18077	82.4479
03808:2	131	V.TAAPPSGVPSSIR.-			620.335	2	1239.66	1239.67	0	-5.3	167	NRagged	366.84	137.63	137.63	8.48	1	>sp|Q8R2U6|NUDT4_MOUSE Diphosphoinositol polyphosphate phosphohydrolase 2 OS=Mus musculus OX=10090 GN=Nudt4 PE=1 SV=1	51792	controllerType=0 controllerNumber=1 scan=9858	58.5842
10135:2	52	T.SSSIDPGLNIKQLG.G			714.885	2	1428.76	1428.77	0	-5	563	Non	269.19	80.35	80.35	8.32	3	>sp|Q8R2M2|TDIF2_MOUSE Deoxynucleotidyltransferase terminal-interacting protein 2 OS=Mus musculus OX=10090 GN=Dnttip2 PE=1 SV=1	38889	controllerType=0 controllerNumber=1 scan=19121	85.6958
06986:2	52	T.SSSIDPGLNIK.Q			565.802	2	1130.6	1130.61	0	-8.1	563	NRagged	335.04	74.86	74.86	6.48	3	>sp|Q8R2M2|TDIF2_MOUSE Deoxynucleotidyltransferase terminal-interacting protein 2 OS=Mus musculus OX=10090 GN=Dnttip2 PE=1 SV=1	38889	controllerType=0 controllerNumber=1 scan=13944	68.1636
08301:2	52	R.TTGPAEIIV.L			450.753	2	900.499	900.504	0	-5.3	60	CRagged	191.41	3.75	3.75	1.53	3	>sp|Q8R2M2|TDIF2_MOUSE Deoxynucleotidyltransferase terminal-interacting protein 2 OS=Mus musculus OX=10090 GN=Dnttip2 PE=1 SV=1	38889	controllerType=0 controllerNumber=1 scan=15659	72.1511
09485:2	46	D.IYENSWTKL.T			577.294	2	1153.58	1153.59	0	-6.2	94	Non	369.33	72.99	72.99	7.91	3	>sp|Q8QZY1|EIF3L_MOUSE Eukaryotic translation initiation factor 3 subunit L OS=Mus musculus OX=10090 GN=Eif3l PE=1 SV=1	46205	controllerType=0 controllerNumber=1 scan=18132	82.6982
05767:2	46	S.GGPSLEQRF.E			495.75	2	990.492	990.5	0	-8.7	146	Non	351.16	67.35	67.35	6.97	3	>sp|Q8QZY1|EIF3L_MOUSE Eukaryotic translation initiation factor 3 subunit L OS=Mus musculus OX=10090 GN=Eif3l PE=1 SV=1	46205	controllerType=0 controllerNumber=1 scan=12346	64.2945
06139:2	46	D.YYQAIKV.L			442.745	2	884.483	884.488	0	-5.1	287	Non	313.79	29.08	29.08	3.37	3	>sp|Q8QZY1|EIF3L_MOUSE Eukaryotic translation initiation factor 3 subunit L OS=Mus musculus OX=10090 GN=Eif3l PE=1 SV=1	46205	controllerType=0 controllerNumber=1 scan=12817	65.3543
09849:2	202	S.SPGPSRIADYL.L			588.303	2	1175.6	1175.61	0	-5.7	85	Non	311.28	76.56	76.56	7.21	2	>sp|Q8K4K4|TRIB1_MOUSE Tribbles homolog 1 OS=Mus musculus OX=10090 GN=Trib1 PE=2 SV=2	44284	controllerType=0 controllerNumber=1 scan=18712	84.5246
09944:2	202	V.SSPGPSRIADYL.L			631.82	2	1262.63	1262.64	0	-3.7	84	Non	126.38	19.98	19.98	1.9	2	>sp|Q8K4K4|TRIB1_MOUSE Tribbles homolog 1 OS=Mus musculus OX=10090 GN=Trib1 PE=2 SV=2	44284	controllerType=0 controllerNumber=1 scan=18849	84.9225
07298:2	139	G.SAAPSFSIGAGSKTPG.A			717.862	2	1434.72	1434.72	0	-4.1	1170	Non	318.03	144.66	144.66	8.21	1	>sp|Q8K3Z9|PO121_MOUSE Nuclear envelope pore membrane protein POM 121 OS=Mus musculus OX=10090 GN=Pom121 PE=1 SV=2	51507	controllerType=0 controllerNumber=1 scan=14354	69.137
06598:2	347	T.FYEKVQSDL.L			564.78	2	1128.55	1128.56	0	-4.4	331	Non	283.23	39.7	39.7	3.79	1	>sp|Q8K2P7|S38A1_MOUSE Sodium-coupled neutral amino acid transporter 1 OS=Mus musculus OX=10090 GN=Slc38a1 PE=1 SV=1	37901	controllerType=0 controllerNumber=1 scan=13423	66.8568
09284:2	290	D.GYYAM[+15.995]VGQV.H		M[+16]	502.229	2	1003.45	1003.46	0	-5.4	261	Non	298.52	83.56	83.56	4.12	1	>sp|Q8K2C8|GPAT4_MOUSE Glycerol-3-phosphate acyltransferase 4 OS=Mus musculus OX=10090 GN=Gpat4 PE=1 SV=1	42113	controllerType=0 controllerNumber=1 scan=16986	75.4136
08386:2	288	K.SYNSGLSNSEL.Q			585.764	2	1170.52	1170.53	0	-5.8	480	CRagged	292.17	72.04	72.04	4.74	1	>sp|Q8K203|NEIL3_MOUSE Endonuclease 8-like 3 OS=Mus musculus OX=10090 GN=Neil3 PE=1 SV=1	53391	controllerType=0 controllerNumber=1 scan=15768	72.3989
04333:2	441	K.TARPNNPQLL.H			562.311	2	1123.62	1123.62	0	-5.7	428	CRagged	293.4	42.21	42.21	2.17	2	>sp|Q8K1S3|UNC5B_MOUSE Netrin receptor UNC5B OS=Mus musculus OX=10090 GN=Unc5b PE=1 SV=1	43643	controllerType=0 controllerNumber=1 scan=10521	60.1521
09749:2	143	P.SFVAIKAGTTL.H			554.322	2	1107.64	1107.64	0	-4.5	241	Non	323.39	80.02	80.02	8.13	1	>sp|Q8K1A5|TM41B_MOUSE Transmembrane protein 41B OS=Mus musculus OX=10090 GN=Tmem41b PE=1 SV=1	45083	controllerType=0 controllerNumber=1 scan=18555	84.036
07534:2	305	T.TQPAGSGPKPFL.F			600.322	2	1199.64	1199.64	0	-5.1	514	Non	278.68	59.94	59.94	4.5	1	>sp|Q8K0L9|ZBT20_MOUSE Zinc finger and BTB domain-containing protein 20 OS=Mus musculus OX=10090 GN=Zbtb20 PE=1 SV=1	49143	controllerType=0 controllerNumber=1 scan=14663	69.8582
08249:2	68	E.IYSTSKAFI.G			515.282	2	1029.56	1029.56	0	-4.8	115	Non	338.85	96.35	96.35	6.89	3	>sp|Q8JZS6|N42L2_MOUSE NEDD4-binding protein 2-like 2 OS=Mus musculus OX=10090 GN=N4bp2l2 PE=2 SV=2	47539	controllerType=0 controllerNumber=1 scan=15599	72.0376
04154:2	68	G.SHSQVSIADDY.-			611.269	2	1221.53	1221.54	0	-6.8	565	Non	299.99	146.68	146.68	6.78	3	>sp|Q8JZS6|N42L2_MOUSE NEDD4-binding protein 2-like 2 OS=Mus musculus OX=10090 GN=N4bp2l2 PE=2 SV=2	47539	controllerType=0 controllerNumber=1 scan=10300	59.6345
04199:2	68	S.HSQVSIADDY.-			567.753	2	1134.5	1134.51	0	-7.1	566	Non	213.94	31.05	31.05	1.53	3	>sp|Q8JZS6|N42L2_MOUSE NEDD4-binding protein 2-like 2 OS=Mus musculus OX=10090 GN=N4bp2l2 PE=2 SV=2	47539	controllerType=0 controllerNumber=1 scan=10353	59.7589
10005:2	482	D.KFIESIQSI.P			532.8	2	1064.59	1064.6	0	-5.7	325	Non	261.97	45.79	45.79	1.5	1	>sp|Q8CI78|RMND1_MOUSE Required for meiotic nuclear division protein 1 homolog OS=Mus musculus OX=10090 GN=Rmnd1 PE=1 SV=1	48590	controllerType=0 controllerNumber=1 scan=18937	85.1669
07843:2	283	R.SPAAPSPLALR.Q			540.311	2	1079.62	1079.62	0	-4.9	463	Specific	318.89	97.42	97.42	4.8	1	>sp|Q8CI08|SLAI2_MOUSE SLAIN motif-containing protein 2 OS=Mus musculus OX=10090 GN=Slain2 PE=1 SV=2	38251	controllerType=0 controllerNumber=1 scan=15066	70.7883
07797:2	54	Q.TQPQPLLQQPQ.Q			639.343	2	1277.68	1277.68	0	-4.2	260	Non	364.96	103.17	103.17	7.49	4	>sp|Q8CH18|CCAR1_MOUSE Cell division cycle and apoptosis regulator protein 1 OS=Mus musculus OX=10090 GN=Ccar1 PE=1 SV=1	39437	controllerType=0 controllerNumber=1 scan=15005	70.6493
10400:2	54	Q.TAALQQQAAAVLQ.Q			656.862	2	1312.72	1312.72	0	-4.4	66	Non	267.19	19.55	19.55	5.1	4	>sp|Q8CH18|CCAR1_MOUSE Cell division cycle and apoptosis regulator protein 1 OS=Mus musculus OX=10090 GN=Ccar1 PE=1 SV=1	39437	controllerType=0 controllerNumber=1 scan=19519	86.9269
07088:2	54	Q.TQPQPLLQ.Q			462.758	2	924.509	924.515	0	-6.8	260	Non	316.07	79.04	79.04	4.21	4	>sp|Q8CH18|CCAR1_MOUSE Cell division cycle and apoptosis regulator protein 1 OS=Mus musculus OX=10090 GN=Ccar1 PE=1 SV=1	39437	controllerType=0 controllerNumber=1 scan=14071	68.4483
06431:2	416	E.FYRQVSTSL.L			550.788	2	1100.57	1100.57	0	-4.2	1701	Non	310.56	61.99	61.99	2.57	2	>sp|Q8CGN4|BCOR_MOUSE BCL-6 corepressor OS=Mus musculus OX=10090 GN=Bcor PE=1 SV=2	41043	controllerType=0 controllerNumber=1 scan=13175	66.1169
11647:2	237	C.TANVIDTIPEPLR.D			719.895	2	1438.78	1438.79	0	-4.6	627	NRagged	235.93	120.32	120.32	5.47	1	>sp|Q8CGK3|LONM_MOUSE Lon protease homolog, mitochondrial OS=Mus musculus OX=10090 GN=Lonp1 PE=1 SV=2	46898	controllerType=0 controllerNumber=1 scan=21602	94.5786
06541:2	164	S.HYADVDPENQNF.L			724.804	2	1448.6	1448.61	0	-5.1	40	Non	224.69	139.7	139.7	5.48	2	>sp|Q8CFE6|S38A2_MOUSE Sodium-coupled neutral amino acid transporter 2 OS=Mus musculus OX=10090 GN=Slc38a2 PE=1 SV=1	38439	controllerType=0 controllerNumber=1 scan=13309	66.4106
00682:2	164	K.SHYADVDPENQN.F			694.785	2	1388.56	1388.57	0	-5.4	39	CRagged	105.81	105.81	105.81	4.65	2	>sp|Q8CFE6|S38A2_MOUSE Sodium-coupled neutral amino acid transporter 2 OS=Mus musculus OX=10090 GN=Slc38a2 PE=1 SV=1	38439	controllerType=0 controllerNumber=1 scan=5462	45.6388
09005:2	437	A.SYINPDHLK.Y			543.779	2	1086.55	1086.56	0	-5.9	589	NRagged	315.2	41.43	41.43	2.33	2	>sp|Q8C863|ITCH_MOUSE E3 ubiquitin-protein ligase Itchy OS=Mus musculus OX=10090 GN=Itch PE=1 SV=2	42421	controllerType=0 controllerNumber=1 scan=16598	74.4121
06789:2	295	A.TEAKPAPEIFEN.E			673.333	2	1345.66	1345.66	0	-3.9	121	Non	270.62	89.75	89.75	4.64	1	>sp|Q8C6I2|SDHF2_MOUSE Succinate dehydrogenase assembly factor 2, mitochondrial OS=Mus musculus OX=10090 GN=Sdhaf2 PE=1 SV=1	37883	controllerType=0 controllerNumber=1 scan=13703	67.6448
11880:2	171	R.STVPESVTQQILQ.Q			715.375	2	1429.74	1429.75	0	-7	86	CRagged	305.05	128.71	128.71	7.72	1	>sp|Q8C6B9|AROS_MOUSE Active regulator of SIRT1 OS=Mus musculus OX=10090 GN=Rps19bp1 PE=1 SV=1	40734	controllerType=0 controllerNumber=1 scan=22011	96.2336
07614:2	11	A.SPSSQSAAASSLGPYG.G			733.838	2	1466.67	1466.68	0	-4.5	291	Non	383.51	242.07	242.07	9.98	9	>sp|Q8C2Q3|RBM14_MOUSE RNA-binding protein 14 OS=Mus musculus OX=10090 GN=Rbm14 PE=1 SV=1	37365	controllerType=0 controllerNumber=1 scan=14761	70.074
06408:2	11	Q.SAASSLAYGAQAAS.Y			627.799	2	1254.59	1254.6	0	-4.1	388	Non	285.99	84.01	84.01	6.57	9	>sp|Q8C2Q3|RBM14_MOUSE RNA-binding protein 14 OS=Mus musculus OX=10090 GN=Rbm14 PE=1 SV=1	37365	controllerType=0 controllerNumber=1 scan=13146	66.0539
06370:2	11	R.TQSSASLAASYAAQ.Q			678.323	2	1355.64	1355.64	0	-3.6	518	CRagged	277.62	85.3	85.3	6.28	9	>sp|Q8C2Q3|RBM14_MOUSE RNA-binding protein 14 OS=Mus musculus OX=10090 GN=Rbm14 PE=1 SV=1	37365	controllerType=0 controllerNumber=1 scan=13098	65.9546
09223:2	11	P.SVSLGAPYRGQLA.S			659.856	2	1318.7	1318.71	0	-5.5	278	Non	255.68	55.83	55.83	5.73	9	>sp|Q8C2Q3|RBM14_MOUSE RNA-binding protein 14 OS=Mus musculus OX=10090 GN=Rbm14 PE=1 SV=1	37365	controllerType=0 controllerNumber=1 scan=16896	75.1681
01825:2	11	R.TQPM[+15.995]AAQAASY.R		M[+16]	577.758	2	1154.51	1154.51	0	-5.6	263	CRagged	223.74	132.79	132.79	5	9	>sp|Q8C2Q3|RBM14_MOUSE RNA-binding protein 14 OS=Mus musculus OX=10090 GN=Rbm14 PE=1 SV=1	37365	controllerType=0 controllerNumber=1 scan=7263	52.0545
00355:2	11	R.TQPM[+15.995]AAQAASYR.A		M[+16]	655.808	2	1310.61	1310.62	0	-5.4	263	Specific	176.53	82.05	82.05	4.17	9	>sp|Q8C2Q3|RBM14_MOUSE RNA-binding protein 14 OS=Mus musculus OX=10090 GN=Rbm14 PE=1 SV=1	37365	controllerType=0 controllerNumber=1 scan=4681	41.2998
04895:2	11	Q.SAPYAAQQAASYS.S			657.799	2	1314.59	1314.6	0	-4.6	414	Non	161.58	35.3	35.3	3.11	9	>sp|Q8C2Q3|RBM14_MOUSE RNA-binding protein 14 OS=Mus musculus OX=10090 GN=Rbm14 PE=1 SV=1	37365	controllerType=0 controllerNumber=1 scan=11240	61.8141
07418:2	11	A.YRAQPSASLGVGY.R			684.847	2	1368.69	1368.69	0	-3.4	249	Non	185.64	35.39	35.39	2.93	9	>sp|Q8C2Q3|RBM14_MOUSE RNA-binding protein 14 OS=Mus musculus OX=10090 GN=Rbm14 PE=1 SV=1	37365	controllerType=0 controllerNumber=1 scan=14506	69.4654
06233:2	11	Y.SGSYNDYLRA.A			573.262	2	1145.52	1145.52	0	-4.5	649	Non	192.33	7.84	7.84	1.91	9	>sp|Q8C2Q3|RBM14_MOUSE RNA-binding protein 14 OS=Mus musculus OX=10090 GN=Rbm14 PE=1 SV=1	37365	controllerType=0 controllerNumber=1 scan=12925	65.5748
12585:2	240	G.SFNPITGTM[+15.995]L.S		M[+16]	548.768	2	1096.53	1096.53	0	-5.2	140	Non	277.03	74.45	74.45	4.81	1	>sp|Q8C1S0|MED19_MOUSE Mediator of RNA polymerase II transcription subunit 19 OS=Mus musculus OX=10090 GN=Med19 PE=1 SV=1	47727	controllerType=0 controllerNumber=1 scan=23361	102.325
08505:2	504	Q.YYVENGKLI.S			549.791	2	1098.58	1098.58	0	-6.9	115	Non	247.92	32.54	32.54	1.35	1	>sp|Q8C0V9|FRMD6_MOUSE FERM domain-containing protein 6 OS=Mus musculus OX=10090 GN=Frmd6 PE=1 SV=2	49981	controllerType=0 controllerNumber=1 scan=15926	72.7765
10937:2	402	G.RYIQGILNV.N			538.313	2	1075.62	1075.63	0	-5.7	242	Non	248.59	39.22	39.22	2.61	2	>sp|Q8C0S1|DI3L1_MOUSE DIS3-like exonuclease 1 OS=Mus musculus OX=10090 GN=Dis3l PE=1 SV=2	45779	controllerType=0 controllerNumber=1 scan=20348	89.6258
07766:2	406	F.SYHPSGLSL.H			480.74	2	960.474	960.479	0	-5.1	68	Non	319.76	65.36	65.36	2.63	1	>sp|Q8BXQ8|FA53C_MOUSE Protein FAM53C OS=Mus musculus OX=10090 GN=Fam53c PE=1 SV=1	46256	controllerType=0 controllerNumber=1 scan=14962	70.5425
06103:2	10	A.SRIPAASAAAM[+15.995]NLA.S		M[+16]	680.354	2	1359.7	1359.7	0	-3.9	2182	Non	351.63	175.41	175.41	8.22	13	>sp|Q8BTI8|SRRM2_MOUSE Serine/arginine repetitive matrix protein 2 OS=Mus musculus OX=10090 GN=Srrm2 PE=1 SV=3	38336	controllerType=0 controllerNumber=1 scan=12770	65.2492
01707:2	10	G.TARPPPSM[+15.995]SAAGLAA.R		M[+16]	707.358	2	1413.71	1413.72	0	-5.1	2144	Non	271.49	109.8	109.8	8.12	13	>sp|Q8BTI8|SRRM2_MOUSE Serine/arginine repetitive matrix protein 2 OS=Mus musculus OX=10090 GN=Srrm2 PE=1 SV=3	38336	controllerType=0 controllerNumber=1 scan=7070	51.4148
09926:2	10	M.SQVPAPVPLM[+15.995].S		M[+16]	527.78	2	1054.55	1054.56	0	-6.1	2161	Non	321.28	108.39	108.39	7.34	13	>sp|Q8BTI8|SRRM2_MOUSE Serine/arginine repetitive matrix protein 2 OS=Mus musculus OX=10090 GN=Srrm2 PE=1 SV=3	38336	controllerType=0 controllerNumber=1 scan=18823	84.8427
08761:2	10	R.TAPAANLASRIPAASA.A			741.403	2	1481.8	1481.81	0	-5.8	2174	CRagged	244.57	88.66	88.66	7.25	13	>sp|Q8BTI8|SRRM2_MOUSE Serine/arginine repetitive matrix protein 2 OS=Mus musculus OX=10090 GN=Srrm2 PE=1 SV=3	38336	controllerType=0 controllerNumber=1 scan=16263	73.5601
01984:2	10	G.TARPPPSM[+15.995]SAAGLA.A		M[+16]	671.841	2	1342.67	1342.68	0	-3.3	2144	Non	164.35	86.99	86.99	3.84	13	>sp|Q8BTI8|SRRM2_MOUSE Serine/arginine repetitive matrix protein 2 OS=Mus musculus OX=10090 GN=Srrm2 PE=1 SV=3	38336	controllerType=0 controllerNumber=1 scan=7504	52.7926
06688:2	10	G.TARPPPSMSAAGLAA.R			699.361	2	1397.71	1397.72	0	-4.5	2144	Non	212.83	0.77	0.77	3.23	13	>sp|Q8BTI8|SRRM2_MOUSE Serine/arginine repetitive matrix protein 2 OS=Mus musculus OX=10090 GN=Srrm2 PE=1 SV=3	38336	controllerType=0 controllerNumber=1 scan=13568	67.317
03221:2	10	G.TAPVNIAGSRTPAG.L			656.349	2	1311.69	1311.7	0	-8.7	2300	Non	146.78	1.69	1.69	2.27	13	>sp|Q8BTI8|SRRM2_MOUSE Serine/arginine repetitive matrix protein 2 OS=Mus musculus OX=10090 GN=Srrm2 PE=1 SV=3	38336	controllerType=0 controllerNumber=1 scan=9119	56.8221
07800:2	10	A.RM[+15.995]SQVPAPVPLM[+15.995].S		M[+16]*2	679.349	2	1357.69	1357.7	0	-4.2	2159	Non	208.01	5.22	5.22	2.14	13	>sp|Q8BTI8|SRRM2_MOUSE Serine/arginine repetitive matrix protein 2 OS=Mus musculus OX=10090 GN=Srrm2 PE=1 SV=3	38336	controllerType=0 controllerNumber=1 scan=15009	70.6567
00436:2	10	A.SRIPAASAAAM[+15.995]N.L		M[+16]	588.292	2	1175.58	1175.58	0	-6.2	2182	Non	103.38	17.3	17.3	2.14	13	>sp|Q8BTI8|SRRM2_MOUSE Serine/arginine repetitive matrix protein 2 OS=Mus musculus OX=10090 GN=Srrm2 PE=1 SV=3	38336	controllerType=0 controllerNumber=1 scan=4887	42.4923
05836:2	10	N.HAQSRIALALT.A			590.84	2	1180.67	1180.68	0	-5.9	2128	Non	224.44	13.39	13.39	2.13	13	>sp|Q8BTI8|SRRM2_MOUSE Serine/arginine repetitive matrix protein 2 OS=Mus musculus OX=10090 GN=Srrm2 PE=1 SV=3	38336	controllerType=0 controllerNumber=1 scan=12429	64.4656
10368:2	227	L.HNSIYPLAGINPQ.A			712.366	2	1423.72	1423.73	0	-6.2	1159	Non	253.07	49.58	49.58	4.16	2	>sp|Q8BM75|ARI5B_MOUSE AT-rich interactive domain-containing protein 5B OS=Mus musculus OX=10090 GN=Arid5b PE=1 SV=3	53059	controllerType=0 controllerNumber=1 scan=19469	86.7587
05892:2	227	L.QYLKNQTVL.S			553.811	2	1106.61	1106.62	0	-5.4	1104	Non	249.8	52.45	52.45	2.5	2	>sp|Q8BM75|ARI5B_MOUSE AT-rich interactive domain-containing protein 5B OS=Mus musculus OX=10090 GN=Arid5b PE=1 SV=3	53059	controllerType=0 controllerNumber=1 scan=12499	64.6274
09188:2	264	H.VYLPTHTSL.L			515.78	2	1030.55	1030.56	0	-4.3	431	Non	305.05	69.47	69.47	4.24	2	>sp|Q8BM54|MYLIP_MOUSE E3 ubiquitin-protein ligase MYLIP OS=Mus musculus OX=10090 GN=Mylip PE=1 SV=1	48117	controllerType=0 controllerNumber=1 scan=16843	75.0136
10433:2	264	H.VYLPTHTS[+79.966]L.L		S[+80]	555.763	2	1110.52	1110.52	0	-4.6	431	Non	252.83	17.47	17.47	1.61	2	>sp|Q8BM54|MYLIP_MOUSE E3 ubiquitin-protein ligase MYLIP OS=Mus musculus OX=10090 GN=Mylip PE=1 SV=1	48117	controllerType=0 controllerNumber=1 scan=19562	87.0278
05961:2	380	G.HTNSFPSLEN.S			573.262	2	1145.52	1145.52	0	-4.9	280	Non	260.81	92.94	92.94	3.11	2	>sp|Q8BHI7|ELOV5_MOUSE Elongation of very long chain fatty acids protein 5 OS=Mus musculus OX=10090 GN=Elovl5 PE=1 SV=1	46640	controllerType=0 controllerNumber=1 scan=12580	64.7875
05496:2	391	V.SYSPNQKLL.A			525.282	2	1049.56	1049.56	0	-5.4	555	Non	304.73	37.09	37.09	2.82	1	>sp|Q8BHB4|WDR3_MOUSE WD repeat-containing protein 3 OS=Mus musculus OX=10090 GN=Wdr3 PE=1 SV=1	44462	controllerType=0 controllerNumber=1 scan=12015	63.5797
04810:2	421	S.SYKQNLENL.F			554.783	2	1108.56	1108.56	0	-4.9	138	Non	311.87	27.55	27.55	2.5	1	>sp|Q8BGX1|PED1B_MOUSE PC-esterase domain-containing protein 1B OS=Mus musculus OX=10090 GN=Pced1b PE=2 SV=1	48054	controllerType=0 controllerNumber=1 scan=11126	61.5431
08202:2	292	K.SSTSFANIQENAT.-			685.311	2	1369.61	1369.62	0	-5.9	326	CRagged	293.89	110.52	110.52	4.67	1	>sp|Q8BGT0|OSTM1_MOUSE Osteopetrosis-associated transmembrane protein 1 OS=Mus musculus OX=10090 GN=Ostm1 PE=1 SV=1	51308	controllerType=0 controllerNumber=1 scan=15532	71.8692
10889:2	179	N.FYTLTPKEL.G			556.302	2	1111.6	1111.6	0	-5.5	31	Non	336.49	102.78	102.78	7.59	1	>sp|Q8BG48|ST17B_MOUSE Serine/threonine-protein kinase 17B OS=Mus musculus OX=10090 GN=Stk17b PE=1 SV=1	37105	controllerType=0 controllerNumber=1 scan=20267	89.3448
10743:2	313	S.SYVVDLTRV.T			526.289	2	1051.57	1051.58	0	-7.5	297	Non	280.57	77.47	77.47	4.35	1	>sp|Q8BG40|KTNB1_MOUSE Katanin p80 WD40 repeat-containing subunit B1 OS=Mus musculus OX=10090 GN=Katnb1 PE=1 SV=1	41960	controllerType=0 controllerNumber=1 scan=20032	88.5507
12867:2	97	T.TISDLDLSGARLLG.L			715.892	2	1430.78	1430.78	0	-5.2	110	Non	335.47	113.65	113.65	9.36	1	>sp|Q8BG17|NOL12_MOUSE Nucleolar protein 12 OS=Mus musculus OX=10090 GN=Nol12 PE=1 SV=1	49808	controllerType=0 controllerNumber=1 scan=23933	104.808
10377:2	354	D.TYIPVPTRDL.D			587.823	2	1174.64	1174.65	0	-6.9	245	Non	239.81	39.4	39.4	3.39	2	>sp|Q8BFR5|EFTU_MOUSE Elongation factor Tu, mitochondrial OS=Mus musculus OX=10090 GN=Tufm PE=1 SV=1	46680	controllerType=0 controllerNumber=1 scan=19484	86.8141
04691:2	472	S.LYLPNKAET.-			524.784	2	1048.56	1048.57	0	-6.2	485	Non	302.87	29.3	29.3	1.4	2	>sp|Q8BFQ9|KLH42_MOUSE Kelch-like protein 42 OS=Mus musculus OX=10090 GN=Klhl42 PE=2 SV=1	46841	controllerType=0 controllerNumber=1 scan=10966	61.1473
03201:2	188	S.TQISPRPQINPS.R			669.359	2	1337.71	1337.72	0	-4.9	645	Non	251.76	111.28	111.28	7.54	1	>sp|Q80XC3|US6NL_MOUSE USP6 N-terminal-like protein OS=Mus musculus OX=10090 GN=Usp6nl PE=1 SV=2	43551	controllerType=0 controllerNumber=1 scan=9096	56.772
05937:2	84	A.QGPGLKEAF.T			473.751	2	946.495	946.499	0	-4.7	1334	Non	361.95	143.29	143.29	7.99	3	>sp|Q80X90|FLNB_MOUSE Filamin-B OS=Mus musculus OX=10090 GN=Flnb PE=1 SV=3	46016	controllerType=0 controllerNumber=1 scan=12553	64.7341
10894:2	84	V.SYLPTKPGEYF.V			651.32	2	1301.63	1301.64	0	-7.2	1098	Non	239.84	36.71	36.71	4.49	3	>sp|Q80X90|FLNB_MOUSE Filamin-B OS=Mus musculus OX=10090 GN=Flnb PE=1 SV=3	46016	controllerType=0 controllerNumber=1 scan=20274	89.3615
06785:1	84	K.YSVA.V			439.226	1	439.226	439.219	0	17	523	CRagged	97.8	97.8	97.8	1.69	3	>sp|Q80X90|FLNB_MOUSE Filamin-B OS=Mus musculus OX=10090 GN=Flnb PE=1 SV=3	46016	controllerType=0 controllerNumber=1 scan=13699	67.6373
10341:2	122	R.TPYEAYDPIGKYA.T			744.35	2	1487.69	1487.71	0	-9	751	CRagged	258.33	115	115	5.73	4	>sp|Q80W68|KIRR1_MOUSE Kin of IRRE-like protein 1 OS=Mus musculus OX=10090 GN=Kirrel1 PE=1 SV=1	41839	controllerType=0 controllerNumber=1 scan=19428	86.6325
06375:2	122	N.SHPFPGAAGYPT.Y			601.282	2	1201.56	1201.56	0	-5.2	724	Non	249.4	60.34	60.34	4.59	4	>sp|Q80W68|KIRR1_MOUSE Kin of IRRE-like protein 1 OS=Mus musculus OX=10090 GN=Kirrel1 PE=1 SV=1	41839	controllerType=0 controllerNumber=1 scan=13105	65.97
06039:2	122	S.HPFPGAAGYPT.Y			557.766	2	1114.53	1114.53	0	-6	725	Non	240.58	26.38	26.38	2.92	4	>sp|Q80W68|KIRR1_MOUSE Kin of IRRE-like protein 1 OS=Mus musculus OX=10090 GN=Kirrel1 PE=1 SV=1	41839	controllerType=0 controllerNumber=1 scan=12680	65.0193
03375:2	122	S.HSSGYAQLNTYS.R			664.293	2	1327.58	1327.59	0	-8.8	675	Non	72.43	9.52	9.52	1.48	4	>sp|Q80W68|KIRR1_MOUSE Kin of IRRE-like protein 1 OS=Mus musculus OX=10090 GN=Kirrel1 PE=1 SV=1	41839	controllerType=0 controllerNumber=1 scan=9311	57.2659
08522:2	14	G.SSGNTASFGTLASQ.N			664.308	2	1327.61	1327.61	0	-3.2	2023	Non	405.13	186.48	186.48	8.45	12	>sp|Q80U93|NU214_MOUSE Nuclear pore complex protein Nup214 OS=Mus musculus OX=10090 GN=Nup214 PE=1 SV=2	49776	controllerType=0 controllerNumber=1 scan=15949	72.8299
09407:2	14	K.TVPQVVNVQELR.S			691.39	2	1381.77	1381.78	0	-5.3	1124	Specific	407.45	194.31	194.31	7.66	12	>sp|Q80U93|NU214_MOUSE Nuclear pore complex protein Nup214 OS=Mus musculus OX=10090 GN=Nup214 PE=1 SV=2	49776	controllerType=0 controllerNumber=1 scan=17912	81.5939
11005:2	14	G.TLASQNAPTFGSLS.Q			697.348	2	1393.69	1393.7	0	-4.7	2032	Non	241.16	86.2	86.2	7.06	12	>sp|Q80U93|NU214_MOUSE Nuclear pore complex protein Nup214 OS=Mus musculus OX=10090 GN=Nup214 PE=1 SV=2	49776	controllerType=0 controllerNumber=1 scan=20474	90.1145
07603:2	14	S.SNSSVQGFGGWRS.-			684.814	2	1368.62	1368.63	0	-6.4	2073	Non	257.81	93.02	93.02	6.14	12	>sp|Q80U93|NU214_MOUSE Nuclear pore complex protein Nup214 OS=Mus musculus OX=10090 GN=Nup214 PE=1 SV=2	49776	controllerType=0 controllerNumber=1 scan=14748	70.044
09444:2	14	S.TPNKTGGFGAAPVFG.S			710.861	2	1420.72	1420.72	0	-4.7	1958	Non	228.86	55	55	5.12	12	>sp|Q80U93|NU214_MOUSE Nuclear pore complex protein Nup214 OS=Mus musculus OX=10090 GN=Nup214 PE=1 SV=2	49776	controllerType=0 controllerNumber=1 scan=18025	82.1789
09589:2	14	R.STAPASLSRSAFL.S			654.35	2	1307.69	1307.7	0	-2.8	951	CRagged	241.04	62.51	62.51	4.42	12	>sp|Q80U93|NU214_MOUSE Nuclear pore complex protein Nup214 OS=Mus musculus OX=10090 GN=Nup214 PE=1 SV=2	49776	controllerType=0 controllerNumber=1 scan=18306	83.2691
07547:2	14	G.SSNSSVQGFGGWRS.-			728.329	2	1455.65	1455.66	0	-7	2072	Non	219.06	26.4	26.4	3.06	12	>sp|Q80U93|NU214_MOUSE Nuclear pore complex protein Nup214 OS=Mus musculus OX=10090 GN=Nup214 PE=1 SV=2	49776	controllerType=0 controllerNumber=1 scan=14679	69.8913
06429:2	14	S.HPTPLPASSSSM[+15.995]PL.K		M[+16]	719.352	2	1437.7	1437.7	0	-4.8	619	Non	137.05	5.11	5.11	2.14	12	>sp|Q80U93|NU214_MOUSE Nuclear pore complex protein Nup214 OS=Mus musculus OX=10090 GN=Nup214 PE=1 SV=2	49776	controllerType=0 controllerNumber=1 scan=13172	66.11
09746:2	14	S.TPNKTGGFGAAPVF.G			682.351	2	1363.69	1363.7	0	-4.3	1958	Non	144.51	5.22	5.22	2.14	12	>sp|Q80U93|NU214_MOUSE Nuclear pore complex protein Nup214 OS=Mus musculus OX=10090 GN=Nup214 PE=1 SV=2	49776	controllerType=0 controllerNumber=1 scan=18548	84.0078
03645:2	14	L.SFGGLLSSPSAS.S			555.273	2	1109.54	1109.55	0	-7.8	1485	Non	144.8	0.63	0.63	1.53	12	>sp|Q80U93|NU214_MOUSE Nuclear pore complex protein Nup214 OS=Mus musculus OX=10090 GN=Nup214 PE=1 SV=2	49776	controllerType=0 controllerNumber=1 scan=9650	58.0805
07258:2	211	R.VYNQLRASL.Q			532.296	2	1063.58	1063.59	0	-4.6	997	CRagged	315.25	102.42	102.42	6.5	2	>sp|Q80TM9|NISCH_MOUSE Nischarin OS=Mus musculus OX=10090 GN=Nisch PE=1 SV=2	49927	controllerType=0 controllerNumber=1 scan=14303	69.0285
11163:2	211	K.GEQLLGAGEVFAI.R			652.345	2	1303.68	1303.69	0	-5.8	138	CRagged	216.83	50.1	50.1	3.05	2	>sp|Q80TM9|NISCH_MOUSE Nischarin OS=Mus musculus OX=10090 GN=Nisch PE=1 SV=2	49927	controllerType=0 controllerNumber=1 scan=20735	91.0704
06538:2	407	T.TLPAPTTQAPLR.G			633.361	2	1265.71	1265.72	0	-5.2	1102	NRagged	229.46	68.62	68.62	2.63	2	>sp|Q7TT18|MCAF1_MOUSE Activating transcription factor 7-interacting protein 1 OS=Mus musculus OX=10090 GN=Atf7ip PE=1 SV=1	47194	controllerType=0 controllerNumber=1 scan=13306	66.4033
11908:2	243	K.TYIPKDFATLYQ.G			730.371	2	1459.73	1459.75	0	-8.1	1052	CRagged	274	102.35	102.35	5.37	1	>sp|Q7TSH3|ZN516_MOUSE Zinc finger protein 516 OS=Mus musculus OX=10090 GN=Znf516 PE=1 SV=1	49419	controllerType=0 controllerNumber=1 scan=22068	96.5142
06659:2	297	R.GYVVGRAAL.T			453.262	2	905.517	905.52	0	-4	291	CRagged	354.76	105.29	105.29	4.62	1	>sp|Q7TSG3|FBX5_MOUSE F-box only protein 5 OS=Mus musculus OX=10090 GN=Fbxo5 PE=1 SV=1	46278	controllerType=0 controllerNumber=1 scan=13515	67.1313
07351:2	29	W.KYLSVQGQL.F			518.293	2	1035.58	1035.58	0	-5.3	361	Non	403.28	112.76	112.76	7.7	3	>sp|Q791T5|MTCH1_MOUSE Mitochondrial carrier homolog 1 OS=Mus musculus OX=10090 GN=Mtch1 PE=1 SV=1	48130	controllerType=0 controllerNumber=1 scan=14419	69.269
11148:2	29	W.KYLSVQGQLF.R			591.827	2	1182.65	1182.65	0	-5	361	Non	345.63	143.07	143.07	7.39	3	>sp|Q791T5|MTCH1_MOUSE Mitochondrial carrier homolog 1 OS=Mus musculus OX=10090 GN=Mtch1 PE=1 SV=1	48130	controllerType=0 controllerNumber=1 scan=20707	90.9601
09320:2	29	A.KYSGVLSSI.G			477.267	2	953.527	953.53	0	-3.6	232	Non	388.33	100.17	100.17	6.02	3	>sp|Q791T5|MTCH1_MOUSE Mitochondrial carrier homolog 1 OS=Mus musculus OX=10090 GN=Mtch1 PE=1 SV=1	48130	controllerType=0 controllerNumber=1 scan=17226	77.0043
12919:2	473	V.SYWSVGETI.A			521.245	2	1041.48	1041.49	0	-6.1	184	Non	287.72	41.74	41.74	1.59	1	>sp|Q78IS1|TMED3_MOUSE Transmembrane emp24 domain-containing protein 3 OS=Mus musculus OX=10090 GN=Tmed3 PE=1 SV=1	44124	controllerType=0 controllerNumber=1 scan=24000	104.954
13002:2	256	K.EYQEIITEL.R			569.283	2	1137.56	1137.57	0	-7.3	1241	CRagged	460.08	113.49	113.49	5.23	1	>sp|Q6RT24|CENPE_MOUSE Centromere-associated protein E OS=Mus musculus OX=10090 GN=Cenpe PE=1 SV=1	40519	controllerType=0 controllerNumber=1 scan=24095	105.122
08714:2	381	W.SPLASPSTSILK.R			600.843	2	1200.68	1200.68	0	-3.4	2121	NRagged	299.1	46.44	46.44	2.93	2	>sp|Q6PR54|RIF1_MOUSE Telomere-associated protein RIF1 OS=Mus musculus OX=10090 GN=Rif1 PE=1 SV=2	36875	controllerType=0 controllerNumber=1 scan=16195	73.3879
09890:2	41	S.SSPVLPNGHQPLL.Q			679.871	2	1358.74	1358.74	0	-5.2	1066	Non	309.36	134.5	134.5	8.42	2	>sp|Q6PGL7|WASC2_MOUSE WASH complex subunit 2 OS=Mus musculus OX=10090 GN=Washc2 PE=1 SV=1	44771	controllerType=0 controllerNumber=1 scan=18774	84.7209
07301:2	41	K.TEPAQDSSGLTPFK.S			739.359	2	1477.71	1477.72	0	-4.3	928	Specific	437.14	283.92	283.92	8.35	2	>sp|Q6PGL7|WASC2_MOUSE WASH complex subunit 2 OS=Mus musculus OX=10090 GN=Washc2 PE=1 SV=1	44771	controllerType=0 controllerNumber=1 scan=14358	69.1464
07805:2	156	K.SRVPLGPSALQ.N			562.822	2	1124.64	1124.64	0	-5.3	692	CRagged	344.51	124.13	124.13	7.93	1	>sp|Q6PFD6|KI18B_MOUSE Kinesin-like protein KIF18B OS=Mus musculus OX=10090 GN=Kif18b PE=2 SV=2	41439	controllerType=0 controllerNumber=1 scan=15016	70.6749
07680:2	205	L.GHCQLAEPLRLD.L			676.338	2	1351.67	1351.68	0	-6.6	354	Non	292.49	130.85	130.85	7.31	1	>sp|Q6PAL7|AHDC1_MOUSE AT-hook DNA-binding motif-containing protein 1 OS=Mus musculus OX=10090 GN=Ahdc1 PE=1 SV=1	52891	controllerType=0 controllerNumber=1 scan=14852	70.2975
04482:2	141	D.TELASAAAGTSLR.H			624.33	2	1247.65	1247.66	0	-5.3	1136	NRagged	364.45	178.21	178.21	8.16	1	>sp|Q6P9Q6|FKB15_MOUSE FK506-binding protein 15 OS=Mus musculus OX=10090 GN=Fkbp15 PE=1 SV=2	46242	controllerType=0 controllerNumber=1 scan=10705	60.5587
08123:2	37	G.SPVHLGPSQPL.K			566.308	2	1131.61	1131.62	0	-5.4	1837	Non	373.02	126.67	126.67	8.71	4	>sp|Q6P5H2|NEST_MOUSE Nestin OS=Mus musculus OX=10090 GN=Nes PE=1 SV=1	53403	controllerType=0 controllerNumber=1 scan=15418	71.5673
03028:3	37	G.SPVHLGPSQPLK.F			420.572	3	1259.7	1259.71	0	-8.5	1837	NRagged	435.91	248.3	248.3	7.92	4	>sp|Q6P5H2|NEST_MOUSE Nestin OS=Mus musculus OX=10090 GN=Nes PE=1 SV=1	53403	controllerType=0 controllerNumber=1 scan=8877	56.2347
11541:2	37	F.SSPLPNTLETPVT.A			678.35	2	1355.69	1355.71	0	-9	358	Non	205.83	60.25	60.25	3.11	4	>sp|Q6P5H2|NEST_MOUSE Nestin OS=Mus musculus OX=10090 GN=Nes PE=1 SV=1	53403	controllerType=0 controllerNumber=1 scan=21393	93.6486
03981:2	223	H.YYIHGPKGNEI.S			645.823	2	1290.64	1290.65	0	-7.4	352	Non	336.92	147.91	147.91	5.71	2	>sp|Q6P5D8|SMHD1_MOUSE Structural maintenance of chromosomes flexible hinge domain-containing protein 1 OS=Mus musculus OX=10090 GN=Smchd1 PE=1 SV=2	37682	controllerType=0 controllerNumber=1 scan=10074	59.0976
05191:2	162	Q.HQVLPQQPLQ.L			594.327	2	1187.65	1187.65	0	-4.6	554	Non	364.12	154.37	154.37	7.83	1	>sp|Q6NZQ4|PAXI1_MOUSE PAX-interacting protein 1 OS=Mus musculus OX=10090 GN=Paxip1 PE=1 SV=1	50937	controllerType=0 controllerNumber=1 scan=11612	62.6225
06880:2	187	K.TGAVRIGQL.V			457.771	2	914.535	914.542	0	-6.9	630	CRagged	329.4	75.15	75.15	6.28	3	>sp|Q6NS46|RRP5_MOUSE Protein RRP5 homolog OS=Mus musculus OX=10090 GN=Pdcd11 PE=1 SV=2	49039	controllerType=0 controllerNumber=1 scan=13810	67.8687
05197:2	187	E.HFVEGQTVV.A			508.262	2	1015.52	1015.52	0	-5	772	Non	234.85	36.8	36.8	3.62	3	>sp|Q6NS46|RRP5_MOUSE Protein RRP5 homolog OS=Mus musculus OX=10090 GN=Pdcd11 PE=1 SV=2	49039	controllerType=0 controllerNumber=1 scan=11622	62.6504
07367:2	398	K.HGVSLIPAY.A			478.761	2	956.515	956.52	0	-5.4	215	CRagged	276.11	81.1	81.1	2.75	1	>sp|Q6E1M8|AWAT2_MOUSE Acyl-CoA wax alcohol acyltransferase 2 OS=Mus musculus OX=10090 GN=Awat2 PE=2 SV=1	39796	controllerType=0 controllerNumber=1 scan=14438	69.3075
07368:2	57	L.SEYNVTNNSIALR.T			740.87	2	1480.73	1480.74	0	-4.4	339	NRagged	503	284.94	284.94	9.03	5	>sp|Q6A068|CDC5L_MOUSE Cell division cycle 5-like protein OS=Mus musculus OX=10090 GN=Cdc5l PE=1 SV=2	40453	controllerType=0 controllerNumber=1 scan=14440	69.3095
06683:2	57	S.EYNVTNNSI.A			527.244	2	1053.48	1053.48	0	-4.7	340	Non	342.97	6.95	6.95	5.07	5	>sp|Q6A068|CDC5L_MOUSE Cell division cycle 5-like protein OS=Mus musculus OX=10090 GN=Cdc5l PE=1 SV=2	40453	controllerType=0 controllerNumber=1 scan=13559	67.2908
11145:2	57	L.SEYNVTNNSIAL.R			662.82	2	1324.63	1324.64	0	-3.3	339	Non	185.35	44.99	44.99	2.58	5	>sp|Q6A068|CDC5L_MOUSE Cell division cycle 5-like protein OS=Mus musculus OX=10090 GN=Cdc5l PE=1 SV=2	40453	controllerType=0 controllerNumber=1 scan=20702	90.948
03513:2	57	R.SKLVLPAP.Q			412.764	2	824.521	824.524	0	-3.4	293	CRagged	148.18	50.9	50.9	1.7	5	>sp|Q6A068|CDC5L_MOUSE Cell division cycle 5-like protein OS=Mus musculus OX=10090 GN=Cdc5l PE=1 SV=2	40453	controllerType=0 controllerNumber=1 scan=9483	57.681
06855:2	204	Q.SLLTSQENSSTTSP.A			726.343	2	1451.68	1451.69	0	-5.5	460	Non	257.12	104.07	104.07	7.28	1	>sp|Q64735|CR1L_MOUSE Complement component receptor 1-like protein OS=Mus musculus OX=10090 GN=Cr1l PE=1 SV=1	50484	controllerType=0 controllerNumber=1 scan=13781	67.8089
00984:2	12	S.SKEVDPSTGELQ.S			645.31	2	1289.61	1289.62	0	-7.1	345	Non	367.95	182.4	182.4	8.55	7	>sp|Q64337|SQSTM_MOUSE Sequestosome-1 OS=Mus musculus OX=10090 GN=Sqstm1 PE=1 SV=1	38213	controllerType=0 controllerNumber=1 scan=6001	47.9262
05963:2	12	E.SEGPSSLDPSQEGPT.G			744.324	2	1487.64	1487.65	0	-5.3	363	Non	291.32	168.16	168.16	8.41	7	>sp|Q64337|SQSTM_MOUSE Sequestosome-1 OS=Mus musculus OX=10090 GN=Sqstm1 PE=1 SV=1	38213	controllerType=0 controllerNumber=1 scan=12582	64.7903
08056:2	12	P.HLPPEADPRLIE.S			693.869	2	1386.73	1386.74	0	-5.3	387	Non	286.72	82.9	82.9	7.24	7	>sp|Q64337|SQSTM_MOUSE Sequestosome-1 OS=Mus musculus OX=10090 GN=Sqstm1 PE=1 SV=1	38213	controllerType=0 controllerNumber=1 scan=15326	71.339
12358:2	12	A.SAPPEDPNVNFL.K			650.312	2	1299.62	1299.62	0	-4.4	226	Non	254.24	69.9	69.9	6.63	7	>sp|Q64337|SQSTM_MOUSE Sequestosome-1 OS=Mus musculus OX=10090 GN=Sqstm1 PE=1 SV=1	38213	controllerType=0 controllerNumber=1 scan=22941	100.527
07292:2	12	Q.TKNYDIGAALD.T			590.793	2	1180.58	1180.58	0	-4.7	421	Non	269.02	72.96	72.96	6.19	7	>sp|Q64337|SQSTM_MOUSE Sequestosome-1 OS=Mus musculus OX=10090 GN=Sqstm1 PE=1 SV=1	38213	controllerType=0 controllerNumber=1 scan=14346	69.1186
08260:2	12	Q.TKNYDIGAALDT.I			641.317	2	1281.63	1281.63	0	-4	421	Non	242.97	35.58	35.58	3.15	7	>sp|Q64337|SQSTM_MOUSE Sequestosome-1 OS=Mus musculus OX=10090 GN=Sqstm1 PE=1 SV=1	38213	controllerType=0 controllerNumber=1 scan=15611	72.0616
04132:2	12	P.HLPPEADPRL.I			572.805	2	1144.6	1144.61	0	-6.8	387	Non	175.09	26.83	26.83	1.87	7	>sp|Q64337|SQSTM_MOUSE Sequestosome-1 OS=Mus musculus OX=10090 GN=Sqstm1 PE=1 SV=1	38213	controllerType=0 controllerNumber=1 scan=10270	59.5588
03497:2	345	T.TPSQPITTPQYH.Q			685.336	2	1369.67	1369.67	0	-6.8	1625	Non	220.56	89.92	89.92	3.83	1	>sp|Q62383|SPT6H_MOUSE Transcription elongation factor SPT6 OS=Mus musculus OX=10090 GN=Supt6h PE=1 SV=2	37232	controllerType=0 controllerNumber=1 scan=9463	57.6369
09400:2	148	R.TAAEVAGQLIIK.L			607.359	2	1213.71	1213.71	0	-4.2	592	Specific	580.03	329.81	329.81	7.82	3	>sp|Q62351|TFR1_MOUSE Transferrin receptor protein 1 OS=Mus musculus OX=10090 GN=Tfrc PE=1 SV=1	38969	controllerType=0 controllerNumber=1 scan=17868	81.3155
10813:2	148	F.SNLFGGEPLSYTR.F			720.855	2	1440.7	1440.71	0	-5.8	10	NRagged	165.72	2.81	2.81	2.17	3	>sp|Q62351|TFR1_MOUSE Transferrin receptor protein 1 OS=Mus musculus OX=10090 GN=Tfrc PE=1 SV=1	38969	controllerType=0 controllerNumber=1 scan=20141	88.9193
07178:2	262	R.SGEGEVSGLLR.K			552.285	2	1103.56	1103.57	0	-5.2	473	Specific	358.55	97.51	97.51	5.12	1	>sp|Q62318|TIF1B_MOUSE Transcription intermediary factor 1-beta OS=Mus musculus OX=10090 GN=Trim28 PE=1 SV=3	44972	controllerType=0 controllerNumber=1 scan=14188	68.7231
06971:2	387	A.TYTSARTLL.A			513.281	2	1025.56	1025.56	0	-7.2	599	Non	275.53	53.92	53.92	1.95	2	>sp|Q61881|MCM7_MOUSE DNA replication licensing factor MCM7 OS=Mus musculus OX=10090 GN=Mcm7 PE=1 SV=1	47689	controllerType=0 controllerNumber=1 scan=13926	68.1274
05039:2	96	Q.SVAGGM[+15.995]QPPPLQ.R		M[+16]	599.297	2	1197.59	1197.59	0	-6	2445	Non	371.57	122.25	122.25	8.77	2	>sp|Q61687|ATRX_MOUSE Transcriptional regulator ATRX OS=Mus musculus OX=10090 GN=Atrx PE=1 SV=3	39794	controllerType=0 controllerNumber=1 scan=11419	62.2046
02346:1	96	R.ATPK.R			416.248	1	416.248	416.25	0	-6.5	1171	Specific	132.3	132.3	132.3	1.53	2	>sp|Q61687|ATRX_MOUSE Transcriptional regulator ATRX OS=Mus musculus OX=10090 GN=Atrx PE=1 SV=3	39794	controllerType=0 controllerNumber=1 scan=7990	54.1026
01736:3	87	D.HYLPDLHHM[+15.995].R		M[+16]	393.517	3	1178.54	1178.54	0	-4.4	871	Non	271.14	138.53	138.53	6.08	2	>sp|Q61001|LAMA5_MOUSE Laminin subunit alpha-5 OS=Mus musculus OX=10090 GN=Lama5 PE=1 SV=4	41886	controllerType=0 controllerNumber=1 scan=7106	51.4995
02285:2	87	L.SPGAPPEGPQPRPP.T			692.349	2	1383.69	1383.7	0	-8	1260	Non	217.68	109.23	109.23	5.74	2	>sp|Q61001|LAMA5_MOUSE Laminin subunit alpha-5 OS=Mus musculus OX=10090 GN=Lama5 PE=1 SV=4	41886	controllerType=0 controllerNumber=1 scan=7910	53.8888
06697:2	16	Q.SQFTAPRDYSGY.Q			696.313	2	1391.62	1391.62	0	-3.2	652	Non	396.91	221.19	221.19	8.34	10	>sp|Q60865|CAPR1_MOUSE Caprin-1 OS=Mus musculus OX=10090 GN=Caprin1 PE=1 SV=2	40409	controllerType=0 controllerNumber=1 scan=13580	67.3468
04808:2	16	N.TGFPRSSQPYYN.S			708.827	2	1416.65	1416.65	0	-4.6	593	Non	261.22	92.25	92.25	6.7	10	>sp|Q60865|CAPR1_MOUSE Caprin-1 OS=Mus musculus OX=10090 GN=Caprin1 PE=1 SV=2	40409	controllerType=0 controllerNumber=1 scan=11123	61.5389
03831:2	16	Y.SQSQFTAPRDY.S			650.299	2	1299.59	1299.6	0	-5	650	Non	254.28	74.48	74.48	6.43	10	>sp|Q60865|CAPR1_MOUSE Caprin-1 OS=Mus musculus OX=10090 GN=Caprin1 PE=1 SV=2	40409	controllerType=0 controllerNumber=1 scan=9888	58.6604
06588:2	16	N.TGFPRSSQPYY.N			651.807	2	1302.61	1302.61	0	-3.9	593	Non	251.61	69.31	69.31	5.42	10	>sp|Q60865|CAPR1_MOUSE Caprin-1 OS=Mus musculus OX=10090 GN=Caprin1 PE=1 SV=2	40409	controllerType=0 controllerNumber=1 scan=13410	66.8278
02485:2	16	Q.SQFTAPRDYSG.Y			614.779	2	1228.55	1228.56	0	-7.5	652	Non	194.19	88.15	88.15	3.74	10	>sp|Q60865|CAPR1_MOUSE Caprin-1 OS=Mus musculus OX=10090 GN=Caprin1 PE=1 SV=2	40409	controllerType=0 controllerNumber=1 scan=8173	54.561
02198:2	16	S.KYQEVTNNL.E			554.78	2	1108.55	1108.56	0	-9.7	96	Non	203.07	58.07	58.07	2.14	10	>sp|Q60865|CAPR1_MOUSE Caprin-1 OS=Mus musculus OX=10090 GN=Caprin1 PE=1 SV=2	40409	controllerType=0 controllerNumber=1 scan=7797	53.5938
08448:2	16	K.QGLSGVPIL.S			442.269	2	883.531	883.525	0	7.2	168	CRagged	235.2	50.47	50.47	2.14	10	>sp|Q60865|CAPR1_MOUSE Caprin-1 OS=Mus musculus OX=10090 GN=Caprin1 PE=1 SV=2	40409	controllerType=0 controllerNumber=1 scan=15851	72.5999
03001:2	16	Y.SGYQRDGYQQNF.K			731.817	2	1462.63	1462.63	0	-5.3	661	Non	111.15	25.37	25.37	2.14	10	>sp|Q60865|CAPR1_MOUSE Caprin-1 OS=Mus musculus OX=10090 GN=Caprin1 PE=1 SV=2	40409	controllerType=0 controllerNumber=1 scan=8843	56.1596
08230:2	16	N.TPNSGYSQSQFTAP.R			742.832	2	1484.66	1484.67	0	-5.3	644	Non	133.98	1.82	1.82	2.06	10	>sp|Q60865|CAPR1_MOUSE Caprin-1 OS=Mus musculus OX=10090 GN=Caprin1 PE=1 SV=2	40409	controllerType=0 controllerNumber=1 scan=15569	71.9501
04601:2	16	S.NTPNSGYSQSQFT.A			715.807	2	1430.61	1430.62	0	-8.5	643	Non	48.13	4.24	4.24	1.58	10	>sp|Q60865|CAPR1_MOUSE Caprin-1 OS=Mus musculus OX=10090 GN=Caprin1 PE=1 SV=2	40409	controllerType=0 controllerNumber=1 scan=10850	60.883
06621:2	121	Y.SQSQGESEYYDY.G			728.276	2	1455.54	1455.55	0	-6.8	388	Non	305.17	163.23	163.23	8.51	2	>sp|Q60749|KHDR1_MOUSE KH domain-containing, RNA-binding, signal transduction-associated protein 1 OS=Mus musculus OX=10090 GN=Khdrbs1 PE=1 SV=2	41474	controllerType=0 controllerNumber=1 scan=13449	66.9054
06341:2	121	E.YYDYGHGEL.Q			558.732	2	1116.46	1116.46	0	-5.3	396	Non	219.67	51	51	2.14	2	>sp|Q60749|KHDR1_MOUSE KH domain-containing, RNA-binding, signal transduction-associated protein 1 OS=Mus musculus OX=10090 GN=Khdrbs1 PE=1 SV=2	41474	controllerType=0 controllerNumber=1 scan=13061	65.875
11765:2	355	N.SLGIPVPAAAGAQQ.-			640.351	2	1279.69	1279.7	0	-4.6	378	Non	233.2	72.19	72.19	3.36	1	>sp|Q60737|CSK21_MOUSE Casein kinase II subunit alpha OS=Mus musculus OX=10090 GN=Csnk2a1 PE=1 SV=2	39831	controllerType=0 controllerNumber=1 scan=21818	95.4695
10249:2	169	V.TYQLGFHSI.E			533.268	2	1065.53	1065.54	0	-6.9	93	Non	372.8	126.68	126.68	7.74	1	>sp|Q60692|PSB6_MOUSE Proteasome subunit beta type-6 OS=Mus musculus OX=10090 GN=Psmb6 PE=1 SV=3	48831	controllerType=0 controllerNumber=1 scan=19286	86.1879
07255:2	376	Q.SERQDSSAVGFDY.K			730.816	2	1460.62	1460.63	0	-3.1	277	Non	224.75	100.74	100.74	3.13	1	>sp|Q60598|SRC8_MOUSE Src substrate cortactin OS=Mus musculus OX=10090 GN=Cttn PE=1 SV=2	38303	controllerType=0 controllerNumber=1 scan=14298	69.0182
09550:2	440	G.KYQEALSYL.V			557.79	2	1114.57	1114.58	0	-5.3	887	Non	307.19	11.18	11.18	2.3	1	>sp|Q5I043|UBP28_MOUSE Ubiquitin carboxyl-terminal hydrolase 28 OS=Mus musculus OX=10090 GN=Usp28 PE=1 SV=1	43494	controllerType=0 controllerNumber=1 scan=18247	83.0963
11271:2	112	K.SVTSASFSNGPVLA.G			668.837	2	1336.67	1336.67	0	-5.7	407	CRagged	407.72	208.42	208.42	9.08	1	>sp|Q5F2E7|NUFP2_MOUSE Nuclear fragile X mental retardation-interacting protein 2 OS=Mus musculus OX=10090 GN=Nufip2 PE=1 SV=1	51868	controllerType=0 controllerNumber=1 scan=20945	91.9616
12155:2	106	T.TSISALGELTPQ.A			608.821	2	1216.63	1216.64	0	-6.5	680	Non	397.16	140.91	140.91	9.27	2	>sp|Q4VBD9|GZF1_MOUSE GDNF-inducible zinc finger protein 1 OS=Mus musculus OX=10090 GN=Gzf1 PE=1 SV=2	42222	controllerType=0 controllerNumber=1 scan=22535	98.6273
03276:2	461	A.YYSPTKNEI.V			557.771	2	1114.54	1114.54	0	-5.8	567	Non	248.77	61.28	61.28	1.74	1	>sp|Q4PZA2|ECE1_MOUSE Endothelin-converting enzyme 1 OS=Mus musculus OX=10090 GN=Ece1 PE=1 SV=1	39031	controllerType=0 controllerNumber=1 scan=9185	56.9629
11449:2	201	A.YYLNDLDRL.T			592.797	2	1184.59	1184.59	0	-5.9	154	Non	358.76	91	91	7.37	1	>sp|Q3V3I2|GNAT3_MOUSE Guanine nucleotide-binding protein G(t) subunit alpha-3 OS=Mus musculus OX=10090 GN=Gnat3 PE=1 SV=2	42573	controllerType=0 controllerNumber=1 scan=21239	93.0612
09839:2	336	L.GYLPGKGTGSLL.K			581.824	2	1162.64	1162.65	0	-5.1	147	Non	248.48	22.37	22.37	3.08	3	>sp|Q3UXZ9|KDM5A_MOUSE Lysine-specific demethylase 5A OS=Mus musculus OX=10090 GN=Kdm5a PE=1 SV=2	41381	controllerType=0 controllerNumber=1 scan=18693	84.4519
06407:2	336	L.GYLPGKGTGSL.L			525.282	2	1049.56	1049.56	0	-5.1	147	Non	249.08	4.03	4.03	1.76	3	>sp|Q3UXZ9|KDM5A_MOUSE Lysine-specific demethylase 5A OS=Mus musculus OX=10090 GN=Kdm5a PE=1 SV=2	41381	controllerType=0 controllerNumber=1 scan=13145	66.0521
06662:2	175	D.SYLVSKQEL.L			533.79	2	1066.57	1066.58	0	-4.9	347	Non	391.65	122.38	122.38	7.45	2	>sp|Q3UM18|LSG1_MOUSE Large subunit GTPase 1 homolog OS=Mus musculus OX=10090 GN=Lsg1 PE=1 SV=2	48024	controllerType=0 controllerNumber=1 scan=13519	67.1391
03385:2	175	V.GYPNVGKSSTI.N			561.788	2	1122.57	1122.58	0	-8.3	379	Non	188.91	50.59	50.59	2.24	2	>sp|Q3UM18|LSG1_MOUSE Large subunit GTPase 1 homolog OS=Mus musculus OX=10090 GN=Lsg1 PE=1 SV=2	48024	controllerType=0 controllerNumber=1 scan=9323	57.2935
11004:2	382	Q.THFDQNVLNFD.-			675.306	2	1349.61	1349.61	0	-4.8	804	Non	243.35	96.41	96.41	3.07	2	>sp|Q3UKC1|TAXB1_MOUSE Tax1-binding protein 1 homolog OS=Mus musculus OX=10090 GN=Tax1bp1 PE=1 SV=2	38659	controllerType=0 controllerNumber=1 scan=20473	90.1109
07804:2	497	E.FSSSGVPSCPK.S			548.257	2	1095.51	1095.51	0	-5.7	687	NRagged	252.63	62.38	62.38	1.39	1	>sp|Q3UFT3|GARE1_MOUSE GRB2-associated and regulator of MAPK protein OS=Mus musculus OX=10090 GN=Garem1 PE=1 SV=2	50050	controllerType=0 controllerNumber=1 scan=15015	70.6731
11272:2	166	L.YYLQIHPQEL.R			652.334	2	1303.66	1303.67	0	-5.3	517	Non	364.56	160.45	160.45	7.72	2	>sp|Q3U1J4|DDB1_MOUSE DNA damage-binding protein 1 OS=Mus musculus OX=10090 GN=Ddb1 PE=1 SV=2	39040	controllerType=0 controllerNumber=1 scan=20946	91.9668
06510:2	401	Q.TSKYFSPPPPA.R			596.303	2	1191.6	1191.6	0	-5.4	1413	Non	248.35	48.82	48.82	2.68	1	>sp|Q3TYD6|LMTK2_MOUSE Serine/threonine-protein kinase LMTK2 OS=Mus musculus OX=10090 GN=Lmtk2 PE=1 SV=3	46991	controllerType=0 controllerNumber=1 scan=13270	66.3275
05318:2	160	K.SVPAAPQLAKPGTTM[+15.995].L		M[+16]	742.888	2	1484.77	1484.78	0	-5.6	916	CRagged	251.7	146.05	146.05	7.22	2	>sp|Q3TUF7|YETS2_MOUSE YEATS domain-containing protein 2 OS=Mus musculus OX=10090 GN=Yeats2 PE=1 SV=2	49365	controllerType=0 controllerNumber=1 scan=11777	63.0135
07640:2	160	S.MPPLCPIGSHPK.V			638.827	2	1276.65	1276.65	0	-6	559	NRagged	160.31	26.38	26.38	1.53	2	>sp|Q3TUF7|YETS2_MOUSE YEATS domain-containing protein 2 OS=Mus musculus OX=10090 GN=Yeats2 PE=1 SV=2	49365	controllerType=0 controllerNumber=1 scan=14793	70.1368
11314:2	477	T.NYTSVLTNV.G			505.757	2	1010.51	1010.52	0	-8.3	419	Non	290.69	45.01	45.01	1.57	1	>sp|Q3TDD9|PPR21_MOUSE Protein phosphatase 1 regulatory subunit 21 OS=Mus musculus OX=10090 GN=Ppp1r21 PE=1 SV=2	52057	controllerType=0 controllerNumber=1 scan=21019	92.2563
05541:2	260	Q.TRPVLQPQPGSLN.S			703.887	2	1406.77	1406.78	0	-6	110	Non	177.99	86.92	86.92	4.02	2	>sp|Q3TC46|PATL1_MOUSE Protein PAT1 homolog 1 OS=Mus musculus OX=10090 GN=Patl1 PE=1 SV=2	50789	controllerType=0 controllerNumber=1 scan=12070	63.6938
10867:2	260	N.SSIWDGSEVLR.R			624.811	2	1248.62	1248.62	0	-5.4	123	NRagged	233.64	48.64	48.64	2.15	2	>sp|Q3TC46|PATL1_MOUSE Protein PAT1 homolog 1 OS=Mus musculus OX=10090 GN=Patl1 PE=1 SV=2	50789	controllerType=0 controllerNumber=1 scan=20228	89.2021
08323:2	317	T.HYELVTDTFGH.R			659.803	2	1318.6	1318.61	0	-6.2	544	Non	259.95	105.36	105.36	4.28	1	>sp|Q0VBL3|RBM15_MOUSE RNA-binding protein 15 OS=Mus musculus OX=10090 GN=Rbm15 PE=1 SV=1	36688	controllerType=0 controllerNumber=1 scan=15687	72.209
04450:2	379	E.SYLTVSSHP.N			495.745	2	990.484	990.489	0	-5.4	461	Non	283.45	73.69	73.69	3.12	1	>sp|Q07832|PLK1_MOUSE Serine/threonine-protein kinase PLK1 OS=Mus musculus OX=10090 GN=Plk1 PE=1 SV=2	51549	controllerType=0 controllerNumber=1 scan=10667	60.4819
09410:2	98	F.HDDSDEDLLHI.-			654.786	2	1308.56	1308.57	0	-4.4	2473	Non	390.47	204.25	204.25	7.11	2	>sp|Q07113|MPRI_MOUSE Cation-independent mannose-6-phosphate receptor OS=Mus musculus OX=10090 GN=Igf2r PE=1 SV=1	48326	controllerType=0 controllerNumber=1 scan=17923	81.655
10975:2	98	F.HDDS[+79.966]DEDLLHI.-		S[+80]	694.768	2	1388.53	1388.54	0	-5.5	2473	Non	218.69	43.09	43.09	2.28	2	>sp|Q07113|MPRI_MOUSE Cation-independent mannose-6-phosphate receptor OS=Mus musculus OX=10090 GN=Igf2r PE=1 SV=1	48326	controllerType=0 controllerNumber=1 scan=20416	89.8842
07665:2	286	G.SFSSSSALDRDLD.F			700.316	2	1399.62	1399.63	0	-6.3	387	Non	264.66	95.39	95.39	4.75	1	>sp|Q06831|SOX4_MOUSE Transcription factor SOX-4 OS=Mus musculus OX=10090 GN=Sox4 PE=1 SV=2	38318	controllerType=0 controllerNumber=1 scan=14830	70.2457
04117:2	314	K.TYVDPHTYEDPN.Q			725.806	2	1450.61	1450.61	0	-4.7	588	CRagged	233.49	85.99	85.99	4.35	1	>sp|Q03145|EPHA2_MOUSE Ephrin type-A receptor 2 OS=Mus musculus OX=10090 GN=Epha2 PE=1 SV=3	46216	controllerType=0 controllerNumber=1 scan=10250	59.5103
11445:2	444	L.SFVDTRTLL.L			526.29	2	1051.57	1051.58	0	-5.4	3	Non	297.43	31.42	31.42	2.12	2	>sp|Q01149|CO1A2_MOUSE Collagen alpha-2(I) chain OS=Mus musculus OX=10090 GN=Col1a2 PE=1 SV=2	39572	controllerType=0 controllerNumber=1 scan=21228	93.0095
05571:2	214	D.TLGSTVSQLQER.L			659.848	2	1318.69	1318.7	0	-5	75	NRagged	314.85	89.59	89.59	7.22	1	>sp|Q00623|APOA1_MOUSE Apolipoprotein A-I OS=Mus musculus OX=10090 GN=Apoa1 PE=1 SV=2	52379	controllerType=0 controllerNumber=1 scan=12111	63.795
09319:2	239	G.KYLGINSDGL.V			540.288	2	1079.57	1079.57	0	-3.6	115	Non	428.46	120.83	120.83	5.43	1	>sp|P97376|FRG1_MOUSE Protein FRG1 OS=Mus musculus OX=10090 GN=Frg1 PE=1 SV=2	49977	controllerType=0 controllerNumber=1 scan=17204	76.8487
01666:3	456	S.PYLPSAHRV.S			347.192	3	1039.56	1039.57	0	-7.7	365	Non	142.96	67.95	67.95	1.78	1	>sp|P83887|TBG1_MOUSE Tubulin gamma-1 chain OS=Mus musculus OX=10090 GN=Tubg1 PE=1 SV=1	39008	controllerType=0 controllerNumber=1 scan=7020	51.303
10483:2	368	R.HLYYTSPFYGN.Y			681.307	2	1361.61	1361.62	0	-6.8	384	CRagged	250.27	115.17	115.17	3.26	1	>sp|P81066|IRX2_MOUSE Iroquois-class homeodomain protein IRX-2 OS=Mus musculus OX=10090 GN=Irx2 PE=2 SV=2	42379	controllerType=0 controllerNumber=1 scan=19638	87.2723
10291:2	470	D.SYASVIKAL.E			476.276	2	951.544	951.551	0	-7.4	313	Non	292.3	66.36	66.36	1.65	1	>sp|P70698|PYRG1_MOUSE CTP synthase 1 OS=Mus musculus OX=10090 GN=Ctps1 PE=1 SV=2	53350	controllerType=0 controllerNumber=1 scan=19349	86.3777
03374:2	30	Q.SSYGGPASQQLS.G			591.27	2	1181.53	1181.54	0	-8.7	406	Non	468.53	225.67	225.67	8.62	6	>sp|P70333|HNRH2_MOUSE Heterogeneous nuclear ribonucleoprotein H2 OS=Mus musculus OX=10090 GN=Hnrnph2 PE=1 SV=1	43040	controllerType=0 controllerNumber=1 scan=9310	57.2623
03074:2	30	S.SYGGPASQQLS.G			547.756	2	1094.51	1094.51	0	-5.7	407	Non	273.31	91.26	91.26	6.13	6	>sp|P70333|HNRH2_MOUSE Heterogeneous nuclear ribonucleoprotein H2 OS=Mus musculus OX=10090 GN=Hnrnph2 PE=1 SV=1	43040	controllerType=0 controllerNumber=1 scan=8931	56.3528
07849:2	30	M.SGYDQVLQENSSD.Y			721.304	2	1441.6	1441.61	0	-4.7	431	Non	226.3	103.94	103.94	5.74	6	>sp|P70333|HNRH2_MOUSE Heterogeneous nuclear ribonucleoprotein H2 OS=Mus musculus OX=10090 GN=Hnrnph2 PE=1 SV=1	43040	controllerType=0 controllerNumber=1 scan=15073	70.8012
03638:2	30	Q.SSYGGPASQQLSGG.Y			648.292	2	1295.58	1295.59	0	-6.7	406	Non	179.78	4.91	4.91	2.15	6	>sp|P70333|HNRH2_MOUSE Heterogeneous nuclear ribonucleoprotein H2 OS=Mus musculus OX=10090 GN=Hnrnph2 PE=1 SV=1	43040	controllerType=0 controllerNumber=1 scan=9641	58.0562
05333:2	30	Q.SSYGGPASQQL.S			547.756	2	1094.5	1094.51	0	-6.1	406	Non	210.25	24.25	24.25	2.13	6	>sp|P70333|HNRH2_MOUSE Heterogeneous nuclear ribonucleoprotein H2 OS=Mus musculus OX=10090 GN=Hnrnph2 PE=1 SV=1	43040	controllerType=0 controllerNumber=1 scan=11795	63.0486
08999:2	452	E.VLEETVQTMDTS.-			676.813	2	1352.62	1352.62	0	-4.6	266	Non	242.26	39.34	39.34	1.85	1	>sp|P70195|PSB7_MOUSE Proteasome subunit beta type-7 OS=Mus musculus OX=10090 GN=Psmb7 PE=1 SV=1	52162	controllerType=0 controllerNumber=1 scan=16588	74.3779
08530:2	51	I.TYLPAGQSV.L			468.242	2	935.477	935.483	0	-6.3	258	Non	363.47	123.22	123.22	7.72	2	>sp|P67778|PHB_MOUSE Prohibitin OS=Mus musculus OX=10090 GN=Phb PE=1 SV=1	50987	controllerType=0 controllerNumber=1 scan=15959	72.8516
11695:2	51	I.TYLPAGQSVL.L			524.783	2	1048.56	1048.57	0	-7.8	258	Non	347.52	103.62	103.62	6.87	2	>sp|P67778|PHB_MOUSE Prohibitin OS=Mus musculus OX=10090 GN=Phb PE=1 SV=1	50987	controllerType=0 controllerNumber=1 scan=21693	94.9931
11969:2	48	K.SYELPDGQVIT.I			611.3	2	1221.59	1221.6	0	-5.9	239	CRagged	377.97	167.88	167.88	8.04	5	>sp|P63260|ACTG_MOUSE Actin, cytoplasmic 2 OS=Mus musculus OX=10090 GN=Actg1 PE=1 SV=1	52582	controllerType=0 controllerNumber=1 scan=22184	97.0411
10638:2	48	N.TVLSGGTTM[+15.995]YPGIAD.R		M[+16]	749.854	2	1498.7	1498.71	0	-5.7	297	Non	224.44	65.95	65.95	5.06	5	>sp|P63260|ACTG_MOUSE Actin, cytoplasmic 2 OS=Mus musculus OX=10090 GN=Actg1 PE=1 SV=1	52582	controllerType=0 controllerNumber=1 scan=19860	87.9109
11369:2	48	E.GYALPHAIL.R			477.771	2	954.534	954.541	0	-7.3	168	Non	254.07	63.69	63.69	3.83	5	>sp|P63260|ACTG_MOUSE Actin, cytoplasmic 2 OS=Mus musculus OX=10090 GN=Actg1 PE=1 SV=1	52582	controllerType=0 controllerNumber=1 scan=21116	92.6638
07540:2	48	D.SGDGVTHTVPIYE.G			687.826	2	1374.65	1374.65	0	-5.9	155	Non	151.44	23.75	23.75	2.2	5	>sp|P63260|ACTG_MOUSE Actin, cytoplasmic 2 OS=Mus musculus OX=10090 GN=Actg1 PE=1 SV=1	52582	controllerType=0 controllerNumber=1 scan=14671	69.8745
06276:2	48	E.HPVLLTEA.P			440.248	2	879.489	879.493	0	-5.2	101	Non	239.32	13.61	13.61	2.17	5	>sp|P63260|ACTG_MOUSE Actin, cytoplasmic 2 OS=Mus musculus OX=10090 GN=Actg1 PE=1 SV=1	52582	controllerType=0 controllerNumber=1 scan=12976	65.6862
09526:2	72	T.TSYQQISGVQQI.Q			676.343	2	1351.68	1351.69	0	-4.2	193	Non	270.08	72.65	72.65	6.62	4	>sp|P63139|NFYB_MOUSE Nuclear transcription factor Y subunit beta OS=Mus musculus OX=10090 GN=Nfyb PE=1 SV=1	53250	controllerType=0 controllerNumber=1 scan=18205	82.9563
08611:2	72	T.SYQQISGVQQIQ.F			689.846	2	1378.69	1378.7	0	-7.5	194	Non	284.77	61.7	61.7	6.09	4	>sp|P63139|NFYB_MOUSE Nuclear transcription factor Y subunit beta OS=Mus musculus OX=10090 GN=Nfyb PE=1 SV=1	53250	controllerType=0 controllerNumber=1 scan=16060	73.0763
04527:2	72	T.TSYQQISGVQQ.I			619.801	2	1238.6	1238.6	0	-4.6	193	Non	165.92	46.53	46.53	2.86	4	>sp|P63139|NFYB_MOUSE Nuclear transcription factor Y subunit beta OS=Mus musculus OX=10090 GN=Nfyb PE=1 SV=1	53250	controllerType=0 controllerNumber=1 scan=10762	60.6917
05124:2	72	T.TSYQQISGVQ.Q			555.772	2	1110.54	1110.54	0	-5.4	193	Non	237.95	28.14	28.14	2.24	4	>sp|P63139|NFYB_MOUSE Nuclear transcription factor Y subunit beta OS=Mus musculus OX=10090 GN=Nfyb PE=1 SV=1	53250	controllerType=0 controllerNumber=1 scan=11527	62.4391
11572:2	142	Q.SIVPALEIANAH.R			617.838	2	1234.67	1234.68	0	-7.8	256	Non	353.21	101.42	101.42	8.15	1	>sp|P63038|CH60_MOUSE 60 kDa heat shock protein, mitochondrial OS=Mus musculus OX=10090 GN=Hspd1 PE=1 SV=1	40295	controllerType=0 controllerNumber=1 scan=21445	93.8458
09875:2	132	G.SELIQKYLGD.G			583.305	2	1165.6	1165.61	0	-5.4	253	Non	333.92	80.46	80.46	7.5	4	>sp|P62192|PRS4_MOUSE 26S proteasome regulatory subunit 4 OS=Mus musculus OX=10090 GN=Psmc1 PE=1 SV=1	52222	controllerType=0 controllerNumber=1 scan=18752	84.654
09437:2	132	T.SATFLRVVG.S			475.275	2	949.542	949.547	0	-4.7	244	Non	284.06	33.39	33.39	2.99	4	>sp|P62192|PRS4_MOUSE 26S proteasome regulatory subunit 4 OS=Mus musculus OX=10090 GN=Psmc1 PE=1 SV=1	52222	controllerType=0 controllerNumber=1 scan=18012	82.1377
03010:2	132	G.SELIQKY.L			440.74	2	880.472	880.477	0	-6	253	Non	264.1	9.42	9.42	2.22	4	>sp|P62192|PRS4_MOUSE 26S proteasome regulatory subunit 4 OS=Mus musculus OX=10090 GN=Psmc1 PE=1 SV=1	52222	controllerType=0 controllerNumber=1 scan=8854	56.1838
06042:2	344	S.SYLDVKQRL.K			561.316	2	1121.62	1121.63	0	-5.7	245	Non	296.08	82.72	82.72	3.8	1	>sp|P61222|ABCE1_MOUSE ATP-binding cassette sub-family E member 1 OS=Mus musculus OX=10090 GN=Abce1 PE=1 SV=1	52280	controllerType=0 controllerNumber=1 scan=12684	65.0327
09496:2	104	D.TPIVIQPASATETT.Q			714.879	2	1428.75	1428.76	0	-4.6	169	Non	354.47	195.61	195.61	9.31	1	>sp|P60904|DNJC5_MOUSE DnaJ homolog subfamily C member 5 OS=Mus musculus OX=10090 GN=Dnajc5 PE=1 SV=1	46536	controllerType=0 controllerNumber=1 scan=18150	82.7583
08810:2	501	N.KYIDQGVAEL.V			568.3	2	1135.59	1135.6	0	-5.2	285	Non	276.31	34.27	34.27	1.36	2	>sp|P60122|RUVB1_MOUSE RuvB-like 1 OS=Mus musculus OX=10090 GN=Ruvbl1 PE=1 SV=1	38423	controllerType=0 controllerNumber=1 scan=16336	73.7668
11729:2	34	D.SGAPIKIPVGPETLG.R			718.409	2	1435.81	1435.82	0	-3.7	128	Non	382.83	246.83	246.83	8.91	4	>sp|P56480|ATPB_MOUSE ATP synthase subunit beta, mitochondrial OS=Mus musculus OX=10090 GN=Atp5f1b PE=1 SV=2	46788	controllerType=0 controllerNumber=1 scan=21764	95.3065
06607:2	34	G.KLVPLKETI.K			520.836	2	1040.67	1040.67	0	-5.7	480	Non	322.62	77.51	77.51	6.69	4	>sp|P56480|ATPB_MOUSE ATP synthase subunit beta, mitochondrial OS=Mus musculus OX=10090 GN=Atp5f1b PE=1 SV=2	46788	controllerType=0 controllerNumber=1 scan=13434	66.8757
11733:2	34	F.TQAGSEVSALLG.R			566.793	2	1132.58	1132.58	0	-5.7	312	Non	236.88	41.41	41.41	4.72	4	>sp|P56480|ATPB_MOUSE ATP synthase subunit beta, mitochondrial OS=Mus musculus OX=10090 GN=Atp5f1b PE=1 SV=2	46788	controllerType=0 controllerNumber=1 scan=21771	95.3369
04896:2	34	R.TIAM[+15.995]DGTEGLVR.G		M[+16]	639.818	2	1278.63	1278.64	0	-5.9	110	Specific	183.97	9.3	9.3	1.9	4	>sp|P56480|ATPB_MOUSE ATP synthase subunit beta, mitochondrial OS=Mus musculus OX=10090 GN=Atp5f1b PE=1 SV=2	46788	controllerType=0 controllerNumber=1 scan=11241	61.8159
10008:2	405	L.RYLQTLTTI.A			554.819	2	1108.63	1108.64	0	-5.5	251	Non	318.17	36.85	36.85	2.63	1	>sp|P54116|STOM_MOUSE Erythrocyte band 7 integral membrane protein OS=Mus musculus OX=10090 GN=Stom PE=1 SV=3	37141	controllerType=0 controllerNumber=1 scan=18941	85.1756
00146:2	413	I.TYQPAAGTKM[+15.995].C		M[+16]	542.257	2	1083.51	1083.51	0	-7	8	Non	127	73.18	73.18	1.99	1	>sp|P53351|PLK2_MOUSE Serine/threonine-protein kinase PLK2 OS=Mus musculus OX=10090 GN=Plk2 PE=1 SV=1	51550	controllerType=0 controllerNumber=1 scan=3568	32.6816
11934:2	395	M.TTPSLTPFTPS.L			574.791	2	1148.58	1148.58	0	-7.3	224	Non	246.21	44.95	44.95	2.79	1	>sp|P48755|FOSL1_MOUSE Fos-related antigen 1 OS=Mus musculus OX=10090 GN=Fosl1 PE=2 SV=2	50018	controllerType=0 controllerNumber=1 scan=22118	96.7458
05859:2	5	G.SGGGSFGDNLVTR.S			633.804	2	1266.6	1266.61	0	-4.8	633	NRagged	621.39	350.06	350.06	10.86	10	>sp|P48678|LMNA_MOUSE Prelamin-A/C OS=Mus musculus OX=10090 GN=Lmna PE=1 SV=2	47447	controllerType=0 controllerNumber=1 scan=12461	64.5498
09346:2	5	G.SFGDNLVTRSY.L			629.804	2	1258.6	1258.61	0	-4.7	637	Non	471.66	257.5	257.5	9.02	10	>sp|P48678|LMNA_MOUSE Prelamin-A/C OS=Mus musculus OX=10090 GN=Lmna PE=1 SV=2	47447	controllerType=0 controllerNumber=1 scan=17580	79.5124
05762:2	5	G.GSGGGSFGDNLVTR.S			662.314	2	1323.62	1323.63	0	-5.6	632	NRagged	418.3	213.31	213.31	8.85	10	>sp|P48678|LMNA_MOUSE Prelamin-A/C OS=Mus musculus OX=10090 GN=Lmna PE=1 SV=2	47447	controllerType=0 controllerNumber=1 scan=12340	64.2834
09873:2	5	R.SVGGSGGGSFGDNLVT.R			705.825	2	1410.64	1410.65	0	-5.2	629	CRagged	360.05	159.51	159.51	8.56	10	>sp|P48678|LMNA_MOUSE Prelamin-A/C OS=Mus musculus OX=10090 GN=Lmna PE=1 SV=2	47447	controllerType=0 controllerNumber=1 scan=18750	84.6486
03595:2	5	R.SFRSVGGSGGGSFGDN.L			744.324	2	1487.64	1487.65	0	-6.2	626	CRagged	269.44	148.73	148.73	7.85	10	>sp|P48678|LMNA_MOUSE Prelamin-A/C OS=Mus musculus OX=10090 GN=Lmna PE=1 SV=2	47447	controllerType=0 controllerNumber=1 scan=9587	57.9277
06891:2	5	S.VGGSGGGSFGDNLVTR.S			740.359	2	1479.71	1479.72	0	-4.8	630	NRagged	294.99	183.66	183.66	7.8	10	>sp|P48678|LMNA_MOUSE Prelamin-A/C OS=Mus musculus OX=10090 GN=Lmna PE=1 SV=2	47447	controllerType=0 controllerNumber=1 scan=13824	67.9
05940:2	5	S.GGGSFGDNLVTR.S			590.288	2	1179.57	1179.58	0	-5.3	634	NRagged	351.68	89.62	89.62	7.53	10	>sp|P48678|LMNA_MOUSE Prelamin-A/C OS=Mus musculus OX=10090 GN=Lmna PE=1 SV=2	47447	controllerType=0 controllerNumber=1 scan=12556	64.7413
06406:2	5	G.SFGDNLVTR.S			504.757	2	1008.51	1008.51	0	-5	637	NRagged	333.74	79.01	79.01	5.96	10	>sp|P48678|LMNA_MOUSE Prelamin-A/C OS=Mus musculus OX=10090 GN=Lmna PE=1 SV=2	47447	controllerType=0 controllerNumber=1 scan=13144	66.0485
10774:2	5	R.SVGGSGGGSFGDNLV.T			655.299	2	1309.59	1309.6	0	-7.7	629	CRagged	199.15	7.92	7.92	1.9	10	>sp|P48678|LMNA_MOUSE Prelamin-A/C OS=Mus musculus OX=10090 GN=Lmna PE=1 SV=2	47447	controllerType=0 controllerNumber=1 scan=20076	88.6865
06411:2	81	A.TQLTGPVM[+15.995]PIR.N		M[+16]	614.836	2	1228.67	1228.67	0	-5.3	148	NRagged	412.92	193.15	193.15	8.04	2	>sp|P47963|RL13_MOUSE 60S ribosomal protein L13 OS=Mus musculus OX=10090 GN=Rpl13 PE=1 SV=3	48696	controllerType=0 controllerNumber=1 scan=13150	66.0621
05454:2	81	A.TQLTGPVM[+15.995]PIRN.V		M[+16]	671.858	2	1342.71	1342.71	0	-4.7	148	Non	181.84	53.45	53.45	3.38	2	>sp|P47963|RL13_MOUSE 60S ribosomal protein L13 OS=Mus musculus OX=10090 GN=Rpl13 PE=1 SV=3	48696	controllerType=0 controllerNumber=1 scan=11959	63.4441
08669:2	59	R.SQFSLTNGM[+15.995]YPH.K		M[+16]	699.308	2	1397.61	1397.62	0	-4.2	281	CRagged	364.38	148.82	148.82	6.76	4	>sp|P47911|RL6_MOUSE 60S ribosomal protein L6 OS=Mus musculus OX=10090 GN=Rpl6 PE=1 SV=3	48567	controllerType=0 controllerNumber=1 scan=16135	73.2496
08103:2	59	V.TGPLVINRV.P			484.796	2	968.584	968.589	0	-5	184	Non	330.23	57.86	57.86	6.09	4	>sp|P47911|RL6_MOUSE 60S ribosomal protein L6 OS=Mus musculus OX=10090 GN=Rpl6 PE=1 SV=3	48567	controllerType=0 controllerNumber=1 scan=15385	71.4605
03342:2	59	P.TEDVPRKLLS.H			579.326	2	1157.64	1157.65	0	-6.7	126	Non	289.01	28.62	28.62	3.06	4	>sp|P47911|RL6_MOUSE 60S ribosomal protein L6 OS=Mus musculus OX=10090 GN=Rpl6 PE=1 SV=3	48567	controllerType=0 controllerNumber=1 scan=9269	57.1577
09420:2	59	L.AT[+79.966]VTKTVGGDK.N		T[+80]	578.782	2	1156.56	1156.56	0	-3.6	98	NRagged	199.04	62	62	1.9	4	>sp|P47911|RL6_MOUSE 60S ribosomal protein L6 OS=Mus musculus OX=10090 GN=Rpl6 PE=1 SV=3	48567	controllerType=0 controllerNumber=1 scan=17963	81.8907
10283:2	330	R.KILDPNSGEPAPVL.S			725.397	2	1449.79	1449.79	0	-5.3	415	CRagged	221.51	96.65	96.65	3.97	2	>sp|P46061|RAGP1_MOUSE Ran GTPase-activating protein 1 OS=Mus musculus OX=10090 GN=Rangap1 PE=1 SV=2	37349	controllerType=0 controllerNumber=1 scan=19338	86.3485
08954:2	332	E.AFQKTLTDL.K			518.785	2	1036.56	1036.57	0	-5	92	Non	391.37	15.62	15.62	4.1	1	>sp|P45377|ALD2_MOUSE Aldose reductase-related protein 2 OS=Mus musculus OX=10090 GN=Akr1b8 PE=1 SV=2	52487	controllerType=0 controllerNumber=1 scan=16522	74.1985
06369:2	140	E.TAPAAPAAPAPVE.K			581.807	2	1162.61	1162.61	0	-3.6	4	Non	336.38	143.99	143.99	8.1	2	>sp|P43277|H13_MOUSE Histone H1.3 OS=Mus musculus OX=10090 GN=Hist1h1d PE=1 SV=2	42161	controllerType=0 controllerNumber=1 scan=13097	65.9527
07192:2	140	M.SETAPAAPAAPAPVE.K			689.848	2	1378.69	1378.68	0	3.6	2	Non	184.04	9.58	9.58	1.59	2	>sp|P43277|H13_MOUSE Histone H1.3 OS=Mus musculus OX=10090 GN=Hist1h1d PE=1 SV=2	42161	controllerType=0 controllerNumber=1 scan=14204	68.7567
05637:2	118	M.SETAPAETAAPAPVE.K			720.843	2	1440.68	1440.69	0	-4.6	2	Non	373.13	210.65	210.65	8.81	1	>sp|P43276|H15_MOUSE Histone H1.5 OS=Mus musculus OX=10090 GN=Hist1h1b PE=1 SV=2	42207	controllerType=0 controllerNumber=1 scan=12194	63.988
08815:2	19	K.TSGPPVSELITK.A			614.839	2	1228.67	1228.68	0	-6.2	35	Specific	387.71	202.46	202.46	7.65	7	>sp|P43274|H14_MOUSE Histone H1.4 OS=Mus musculus OX=10090 GN=Hist1h1e PE=1 SV=2	42162	controllerType=0 controllerNumber=1 scan=16343	73.7863
09413:2	19	T.SGPPVSELITKA.V			599.835	2	1198.66	1198.67	0	-3.8	36	Non	323.77	181.5	181.5	7.61	7	>sp|P43274|H14_MOUSE Histone H1.4 OS=Mus musculus OX=10090 GN=Hist1h1e PE=1 SV=2	42162	controllerType=0 controllerNumber=1 scan=17940	81.7658
09580:2	19	K.TSGPPVSELITKA.V			650.358	2	1299.71	1299.72	0	-5.8	35	CRagged	300.12	99.62	99.62	7.56	7	>sp|P43274|H14_MOUSE Histone H1.4 OS=Mus musculus OX=10090 GN=Hist1h1e PE=1 SV=2	42162	controllerType=0 controllerNumber=1 scan=18291	83.2191
06896:2	19	K.SLVSKGTLV.Q			452.277	2	903.546	903.551	0	-5.4	86	CRagged	313.07	69.73	69.73	5.8	7	>sp|P43274|H14_MOUSE Histone H1.4 OS=Mus musculus OX=10090 GN=Hist1h1e PE=1 SV=2	42162	controllerType=0 controllerNumber=1 scan=13832	67.9193
04922:2	19	K.SLVSKGTLVQ.T			516.305	2	1031.6	1031.61	0	-5.8	86	CRagged	288.03	11.23	11.23	3.16	7	>sp|P43274|H14_MOUSE Histone H1.4 OS=Mus musculus OX=10090 GN=Hist1h1e PE=1 SV=2	42162	controllerType=0 controllerNumber=1 scan=11273	61.8849
05980:2	19	K.SLVSKGTLVQT.K			566.827	2	1132.65	1132.66	0	-8.4	86	CRagged	173.3	17.08	17.08	1.92	7	>sp|P43274|H14_MOUSE Histone H1.4 OS=Mus musculus OX=10090 GN=Hist1h1e PE=1 SV=2	42162	controllerType=0 controllerNumber=1 scan=12606	64.8569
08930:2	397	N.LYQPTGGQL.L			488.756	2	976.505	976.51	0	-5.2	518	Non	341.54	27.44	27.44	2.75	1	>sp|P36371|TAP2_MOUSE Antigen peptide transporter 2 OS=Mus musculus OX=10090 GN=Tap2 PE=1 SV=1	38509	controllerType=0 controllerNumber=1 scan=16488	74.112
09902:2	323	G.ATSALAPKIGPLG.L			598.352	2	1195.7	1195.7	0	-6	24	Non	206.49	76.25	76.25	4.21	1	>sp|P35979|RL12_MOUSE 60S ribosomal protein L12 OS=Mus musculus OX=10090 GN=Rpl12 PE=1 SV=2	48721	controllerType=0 controllerNumber=1 scan=18790	84.7588
11627:2	137	A.TADPEPPLEELG.Y			634.303	2	1267.6	1267.61	0	-4.5	354	Non	322.33	100.59	100.59	8.31	2	>sp|P35486|ODPA_MOUSE Pyruvate dehydrogenase E1 component subunit alpha, somatic form, mitochondrial OS=Mus musculus OX=10090 GN=Pdha1 PE=1 SV=1	51845	controllerType=0 controllerNumber=1 scan=21551	94.3266
11087:2	409	N.TNVPRASVPEGFL.S			693.868	2	1386.73	1386.74	0	-6	8	Non	186.24	49.39	49.39	2.6	1	>sp|P34884|MIF_MOUSE Macrophage migration inhibitory factor OS=Mus musculus OX=10090 GN=Mif PE=1 SV=2	47153	controllerType=0 controllerNumber=1 scan=20604	90.5671
09222:2	151	L.KYIEGVSDF.N			529.261	2	1057.51	1057.52	0	-5.4	238	Non	478.01	149.69	149.69	7.91	2	>sp|P28575|IPP_MOUSE Actin-binding protein IPP OS=Mus musculus OX=10090 GN=Ipp PE=2 SV=3	42407	controllerType=0 controllerNumber=1 scan=16895	75.1661
05195:2	151	K.FCSFLQTSK.V			530.756	2	1060.51	1060.51	0	-7	271	Specific	210.99	3.63	3.63	1.42	2	>sp|P28575|IPP_MOUSE Actin-binding protein IPP OS=Mus musculus OX=10090 GN=Ipp PE=2 SV=3	42407	controllerType=0 controllerNumber=1 scan=11618	62.6394
04423:2	269	A.SYGTAVTHI.R			474.74	2	948.473	948.479	0	-5.7	156	Non	314.85	83.69	83.69	5	2	>sp|P27808|MGAT1_MOUSE Alpha-1,3-mannosyl-glycoprotein 2-beta-N-acetylglucosaminyltransferase OS=Mus musculus OX=10090 GN=Mgat1 PE=1 SV=1	41738	controllerType=0 controllerNumber=1 scan=10635	60.4147
02207:2	476	C.SPEAPPAPTAE.-			533.751	2	1066.49	1066.51	0	-9.4	299	Non	167.92	75.69	75.69	1.57	1	>sp|P26645|MARCS_MOUSE Myristoylated alanine-rich C-kinase substrate OS=Mus musculus OX=10090 GN=Marcks PE=1 SV=2	47322	controllerType=0 controllerNumber=1 scan=7808	53.6219
11608:2	128	K.HGGTIPVVPTAEF.Q			662.844	2	1324.68	1324.69	0	-6.2	481	CRagged	309.81	149.57	149.57	7.89	2	>sp|P26443|DHE3_MOUSE Glutamate dehydrogenase 1, mitochondrial OS=Mus musculus OX=10090 GN=Glud1 PE=1 SV=1	46419	controllerType=0 controllerNumber=1 scan=21512	94.1514
07469:2	128	K.HGGTIPVVPTAE.F			589.31	2	1177.61	1177.62	0	-6.6	481	CRagged	267.84	27.32	27.32	2.93	2	>sp|P26443|DHE3_MOUSE Glutamate dehydrogenase 1, mitochondrial OS=Mus musculus OX=10090 GN=Glud1 PE=1 SV=1	46419	controllerType=0 controllerNumber=1 scan=14581	69.68
09499:2	158	S.GYLSSERLI.P			519.283	2	1037.56	1037.56	0	-4.7	145	Non	384.45	84.76	84.76	7.91	1	>sp|P26040|EZRI_MOUSE Ezrin OS=Mus musculus OX=10090 GN=Ezr PE=1 SV=3	45402	controllerType=0 controllerNumber=1 scan=18155	82.7686
11129:2	322	Y.RLIVSVNDL.R			514.806	2	1028.6	1028.61	0	-4.9	46	Non	265.61	74.47	74.47	4.23	1	>sp|P25206|MCM3_MOUSE DNA replication licensing factor MCM3 OS=Mus musculus OX=10090 GN=Mcm3 PE=1 SV=2	47717	controllerType=0 controllerNumber=1 scan=20678	90.87
07505:2	455	K.TEKSLANLNLN.N			608.827	2	1216.65	1216.65	0	-5.7	18	CRagged	270.1	33.53	33.53	1.81	1	>sp|P23949|TISD_MOUSE mRNA decay activator protein ZFP36L2 OS=Mus musculus OX=10090 GN=Zfp36l2 PE=1 SV=2	44144	controllerType=0 controllerNumber=1 scan=14626	69.7771
01520:2	109	T.TPTPM[+15.995]HPPSGLS.F		M[+16]	619.293	2	1237.58	1237.59	0	-8	418	Non	367.52	207.11	207.11	8.57	1	>sp|P23772|GATA3_MOUSE Trans-acting T-cell-specific transcription factor GATA-3 OS=Mus musculus OX=10090 GN=Gata3 PE=1 SV=1	45165	controllerType=0 controllerNumber=1 scan=6828	50.7985
08734:2	334	N.YYNKVSTVF.W			560.784	2	1120.56	1120.57	0	-5.2	275	Non	284.69	49.53	49.53	3.79	2	>sp|P23116|EIF3A_MOUSE Eukaryotic translation initiation factor 3 subunit A OS=Mus musculus OX=10090 GN=Eif3a PE=1 SV=5	46746	controllerType=0 controllerNumber=1 scan=16225	73.4691
10670:2	263	K.YYLTDVDRI.A			579.293	2	1157.58	1157.58	0	-4.9	159	CRagged	332.26	79.93	79.93	5.1	1	>sp|P21278|GNA11_MOUSE Guanine nucleotide-binding protein subunit alpha-11 OS=Mus musculus OX=10090 GN=Gna11 PE=1 SV=1	42514	controllerType=0 controllerNumber=1 scan=19906	88.0422
05012:2	3	S.YVTTSTRTYSLG.S			674.837	2	1348.67	1348.67	0	-5.5	30	Non	297.73	102.13	102.13	8.26	26	>sp|P20152|VIME_MOUSE Vimentin OS=Mus musculus OX=10090 GN=Vim PE=1 SV=3	44044	controllerType=0 controllerNumber=1 scan=11385	62.1372
08500:2	3	R.TYSLGSALRPSTS.R			670.343	2	1339.68	1339.69	0	-4.5	37	CRagged	362.33	158.6	158.6	8.1	26	>sp|P20152|VIME_MOUSE Vimentin OS=Mus musculus OX=10090 GN=Vim PE=1 SV=3	44044	controllerType=0 controllerNumber=1 scan=15920	72.7656
08064:2	3	A.NYQDTIGRL.Q			540.275	2	1079.54	1079.55	0	-5.4	357	Non	400.75	129.11	129.11	8.09	26	>sp|P20152|VIME_MOUSE Vimentin OS=Mus musculus OX=10090 GN=Vim PE=1 SV=3	44044	controllerType=0 controllerNumber=1 scan=15336	71.3569
02111:2	3	S.SSPGGAYVTRSSAV.R			669.831	2	1338.65	1338.66	0	-8	55	Non	293.4	161.7	161.7	8.01	26	>sp|P20152|VIME_MOUSE Vimentin OS=Mus musculus OX=10090 GN=Vim PE=1 SV=3	44044	controllerType=0 controllerNumber=1 scan=7678	53.2637
06635:2	3	R.SYVTTSTRTYSLG.S			718.353	2	1435.7	1435.71	0	-5	29	CRagged	306.71	151.61	151.61	7.98	26	>sp|P20152|VIME_MOUSE Vimentin OS=Mus musculus OX=10090 GN=Vim PE=1 SV=3	44044	controllerType=0 controllerNumber=1 scan=13466	66.9374
11136:2	3	R.SSVPGVRLLQDSVD.F			736.388	2	1471.77	1471.78	0	-4.5	72	CRagged	296.11	178.81	178.81	7.88	26	>sp|P20152|VIME_MOUSE Vimentin OS=Mus musculus OX=10090 GN=Vim PE=1 SV=3	44044	controllerType=0 controllerNumber=1 scan=20687	90.8887
09364:2	3	R.SSVPGVRLLQ.D			528.311	2	1055.62	1055.62	0	-5.3	72	CRagged	389.81	127.2	127.2	7.43	26	>sp|P20152|VIME_MOUSE Vimentin OS=Mus musculus OX=10090 GN=Vim PE=1 SV=3	44044	controllerType=0 controllerNumber=1 scan=17682	80.1607
06816:2	3	F.SSLNLRETNLE.S			638.327	2	1275.65	1275.65	0	-5.2	419	Non	308.09	83.38	83.38	7.21	26	>sp|P20152|VIME_MOUSE Vimentin OS=Mus musculus OX=10090 GN=Vim PE=1 SV=3	44044	controllerType=0 controllerNumber=1 scan=13734	67.7063
06218:2	3	S.YVTTSTRTYSL.G			646.327	2	1291.65	1291.65	0	-5.6	30	Non	297.67	131.87	131.87	7.17	26	>sp|P20152|VIME_MOUSE Vimentin OS=Mus musculus OX=10090 GN=Vim PE=1 SV=3	44044	controllerType=0 controllerNumber=1 scan=12908	65.5415
05904:2	3	R.SLYSSSPGGAYVTR.S			722.853	2	1444.7	1444.71	0	-5.6	51	Specific	271.23	179.87	179.87	6.8	26	>sp|P20152|VIME_MOUSE Vimentin OS=Mus musculus OX=10090 GN=Vim PE=1 SV=3	44044	controllerType=0 controllerNumber=1 scan=12513	64.6542
07601:2	3	R.SYVTTSTRTYSL.G			689.845	2	1378.68	1378.68	0	-2.1	29	CRagged	306.26	109.86	109.86	6.58	26	>sp|P20152|VIME_MOUSE Vimentin OS=Mus musculus OX=10090 GN=Vim PE=1 SV=3	44044	controllerType=0 controllerNumber=1 scan=14746	70.0401
03220:2	3	Y.SLGSALRPSTS.R			538.286	2	1075.56	1075.57	0	-8.7	39	Non	319.49	75.39	75.39	6.42	26	>sp|P20152|VIME_MOUSE Vimentin OS=Mus musculus OX=10090 GN=Vim PE=1 SV=3	44044	controllerType=0 controllerNumber=1 scan=9118	56.8203
01608:2	3	R.SYVTTSTRTY.S			589.783	2	1178.56	1178.57	0	-8.9	29	CRagged	340.77	162.92	162.92	6.21	26	>sp|P20152|VIME_MOUSE Vimentin OS=Mus musculus OX=10090 GN=Vim PE=1 SV=3	44044	controllerType=0 controllerNumber=1 scan=6947	51.1219
02690:2	3	E.SLPLVDTHSK.R			548.8	2	1096.59	1096.6	0	-5.7	430	NRagged	292.83	82.64	82.64	5.19	26	>sp|P20152|VIME_MOUSE Vimentin OS=Mus musculus OX=10090 GN=Vim PE=1 SV=3	44044	controllerType=0 controllerNumber=1 scan=8430	55.138
02304:3	3	G.SALRPSTSRSLY.S			446.574	3	1337.71	1337.72	0	-7	42	Non	250.24	21.35	21.35	4.94	26	>sp|P20152|VIME_MOUSE Vimentin OS=Mus musculus OX=10090 GN=Vim PE=1 SV=3	44044	controllerType=0 controllerNumber=1 scan=7935	53.9541
00835:2	3	K.TVETRDGQVINE.T			680.834	2	1360.66	1360.67	0	-6.6	446	CRagged	193.26	80.25	80.25	4.63	26	>sp|P20152|VIME_MOUSE Vimentin OS=Mus musculus OX=10090 GN=Vim PE=1 SV=3	44044	controllerType=0 controllerNumber=1 scan=5755	46.9857
01117:2	3	R.SYVTTSTRTYS.L			633.3	2	1265.59	1265.6	0	-6.7	29	CRagged	160.88	81.25	81.25	3.52	26	>sp|P20152|VIME_MOUSE Vimentin OS=Mus musculus OX=10090 GN=Vim PE=1 SV=3	44044	controllerType=0 controllerNumber=1 scan=6212	48.6745
05557:2	3	R.TLLIKTVETRDG.Q			673.385	2	1345.76	1345.77	0	-4.8	441	CRagged	279.1	16.97	16.97	3.18	26	>sp|P20152|VIME_MOUSE Vimentin OS=Mus musculus OX=10090 GN=Vim PE=1 SV=3	44044	controllerType=0 controllerNumber=1 scan=12090	63.7383
00351:2	3	Y.SSSPGGAYVTRSS.A			628.295	2	1255.58	1255.59	0	-6.2	54	Non	150.32	66.71	66.71	3.13	26	>sp|P20152|VIME_MOUSE Vimentin OS=Mus musculus OX=10090 GN=Vim PE=1 SV=3	44044	controllerType=0 controllerNumber=1 scan=4673	41.2615
05168:3	3	E.SLPLVDTHSKRTL.L			489.613	3	1466.83	1466.83	0	-4.9	430	Non	149.95	59.19	59.19	2.2	26	>sp|P20152|VIME_MOUSE Vimentin OS=Mus musculus OX=10090 GN=Vim PE=1 SV=3	44044	controllerType=0 controllerNumber=1 scan=11580	62.543
01086:2	3	K.TVETRDGQVINET.S			731.357	2	1461.71	1461.72	0	-7.8	446	CRagged	128.23	44.32	44.32	2.18	26	>sp|P20152|VIME_MOUSE Vimentin OS=Mus musculus OX=10090 GN=Vim PE=1 SV=3	44044	controllerType=0 controllerNumber=1 scan=6161	48.4824
06568:2	3	R.SSVPGVRL.L			407.74	2	814.474	814.478	0	-5.4	72	CRagged	302.36	3.65	3.65	2.14	26	>sp|P20152|VIME_MOUSE Vimentin OS=Mus musculus OX=10090 GN=Vim PE=1 SV=3	44044	controllerType=0 controllerNumber=1 scan=13370	66.6687
09814:2	3	R.SSVPGVRLL.Q			464.282	2	927.558	927.562	0	-5.1	72	CRagged	223.53	40.05	40.05	2.14	26	>sp|P20152|VIME_MOUSE Vimentin OS=Mus musculus OX=10090 GN=Vim PE=1 SV=3	44044	controllerType=0 controllerNumber=1 scan=18653	84.3292
09350:2	3	S.SVPGVRLLQ.D			484.796	2	968.584	968.589	0	-5.2	73	Non	214.84	6.26	6.26	2.13	26	>sp|P20152|VIME_MOUSE Vimentin OS=Mus musculus OX=10090 GN=Vim PE=1 SV=3	44044	controllerType=0 controllerNumber=1 scan=17597	79.6152
11078:2	3	E.TNLESLPLVDTHS.K			713.362	2	1425.72	1425.72	0	-3.9	426	Non	184.18	28.34	28.34	2.13	26	>sp|P20152|VIME_MOUSE Vimentin OS=Mus musculus OX=10090 GN=Vim PE=1 SV=3	44044	controllerType=0 controllerNumber=1 scan=20590	90.5164
00442:2	3	K.TVETRDGQVIN.E			616.313	2	1231.62	1231.63	0	-6.5	446	CRagged	178.77	0.46	0.46	2.13	26	>sp|P20152|VIME_MOUSE Vimentin OS=Mus musculus OX=10090 GN=Vim PE=1 SV=3	44044	controllerType=0 controllerNumber=1 scan=4900	42.5592
06402:2	246	R.TWNDPSVQQDIK.F			715.846	2	1430.68	1430.69	0	-5.1	103	Specific	320.4	153.83	153.83	5.34	1	>sp|P20029|BIP_MOUSE Endoplasmic reticulum chaperone BiP OS=Mus musculus OX=10090 GN=Hspa5 PE=1 SV=3	41097	controllerType=0 controllerNumber=1 scan=13139	66.0406
10491:2	489	S.KGPLQSVQVF.G			551.813	2	1102.62	1102.63	0	-6.8	4	Non	245.62	52.79	52.79	1.43	1	>sp|P14131|RS16_MOUSE 40S ribosomal protein S16 OS=Mus musculus OX=10090 GN=Rps16 PE=1 SV=4	49005	controllerType=0 controllerNumber=1 scan=19649	87.3058
06345:2	110	G.SYHTDINM[+15.995]L.Y		M[+16]	555.248	2	1109.49	1109.49	0	-4.7	1037	Non	316.32	93.04	93.04	5.62	3	>sp|P13864|DNMT1_MOUSE DNA (cytosine-5)-methyltransferase 1 OS=Mus musculus OX=10090 GN=Dnmt1 PE=1 SV=5	46460	controllerType=0 controllerNumber=1 scan=13066	65.8826
09328:2	110	S.SGPFRTITV.R			489.272	2	977.538	977.541	0	-4.1	1362	Non	374.23	52.13	52.13	5.06	3	>sp|P13864|DNMT1_MOUSE DNA (cytosine-5)-methyltransferase 1 OS=Mus musculus OX=10090 GN=Dnmt1 PE=1 SV=5	46460	controllerType=0 controllerNumber=1 scan=17377	78.0978
03897:2	110	L.HEFLQTEIKSQ.L			680.344	2	1359.68	1359.69	0	-7.7	50	Non	193.73	32.15	32.15	1.91	3	>sp|P13864|DNMT1_MOUSE DNA (cytosine-5)-methyltransferase 1 OS=Mus musculus OX=10090 GN=Dnmt1 PE=1 SV=5	46460	controllerType=0 controllerNumber=1 scan=9967	58.8355
04404:2	89	R.TYSDLSRSQSL.F			628.806	2	1256.6	1256.61	0	-5.5	59	CRagged	421.49	145.78	145.78	8.15	2	>sp|P12246|SAMP_MOUSE Serum amyloid P-component OS=Mus musculus OX=10090 GN=Apcs PE=1 SV=2	38072	controllerType=0 controllerNumber=1 scan=10613	60.3702
10090:2	89	R.TYSDLSRSQSLF.S			702.339	2	1403.67	1403.68	0	-6.7	59	CRagged	200.14	54.16	54.16	2.97	2	>sp|P12246|SAMP_MOUSE Serum amyloid P-component OS=Mus musculus OX=10090 GN=Apcs PE=1 SV=2	38072	controllerType=0 controllerNumber=1 scan=19058	85.5223
11749:2	1	S.SSYGGLTSPGFSYG.M			690.306	2	1379.6	1379.61	0	-5	431	Non	389.52	214.95	214.95	9.76	28	>sp|P11679|K2C8_MOUSE Keratin, type II cytoskeletal 8 OS=Mus musculus OX=10090 GN=Krt8 PE=1 SV=4	41643	controllerType=0 controllerNumber=1 scan=21795	95.4064
04924:2	1	S.SSSFSRVGSSSSSF.R			704.817	2	1408.63	1408.63	0	-5.5	35	Non	354.43	158.48	158.48	9.32	28	>sp|P11679|K2C8_MOUSE Keratin, type II cytoskeletal 8 OS=Mus musculus OX=10090 GN=Krt8 PE=1 SV=4	41643	controllerType=0 controllerNumber=1 scan=11276	61.8975
13117:2	1	S.SSYGGLTS[+79.966]PGFSY.G		S[+80]	701.777	2	1402.55	1402.56	0	-7.3	431	Non	527.52	286.59	71.5	9.31	28	>sp|P11679|K2C8_MOUSE Keratin, type II cytoskeletal 8 OS=Mus musculus OX=10090 GN=Krt8 PE=1 SV=4	41643	controllerType=0 controllerNumber=1 scan=24238	105.4
04014:2	1	T.SGPGARISSSSF.S			576.782	2	1152.56	1152.56	0	-6.6	27	Non	379	176.43	176.43	9.14	28	>sp|P11679|K2C8_MOUSE Keratin, type II cytoskeletal 8 OS=Mus musculus OX=10090 GN=Krt8 PE=1 SV=4	41643	controllerType=0 controllerNumber=1 scan=10116	59.192
07872:2	1	S.FTSGPGARISSSSF.S			700.84	2	1400.67	1400.68	0	-6.2	25	Non	329.08	164.83	164.83	9.1	28	>sp|P11679|K2C8_MOUSE Keratin, type II cytoskeletal 8 OS=Mus musculus OX=10090 GN=Krt8 PE=1 SV=4	41643	controllerType=0 controllerNumber=1 scan=15102	70.8616
11810:2	1	S.SYGGLTSPGFSYG.M			646.789	2	1292.57	1292.58	0	-7.1	432	Non	445.25	261.03	261.03	8.84	28	>sp|P11679|K2C8_MOUSE Keratin, type II cytoskeletal 8 OS=Mus musculus OX=10090 GN=Krt8 PE=1 SV=4	41643	controllerType=0 controllerNumber=1 scan=21895	95.7881
02778:2	1	R.SFTSGPGARISS.S			583.79	2	1166.57	1166.58	0	-6	24	CRagged	405.5	182.81	182.81	8.33	28	>sp|P11679|K2C8_MOUSE Keratin, type II cytoskeletal 8 OS=Mus musculus OX=10090 GN=Krt8 PE=1 SV=4	41643	controllerType=0 controllerNumber=1 scan=8548	55.4237
03578:2	1	F.TSGPGARISSSSFS.R			670.822	2	1340.64	1340.64	0	-4.8	26	Non	267.01	81.5	81.5	8.13	28	>sp|P11679|K2C8_MOUSE Keratin, type II cytoskeletal 8 OS=Mus musculus OX=10090 GN=Krt8 PE=1 SV=4	41643	controllerType=0 controllerNumber=1 scan=9567	57.8839
04771:2	1	F.TSGPGARISSSSF.S			627.307	2	1253.61	1253.61	0	-5.1	26	Non	292.32	107.74	107.74	8.1	28	>sp|P11679|K2C8_MOUSE Keratin, type II cytoskeletal 8 OS=Mus musculus OX=10090 GN=Krt8 PE=1 SV=4	41643	controllerType=0 controllerNumber=1 scan=11068	61.3846
08397:2	1	S.SFQPGFGSAGGSN.T			606.765	2	1212.52	1212.53	0	-4.7	447	Non	279.98	121.42	121.42	8.04	28	>sp|P11679|K2C8_MOUSE Keratin, type II cytoskeletal 8 OS=Mus musculus OX=10090 GN=Krt8 PE=1 SV=4	41643	controllerType=0 controllerNumber=1 scan=15783	72.4375
07440:2	1	S.FQPGFGSAGGSN.T			563.248	2	1125.49	1125.5	0	-6.2	448	Non	282.71	104.29	104.29	7.86	28	>sp|P11679|K2C8_MOUSE Keratin, type II cytoskeletal 8 OS=Mus musculus OX=10090 GN=Krt8 PE=1 SV=4	41643	controllerType=0 controllerNumber=1 scan=14538	69.5531
12188:2	1	S.SSYGGLTSPGFSY.G			661.794	2	1322.58	1322.59	0	-7.2	431	Non	305.52	155.16	155.16	7.76	28	>sp|P11679|K2C8_MOUSE Keratin, type II cytoskeletal 8 OS=Mus musculus OX=10090 GN=Krt8 PE=1 SV=4	41643	controllerType=0 controllerNumber=1 scan=22589	98.828
02862:2	1	R.SFTSGPGARIS.S			540.275	2	1079.54	1079.55	0	-5.5	24	CRagged	339.56	148.53	148.53	7.7	28	>sp|P11679|K2C8_MOUSE Keratin, type II cytoskeletal 8 OS=Mus musculus OX=10090 GN=Krt8 PE=1 SV=4	41643	controllerType=0 controllerNumber=1 scan=8655	55.6665
02556:2	1	R.SFTSGPGARISSSS.F			670.82	2	1340.63	1340.64	0	-8.9	24	CRagged	307.51	176.05	176.05	7.55	28	>sp|P11679|K2C8_MOUSE Keratin, type II cytoskeletal 8 OS=Mus musculus OX=10090 GN=Krt8 PE=1 SV=4	41643	controllerType=0 controllerNumber=1 scan=8264	54.7819
10830:2	1	L.SPLKLEVDPNIQA.V			712.39	2	1423.77	1423.78	0	-5.1	80	Non	237.26	87.9	87.9	7.36	28	>sp|P11679|K2C8_MOUSE Keratin, type II cytoskeletal 8 OS=Mus musculus OX=10090 GN=Krt8 PE=1 SV=4	41643	controllerType=0 controllerNumber=1 scan=20165	88.9781
02675:2	1	R.SFTSGPGARISSS.S			627.305	2	1253.6	1253.61	0	-7	24	CRagged	247.13	102.99	102.99	7	28	>sp|P11679|K2C8_MOUSE Keratin, type II cytoskeletal 8 OS=Mus musculus OX=10090 GN=Krt8 PE=1 SV=4	41643	controllerType=0 controllerNumber=1 scan=8410	55.0973
12240:2	1	S.SYGGLTSPGFSY.G			618.279	2	1235.55	1235.56	0	-6.1	432	Non	316.2	44.85	44.85	6.74	28	>sp|P11679|K2C8_MOUSE Keratin, type II cytoskeletal 8 OS=Mus musculus OX=10090 GN=Krt8 PE=1 SV=4	41643	controllerType=0 controllerNumber=1 scan=22693	99.268
11899:2	1	G.FGGAGVGGITAVTVN.Q			660.347	2	1319.69	1319.7	0	-5.8	61	Non	284.72	66.18	66.18	6.4	28	>sp|P11679|K2C8_MOUSE Keratin, type II cytoskeletal 8 OS=Mus musculus OX=10090 GN=Krt8 PE=1 SV=4	41643	controllerType=0 controllerNumber=1 scan=22053	96.456
08406:2	1	M.SSFQPGFGSAGGSN.T			650.281	2	1299.55	1299.56	0	-4	446	Non	268.99	110.18	110.18	6.03	28	>sp|P11679|K2C8_MOUSE Keratin, type II cytoskeletal 8 OS=Mus musculus OX=10090 GN=Krt8 PE=1 SV=4	41643	controllerType=0 controllerNumber=1 scan=15798	72.4815
02985:2	1	T.SGPGARISSSSFS.R			620.298	2	1239.59	1239.6	0	-5.6	27	Non	243.48	61.34	61.34	5.73	28	>sp|P11679|K2C8_MOUSE Keratin, type II cytoskeletal 8 OS=Mus musculus OX=10090 GN=Krt8 PE=1 SV=4	41643	controllerType=0 controllerNumber=1 scan=8823	56.1098
10208:2	1	S.SSYGGLTSPGFS.Y			580.263	2	1159.52	1159.53	0	-6.2	431	Non	257.98	36.93	36.93	4.72	28	>sp|P11679|K2C8_MOUSE Keratin, type II cytoskeletal 8 OS=Mus musculus OX=10090 GN=Krt8 PE=1 SV=4	41643	controllerType=0 controllerNumber=1 scan=19224	85.989
11296:2	1	T.SPGFSYGM[+15.995]SSFQP.G		M[+16]	704.293	2	1407.58	1407.59	0	-7.6	438	Non	239.86	48.66	48.66	4.31	28	>sp|P11679|K2C8_MOUSE Keratin, type II cytoskeletal 8 OS=Mus musculus OX=10090 GN=Krt8 PE=1 SV=4	41643	controllerType=0 controllerNumber=1 scan=20991	92.159
03840:2	1	S.SSFRGSM[+15.995]GTGVGLGG.F		M[+16]	693.324	2	1385.64	1385.65	0	-4.7	46	Non	183.99	52.6	52.6	3.87	28	>sp|P11679|K2C8_MOUSE Keratin, type II cytoskeletal 8 OS=Mus musculus OX=10090 GN=Krt8 PE=1 SV=4	41643	controllerType=0 controllerNumber=1 scan=9899	58.6845
10058:2	1	L.SPLKLEVDPNIQ.A			676.87	2	1352.73	1352.74	0	-7.1	80	Non	221.24	26.89	26.89	2.85	28	>sp|P11679|K2C8_MOUSE Keratin, type II cytoskeletal 8 OS=Mus musculus OX=10090 GN=Krt8 PE=1 SV=4	41643	controllerType=0 controllerNumber=1 scan=19013	85.3938
04728:2	1	S.SSFSRVGSSSSSF.R			661.299	2	1321.59	1321.6	0	-8.1	36	Non	196.34	44.88	44.88	2.79	28	>sp|P11679|K2C8_MOUSE Keratin, type II cytoskeletal 8 OS=Mus musculus OX=10090 GN=Krt8 PE=1 SV=4	41643	controllerType=0 controllerNumber=1 scan=11012	61.2567
03030:3	1	S.TSGPRAFSSRSFT.S			467.565	3	1400.68	1400.69	0	-8.9	14	Non	158.15	47.49	47.49	2.24	28	>sp|P11679|K2C8_MOUSE Keratin, type II cytoskeletal 8 OS=Mus musculus OX=10090 GN=Krt8 PE=1 SV=4	41643	controllerType=0 controllerNumber=1 scan=8879	56.2401
04295:2	1	S.SFSRVGSSSSSF.R			617.784	2	1234.56	1234.57	0	-8	37	Non	143.33	35.36	35.36	2.17	28	>sp|P11679|K2C8_MOUSE Keratin, type II cytoskeletal 8 OS=Mus musculus OX=10090 GN=Krt8 PE=1 SV=4	41643	controllerType=0 controllerNumber=1 scan=10472	60.0319
04854:2	1	R.SFTSGPGARI.S			496.76	2	992.513	992.516	0	-3.5	24	CRagged	283.47	15.2	15.2	2.13	28	>sp|P11679|K2C8_MOUSE Keratin, type II cytoskeletal 8 OS=Mus musculus OX=10090 GN=Krt8 PE=1 SV=4	41643	controllerType=0 controllerNumber=1 scan=11185	61.6804
10449:2	207	R.TPLATIADQQQLQ.L			713.877	2	1426.75	1426.75	0	-5.4	6	CRagged	267.09	122.67	122.67	7.27	1	>sp|P11157|RIR2_MOUSE Ribonucleoside-diphosphate reductase subunit M2 OS=Mus musculus OX=10090 GN=Rrm2 PE=1 SV=1	48719	controllerType=0 controllerNumber=1 scan=19587	87.1123
09361:2	31	N.HPGQISAGYAPVLD.C			712.861	2	1424.71	1424.72	0	-2.1	349	Non	267.52	88.48	88.48	7.11	5	>sp|P10126|EF1A1_MOUSE Elongation factor 1-alpha 1 OS=Mus musculus OX=10090 GN=Eef1a1 PE=1 SV=3	46740	controllerType=0 controllerNumber=1 scan=17648	79.9277
09619:2	31	N.HPGQISAGYAPVL.D			655.345	2	1309.68	1309.69	0	-5	349	Non	260.09	78.79	78.79	6.69	5	>sp|P10126|EF1A1_MOUSE Elongation factor 1-alpha 1 OS=Mus musculus OX=10090 GN=Eef1a1 PE=1 SV=3	46740	controllerType=0 controllerNumber=1 scan=18350	83.3891
12032:2	31	Q.DVYKIGGIGTVPVG.R			687.881	2	1374.75	1374.76	0	-6.1	252	Non	222.41	47.32	47.32	4.68	5	>sp|P10126|EF1A1_MOUSE Elongation factor 1-alpha 1 OS=Mus musculus OX=10090 GN=Eef1a1 PE=1 SV=3	46740	controllerType=0 controllerNumber=1 scan=22299	97.542
05047:2	31	E.TGVLKPGM[+15.995]VVT.F		M[+16]	559.315	2	1117.62	1117.63	0	-5.1	269	Non	237.12	41.25	41.25	4.32	5	>sp|P10126|EF1A1_MOUSE Elongation factor 1-alpha 1 OS=Mus musculus OX=10090 GN=Eef1a1 PE=1 SV=3	46740	controllerType=0 controllerNumber=1 scan=11430	62.2334
03058:2	31	N.HPGQISAGYAP.V			549.268	2	1097.53	1097.54	0	-8.4	349	Non	153.61	7.38	7.38	1.9	5	>sp|P10126|EF1A1_MOUSE Elongation factor 1-alpha 1 OS=Mus musculus OX=10090 GN=Eef1a1 PE=1 SV=3	46740	controllerType=0 controllerNumber=1 scan=8912	56.3128
07060:2	192	K.TPAQFDADELR.G			631.801	2	1262.59	1262.6	0	-5.7	114	Specific	395.83	211.11	211.11	7.38	2	>sp|P10107|ANXA1_MOUSE Annexin A1 OS=Mus musculus OX=10090 GN=Anxa1 PE=1 SV=2	52429	controllerType=0 controllerNumber=1 scan=14034	68.3634
03237:3	192	K.KYGISLCQAI.L			365.863	3	1095.58	1095.59	0	-9.9	318	CRagged	42.35	42.13	42.13	1.69	2	>sp|P10107|ANXA1_MOUSE Annexin A1 OS=Mus musculus OX=10090 GN=Anxa1 PE=1 SV=2	52429	controllerType=0 controllerNumber=1 scan=9137	56.8593
05097:2	21	K.SAVTTVVNPKYEG.K			682.853	2	1364.7	1364.71	0	-4.7	785	CRagged	425.56	208.39	208.39	8.9	6	>sp|P09055|ITB1_MOUSE Integrin beta-1 OS=Mus musculus OX=10090 GN=Itgb1 PE=1 SV=1	41455	controllerType=0 controllerNumber=1 scan=11492	62.3639
02046:2	21	K.SAVTTVVNPKYEGK.-			746.9	2	1492.79	1492.8	0	-5.4	785	Specific	511.96	299.93	299.93	7.9	6	>sp|P09055|ITB1_MOUSE Integrin beta-1 OS=Mus musculus OX=10090 GN=Itgb1 PE=1 SV=1	41455	controllerType=0 controllerNumber=1 scan=7592	53.039
05353:2	21	K.SAVTTVVNPKYE.G			654.344	2	1307.68	1307.68	0	-3	785	CRagged	400.37	249.97	249.97	7.57	6	>sp|P09055|ITB1_MOUSE Integrin beta-1 OS=Mus musculus OX=10090 GN=Itgb1 PE=1 SV=1	41455	controllerType=0 controllerNumber=1 scan=11821	63.1084
00600:2	21	T.TVVNPKYE.G			475.25	2	949.493	949.499	0	-6.6	789	Non	130.91	15.82	15.82	2.12	6	>sp|P09055|ITB1_MOUSE Integrin beta-1 OS=Mus musculus OX=10090 GN=Itgb1 PE=1 SV=1	41455	controllerType=0 controllerNumber=1 scan=5302	44.9006
11265:2	21	K.RAEDYPIDLYY[+79.966].L		Y[+80]	749.313	2	1497.62	1497.63	0	-6.7	137	CRagged	132.13	23.95	23.95	1.73	6	>sp|P09055|ITB1_MOUSE Integrin beta-1 OS=Mus musculus OX=10090 GN=Itgb1 PE=1 SV=1	41455	controllerType=0 controllerNumber=1 scan=20931	91.8897
11662:2	165	A.YYLNDLERI.A			599.804	2	1198.6	1198.61	0	-7.3	155	Non	390.19	124.18	124.18	7.53	3	>sp|P08752|GNAI2_MOUSE Guanine nucleotide-binding protein G(i) subunit alpha-2 OS=Mus musculus OX=10090 GN=Gnai2 PE=1 SV=5	42097	controllerType=0 controllerNumber=1 scan=21628	94.682
09842:2	165	A.SYIQSKFEDL.N			615.303	2	1229.6	1229.6	0	-5.4	302	Non	227.84	36.78	36.78	2.22	3	>sp|P08752|GNAI2_MOUSE Guanine nucleotide-binding protein G(i) subunit alpha-2 OS=Mus musculus OX=10090 GN=Gnai2 PE=1 SV=5	42097	controllerType=0 controllerNumber=1 scan=18698	84.4654
11016:2	69	D.HGVLLVGYGYEGT.D			682.842	2	1364.68	1364.68	0	-5	276	Non	290.11	136.77	136.77	8.16	2	>sp|P06797|CATL1_MOUSE Cathepsin L1 OS=Mus musculus OX=10090 GN=Ctsl PE=1 SV=2	41159	controllerType=0 controllerNumber=1 scan=20489	90.1458
05861:2	69	A.TPKFDQTFS.A			535.759	2	1070.51	1070.52	0	-4.9	18	Non	283.77	90.5	90.5	5.56	2	>sp|P06797|CATL1_MOUSE Cathepsin L1 OS=Mus musculus OX=10090 GN=Ctsl PE=1 SV=2	41159	controllerType=0 controllerNumber=1 scan=12463	64.5553
11159:2	369	A.TIDQNLEDL.R			530.758	2	1060.51	1060.52	0	-5.9	211	Non	352.15	60.9	60.9	3.25	2	>sp|P06728|APOA4_MOUSE Apolipoprotein A-IV OS=Mus musculus OX=10090 GN=Apoa4 PE=1 SV=3	40862	controllerType=0 controllerNumber=1 scan=20728	91.0446
04178:2	236	A.SQQVLQYNSAN.-			626.297	2	1251.59	1251.6	0	-8.5	223	Non	314.52	114.63	114.63	5.48	1	>sp|P04184|KITH_MOUSE Thymidine kinase, cytosolic OS=Mus musculus OX=10090 GN=Tk1 PE=1 SV=3	41905	controllerType=0 controllerNumber=1 scan=10328	59.6976
12986:2	28	K.TWTAADTAALIT.R			617.814	2	1234.62	1234.63	0	-7.8	153	CRagged	604.54	234.41	234.41	9.69	2	>sp|P01902|HA1D_MOUSE H-2 class I histocompatibility antigen, K-D alpha chain OS=Mus musculus OX=10090 GN=H2-K1 PE=1 SV=1	45972	controllerType=0 controllerNumber=1 scan=24078	105.098
11698:2	28	K.TWTAADTAALITR.R			695.865	2	1390.72	1390.73	0	-7.6	153	Specific	600.68	324.94	324.94	9.42	2	>sp|P01902|HA1D_MOUSE H-2 class I histocompatibility antigen, K-D alpha chain OS=Mus musculus OX=10090 GN=H2-K1 PE=1 SV=1	45972	controllerType=0 controllerNumber=1 scan=21698	95.0125
06011:2	73	A.IQKTPQIQVYS.R			652.86	2	1304.71	1304.72	0	-6.2	21	Non	308.91	128.65	128.65	8.25	3	>sp|P01887|B2MG_MOUSE Beta-2-microglobulin OS=Mus musculus OX=10090 GN=B2m PE=1 SV=2	39731	controllerType=0 controllerNumber=1 scan=12644	64.9412
04030:2	73	Q.KTPQIQVYS.R			532.289	2	1063.57	1063.58	0	-6.4	23	Non	281.66	50.87	50.87	4.97	3	>sp|P01887|B2MG_MOUSE Beta-2-microglobulin OS=Mus musculus OX=10090 GN=B2m PE=1 SV=2	39731	controllerType=0 controllerNumber=1 scan=10138	59.2511
06071:2	73	A.HTEFTPTETDTY.A			721.307	2	1441.61	1441.61	0	-3.5	87	Non	131	38.48	38.48	2.14	3	>sp|P01887|B2MG_MOUSE Beta-2-microglobulin OS=Mus musculus OX=10090 GN=B2m PE=1 SV=2	39731	controllerType=0 controllerNumber=1 scan=12721	65.1142
11737:2	6	N.TEPVLDSDGSYFM[+15.995].Y		M[+16]	738.81	2	1476.61	1476.62	0	-5.3	277	Non	571.36	377.86	377.86	10.71	8	>sp|P01863|GCAA_MOUSE Ig gamma-2A chain C region, A allele OS=Mus musculus OX=10090 GN=Ighg PE=1 SV=1	45190	controllerType=0 controllerNumber=1 scan=21778	95.357
13013:2	6	N.TEPVLDSDGSYFM.Y			730.812	2	1460.62	1460.62	0	-5.8	277	Non	533.33	324.19	324.19	10.13	8	>sp|P01863|GCAA_MOUSE Ig gamma-2A chain C region, A allele OS=Mus musculus OX=10090 GN=Ighg PE=1 SV=1	45190	controllerType=0 controllerNumber=1 scan=24108	105.143
12523:2	6	N.TEPVLDSDGSYF.M			665.292	2	1329.58	1329.58	0	-6.2	277	Non	480.84	310.81	310.81	9.47	8	>sp|P01863|GCAA_MOUSE Ig gamma-2A chain C region, A allele OS=Mus musculus OX=10090 GN=Ighg PE=1 SV=1	45190	controllerType=0 controllerNumber=1 scan=23247	101.835
09035:2	6	N.TEPVLDSDGSY.F			591.758	2	1182.51	1182.52	0	-6.5	277	Non	521.7	260.19	260.19	9.1	8	>sp|P01863|GCAA_MOUSE Ig gamma-2A chain C region, A allele OS=Mus musculus OX=10090 GN=Ighg PE=1 SV=1	45190	controllerType=0 controllerNumber=1 scan=16637	74.508
12437:2	6	K.TTAPSVYPLAPVCG.D			688.346	2	1375.68	1375.69	0	-5.7	3	CRagged	465.64	196.11	196.11	8.92	8	>sp|P01863|GCAA_MOUSE Ig gamma-2A chain C region, A allele OS=Mus musculus OX=10090 GN=Ighg PE=1 SV=1	45190	controllerType=0 controllerNumber=1 scan=23092	101.211
12851:2	6	K.TTAPSVYPLAPV.C			608.331	2	1215.65	1215.66	0	-5.7	3	CRagged	418.2	199.64	199.64	8.54	8	>sp|P01863|GCAA_MOUSE Ig gamma-2A chain C region, A allele OS=Mus musculus OX=10090 GN=Ighg PE=1 SV=1	45190	controllerType=0 controllerNumber=1 scan=23903	104.684
11794:2	6	K.TTAPSVYPLAP.V			558.796	2	1116.59	1116.59	0	-7.6	3	CRagged	225.77	30.2	30.2	2.15	8	>sp|P01863|GCAA_MOUSE Ig gamma-2A chain C region, A allele OS=Mus musculus OX=10090 GN=Ighg PE=1 SV=1	45190	controllerType=0 controllerNumber=1 scan=21872	95.7201
00160:2	6	K.SFSRTPG.K			376.188	2	751.368	751.373	0	-7.3	323	CRagged	246.41	23.27	23.27	1.52	8	>sp|P01863|GCAA_MOUSE Ig gamma-2A chain C region, A allele OS=Mus musculus OX=10090 GN=Ighg PE=1 SV=1	45190	controllerType=0 controllerNumber=1 scan=3687	33.6809
05314:2	55	K.TSTSPIVKSFN.R			590.811	2	1180.61	1180.62	0	-5.2	93	CRagged	384.95	132.44	132.44	8.13	3	>sp|P01837|IGKC_MOUSE Immunoglobulin kappa constant OS=Mus musculus OX=10090 GN=Igkc PE=1 SV=2	43440	controllerType=0 controllerNumber=1 scan=11772	63.001
06959:2	55	K.TSTSPIVKSF.N			533.789	2	1066.57	1066.58	0	-7.2	93	CRagged	365	83.64	83.64	6.13	3	>sp|P01837|IGKC_MOUSE Immunoglobulin kappa constant OS=Mus musculus OX=10090 GN=Igkc PE=1 SV=2	43440	controllerType=0 controllerNumber=1 scan=13911	68.0943
00237:2	55	K.TSTSPIVK.S			416.74	2	832.472	832.477	0	-6.4	93	Specific	250.35	32.54	32.54	1.57	3	>sp|P01837|IGKC_MOUSE Immunoglobulin kappa constant OS=Mus musculus OX=10090 GN=Igkc PE=1 SV=2	43440	controllerType=0 controllerNumber=1 scan=4244	38.2492
12466:2	42	K.TIYTPGSTVLY.R			607.816	2	1214.62	1214.63	0	-4.3	138	CRagged	323.31	131.14	131.14	7.27	4	>sp|P01027|CO3_MOUSE Complement C3 OS=Mus musculus OX=10090 GN=C3 PE=1 SV=3	39615	controllerType=0 controllerNumber=1 scan=23150	101.472
11774:2	42	K.TIYTPGSTVL.Y			526.284	2	1051.56	1051.57	0	-5	138	CRagged	381.38	141.13	141.13	7.08	4	>sp|P01027|CO3_MOUSE Complement C3 OS=Mus musculus OX=10090 GN=C3 PE=1 SV=3	39615	controllerType=0 controllerNumber=1 scan=21832	95.5186
05099:2	42	K.TVLTGASGHL.R			478.262	2	955.516	955.521	0	-5.3	75	CRagged	307.98	44.56	44.56	4.38	4	>sp|P01027|CO3_MOUSE Complement C3 OS=Mus musculus OX=10090 GN=C3 PE=1 SV=3	39615	controllerType=0 controllerNumber=1 scan=11495	62.3709
09172:2	238	F.TVGLDVDTRAY.F			605.307	2	1209.61	1209.61	0	-3.6	294	Non	287.22	84.39	84.39	5.05	3	>sp|P00397|COX1_MOUSE Cytochrome c oxidase subunit 1 OS=Mus musculus OX=10090 GN=Mtco1 PE=1 SV=2	39716	controllerType=0 controllerNumber=1 scan=16823	74.9753
09371:2	400	N.HLPDDINVY.A			543.263	2	1085.52	1085.53	0	-6.5	199	Non	270.27	47.76	47.76	2.37	2	>sp|O89017|LGMN_MOUSE Legumain OS=Mus musculus OX=10090 GN=Lgmn PE=1 SV=1	47400	controllerType=0 controllerNumber=1 scan=17719	80.3899
09290:2	15	G.SGSYNDFGNY.N			562.217	2	1123.43	1123.43	0	-5.8	297	Non	368.98	162.16	162.16	8.05	9	>sp|O88569|ROA2_MOUSE Heterogeneous nuclear ribonucleoproteins A2/B1 OS=Mus musculus OX=10090 GN=Hnrnpa2b1 PE=1 SV=2	48894	controllerType=0 controllerNumber=1 scan=16995	75.437
06734:2	15	G.SGSYNDFGNYNQQ.P			747.296	2	1493.58	1493.59	0	-5.5	297	Non	255.56	127.06	127.06	7.52	9	>sp|O88569|ROA2_MOUSE Heterogeneous nuclear ribonucleoproteins A2/B1 OS=Mus musculus OX=10090 GN=Hnrnpa2b1 PE=1 SV=2	48894	controllerType=0 controllerNumber=1 scan=13636	67.5035
06051:2	15	D.SRGGGGNFGPGPGSNF.R			732.832	2	1464.66	1464.66	0	-3.4	212	Non	258.57	114.26	114.26	7.03	9	>sp|O88569|ROA2_MOUSE Heterogeneous nuclear ribonucleoproteins A2/B1 OS=Mus musculus OX=10090 GN=Hnrnpa2b1 PE=1 SV=2	48894	controllerType=0 controllerNumber=1 scan=12697	65.0614
05050:2	15	G.SDGYGSGRGFGDGY.N			697.781	2	1394.55	1394.56	0	-4.8	231	Non	185.06	89.1	89.1	5.07	9	>sp|O88569|ROA2_MOUSE Heterogeneous nuclear ribonucleoproteins A2/B1 OS=Mus musculus OX=10090 GN=Hnrnpa2b1 PE=1 SV=2	48894	controllerType=0 controllerNumber=1 scan=11434	62.2418
04910:2	15	R.NM[+15.995]GGPYGGGNYGP.G		M[+16]	628.749	2	1256.49	1256.5	0	-7.9	326	CRagged	221.87	110.1	110.1	3.53	9	>sp|O88569|ROA2_MOUSE Heterogeneous nuclear ribonucleoproteins A2/B1 OS=Mus musculus OX=10090 GN=Hnrnpa2b1 PE=1 SV=2	48894	controllerType=0 controllerNumber=1 scan=11259	61.8563
09524:2	15	N.YGSGSYNDFGNY.N			672.259	2	1343.51	1343.52	0	-5.4	295	Non	177.57	66.88	66.88	3.06	9	>sp|O88569|ROA2_MOUSE Heterogeneous nuclear ribonucleoproteins A2/B1 OS=Mus musculus OX=10090 GN=Hnrnpa2b1 PE=1 SV=2	48894	controllerType=0 controllerNumber=1 scan=18202	82.9488
04349:2	15	G.SGRGFGDGYNGY.G			625.261	2	1249.52	1249.52	0	-5.9	236	Non	127.37	21.81	21.81	2.14	9	>sp|O88569|ROA2_MOUSE Heterogeneous nuclear ribonucleoproteins A2/B1 OS=Mus musculus OX=10090 GN=Hnrnpa2b1 PE=1 SV=2	48894	controllerType=0 controllerNumber=1 scan=10542	60.2058
05056:2	15	N.M[+15.995]GGPYGGGNYGP.G		M[+16]	571.728	2	1142.45	1142.46	0	-7	327	Non	156.24	20.08	20.08	2.14	9	>sp|O88569|ROA2_MOUSE Heterogeneous nuclear ribonucleoproteins A2/B1 OS=Mus musculus OX=10090 GN=Hnrnpa2b1 PE=1 SV=2	48894	controllerType=0 controllerNumber=1 scan=11441	62.2575
07086:2	15	G.SGSYNDFGNYN.Q			619.237	2	1237.47	1237.48	0	-6.8	297	Non	141.16	22.65	22.65	1.64	9	>sp|O88569|ROA2_MOUSE Heterogeneous nuclear ribonucleoproteins A2/B1 OS=Mus musculus OX=10090 GN=Hnrnpa2b1 PE=1 SV=2	48894	controllerType=0 controllerNumber=1 scan=14068	68.4435
04721:2	296	T.SPATPLPAGSGIK.R			598.334	2	1195.66	1195.67	0	-6.8	203	NRagged	267.73	49.78	49.78	4.62	1	>sp|O88271|CFDP1_MOUSE Craniofacial development protein 1 OS=Mus musculus OX=10090 GN=Cfdp1 PE=1 SV=1	40628	controllerType=0 controllerNumber=1 scan=11003	61.2366
06080:2	309	M.TAGINADGHLIN.T			598.303	2	1195.6	1195.61	0	-6.1	289	Non	262.92	67.47	67.47	4.37	1	>sp|O70494|SP3_MOUSE Transcription factor Sp3 OS=Mus musculus OX=10090 GN=Sp3 PE=1 SV=2	37001	controllerType=0 controllerNumber=1 scan=12736	65.1563
08503:2	389	S.VGASKAVFL.W			446.266	2	891.524	891.53	0	-6.4	232	Non	300.35	56.64	56.64	2.82	1	>sp|O54927|WSB1_MOUSE WD repeat and SOCS box-containing protein 1 OS=Mus musculus OX=10090 GN=Wsb1 PE=1 SV=1	44565	controllerType=0 controllerNumber=1 scan=15924	72.7718
08622:2	184	K.SFTPDHVVY.A			532.753	2	1064.5	1064.5	0	-5.7	302	CRagged	339.04	129.94	129.94	6.62	2	>sp|O54724|CAVN1_MOUSE Caveolae-associated protein 1 OS=Mus musculus OX=10090 GN=Cavin1 PE=1 SV=1	40081	controllerType=0 controllerNumber=1 scan=16074	73.1084
08462:2	184	K.SFTPDHVVYA.R			568.271	2	1135.54	1135.54	0	-5.4	302	CRagged	271.32	44.38	44.38	3.24	2	>sp|O54724|CAVN1_MOUSE Caveolae-associated protein 1 OS=Mus musculus OX=10090 GN=Cavin1 PE=1 SV=1	40081	controllerType=0 controllerNumber=1 scan=15868	72.6308
05531:2	182	K.YSAARSVPASNYV.-			692.843	2	1384.68	1384.69	0	-4.6	198	CRagged	343.89	153.74	153.74	7.56	1	>sp|O35054|CLD4_MOUSE Claudin-4 OS=Mus musculus OX=10090 GN=Cldn4 PE=1 SV=1	39578	controllerType=0 controllerNumber=1 scan=12057	63.6624
02957:2	321	S.HQQVNGTAGLGPPAT.V			724.365	2	1447.72	1447.73	0	-4.6	535	Non	177.92	69.61	69.61	4.23	1	>sp|O08789|MNT_MOUSE Max-binding protein MNT OS=Mus musculus OX=10090 GN=Mnt PE=2 SV=2	48170	controllerType=0 controllerNumber=1 scan=8782	55.9928
06687:2	272	R.DYQDVRNEI.P			576.268	2	1151.53	1151.53	0	-3.9	559	CRagged	401.84	160.58	160.58	4.98	1	>sp|G5E829|AT2B1_MOUSE Plasma membrane calcium-transporting ATPase 1 OS=Mus musculus OX=10090 GN=Atp2b1 PE=1 SV=1	50354	controllerType=0 controllerNumber=1 scan=13566	67.3143
05134:2	307	K.YM[+15.995]LTHQEL.A		M[+16]	525.747	2	1050.49	1050.49	0	-5.2	851	CRagged	360.75	105.99	105.99	3.81	2	>sp|E9Q5G3|KIF23_MOUSE Kinesin-like protein KIF23 OS=Mus musculus OX=10090 GN=Kif23 PE=1 SV=1	41480	controllerType=0 controllerNumber=1 scan=11539	62.4611
08254:2	333	H.TYLPQVSHY.R			554.274	2	1107.54	1107.55	0	-4.9	168	Non	295.14	60.25	60.25	4.07	1	>sp|A6H5Z3|EXC6B_MOUSE Exocyst complex component 6B OS=Mus musculus OX=10090 GN=Exoc6b PE=1 SV=1	45620	controllerType=0 controllerNumber=1 scan=15605	72.0487
10176:2	245	S.TYVPIAQQV.E			509.779	2	1018.55	1018.56	0	-6.5	325	Non	281.74	67.36	67.36	5.36	1	>sp|A2APB8|TPX2_MOUSE Targeting protein for Xklp2 OS=Mus musculus OX=10090 GN=Tpx2 PE=1 SV=1	44138	controllerType=0 controllerNumber=1 scan=19179	85.8578
09482:2	170	V.TFHPTISGL.I			486.759	2	972.51	972.515	0	-4.7	102	Non	385.93	102.26	102.26	7.74	1	>sp|A2AH22|AMRA1_MOUSE Activating molecule in BECN1-regulated autophagy protein 1 OS=Mus musculus OX=10090 GN=Ambra1 PE=1 SV=1	52468	controllerType=0 controllerNumber=1 scan=18127	82.6789
06861:2	155	T.HSIIPGHPATF.L			588.808	2	1176.61	1176.62	0	-6.2	1426	Non	372.96	134.98	134.98	7.97	1	>sp|A2A6A1|GPTC8_MOUSE G patch domain-containing protein 8 OS=Mus musculus OX=10090 GN=Gpatch8 PE=1 SV=1	42781	controllerType=0 controllerNumber=1 scan=13788	67.8234
14403:2	305	L.GYFPTAANL.S			477.237	2	953.467	953.473	0	-6.3	612	Non	307.05	65.72	65.72	5.51	1	>tr|Z4YJI3|Z4YJI3_MOUSE Epithelial-splicing regulatory protein 1 OS=Mus musculus OX=10090 GN=Esrp1 PE=1 SV=1	16296	controllerType=0 controllerNumber=1 scan=25023	97.2598
05102:2	235	N.LPQKAGGFLM[+15.995].K		M[+16]	539.289	2	1077.57	1077.58	0	-5.2	181	Non	241.27	58.94	58.94	6.18	1	>tr|S4R2M7|S4R2M7_MOUSE Phosphoglycerate kinase OS=Mus musculus OX=10090 GN=Pgk1 PE=1 SV=1	21648	controllerType=0 controllerNumber=1 scan=11985	63.3633
07007:2	31	N.SHSSTFDAGAGIALN.D			724.34	2	1447.67	1447.68	0	-5.5	245	Non	368.33	205.36	205.36	11.73	1	>tr|S4R257|S4R257_MOUSE Glyceraldehyde-3-phosphate dehydrogenase (Fragment) OS=Mus musculus OX=10090 GN=Gapdh PE=1 SV=1	6894	controllerType=0 controllerNumber=1 scan=14840	71.1997
10054:2	291	T.QYQSLLRSL.S			554.307	2	1107.61	1107.62	0	-8.2	4849	Non	243.22	70.62	70.62	5.87	2	>tr|S4R1P5|S4R1P5_MOUSE Dystonin OS=Mus musculus OX=10090 GN=Dst PE=1 SV=1	10286	controllerType=0 controllerNumber=1 scan=19398	84.4977
05703:2	201	K.ESAPSRIVNL.S			543.298	2	1085.59	1085.59	0	-6.2	147	CRagged	314.87	95.6	95.6	7.11	1	>tr|Q9R1R8|Q9R1R8_MOUSE Retinol dehydrogenase 11 OS=Mus musculus OX=10090 GN=Rdh11 PE=1 SV=1	1249	controllerType=0 controllerNumber=1 scan=12936	66.1671
05305:2	17	H.NPHVNPLPTGYE.D			669.323	2	1337.64	1337.65	0	-6.8	99	Non	305.29	172.29	172.29	9.3	2	>tr|Q9DCW5|Q9DCW5_MOUSE Cytochrome c oxidase subunit 6A, mitochondrial OS=Mus musculus OX=10090 GN=Cox6a1 PE=1 SV=1	5312	controllerType=0 controllerNumber=1 scan=12347	64.6231
04446:2	17	P.HVNPLPTGYEDE.-			685.811	2	1370.61	1370.62	0	-5.6	101	Non	338.56	194.66	194.66	8.76	2	>tr|Q9DCW5|Q9DCW5_MOUSE Cytochrome c oxidase subunit 6A, mitochondrial OS=Mus musculus OX=10090 GN=Cox6a1 PE=1 SV=1	5312	controllerType=0 controllerNumber=1 scan=11093	61.2571
04991:2	152	A.SYGDLKNAI.E			490.753	2	980.499	980.505	0	-6.4	153	Non	331.95	49.58	49.58	7.9	1	>tr|Q9D8S5|Q9D8S5_MOUSE MCG7614, isoform CRA_c OS=Mus musculus OX=10090 GN=Srsf5 PE=1 SV=1	27532	controllerType=0 controllerNumber=1 scan=11824	62.9636
08707:2	57	F.TYVNVYGTHVL.V			633.325	2	1265.64	1265.65	0	-7.7	115	Non	342.35	166.36	166.36	9.66	1	>tr|Q9D0D1|Q9D0D1_MOUSE TDP-glucose 4,6-dehydratase, isoform CRA_c OS=Mus musculus OX=10090 GN=Tgds PE=2 SV=1	27949	controllerType=0 controllerNumber=1 scan=17684	80.7824
07232:2	299	L.RYLPTGSFP.F			519.271	2	1037.53	1037.54	0	-6.5	18	Non	316.47	62.56	62.56	5.6	1	>tr|Q99J74|Q99J74_MOUSE Tumor suppressor candidate 3 OS=Mus musculus OX=10090 GN=Tusc3 PE=1 SV=1	3091	controllerType=0 controllerNumber=1 scan=15602	75.3642
04393:2	185	L.GYLPGKGTGSL.L			525.281	2	1049.56	1049.56	0	-6.9	147	Non	273.46	81.62	81.62	7.32	1	>tr|Q921T5|Q921T5_MOUSE Jarid1a protein OS=Mus musculus OX=10090 GN=Kdm5a PE=1 SV=1	3569	controllerType=0 controllerNumber=1 scan=11011	61.0223
06358:2	414	D.KFLASVSTV.L			476.276	2	951.545	951.551	0	-6.3	128	Non	287.63	28.76	28.76	1.46	2	>tr|Q91VB8|Q91VB8_MOUSE Alpha globin 1 OS=Mus musculus OX=10090 GN=Hba-a1 PE=1 SV=1	269	controllerType=0 controllerNumber=1 scan=13913	68.8051
06492:2	241	K.KYIDQKFVL.A			577.33	2	1153.65	1153.66	0	-7.3	225	CRagged	315.42	150.84	150.84	6.51	2	>tr|Q91V89|Q91V89_MOUSE Serine/threonine-protein phosphatase 2A 56 kDa regulatory subunit OS=Mus musculus OX=10090 GN=Ppp2r5d PE=1 SV=1	2761	controllerType=0 controllerNumber=1 scan=14105	69.2829
06034:2	327	L.SYLPRAGADL.V			531.779	2	1062.55	1062.56	0	-7.4	404	Non	299.2	19.69	19.69	3.19	1	>tr|Q8VC10|Q8VC10_MOUSE Oxidative stress-induced growth inhibitor 1 OS=Mus musculus OX=10090 GN=Osgin1 PE=2 SV=1	2041	controllerType=0 controllerNumber=1 scan=13434	67.542
05253:2	237	Q.GYNVSVEKL.L			504.769	2	1008.53	1008.54	0	-6.3	78	Non	291.77	81.67	81.67	6.52	2	>tr|Q8K2J1|Q8K2J1_MOUSE Car12 protein OS=Mus musculus OX=10090 GN=Car12 PE=1 SV=1	4564	controllerType=0 controllerNumber=1 scan=12250	64.2778
09373:2	62	G.SELVQKFIGEGA.R			639.336	2	1277.66	1277.67	0	-7.2	217	Non	344.81	120.17	120.17	9.45	1	>tr|Q8K1K2|Q8K1K2_MOUSE 26S proteasome regulatory subunit 8 OS=Mus musculus OX=10090 GN=Psmc5 PE=1 SV=1	4305	controllerType=0 controllerNumber=1 scan=18517	82.5301
06160:2	100	A.SYVQVIRAP.E			516.792	2	1032.58	1032.58	0	-6	54	Non	374.75	72.83	72.83	8.74	1	>tr|Q8C788|Q8C788_MOUSE Sorting nexin OS=Mus musculus OX=10090 GN=Snx18 PE=1 SV=1	4909	controllerType=0 controllerNumber=1 scan=13631	68.111
04752:2	259	G.SYKAM[+15.995]FQQL.M		M[+16]	566.274	2	1131.54	1131.55	0	-7.9	205	Non	276.89	45.6	45.6	5.87	1	>tr|Q8C2T6|Q8C2T6_MOUSE DNA polymerase alpha subunit B OS=Mus musculus OX=10090 GN=Pola2 PE=1 SV=1	4562	controllerType=0 controllerNumber=1 scan=11508	62.244
08077:2	207	K.TEEKPIFSLNT.I			639.828	2	1278.65	1278.66	0	-7.4	174	CRagged	276.8	105.61	105.61	6.96	1	>tr|Q8C2Q8|Q8C2Q8_MOUSE ATP synthase subunit gamma OS=Mus musculus OX=10090 GN=Atp5c1 PE=1 SV=1	2725	controllerType=0 controllerNumber=1 scan=16879	79.0412
08155:2	334	L.SYLPGVREL.L			517.284	2	1033.56	1033.57	0	-6.7	264	Non	296.79	4.13	4.13	3.12	1	>tr|Q8BWX4|Q8BWX4_MOUSE Dynein regulatory complex subunit 3 OS=Mus musculus OX=10090 GN=Drc3 PE=1 SV=1	3413	controllerType=0 controllerNumber=1 scan=16982	79.2641
14786:2	5	G.SNFVSAGIQTSF.R			629.305	2	1257.6	1257.61	0	-6.6	547	Non	491.14	283.83	283.83	11.37	3	>tr|Q8BTS0|Q8BTS0_MOUSE DEAD (Asp-Glu-Ala-Asp) box polypeptide 5 OS=Mus musculus OX=10090 GN=Ddx5 PE=1 SV=1	5582	controllerType=0 controllerNumber=1 scan=25554	98.5867
09328:2	5	Y.SAANYTNGSFGSNF.V			718.802	2	1436.6	1436.61	0	-7.4	536	Non	296.83	141.81	141.81	9.37	3	>tr|Q8BTS0|Q8BTS0_MOUSE DEAD (Asp-Glu-Ala-Asp) box polypeptide 5 OS=Mus musculus OX=10090 GN=Ddx5 PE=1 SV=1	5582	controllerType=0 controllerNumber=1 scan=18461	82.4125
06784:2	5	G.SNFVSAGIQTS.F			555.77	2	1110.53	1110.54	0	-8.4	547	Non	223.44	72.4	72.4	3.81	3	>tr|Q8BTS0|Q8BTS0_MOUSE DEAD (Asp-Glu-Ala-Asp) box polypeptide 5 OS=Mus musculus OX=10090 GN=Ddx5 PE=1 SV=1	5582	controllerType=0 controllerNumber=1 scan=14473	70.0203
06907:2	194	G.FYNPAVSRI.V			533.785	2	1066.56	1066.57	0	-5.4	379	Non	274.16	89.39	89.39	7.17	3	>tr|Q8BMS7|Q8BMS7_MOUSE Calcium-transporting ATPase OS=Mus musculus OX=10090 GN=Atp2c1 PE=1 SV=1	1894	controllerType=0 controllerNumber=1 scan=14659	70.5633
09027:4	194	L.AVAAIPEGLPIVVTV.T			362.975	4	1448.88	1448.87	0	3.4	285	Non	63.87	23.74	23.74	1.84	3	>tr|Q8BMS7|Q8BMS7_MOUSE Calcium-transporting ATPase OS=Mus musculus OX=10090 GN=Atp2c1 PE=1 SV=1	1894	controllerType=0 controllerNumber=1 scan=18085	81.6254
06463:2	110	K.NYVNGKTFL.E			528.277	2	1055.55	1055.55	0	-5.5	115	CRagged	337.65	90.12	90.12	7.51	2	>tr|Q8BKE0|Q8BKE0_MOUSE Proteasome endopeptidase complex (Fragment) OS=Mus musculus OX=10090 GN=Psma2 PE=1 SV=1	1073	controllerType=0 controllerNumber=1 scan=14064	69.1818
05239:2	110	N.YVNGKTFL.E			471.255	2	941.503	941.509	0	-6	116	Non	266.12	11.38	11.38	3.98	2	>tr|Q8BKE0|Q8BKE0_MOUSE Proteasome endopeptidase complex (Fragment) OS=Mus musculus OX=10090 GN=Psma2 PE=1 SV=1	1073	controllerType=0 controllerNumber=1 scan=12228	64.2113
07245:2	130	R.IYKGVIQAI.Q			502.807	2	1004.61	1004.61	0	-6.3	239	CRagged	370.29	110.97	110.97	8.3	1	>tr|Q8BHF5|Q8BHF5_MOUSE Reticulon OS=Mus musculus OX=10090 GN=Rtn4 PE=1 SV=1	4823	controllerType=0 controllerNumber=1 scan=15642	75.5707
10489:2	121	R.VYESLISHI.Q			530.783	2	1060.56	1060.57	0	-8.9	586	CRagged	381.42	143.09	143.09	8.43	3	>tr|Q7TT21|Q7TT21_MOUSE Tuberin OS=Mus musculus OX=10090 GN=Tsc2 PE=1 SV=1	3661	controllerType=0 controllerNumber=1 scan=19961	85.7505
08342:1	121	K.VLIF.T			491.319	1	491.319	491.323	0	-7.1	721	CRagged	66.84	66.84	66.84	1.91	3	>tr|Q7TT21|Q7TT21_MOUSE Tuberin OS=Mus musculus OX=10090 GN=Tsc2 PE=1 SV=1	3661	controllerType=0 controllerNumber=1 scan=17215	79.7316
12059:2	335	S.GFLPGLRTV.T			480.284	2	959.561	959.567	0	-6.6	20	Non	280.02	34.21	34.21	3.12	1	>tr|Q7TMG8|Q7TMG8_MOUSE Glioblastoma amplified sequence OS=Mus musculus OX=10090 GN=Nipsnap2 PE=1 SV=1	272	controllerType=0 controllerNumber=1 scan=21976	90.2392
06716:2	41	M.ALRYPM[+15.995]AVGLN.K		M[+16]	610.822	2	1220.64	1220.65	0	-6.6	2	Non	373.44	127.11	127.11	9.47	2	>tr|Q6ZWZ4|Q6ZWZ4_MOUSE 60S ribosomal protein L36 OS=Mus musculus OX=10090 GN=Rpl36 PE=1 SV=1	5874	controllerType=0 controllerNumber=1 scan=14384	69.8244
09540:2	41	M.ALRYPMAVGLN.K			602.823	2	1204.64	1204.65	0	-9.4	2	Non	184.81	24.87	24.87	2.82	2	>tr|Q6ZWZ4|Q6ZWZ4_MOUSE 60S ribosomal protein L36 OS=Mus musculus OX=10090 GN=Rpl36 PE=1 SV=1	5874	controllerType=0 controllerNumber=1 scan=18727	82.988
04924:2	407	R.IGAEVYHNL.K			508.26	2	1015.51	1015.52	0	-7.1	116	CRagged	275.15	75.1	75.1	1.56	1	>tr|Q6PHC1|Q6PHC1_MOUSE Alpha-enolase OS=Mus musculus OX=10090 GN=Eno1 PE=1 SV=1	2086	controllerType=0 controllerNumber=1 scan=11743	62.8101
08279:2	38	D.SYAAISEVDRL.Q			612.311	2	1223.62	1223.63	0	-9.4	93	Non	484.94	220.08	220.08	10.88	1	>tr|Q6PFA2|Q6PFA2_MOUSE Clathrin light chain OS=Mus musculus OX=10090 GN=Clta PE=1 SV=1	4020	controllerType=0 controllerNumber=1 scan=17138	79.584
05627:2	358	H.KYLPSSDEF.S			543.258	2	1085.51	1085.52	0	-6.3	188	Non	283.89	39.42	39.42	2.19	1	>tr|Q6P6L6|Q6P6L6_MOUSE Gem (Nuclear organelle) associated protein 4 OS=Mus musculus OX=10090 GN=Gemin4 PE=1 SV=1	1781	controllerType=0 controllerNumber=1 scan=12808	65.7611
07463:2	182	R.RYLQLTQSEL.S			625.838	2	1250.67	1250.67	0	-4.6	85	CRagged	358.82	123.1	123.1	7.37	1	>tr|Q6P3Y6|Q6P3Y6_MOUSE Tetratricopeptide repeat protein 9C OS=Mus musculus OX=10090 GN=Ttc9c PE=1 SV=1	4413	controllerType=0 controllerNumber=1 scan=16070	77.1976
04096:2	330	V.SYSNIKNGLV.K			547.793	2	1094.58	1094.58	0	-5.8	449	Non	251.25	34.53	34.53	2.78	2	>tr|Q6NXL1|Q6NXL1_MOUSE Sec24-related gene family, member D (S. cerevisiae) OS=Mus musculus OX=10090 GN=Sec24d PE=1 SV=1	3650	controllerType=0 controllerNumber=1 scan=10569	59.7885
05201:2	330	L.HFFNVKSNL.A			553.289	2	1105.57	1105.58	0	-7.4	495	Non	241.28	37.34	37.34	1.37	2	>tr|Q6NXL1|Q6NXL1_MOUSE Sec24-related gene family, member D (S. cerevisiae) OS=Mus musculus OX=10090 GN=Sec24d PE=1 SV=1	3650	controllerType=0 controllerNumber=1 scan=12172	64.0511
06567:2	204	E.DYQALRTSI.D			533.776	2	1066.54	1066.55	0	-7.9	1480	Non	330.58	69.2	69.2	7	2	>tr|Q5SXR6|Q5SXR6_MOUSE Clathrin heavy chain OS=Mus musculus OX=10090 GN=Cltc PE=1 SV=1	33956	controllerType=0 controllerNumber=1 scan=14197	69.4542
04560:2	4	G.RSSGPYGGGGQYF.A			666.797	2	1332.59	1332.6	0	-6.9	337	Non	338.99	173.75	173.75	10.5	4	>tr|Q5EBP8|Q5EBP8_MOUSE Heterogeneous nuclear ribonucleoprotein A1 OS=Mus musculus OX=10090 GN=Hnrnpa1 PE=1 SV=1	27755	controllerType=0 controllerNumber=1 scan=11253	61.6611
07747:2	4	R.SSGPYGGGGQYF.A			588.747	2	1176.49	1176.5	0	-6.8	338	CRagged	400.85	247.38	247.38	9.65	4	>tr|Q5EBP8|Q5EBP8_MOUSE Heterogeneous nuclear ribonucleoprotein A1 OS=Mus musculus OX=10090 GN=Hnrnpa1 PE=1 SV=1	27755	controllerType=0 controllerNumber=1 scan=16455	78.1144
02324:2	4	S.SNFGPM[+15.995]KGGNFGG.R		M[+16]	643.281	2	1285.55	1285.56	0	-6.5	324	Non	181.72	95.24	95.24	5.5	4	>tr|Q5EBP8|Q5EBP8_MOUSE Heterogeneous nuclear ribonucleoprotein A1 OS=Mus musculus OX=10090 GN=Hnrnpa1 PE=1 SV=1	27755	controllerType=0 controllerNumber=1 scan=7930	52.3447
10417:2	4	N.FGGGGSYNDFGNY.N			677.764	2	1354.52	1354.53	0	-9.3	307	Non	113.46	9.11	9.11	3.39	4	>tr|Q5EBP8|Q5EBP8_MOUSE Heterogeneous nuclear ribonucleoprotein A1 OS=Mus musculus OX=10090 GN=Hnrnpa1 PE=1 SV=1	27755	controllerType=0 controllerNumber=1 scan=19867	85.5357
03959:2	90	N.HGGGYMNAGAGYGSY.G			731.292	2	1461.58	1461.59	0	-5.2	662	Non	192.22	82	82	5.95	3	>tr|Q45VK5|Q45VK5_MOUSE Interleukin enhancer-binding factor 3 OS=Mus musculus OX=10090 GN=Ilf3 PE=1 SV=1	4601	controllerType=0 controllerNumber=1 scan=10384	59.3832
00288:2	90	N.HGGGYM[+15.995]NAGAGYGS.Y		M[+16]	657.757	2	1314.51	1314.52	0	-7.9	662	Non	155.17	120.12	120.12	5.48	3	>tr|Q45VK5|Q45VK5_MOUSE Interleukin enhancer-binding factor 3 OS=Mus musculus OX=10090 GN=Ilf3 PE=1 SV=1	4601	controllerType=0 controllerNumber=1 scan=4015	35.4705
11704:2	103	S.LYQEVFGRL.R			562.803	2	1124.6	1124.61	0	-9.3	398	Non	349.32	112.7	112.7	8.67	1	>tr|Q3V3M1|Q3V3M1_MOUSE Endoplasmic reticulum membrane sensor NFE2L1 OS=Mus musculus OX=10090 GN=Nfe2l1 PE=1 SV=1	4460	controllerType=0 controllerNumber=1 scan=21528	89.2979
09185:2	297	R.TYFFGATHV.P			521.749	2	1042.49	1042.5	0	-9.2	212	CRagged	295.76	110.1	110.1	5.69	3	>tr|Q3V0A7|Q3V0A7_MOUSE RIKEN cDNA 4930402H24 gene OS=Mus musculus OX=10090 GN=4930402H24Rik PE=1 SV=1	4806	controllerType=0 controllerNumber=1 scan=18280	82.0298
08661:2	302	G.FSLEMNAFGD.L			565.741	2	1130.48	1130.48	0	-5.9	73	Non	249.92	84.48	84.48	5.56	1	>tr|Q3ULP7|Q3ULP7_MOUSE Cathepsin L-like 3 OS=Mus musculus OX=10090 GN=Ctsll3 PE=2 SV=1	27580	controllerType=0 controllerNumber=1 scan=17625	80.6487
06889:2	193	G.SFTDVRTAI.Y			505.266	2	1009.53	1009.53	0	-5.8	285	Non	346.92	81.62	81.62	6.53	2	>tr|Q3UHL6|Q3UHL6_MOUSE Fibronectin OS=Mus musculus OX=10090 GN=Fn1 PE=1 SV=1	2090	controllerType=0 controllerNumber=1 scan=14605	70.2826
03042:2	193	K.TGPM[+15.995]KEINL.S		M[+16]	509.762	2	1018.52	1018.52	0	-6.6	1761	CRagged	256.38	6.7	6.7	3.41	2	>tr|Q3UHL6|Q3UHL6_MOUSE Fibronectin OS=Mus musculus OX=10090 GN=Fn1 PE=1 SV=1	2090	controllerType=0 controllerNumber=1 scan=9018	55.5528
00282:3	146	N.HNVQGFHPYR.R			418.872	3	1254.6	1254.61	0	-8	396	NRagged	378.59	242.4	242.4	7.75	2	>tr|Q3UGB5|Q3UGB5_MOUSE DAZ associated protein 1, isoform CRA_b OS=Mus musculus OX=10090 GN=Dazap1 PE=1 SV=1	2096	controllerType=0 controllerNumber=1 scan=3994	35.328
00960:2	146	N.HNVQGFHPY.R			549.756	2	1098.5	1098.51	0	-6.5	396	Non	177.4	76.1	76.1	2.83	2	>tr|Q3UGB5|Q3UGB5_MOUSE DAZ associated protein 1, isoform CRA_b OS=Mus musculus OX=10090 GN=Dazap1 PE=1 SV=1	2096	controllerType=0 controllerNumber=1 scan=5726	44.7466
06327:2	147	K.TYNPAFSRL.E			534.774	2	1068.54	1068.55	0	-6.4	166	CRagged	359.24	114.57	114.57	7.99	1	>tr|Q3U3W2|Q3U3W2_MOUSE Transmembrane protein 181A OS=Mus musculus OX=10090 GN=Tmem181a PE=1 SV=1	1820	controllerType=0 controllerNumber=1 scan=13872	68.7184
04561:2	143	S.TYLSSLKGSRL.H			612.846	2	1224.69	1224.69	0	-7.5	355	Non	327.69	140.99	140.99	8.03	1	>tr|Q3TYF1|Q3TYF1_MOUSE NGFI-A-binding protein 2 OS=Mus musculus OX=10090 GN=Nab2 PE=1 SV=1	1627	controllerType=0 controllerNumber=1 scan=11254	61.663
06280:2	307	S.KYNLPLTKI.T			545.333	2	1089.66	1089.67	0	-6.6	187	Non	255.8	58.59	58.59	5.43	3	>tr|Q3TWH3|Q3TWH3_MOUSE MCG12570 OS=Mus musculus OX=10090 GN=Pnrc1 PE=1 SV=1	5221	controllerType=0 controllerNumber=1 scan=13811	68.5996
05482:2	111	S.SFNEAM[+15.995]TQI.R		M[+16]	528.734	2	1056.46	1056.47	0	-5.8	575	Non	364.23	100.11	100.11	8.19	1	>tr|Q3TTL2|Q3TTL2_MOUSE Kinesin-like protein OS=Mus musculus OX=10090 GN=Kif2c PE=1 SV=1	4868	controllerType=0 controllerNumber=1 scan=12609	65.3094
07756:2	310	Q.TYDYAKTIL.S			544.284	2	1087.56	1087.57	0	-6.7	316	Non	278.93	70.16	70.16	5.4	1	>tr|Q3TS02|Q3TS02_MOUSE ATP-citrate synthase OS=Mus musculus OX=10090 GN=Acly PE=1 SV=1	1868	controllerType=0 controllerNumber=1 scan=16467	78.1397
10661:2	294	L.LYDPVISKL.A			524.304	2	1047.6	1047.61	0	-8.2	166	Non	288.25	30.07	30.07	5.77	1	>tr|Q3TJY1|Q3TJY1_MOUSE Microspherule protein 1 OS=Mus musculus OX=10090 GN=Mcrs1 PE=1 SV=1	28714	controllerType=0 controllerNumber=1 scan=20177	86.2305
10821:2	393	G.FFSTIRTEL.Y			557.295	2	1113.58	1113.59	0	-9.2	163	Non	250.66	11.88	11.88	1.72	1	>tr|Q3TJI8|Q3TJI8_MOUSE Corticosteroid 11-beta-dehydrogenase isozyme 1 OS=Mus musculus OX=10090 GN=Hsd11b1 PE=1 SV=1	1182	controllerType=0 controllerNumber=1 scan=20378	86.6629
03947:2	431	G.KYIPLPQRV.R			557.339	2	1113.67	1113.68	0	-6.5	260	Non	249.47	11.57	11.57	1.3	1	>tr|Q3TGG2|Q3TGG2_MOUSE Ataxin-2-like protein OS=Mus musculus OX=10090 GN=Atxn2l PE=1 SV=1	3053	controllerType=0 controllerNumber=1 scan=10370	59.3582
05358:2	160	R.SYLIIHQRI.H			571.833	2	1142.66	1142.67	0	-7.8	646	CRagged	378.95	177.41	177.41	7.85	1	>tr|Q3TFZ4|Q3TFZ4_MOUSE Zinc finger protein 7 OS=Mus musculus OX=10090 GN=Zfp7 PE=1 SV=1	1240	controllerType=0 controllerNumber=1 scan=12421	64.799
06397:2	21	N.TYITSVSRL.Y			520.29	2	1039.57	1039.58	0	-6	240	Non	350.17	130.64	130.64	9.35	2	>tr|Q3TEE9|Q3TEE9_MOUSE Oxidative stress-induced growth inhibitor family member 2 OS=Mus musculus OX=10090 GN=Osgin2 PE=2 SV=1	5920	controllerType=0 controllerNumber=1 scan=13966	68.9158
08575:2	21	N.TYITSVSRLY.R			601.819	2	1202.63	1202.64	0	-8.8	240	Non	257.95	93.72	93.72	7.25	2	>tr|Q3TEE9|Q3TEE9_MOUSE Oxidative stress-induced growth inhibitor family member 2 OS=Mus musculus OX=10090 GN=Osgin2 PE=2 SV=1	5920	controllerType=0 controllerNumber=1 scan=17515	80.3871
06461:2	127	N.LYQPTGGQL.L			488.755	2	976.503	976.51	0	-6.7	502	Non	357.39	109.07	109.07	8.35	1	>tr|Q3TBA3|Q3TBA3_MOUSE Antigen peptide transporter 1 OS=Mus musculus OX=10090 GN=Tap1 PE=1 SV=1	5356	controllerType=0 controllerNumber=1 scan=14062	69.1783
04022:2	134	G.SRPAQSWTAVTPQ.Q			714.861	2	1428.71	1428.72	0	-5.7	363	Non	296.08	68.02	68.02	8.29	1	>tr|Q0VAW6|Q0VAW6_MOUSE RIKEN cDNA 8030462N17 gene OS=Mus musculus OX=10090 GN=8030462N17Rik PE=1 SV=1	1803	controllerType=0 controllerNumber=1 scan=10466	59.5522
06939:2	114	K.SYIEGSVHL.F			502.753	2	1004.5	1004.5	0	-6.1	23	CRagged	370.26	161.95	161.95	8.54	1	>tr|M0QWH8|M0QWH8_MOUSE Eukaryotic translation elongation factor 1 beta 2 OS=Mus musculus OX=10090 GN=Eef1b2 PE=1 SV=1	33234	controllerType=0 controllerNumber=1 scan=14725	70.8227
07122:2	219	L.KFTETLTNI.W			533.789	2	1066.57	1066.58	0	-6.7	1987	Non	349.66	69.06	69.06	6.78	1	>tr|L7N451|L7N451_MOUSE Interferon-induced very large GTPase 1 OS=Mus musculus OX=10090 GN=Gvin1 PE=1 SV=1	5024	controllerType=0 controllerNumber=1 scan=15127	72.5603
10089:2	48	K.VGADLTHVF.C			479.75	2	958.492	958.499	0	-7	117	CRagged	386.9	141.5	141.5	8.59	2	>tr|K3W4M4|K3W4M4_MOUSE ATP-dependent (S)-NAD(P)H-hydrate dehydratase OS=Mus musculus OX=10090 GN=Naxd PE=1 SV=1	14863	controllerType=0 controllerNumber=1 scan=19445	84.609
04647:2	48	V.VGPGLGRDDL.L			499.764	2	998.52	998.527	0	-6	168	Non	233.46	56.26	56.26	4.57	2	>tr|K3W4M4|K3W4M4_MOUSE ATP-dependent (S)-NAD(P)H-hydrate dehydratase OS=Mus musculus OX=10090 GN=Naxd PE=1 SV=1	14863	controllerType=0 controllerNumber=1 scan=11373	61.9515
08381:2	333	G.SYIKDLSVV.H			512.286	2	1023.57	1023.57	0	-6.6	34	Non	298.74	10.14	10.14	3.12	1	>tr|J3QPC9|J3QPC9_MOUSE CTD nuclear envelope phosphatase 1 (Fragment) OS=Mus musculus OX=10090 GN=Ctdnep1 PE=1 SV=1	25548	controllerType=0 controllerNumber=1 scan=17268	79.8549
03766:2	85	G.SYHTDINM[+15.995]L.Y		M[+16]	555.247	2	1109.49	1109.49	0	-5.5	918	Non	342.69	102.09	102.09	6.59	3	>tr|J3QNW0|J3QNW0_MOUSE DNA (cytosine-5)-methyltransferase OS=Mus musculus OX=10090 GN=Dnmt1 PE=1 SV=1	4498	controllerType=0 controllerNumber=1 scan=10104	58.6359
07111:2	85	S.SGPFRTITV.R			489.271	2	977.534	977.541	0	-7.6	1243	Non	332.46	39.71	39.71	4.99	3	>tr|J3QNW0|J3QNW0_MOUSE DNA (cytosine-5)-methyltransferase OS=Mus musculus OX=10090 GN=Dnmt1 PE=1 SV=1	4498	controllerType=0 controllerNumber=1 scan=15072	72.2126
07126:2	85	G.SYHTDINML.Y			547.249	2	1093.49	1093.5	0	-6.2	918	Non	234.39	12.57	12.57	1.62	3	>tr|J3QNW0|J3QNW0_MOUSE DNA (cytosine-5)-methyltransferase OS=Mus musculus OX=10090 GN=Dnmt1 PE=1 SV=1	4498	controllerType=0 controllerNumber=1 scan=15164	72.8156
13248:2	375	A.SFQPTLNSL.V			503.76	2	1006.51	1006.52	0	-8.3	137	Non	310.83	18.85	18.85	2	1	>tr|J3QMY1|J3QMY1_MOUSE ATP-dependent DNA helicase Q5 OS=Mus musculus OX=10090 GN=Recql5 PE=1 SV=1	5975	controllerType=0 controllerNumber=1 scan=23490	93.5968
06719:2	69	H.THVNDGTEFGGSIY.Q			748.831	2	1496.66	1496.67	0	-6.5	183	Non	257.21	138.98	138.98	9.04	2	>tr|J3QMG3|J3QMG3_MOUSE Voltage-dependent anion-selective channel protein 3 OS=Mus musculus OX=10090 GN=Vdac3 PE=1 SV=1	12743	controllerType=0 controllerNumber=1 scan=14387	69.8314
06724:2	69	T.HVNDGTEFGGSIY.Q			698.308	2	1395.61	1395.62	0	-5.7	184	Non	183.75	37.02	37.02	2.97	2	>tr|J3QMG3|J3QMG3_MOUSE Voltage-dependent anion-selective channel protein 3 OS=Mus musculus OX=10090 GN=Vdac3 PE=1 SV=1	12743	controllerType=0 controllerNumber=1 scan=14394	69.8478
09385:2	223	Q.TYHVSFETL.A			548.764	2	1096.52	1096.53	0	-8.4	257	Non	326.05	54.12	54.12	6.67	1	>tr|J3QM82|J3QM82_MOUSE MCG16947 OS=Mus musculus OX=10090 GN=Phlpp2 PE=1 SV=1	2758	controllerType=0 controllerNumber=1 scan=18532	82.5669
12715:2	361	V.TILLGGPGVGLP.R			547.33	2	1093.65	1093.66	0	-7.7	24	Non	240.76	40.53	40.53	2.13	1	>tr|J3JS95|J3JS95_MOUSE Novel protein OS=Mus musculus OX=10090 GN=Fam3a PE=1 SV=1	3853	controllerType=0 controllerNumber=1 scan=22793	91.9936
03288:2	169	I.EYVHTKNFI.H			575.795	2	1150.58	1150.59	0	-6.2	125	Non	382.86	112.86	112.86	7.75	1	>tr|H7BXB1|H7BXB1_MOUSE Casein kinase I isoform alpha OS=Mus musculus OX=10090 GN=Csnk1a1 PE=1 SV=1	8772	controllerType=0 controllerNumber=1 scan=9370	56.5104
15367:2	317	R.TVFSGSVSIP.S			497.262	2	993.516	993.525	0	-8.7	1512	CRagged	357.58	36.5	36.5	5.34	2	>tr|H7BX44|H7BX44_MOUSE Non-specific serine/threonine protein kinase OS=Mus musculus OX=10090 GN=Cdc42bpa PE=1 SV=1	7226	controllerType=0 controllerNumber=1 scan=26396	100.863
02396:2	317	K.GCPASTGFPPK.R			531.254	2	1061.5	1061.51	0	-8.1	905	Specific	111.53	46.13	46.13	1.81	2	>tr|H7BX44|H7BX44_MOUSE Non-specific serine/threonine protein kinase OS=Mus musculus OX=10090 GN=Cdc42bpa PE=1 SV=1	7226	controllerType=0 controllerNumber=1 scan=8036	52.6484
13737:2	122	P.SYFEIPTKEF.Q			630.806	2	1260.61	1260.61	0	-7.4	238	Non	346.65	46.65	46.65	8.46	2	>tr|H7BX26|H7BX26_MOUSE Centrosomal protein of 170 kDa OS=Mus musculus OX=10090 GN=Cep170 PE=1 SV=1	5061	controllerType=0 controllerNumber=1 scan=24127	95.0399
12512:2	318	M.YYLPLGKTL.K			534.307	2	1067.61	1067.61	0	-6.8	132	Non	266.98	27.41	27.41	5.35	1	>tr|H7BWZ9|H7BWZ9_MOUSE Protein dopey-1 OS=Mus musculus OX=10090 GN=Dopey1 PE=1 SV=1	4829	controllerType=0 controllerNumber=1 scan=22539	91.4117
12228:2	279	A.GYLGQVTTI.K			476.257	2	951.507	951.515	0	-7.6	57	Non	349.17	67.43	67.43	5.99	1	>tr|H3BLM2|H3BLM2_MOUSE SUMO-activating enzyme subunit 2 (Fragment) OS=Mus musculus OX=10090 GN=Uba2 PE=1 SV=1	14511	controllerType=0 controllerNumber=1 scan=22187	90.6913
08223:2	366	T.IYSIYPKSEL.L			606.824	2	1212.64	1212.65	0	-7.8	323	Non	251.56	25.75	25.75	2.08	2	>tr|H3BL03|H3BL03_MOUSE AP-4 complex subunit epsilon-1 OS=Mus musculus OX=10090 GN=Ap4e1 PE=1 SV=1	31782	controllerType=0 controllerNumber=1 scan=17069	79.4496
04688:2	232	C.AYAPSGNYV.A			471.218	2	941.429	941.436	0	-7.4	104	Non	328.18	78.06	78.06	6.58	1	>tr|H3BKR2|H3BKR2_MOUSE Guanine nucleotide-binding protein G(I)/G(S)/G(T) subunit beta-1 (Fragment) OS=Mus musculus OX=10090 GN=Gnb1 PE=1 SV=8	6127	controllerType=0 controllerNumber=1 scan=11429	62.0827
11183:2	1	S.VPDSSGPERILSI.S			685.364	2	1369.72	1369.73	0	-7.9	78	Non	443.43	223.8	223.8	11.99	5	>tr|H3BKD0|H3BKD0_MOUSE Heterogeneous nuclear ribonucleoprotein K (Fragment) OS=Mus musculus OX=10090 GN=Hnrnpk PE=1 SV=1	9657	controllerType=0 controllerNumber=1 scan=20834	87.6557
10150:2	1	V.PDSSGPERILSI.S			635.832	2	1270.66	1270.66	0	-6.2	79	Non	512.13	231.15	231.15	11.12	5	>tr|H3BKD0|H3BKD0_MOUSE Heterogeneous nuclear ribonucleoprotein K (Fragment) OS=Mus musculus OX=10090 GN=Hnrnpk PE=1 SV=1	9657	controllerType=0 controllerNumber=1 scan=19529	84.8104
07387:2	1	S.SGPERILSI.S			486.277	2	971.546	971.552	0	-6.2	82	Non	325.55	28.02	28.02	5.1	5	>tr|H3BKD0|H3BKD0_MOUSE Heterogeneous nuclear ribonucleoprotein K (Fragment) OS=Mus musculus OX=10090 GN=Hnrnpk PE=1 SV=1	9657	controllerType=0 controllerNumber=1 scan=15931	76.7075
11392:2	1	P.DSSGPERILSI.S			587.306	2	1173.6	1173.61	0	-5.7	80	Non	289.4	35.29	35.29	5.05	5	>tr|H3BKD0|H3BKD0_MOUSE Heterogeneous nuclear ribonucleoprotein K (Fragment) OS=Mus musculus OX=10090 GN=Hnrnpk PE=1 SV=1	9657	controllerType=0 controllerNumber=1 scan=21114	88.3067
06623:2	321	A.SFGKLIRSI.F			510.811	2	1020.61	1020.62	0	-5.4	199	Non	291.38	66.82	66.82	5.28	1	>tr|G5E890|G5E890_MOUSE Transcription factor RFX3 OS=Mus musculus OX=10090 GN=Rfx3 PE=1 SV=1	35114	controllerType=0 controllerNumber=1 scan=14264	69.5721
12758:2	179	D.VYWKIYNSI.Y			593.313	2	1185.62	1185.63	0	-9.3	1264	Non	278.34	52.29	52.29	5.87	3	>tr|G5E866|G5E866_MOUSE Splicing factor 3B subunit 1 OS=Mus musculus OX=10090 GN=Sf3b1 PE=1 SV=1	2509	controllerType=0 controllerNumber=1 scan=22849	92.1186
04574:2	179	A.GYVPIRTP.A			451.755	2	902.503	902.509	0	-7.3	420	Non	270.85	0.02	0.02	4.57	3	>tr|G5E866|G5E866_MOUSE Splicing factor 3B subunit 1 OS=Mus musculus OX=10090 GN=Sf3b1 PE=1 SV=1	2509	controllerType=0 controllerNumber=1 scan=11271	61.6975
07217:2	313	A.GYFPTGRYV.M			530.263	2	1059.52	1059.53	0	-5.9	529	Non	251.08	81.93	81.93	5.4	1	>tr|G3X9Z8|G3X9Z8_MOUSE Innate immunity activator protein OS=Mus musculus OX=10090 GN=Inava PE=1 SV=1	26964	controllerType=0 controllerNumber=1 scan=15559	75.1498
05247:2	263	P.SYIYGAQHL.L			526.26	2	1051.51	1051.52	0	-7	298	Non	285.18	56.29	56.29	6.19	1	>tr|G3X992|G3X992_MOUSE MSL3-like 2 OS=Mus musculus OX=10090 GN=Msl3l2 PE=4 SV=1	27897	controllerType=0 controllerNumber=1 scan=12241	64.2531
08706:2	7	K.FYNQVSTPLLR.N			669.359	2	1337.71	1337.72	0	-8.1	493	Specific	445.6	269.55	269.55	9.33	4	>tr|G3X977|G3X977_MOUSE Inter-alpha trypsin inhibitor, heavy chain 2 OS=Mus musculus OX=10090 GN=Itih2 PE=1 SV=1	5871	controllerType=0 controllerNumber=1 scan=17683	80.7788
16373:2	7	K.FYNQVSTPLL.R			591.308	2	1181.61	1181.62	0	-8.9	493	CRagged	353.75	48.7	48.7	7.24	4	>tr|G3X977|G3X977_MOUSE Inter-alpha trypsin inhibitor, heavy chain 2 OS=Mus musculus OX=10090 GN=Itih2 PE=1 SV=1	5871	controllerType=0 controllerNumber=1 scan=27823	104.596
06498:2	7	K.KFYNQVSTPL.L			598.816	2	1196.62	1196.63	0	-5	492	CRagged	284.52	70.8	70.8	5.59	4	>tr|G3X977|G3X977_MOUSE Inter-alpha trypsin inhibitor, heavy chain 2 OS=Mus musculus OX=10090 GN=Itih2 PE=1 SV=1	5871	controllerType=0 controllerNumber=1 scan=14113	69.297
10122:2	7	K.FYNQVSTPL.L			534.768	2	1068.53	1068.54	0	-6.5	493	CRagged	331.29	32.37	32.37	5.26	4	>tr|G3X977|G3X977_MOUSE Inter-alpha trypsin inhibitor, heavy chain 2 OS=Mus musculus OX=10090 GN=Itih2 PE=1 SV=1	5871	controllerType=0 controllerNumber=1 scan=19494	84.7433
07500:2	123	T.AYAIIKEEL.D			525.294	2	1049.58	1049.59	0	-7	1058	Non	351.95	43.3	43.3	6.95	2	>tr|G3X963|G3X963_MOUSE ATPase family AAA domain-containing protein 2 OS=Mus musculus OX=10090 GN=Atad2 PE=1 SV=1	26661	controllerType=0 controllerNumber=1 scan=16131	77.3831
06519:2	123	I.VGPTLKATF.T			467.27	2	933.533	933.54	0	-7.9	842	Non	279.23	36.19	36.19	4.46	2	>tr|G3X963|G3X963_MOUSE ATPase family AAA domain-containing protein 2 OS=Mus musculus OX=10090 GN=Atad2 PE=1 SV=1	26661	controllerType=0 controllerNumber=1 scan=14139	69.3495
11147:2	166	Q.DYIITPHAL.P			521.778	2	1042.55	1042.56	0	-8.7	531	Non	364.89	58	58	7.77	1	>tr|G3X934|G3X934_MOUSE MCG115964 OS=Mus musculus OX=10090 GN=Wdr70 PE=1 SV=1	5217	controllerType=0 controllerNumber=1 scan=20789	87.5635
05176:2	416	S.KGPEALQEF.Q			509.761	2	1018.51	1018.52	0	-6	37	Non	312.85	41.22	41.22	1.46	1	>tr|G3X8R5|G3X8R5_MOUSE Glutamine-rich protein 1 OS=Mus musculus OX=10090 GN=Qrich1 PE=1 SV=1	805	controllerType=0 controllerNumber=1 scan=12123	63.8663
07203:2	133	R.TYTWQIPER.S			597.298	2	1193.59	1193.59	0	-5.8	850	Specific	444.46	199.15	199.15	8.3	1	>tr|G3X8Q5|G3X8Q5_MOUSE Ceruloplasmin OS=Mus musculus OX=10090 GN=Cp PE=1 SV=1	2327	controllerType=0 controllerNumber=1 scan=15513	74.9052
07257:2	92	R.TYGLTPHYI.Y			532.771	2	1064.54	1064.54	0	-5.8	56	CRagged	380.42	136.67	136.67	8.81	1	>tr|G3UWX7|G3UWX7_MOUSE RNA-binding protein 38 (Fragment) OS=Mus musculus OX=10090 GN=Rbm38 PE=1 SV=1	20170	controllerType=0 controllerNumber=1 scan=15670	75.6969
08456:2	118	N.SSIRPVFGGSVY.R			634.832	2	1268.66	1268.66	0	-6	500	Non	290.97	102.8	102.8	8.52	1	>tr|G3UW86|G3UW86_MOUSE Protein regulator of cytokinesis 1 OS=Mus musculus OX=10090 GN=Prc1 PE=1 SV=1	1945	controllerType=0 controllerNumber=1 scan=17366	80.0717
07510:2	96	G.FYITSRTQF.N			581.795	2	1162.58	1162.59	0	-6.3	214	Non	334.46	114.28	114.28	8.78	1	>tr|F8WI90|F8WI90_MOUSE Tyrosine-protein kinase OS=Mus musculus OX=10090 GN=Src PE=1 SV=1	4457	controllerType=0 controllerNumber=1 scan=16147	77.4349
08296:2	43	H.DGPVRGIDF.H			488.244	2	975.48	975.489	0	-9.5	51	Non	309.45	75.32	75.32	6.41	5	>tr|F8WHL2|F8WHL2_MOUSE Coatomer subunit alpha OS=Mus musculus OX=10090 GN=Copa PE=1 SV=1	12282	controllerType=0 controllerNumber=1 scan=17159	79.6247
06587:2	43	R.KYDEVLHMV.R			567.282	2	1133.56	1133.57	0	-8.6	616	CRagged	282.74	105.6	105.6	5.14	5	>tr|F8WHL2|F8WHL2_MOUSE Coatomer subunit alpha OS=Mus musculus OX=10090 GN=Copa PE=1 SV=1	12282	controllerType=0 controllerNumber=1 scan=14221	69.4961
03405:2	43	M.SYNPAENAV.L			482.719	2	964.431	964.437	0	-6.6	369	Non	267.49	57.76	57.76	4.98	5	>tr|F8WHL2|F8WHL2_MOUSE Coatomer subunit alpha OS=Mus musculus OX=10090 GN=Copa PE=1 SV=1	12282	controllerType=0 controllerNumber=1 scan=9550	57.0563
04769:2	222	E.TYLVSKESI.T			520.284	2	1039.56	1039.57	0	-6.5	1121	Non	279.08	79.87	79.87	6.77	4	>tr|F8WGX5|F8WGX5_MOUSE DmX-like protein 1 OS=Mus musculus OX=10090 GN=Dmxl1 PE=1 SV=1	16651	controllerType=0 controllerNumber=1 scan=11530	62.2872
09593:2	32	T.GYSPQLQGL.S			481.748	2	962.488	962.494	0	-6.8	161	Non	405.18	57.93	57.93	8.3	2	>tr|F8WGT2|F8WGT2_MOUSE Transmembrane protein 209 OS=Mus musculus OX=10090 GN=Tmem209 PE=1 SV=1	12392	controllerType=0 controllerNumber=1 scan=18791	83.1137
04422:2	32	F.KYTVAPTSL.V			490.274	2	979.54	979.546	0	-5.5	87	Non	326.11	42.84	42.84	6.14	2	>tr|F8WGT2|F8WGT2_MOUSE Transmembrane protein 209 OS=Mus musculus OX=10090 GN=Tmem209 PE=1 SV=1	12392	controllerType=0 controllerNumber=1 scan=11056	61.1501
04894:2	343	A.EIIKDIHNL.E			547.811	2	1094.61	1094.62	0	-5.4	1579	Non	307.64	16.68	16.68	2.74	1	>tr|F8VQJ3|F8VQJ3_MOUSE Laminin subunit gamma-1 OS=Mus musculus OX=10090 GN=Lamc1 PE=1 SV=1	26282	controllerType=0 controllerNumber=1 scan=11703	62.7102
06419:4	326	R.GSGSTPTLTT[+79.966]TES[+79.966].S		S[+80], T[+80]	350.38	4	1398.5	1398.51	0	-6.8	1070	CRagged	118.65	118.65	2.4	2.34	1	>tr|F7C950|F7C950_MOUSE Uncharacterized protein OS=Mus musculus OX=10090 GN=Gm9573 PE=4 SV=2	17378	controllerType=0 controllerNumber=1 scan=13995	68.9845
05640:2	44	V.VFVAGATRI.S			467.277	2	933.546	933.552	0	-5.9	1169	Non	336.32	88.21	88.21	7.51	4	>tr|F7AC58|F7AC58_MOUSE Piezo-type mechanosensitive ion channel component OS=Mus musculus OX=10090 GN=Piezo1 PE=1 SV=2	9286	controllerType=0 controllerNumber=1 scan=12831	65.8402
07969:2	44	V.AGATRISIF.G			468.266	2	935.525	935.531	0	-6.3	1172	Non	287.77	21.33	21.33	5.09	4	>tr|F7AC58|F7AC58_MOUSE Piezo-type mechanosensitive ion channel component OS=Mus musculus OX=10090 GN=Piezo1 PE=1 SV=2	9286	controllerType=0 controllerNumber=1 scan=16738	78.7228
11636:2	44	A.SFSAVLTRI.Q			497.286	2	993.564	993.573	0	-9	789	Non	245.05	9.67	9.67	3.88	4	>tr|F7AC58|F7AC58_MOUSE Piezo-type mechanosensitive ion channel component OS=Mus musculus OX=10090 GN=Piezo1 PE=1 SV=2	9286	controllerType=0 controllerNumber=1 scan=21442	89.1035
10626:2	304	A.SYAEQLSM[+15.995]L.K		M[+16]	529.243	2	1057.48	1057.49	0	-8.1	61	Non	326.09	9.85	9.85	5.15	1	>tr|F6ZQA3|F6ZQA3_MOUSE Nuclear mitotic apparatus protein 1 (Fragment) OS=Mus musculus OX=10090 GN=Numa1 PE=1 SV=1	12797	controllerType=0 controllerNumber=1 scan=20135	86.1458
09640:2	245	R.AYLPPKELL.K			522.306	2	1043.6	1043.61	0	-9	207	CRagged	286.87	62.45	62.45	6.4	4	>tr|F6Z7L1|F6Z7L1_MOUSE Trinucleotide repeat-containing gene 18 protein (Fragment) OS=Mus musculus OX=10090 GN=Tnrc18 PE=1 SV=2	26147	controllerType=0 controllerNumber=1 scan=18853	83.2469
04848:2	15	Q.SQFTAPRDYSGY.Q			696.311	2	1391.61	1391.62	0	-6.4	174	Non	351.49	176.52	176.52	10.45	3	>tr|F6YP03|F6YP03_MOUSE Caprin-1 (Fragment) OS=Mus musculus OX=10090 GN=Caprin1 PE=1 SV=1	33596	controllerType=0 controllerNumber=1 scan=11642	62.5778
03265:2	15	N.TGFPRSSQPYYN.S			708.827	2	1416.65	1416.65	0	-5.6	115	Non	197.9	98.95	98.95	5.44	3	>tr|F6YP03|F6YP03_MOUSE Caprin-1 (Fragment) OS=Mus musculus OX=10090 GN=Caprin1 PE=1 SV=1	33596	controllerType=0 controllerNumber=1 scan=9333	56.3975
04690:2	15	N.TGFPRSSQPYY.N			651.804	2	1302.6	1302.61	0	-7.5	115	Non	227.8	85.19	85.19	5.21	3	>tr|F6YP03|F6YP03_MOUSE Caprin-1 (Fragment) OS=Mus musculus OX=10090 GN=Caprin1 PE=1 SV=1	33596	controllerType=0 controllerNumber=1 scan=11432	62.0888
07878:2	153	R.SVTRPAFLY.N			527.286	2	1053.56	1053.57	0	-8.2	20	CRagged	362.67	96.73	96.73	7.38	3	>tr|F6XV67|F6XV67_MOUSE RIKEN cDNA 2410004B18 gene (Fragment) OS=Mus musculus OX=10090 GN=2410004B18Rik PE=1 SV=1	17887	controllerType=0 controllerNumber=1 scan=16617	78.4397
13523:2	153	R.SVTRPAFLYNPLN.K			746.395	2	1491.78	1491.8	0	-8.2	20	CRagged	167.21	26.55	26.55	3.33	3	>tr|F6XV67|F6XV67_MOUSE RIKEN cDNA 2410004B18 gene (Fragment) OS=Mus musculus OX=10090 GN=2410004B18Rik PE=1 SV=1	17887	controllerType=0 controllerNumber=1 scan=23848	94.4205
08174:2	153	R.SVTRPAFLYNP.L			632.834	2	1264.66	1264.67	0	-6.5	20	CRagged	154.63	4.64	4.64	1.7	3	>tr|F6XV67|F6XV67_MOUSE RIKEN cDNA 2410004B18 gene (Fragment) OS=Mus musculus OX=10090 GN=2410004B18Rik PE=1 SV=1	17887	controllerType=0 controllerNumber=1 scan=17008	79.3249
10055:2	271	V.SYLDTQVGHVL.S			616.314	2	1231.62	1231.63	0	-8.8	196	Non	246.36	72.65	72.65	6.09	1	>tr|F6X9C5|F6X9C5_MOUSE Iduronate 2-sulfatase (Fragment) OS=Mus musculus OX=10090 GN=Ids PE=1 SV=8	17596	controllerType=0 controllerNumber=1 scan=19399	84.5014
04440:2	65	S.YYINGKTGL.E			514.771	2	1028.54	1028.54	0	-5.7	1181	Non	349.75	123.87	123.87	9.4	4	>tr|F6WJB7|F6WJB7_MOUSE Ubiquitin carboxyl-terminal hydrolase 34 (Fragment) OS=Mus musculus OX=10090 GN=Usp34 PE=1 SV=1	35901	controllerType=0 controllerNumber=1 scan=11083	61.2191
08059:2	428	D.RYLPGETFV.L			541.284	2	1081.56	1081.57	0	-6	140	Non	238.69	57.41	57.41	1.33	1	>tr|F6UK33|F6UK33_MOUSE Polycomb protein SCMH1 (Fragment) OS=Mus musculus OX=10090 GN=Scmh1 PE=1 SV=1	9149	controllerType=0 controllerNumber=1 scan=16858	79.0038
07986:2	247	G.SYGKLFESV.E			515.262	2	1029.52	1029.53	0	-7.5	430	Non	305.11	48.56	48.56	6.41	1	>tr|F6TZU3|F6TZU3_MOUSE Gigaxonin (Fragment) OS=Mus musculus OX=10090 GN=Gan PE=1 SV=1	19969	controllerType=0 controllerNumber=1 scan=16764	78.7943
07488:2	383	C.SGAIRLDTF.R			490.261	2	979.515	979.521	0	-6	204	Non	280.28	7.8	7.8	1.95	1	>tr|F6RUL9|F6RUL9_MOUSE Phosphoribosylformylglycinamidine synthase (Fragment) OS=Mus musculus OX=10090 GN=Pfas PE=1 SV=1	19855	controllerType=0 controllerNumber=1 scan=16113	77.3413
05869:2	91	N.SQPSLKLTGNLQ.N			643.355	2	1285.7	1285.71	0	-6	380	Non	282.5	102.94	102.94	8.85	1	>tr|F6QHD1|F6QHD1_MOUSE Protein LYRIC (Fragment) OS=Mus musculus OX=10090 GN=Mtdh PE=1 SV=2	11630	controllerType=0 controllerNumber=1 scan=13184	66.8376
07411:2	228	S.KYFGGVTAL.S			478.263	2	955.519	955.525	0	-6.5	230	Non	307.65	89.82	89.82	6.59	1	>tr|F2Z3X1|F2Z3X1_MOUSE Beta-1,4-galactosyltransferase 4 OS=Mus musculus OX=10090 GN=B4galt4 PE=1 SV=1	12411	controllerType=0 controllerNumber=1 scan=15969	76.8152
10610:2	347	R.TEPVGKVLL.G			478.296	2	955.584	955.582	0	2.2	329	CRagged	342.95	64.38	64.38	2.54	1	>tr|F2Z3W8|F2Z3W8_MOUSE Synaptotagmin-8 OS=Mus musculus OX=10090 GN=Syt8 PE=4 SV=1	29075	controllerType=0 controllerNumber=1 scan=20115	86.102
06312:2	178	E.IYKDSSTFL.K			537.276	2	1073.54	1073.55	0	-6.3	99	Non	346.75	102.09	102.09	7.51	2	>tr|E9QPC5|E9QPC5_MOUSE N6-adenosine-methyltransferase non-catalytic subunit OS=Mus musculus OX=10090 GN=Mettl14 PE=1 SV=2	21453	controllerType=0 controllerNumber=1 scan=13855	68.6917
11158:2	6	I.DIADYKESFNTI.S			708.333	2	1415.66	1415.67	0	-6.9	255	Non	275.36	85.13	85.13	7.84	5	>tr|E9QMF0|E9QMF0_MOUSE Grainyhead-like protein 1 homolog OS=Mus musculus OX=10090 GN=Grhl1 PE=4 SV=1	30618	controllerType=0 controllerNumber=1 scan=20802	87.5886
06901:2	6	A.DYKESFNTI.S			558.76	2	1116.51	1116.52	0	-6.4	258	Non	381.43	105.93	105.93	7.24	5	>tr|E9QMF0|E9QMF0_MOUSE Grainyhead-like protein 1 homolog OS=Mus musculus OX=10090 GN=Grhl1 PE=4 SV=1	30618	controllerType=0 controllerNumber=1 scan=14649	70.5279
05690:2	6	I.ADYKESFNTI.S			594.279	2	1187.55	1187.56	0	-5.5	257	Non	294.49	94.8	94.8	7.11	5	>tr|E9QMF0|E9QMF0_MOUSE Grainyhead-like protein 1 homolog OS=Mus musculus OX=10090 GN=Grhl1 PE=4 SV=1	30618	controllerType=0 controllerNumber=1 scan=12919	66.1303
10533:2	6	G.GSYKLTLTEI.-			562.81	2	1124.61	1124.62	0	-6.9	527	Non	262.62	50.22	50.22	4.52	5	>tr|E9QMF0|E9QMF0_MOUSE Grainyhead-like protein 1 homolog OS=Mus musculus OX=10090 GN=Grhl1 PE=4 SV=1	30618	controllerType=0 controllerNumber=1 scan=20017	85.8698
10885:2	6	G.SYKLTLTEI.-			534.298	2	1067.59	1067.6	0	-8.8	528	Non	259.59	43.39	43.39	3.51	5	>tr|E9QMF0|E9QMF0_MOUSE Grainyhead-like protein 1 homolog OS=Mus musculus OX=10090 GN=Grhl1 PE=4 SV=1	30618	controllerType=0 controllerNumber=1 scan=20462	86.8567
05975:2	71	D.YYTNSLEKL.R			565.787	2	1130.57	1130.57	0	-6.3	1048	Non	346.89	129.56	129.56	9.35	3	>tr|E9QMD3|E9QMD3_MOUSE Zinc finger homeobox protein 3 OS=Mus musculus OX=10090 GN=Zfhx3 PE=1 SV=1	5678	controllerType=0 controllerNumber=1 scan=13350	67.3277
05643:2	348	M.FDVTNATTF.S			508.237	2	1015.47	1015.47	0	-5.7	88	Non	255.33	61.74	61.74	2.52	1	>tr|E9QLQ7|E9QLQ7_MOUSE Ras-related protein Rab-7L1 OS=Mus musculus OX=10090 GN=Rab29 PE=1 SV=1	4263	controllerType=0 controllerNumber=1 scan=12836	65.8567
10488:2	108	Q.SYLNSVQQL.V			526.27	2	1051.53	1051.54	0	-8.5	173	Non	398.83	95.49	95.49	8.56	1	>tr|E9QL43|E9QL43_MOUSE Nucleoporin-like protein 2 OS=Mus musculus OX=10090 GN=Nupl2 PE=1 SV=1	11478	controllerType=0 controllerNumber=1 scan=19960	85.7487
08752:2	312	S.NYFESKGIL.E			535.776	2	1070.54	1070.55	0	-7.2	287	Non	252.2	45.22	45.22	5.4	1	>tr|E9QKL6|E9QKL6_MOUSE Interferon-activable protein 204 OS=Mus musculus OX=10090 GN=Ifi204 PE=1 SV=1	29480	controllerType=0 controllerNumber=1 scan=17740	80.9001
16306:2	39	K.EYQEIITEL.R			569.283	2	1137.56	1137.57	0	-7	1241	CRagged	405.81	90.41	90.41	7.91	5	>tr|E9QKK1|E9QKK1_MOUSE Centromere-associated protein E OS=Mus musculus OX=10090 GN=Cenpe PE=1 SV=1	11002	controllerType=0 controllerNumber=1 scan=27745	104.474
14808:2	39	E.YQEIITEL.R			504.762	2	1008.52	1008.52	0	-7	1242	Non	313.51	17.98	17.98	4.68	5	>tr|E9QKK1|E9QKK1_MOUSE Centromere-associated protein E OS=Mus musculus OX=10090 GN=Cenpe PE=1 SV=1	11002	controllerType=0 controllerNumber=1 scan=25623	98.9423
11835:2	39	E.IYNETITDL.L			541.27	2	1081.53	1081.54	0	-7.4	134	Non	270.43	29.64	29.64	3.55	5	>tr|E9QKK1|E9QKK1_MOUSE Centromere-associated protein E OS=Mus musculus OX=10090 GN=Cenpe PE=1 SV=1	11002	controllerType=0 controllerNumber=1 scan=21687	89.6227
02063:2	346	N.TKSLDNNYSTLNE.R			749.849	2	1498.69	1498.7	0	-7.8	837	Non	203.84	81.1	81.1	2.54	1	>tr|E9Q8Z9|E9Q8Z9_MOUSE Catenin delta-1 OS=Mus musculus OX=10090 GN=Ctnnd1 PE=1 SV=1	3583	controllerType=0 controllerNumber=1 scan=7555	51.2824
05658:2	156	G.TYTNTLERL.V			555.79	2	1110.57	1110.58	0	-5.9	654	Non	346.47	81.5	81.5	7.9	2	>tr|E9Q839|E9Q839_MOUSE SMC5-SMC6 complex localization factor protein 2 OS=Mus musculus OX=10090 GN=Slf2 PE=1 SV=1	11649	controllerType=0 controllerNumber=1 scan=12865	65.9634
05541:2	264	Q.VYIPTYSKP.N			534.288	2	1067.57	1067.58	0	-6.9	337	Non	283.75	66.17	66.17	6.19	1	>tr|E9Q794|E9Q794_MOUSE Metastasis-associated protein MTA3 OS=Mus musculus OX=10090 GN=Mta3 PE=1 SV=1	6092	controllerType=0 controllerNumber=1 scan=12701	65.571
09291:2	329	T.AYLEDRPLSM[+15.995]L.Y		M[+16]	662.33	2	1323.65	1323.66	0	-6.7	548	Non	242.33	39.76	39.76	2.8	1	>tr|E9Q600|E9Q600_MOUSE Lysyl oxidase homolog 4 OS=Mus musculus OX=10090 GN=Loxl4 PE=1 SV=1	14401	controllerType=0 controllerNumber=1 scan=18414	82.3141
11282:2	216	K.NYGFTIRAI.R			527.783	2	1054.56	1054.57	0	-8.8	889	CRagged	314.03	103.97	103.97	6.8	2	>tr|E9Q4Q9|E9Q4Q9_MOUSE Microtubule-associated serine/threonine-protein kinase 4 (Fragment) OS=Mus musculus OX=10090 GN=Mast4 PE=1 SV=1	6439	controllerType=0 controllerNumber=1 scan=20965	87.961
07181:2	56	A.SYNLTVREL.K			547.793	2	1094.58	1094.58	0	-5.4	161	Non	413.33	127.98	127.98	9.7	1	>tr|E9Q3Y4|E9Q3Y4_MOUSE Lipopolysaccharide-responsive and beige-like anchor protein OS=Mus musculus OX=10090 GN=Lrba PE=1 SV=1	15510	controllerType=0 controllerNumber=1 scan=15420	74.3615
05522:2	22	L.VGPELHDRLL.S			574.821	2	1148.63	1148.64	0	-6.8	3592	Non	326.55	84.95	84.95	7.67	10	>tr|E9Q3W4|E9Q3W4_MOUSE Plectin OS=Mus musculus OX=10090 GN=Plec PE=1 SV=1	2653	controllerType=0 controllerNumber=1 scan=12676	65.5215
05304:2	22	V.VGPELHEKLL.S			567.826	2	1134.65	1134.65	0	-5.8	3257	Non	244.49	45.94	45.94	4.84	10	>tr|E9Q3W4|E9Q3W4_MOUSE Plectin OS=Mus musculus OX=10090 GN=Plec PE=1 SV=1	2653	controllerType=0 controllerNumber=1 scan=12344	64.6077
05796:2	22	G.VYLPGSRQTL.T			567.316	2	1133.62	1133.63	0	-6.1	3534	Non	275.94	42.54	42.54	4.76	10	>tr|E9Q3W4|E9Q3W4_MOUSE Plectin OS=Mus musculus OX=10090 GN=Plec PE=1 SV=1	2653	controllerType=0 controllerNumber=1 scan=13068	66.4838
05191:2	22	E.SYSALM[+15.995]REL.E		M[+16]	543.264	2	1085.52	1085.53	0	-7.7	497	Non	274.97	22.01	22.01	3.88	10	>tr|E9Q3W4|E9Q3W4_MOUSE Plectin OS=Mus musculus OX=10090 GN=Plec PE=1 SV=1	2653	controllerType=0 controllerNumber=1 scan=12153	63.982
09430:2	22	R.HYQQLLQSL.E			565.298	2	1129.59	1129.6	0	-9.3	804	CRagged	291.35	19.34	19.34	3.46	10	>tr|E9Q3W4|E9Q3W4_MOUSE Plectin OS=Mus musculus OX=10090 GN=Plec PE=1 SV=1	2653	controllerType=0 controllerNumber=1 scan=18589	82.69
06387:2	22	I.VGPEFKDKLLSA.E			652.363	2	1303.72	1303.73	0	-5.1	3835	Non	209.97	61.29	61.29	3.33	10	>tr|E9Q3W4|E9Q3W4_MOUSE Plectin OS=Mus musculus OX=10090 GN=Plec PE=1 SV=1	2653	controllerType=0 controllerNumber=1 scan=13950	68.8726
05339:3	22	L.VGPELHEKLLSA.E			431.575	3	1292.71	1292.72	0	-7	2926	Non	113.01	23.19	23.19	2.81	10	>tr|E9Q3W4|E9Q3W4_MOUSE Plectin OS=Mus musculus OX=10090 GN=Plec PE=1 SV=1	2653	controllerType=0 controllerNumber=1 scan=12395	64.7421
06269:3	22	I.VGPEFKDKLL.S			382.555	3	1145.65	1145.66	0	-6.2	3835	Non	159.09	10.85	10.85	2.71	10	>tr|E9Q3W4|E9Q3W4_MOUSE Plectin OS=Mus musculus OX=10090 GN=Plec PE=1 SV=1	2653	controllerType=0 controllerNumber=1 scan=13798	68.5784
05700:2	359	E.KYVSM[+15.995]LQEL.S		M[+16]	563.79	2	1126.57	1126.58	0	-6.6	1275	Non	282.34	43.74	43.74	1.63	2	>tr|E9Q3P4|E9Q3P4_MOUSE Centromere protein F OS=Mus musculus OX=10090 GN=Cenpf PE=1 SV=1	30498	controllerType=0 controllerNumber=1 scan=12932	66.1589
12018:2	292	F.SYVTNIDM[+15.995]L.E		M[+16]	536.251	2	1071.49	1071.5	0	-7.4	624	Non	260.35	73.41	73.41	5.45	1	>tr|E9Q360|E9Q360_MOUSE Integrator complex subunit 10 OS=Mus musculus OX=10090 GN=Ints10 PE=1 SV=1	16710	controllerType=0 controllerNumber=1 scan=21921	90.1197
04214:2	281	M.SYLNDHVRI.H			558.79	2	1116.57	1116.58	0	-5.8	384	Non	303.21	74.76	74.76	5.97	1	>tr|E9Q2S7|E9Q2S7_MOUSE Zinc finger protein 266 OS=Mus musculus OX=10090 GN=Zfp266 PE=1 SV=1	1472	controllerType=0 controllerNumber=1 scan=10756	60.3697
10084:2	28	A.SNASSYLTSASSL.A			644.303	2	1287.6	1287.61	0	-6.1	1766	Non	309.06	140.4	140.4	9.17	2	>tr|E9Q2H1|E9Q2H1_MOUSE E3 ubiquitin-protein ligase UBR5 OS=Mus musculus OX=10090 GN=Ubr5 PE=1 SV=2	7232	controllerType=0 controllerNumber=1 scan=19438	84.5898
09248:2	28	L.VYSQIPAAVKL.T			594.848	2	1188.69	1188.7	0	-8.6	1803	Non	242.92	62.11	62.11	6.42	2	>tr|E9Q2H1|E9Q2H1_MOUSE E3 ubiquitin-protein ligase UBR5 OS=Mus musculus OX=10090 GN=Ubr5 PE=1 SV=2	7232	controllerType=0 controllerNumber=1 scan=18361	82.2046
06925:2	336	G.AYLPQYTHM.Q			562.261	2	1123.52	1123.52	0	-7.4	376	Non	241	44.61	44.61	2.98	2	>tr|E9PZ21|E9PZ21_MOUSE RNA-binding motif, single-stranded-interacting protein 1 OS=Mus musculus OX=10090 GN=Rbms1 PE=1 SV=1	16333	controllerType=0 controllerNumber=1 scan=14699	70.7307
05293:2	82	C.FYQPM[+15.995]PLKA.S		M[+16]	555.783	2	1110.56	1110.57	0	-6.2	48	Non	243.06	52.56	52.56	5.99	2	>tr|E9PXY3|E9PXY3_MOUSE Transmembrane emp24 domain-containing protein 5 OS=Mus musculus OX=10090 GN=Tmed5 PE=1 SV=1	30427	controllerType=0 controllerNumber=1 scan=12321	64.5154
05660:2	82	K.KYITNTDVL.E			533.788	2	1066.57	1066.58	0	-8	141	CRagged	309.57	116.49	116.49	5.69	2	>tr|E9PXY3|E9PXY3_MOUSE Transmembrane emp24 domain-containing protein 5 OS=Mus musculus OX=10090 GN=Tmed5 PE=1 SV=1	30427	controllerType=0 controllerNumber=1 scan=12868	65.9698
06890:2	165	H.NYVPGKFTV.S			512.774	2	1024.54	1024.55	0	-5.4	394	Non	306.03	97.2	97.2	7.71	3	>tr|E9PXX8|E9PXX8_MOUSE Metastasis-associated in colon cancer 1 OS=Mus musculus OX=10090 GN=Macc1 PE=1 SV=1	26918	controllerType=0 controllerNumber=1 scan=14622	70.4052
05760:2	165	N.YVPGKFTV.S			455.752	2	910.497	910.503	0	-7.3	395	Non	196.39	0.76	0.76	1.97	3	>tr|E9PXX8|E9PXX8_MOUSE Metastasis-associated in colon cancer 1 OS=Mus musculus OX=10090 GN=Macc1 PE=1 SV=1	26918	controllerType=0 controllerNumber=1 scan=13017	66.3653
10025:2	165	N.YGVALKTVL.R			482.294	2	963.58	963.587	0	-7.3	552	Non	194.62	0.34	0.34	1.71	3	>tr|E9PXX8|E9PXX8_MOUSE Metastasis-associated in colon cancer 1 OS=Mus musculus OX=10090 GN=Macc1 PE=1 SV=1	26918	controllerType=0 controllerNumber=1 scan=19362	84.4218
05480:2	427	S.KYSTTSTFL.V			524.269	2	1047.53	1047.54	0	-5.4	50	Non	231.93	62.75	62.75	1.33	1	>tr|E9PXA4|E9PXA4_MOUSE N-alpha-acetyltransferase 20 (Fragment) OS=Mus musculus OX=10090 GN=Naa20 PE=1 SV=8	7131	controllerType=0 controllerNumber=1 scan=12603	65.2788
11090:2	286	E.IYNEVLRDL.L			567.807	2	1134.61	1134.62	0	-7.3	529	Non	255.57	56.87	56.87	5.87	1	>tr|E9PWU7|E9PWU7_MOUSE Kinesin-like protein OS=Mus musculus OX=10090 GN=Kifc3 PE=1 SV=1	14882	controllerType=0 controllerNumber=1 scan=20720	87.4169
05142:2	296	L.AYQVLAEKV.H			510.787	2	1020.57	1020.57	0	-6	228	Non	333.07	41.18	41.18	5.69	1	>tr|E9PWG6|E9PWG6_MOUSE Non-SMC condensin I complex, subunit G OS=Mus musculus OX=10090 GN=Ncapg PE=1 SV=1	14659	controllerType=0 controllerNumber=1 scan=12058	63.625
10604:2	387	E.LYTGTISQI.S			498.269	2	995.532	995.541	0	-9.2	2027	Non	290.19	42.02	42.02	2	6	>tr|E9PVY8|E9PVY8_MOUSE Microtubule-actin cross-linking factor 1 OS=Mus musculus OX=10090 GN=Macf1 PE=1 SV=2	7431	controllerType=0 controllerNumber=1 scan=20107	86.0846
07408:2	400	D.AGALRIEAL.R			457.273	2	913.539	913.547	0	-8.7	79	Non	308.76	24.64	24.64	1.67	2	>tr|E9PVW4|E9PVW4_MOUSE V-set and immunoglobulin domain-containing protein 10 OS=Mus musculus OX=10090 GN=Vsig10 PE=1 SV=1	14395	controllerType=0 controllerNumber=1 scan=15963	76.7972
04847:2	233	L.SYIHQRYIL.H			596.824	2	1192.64	1192.65	0	-5.6	227	Non	330.51	71.79	71.79	6.56	1	>tr|E9PVC7|E9PVC7_MOUSE Cyclin-dependent kinase 14 OS=Mus musculus OX=10090 GN=Cdk14 PE=1 SV=1	32610	controllerType=0 controllerNumber=1 scan=11641	62.5751
03902:2	145	Y.RYLPPATQV.V			522.793	2	1044.58	1044.58	0	-5.7	206	Non	341.02	97.47	97.47	7.97	1	>tr|E9PV04|E9PV04_MOUSE Uncharacterized protein OS=Mus musculus OX=10090 GN=Gm8994 PE=3 SV=2	3743	controllerType=0 controllerNumber=1 scan=10312	59.2235
07364:2	209	D.KYLQEMEDL.R			584.778	2	1168.55	1168.56	0	-5.9	398	Non	297.19	92.44	92.44	6.59	2	>tr|E9PUV9|E9PUV9_MOUSE Caspase recruitment domain-containing protein 10 OS=Mus musculus OX=10090 GN=Card10 PE=1 SV=1	12782	controllerType=0 controllerNumber=1 scan=15887	76.54
03358:2	209	D.KYLQEM[+15.995]EDL.R		M[+16]	592.775	2	1184.54	1184.55	0	-6.1	398	Non	225.64	42.36	42.36	2.82	2	>tr|E9PUV9|E9PUV9_MOUSE Caspase recruitment domain-containing protein 10 OS=Mus musculus OX=10090 GN=Card10 PE=1 SV=1	12782	controllerType=0 controllerNumber=1 scan=9479	56.8459
05592:2	171	A.SYLLSIHKV.Y			530.31	2	1059.61	1059.62	0	-7.4	982	Non	378.39	114.92	114.92	7.69	2	>tr|E9PUU4|E9PUU4_MOUSE Gem-associated protein 5 OS=Mus musculus OX=10090 GN=Gemin5 PE=1 SV=1	6637	controllerType=0 controllerNumber=1 scan=12763	65.6702
12551:2	424	G.KYVYLVTDL.M			557.309	2	1113.61	1113.62	0	-8	528	Non	261.33	42.09	42.09	1.4	1	>tr|E9PUP0|E9PUP0_MOUSE Ribosomal protein S6 kinase OS=Mus musculus OX=10090 GN=Rps6ka6 PE=1 SV=1	14978	controllerType=0 controllerNumber=1 scan=22587	91.5306
07297:2	115	K.KYLGQLTSI.P			511.795	2	1022.58	1022.59	0	-4.8	10	CRagged	396.98	127.12	127.12	8.54	1	>tr|E0CZ84|E0CZ84_MOUSE Cerebral cavernous malformations protein 2 homolog (Fragment) OS=Mus musculus OX=10090 GN=Ccm2 PE=1 SV=1	35283	controllerType=0 controllerNumber=1 scan=15745	75.9632
09977:2	217	F.YYGILQEKI.T			563.807	2	1126.61	1126.61	0	-6.1	27	Non	268.97	71.63	71.63	6.77	1	>tr|E0CXH1|E0CXH1_MOUSE Solute carrier family 35 member B1 OS=Mus musculus OX=10090 GN=Slc35b1 PE=4 SV=1	32072	controllerType=0 controllerNumber=1 scan=19302	84.2978
09207:2	391	L.LGPRIISSI.Q			478.296	2	955.586	955.593	0	-8.2	79	Non	257.2	3.75	3.75	1.72	1	>tr|D6RGT1|D6RGT1_MOUSE Phosphatidate cytidylyltransferase, mitochondrial OS=Mus musculus OX=10090 GN=Tamm41 PE=1 SV=1	15985	controllerType=0 controllerNumber=1 scan=18307	82.0827
09036:2	47	Q.SYLENPTSYHL.Q			662.308	2	1323.61	1323.62	0	-9.7	73	Non	398.57	206.31	206.31	10.21	1	>tr|D3Z6Q7|D3Z6Q7_MOUSE Transcription factor EB OS=Mus musculus OX=10090 GN=Tfeb PE=1 SV=1	14019	controllerType=0 controllerNumber=1 scan=18096	81.6464
04224:2	131	Q.SYKAGIYSV.E			494.258	2	987.508	987.515	0	-6.3	189	Non	350.79	106.38	106.38	8.3	1	>tr|D3Z647|D3Z647_MOUSE Ubiquitin-conjugating enzyme E2 Q2 OS=Mus musculus OX=10090 GN=Ube2q2 PE=1 SV=1	31828	controllerType=0 controllerNumber=1 scan=10769	60.3999
06309:2	328	G.HYISPFHDI.P			564.774	2	1128.54	1128.55	0	-6.2	53	Non	314.56	97.67	97.67	3.27	1	>tr|D3Z636|D3Z636_MOUSE Inorganic pyrophosphatase 2, mitochondrial OS=Mus musculus OX=10090 GN=Ppa2 PE=1 SV=1	21005	controllerType=0 controllerNumber=1 scan=13850	68.6781
07452:2	135	K.LYSLHPDPI.A			527.779	2	1054.55	1054.56	0	-6.1	32	CRagged	355.73	123.56	123.56	8.23	1	>tr|D3Z513|D3Z513_MOUSE Osteopontin (Fragment) OS=Mus musculus OX=10090 GN=Spp1 PE=1 SV=1	6379	controllerType=0 controllerNumber=1 scan=16051	77.1327
05858:2	370	K.HYLDQLNHI.L			576.789	2	1152.57	1152.58	0	-7.4	250	CRagged	270.01	85.72	85.72	2.04	2	>tr|D3Z3G6|D3Z3G6_MOUSE Mitogen-activated protein kinase OS=Mus musculus OX=10090 GN=Mapk3 PE=1 SV=1	8970	controllerType=0 controllerNumber=1 scan=13168	66.8012
06624:2	66	G.SYGTAPVNLNIK.A			638.845	2	1276.68	1276.69	0	-5.8	96	NRagged	384.76	201.56	201.56	9.34	1	>tr|D3Z3F1|D3Z3F1_MOUSE Pre-mRNA 3'-end-processing factor FIP1 (Fragment) OS=Mus musculus OX=10090 GN=Fip1l1 PE=1 SV=2	7221	controllerType=0 controllerNumber=1 scan=14265	69.5739
05535:2	345	S.SYKAIEAASSL.K			570.297	2	1139.59	1139.59	0	-7.4	571	Non	265.92	25.98	25.98	2.72	1	>tr|D3Z3E4|D3Z3E4_MOUSE Histone-lysine N-methyltransferase NSD2 OS=Mus musculus OX=10090 GN=Nsd2 PE=1 SV=1	6367	controllerType=0 controllerNumber=1 scan=12694	65.5585
09890:2	274	R.KYGVVLDEI.K			518.285	2	1035.56	1035.57	0	-8.7	65	CRagged	307.39	58.64	58.64	6.07	1	>tr|D3Z315|D3Z315_MOUSE Coatomer subunit epsilon (Fragment) OS=Mus musculus OX=10090 GN=Cope PE=1 SV=1	30622	controllerType=0 controllerNumber=1 scan=19178	83.9732
04344:2	402	E.KYEEVLHNL.E			572.8	2	1144.59	1144.6	0	-6.8	85	Non	241.68	57.57	57.57	1.6	1	>tr|D3Z2D4|D3Z2D4_MOUSE Caprin-2 (Fragment) OS=Mus musculus OX=10090 GN=Caprin2 PE=4 SV=1	31576	controllerType=0 controllerNumber=1 scan=10941	60.8451
09911:2	25	G.TYSIMIQKI.L			548.803	2	1096.6	1096.61	0	-7	494	Non	391.83	57.4	57.4	8.96	2	>tr|D3Z1H6|D3Z1H6_MOUSE Transient receptor potential cation channel subfamily V member 4 OS=Mus musculus OX=10090 GN=Trpv4 PE=1 SV=1	9296	controllerType=0 controllerNumber=1 scan=19205	84.029
07493:2	25	G.TYSIM[+15.995]IQKI.L		M[+16]	556.801	2	1112.6	1112.6	0	-6.3	494	Non	382.74	14.7	14.7	6.79	2	>tr|D3Z1H6|D3Z1H6_MOUSE Transient receptor potential cation channel subfamily V member 4 OS=Mus musculus OX=10090 GN=Trpv4 PE=1 SV=1	9296	controllerType=0 controllerNumber=1 scan=16121	77.3594
12366:2	388	K.DGSFEGLTVK.K			526.764	2	1052.52	1052.53	0	-5.5	646	Specific	289.73	62.19	62.19	1.95	1	>tr|D3Z0R8|D3Z0R8_MOUSE Tetratricopeptide repeat domain 7 OS=Mus musculus OX=10090 GN=Ttc7 PE=1 SV=1	19804	controllerType=0 controllerNumber=1 scan=22362	91.0617
07705:2	54	D.QYLFTKEQL.F			585.31	2	1169.61	1169.62	0	-6.7	509	Non	251.25	78.17	78.17	6.77	4	>tr|D3YZN4|D3YZN4_MOUSE Paraplegin OS=Mus musculus OX=10090 GN=Spg7 PE=1 SV=1	19191	controllerType=0 controllerNumber=1 scan=16400	77.9892
05847:2	54	L.KSPERFLQL.G			559.318	2	1117.63	1117.64	0	-6.9	224	Non	283.56	51.78	51.78	5.97	4	>tr|D3YZN4|D3YZN4_MOUSE Paraplegin OS=Mus musculus OX=10090 GN=Spg7 PE=1 SV=1	19191	controllerType=0 controllerNumber=1 scan=13154	66.7715
09778:2	54	K.SPERFLQL.G			495.27	2	989.533	989.541	0	-8.7	225	CRagged	223.69	0.37	0.37	1.42	4	>tr|D3YZN4|D3YZN4_MOUSE Paraplegin OS=Mus musculus OX=10090 GN=Spg7 PE=1 SV=1	19191	controllerType=0 controllerNumber=1 scan=19035	83.6579
11246:2	429	V.YYQGVIQQI.Q			556.288	2	1111.57	1111.58	0	-8.3	28	Non	274.76	21.72	21.72	1.31	1	>tr|D3YYB5|D3YYB5_MOUSE Uncharacterized protein (Fragment) OS=Mus musculus OX=10090 GN=Gm42791 PE=1 SV=1	11574	controllerType=0 controllerNumber=1 scan=20916	87.8429
16438:2	161	D.VYFPQISSV.K			520.272	2	1039.54	1039.55	0	-9.4	68	Non	348.8	53.63	53.63	7.84	1	>tr|D3YWY9|D3YWY9_MOUSE Synaptogyrin-1 (Fragment) OS=Mus musculus OX=10090 GN=Syngr1 PE=4 SV=1	9207	controllerType=0 controllerNumber=1 scan=27896	104.692
05964:2	129	G.AFQKTLSDL.Q			511.776	2	1022.55	1022.55	0	-6	115	Non	350.05	89.18	89.18	8.3	1	>tr|D3YVJ7|D3YVJ7_MOUSE Aldo-keto reductase family 1, member B3 (aldose reductase) (Fragment) OS=Mus musculus OX=10090 GN=Akr1b3 PE=1 SV=1	12395	controllerType=0 controllerNumber=1 scan=13335	67.2999
05597:2	411	R.KFFGDKTIV.P			527.796	2	1054.59	1054.59	0	-7.2	184	CRagged	325.61	33.22	33.22	1.52	1	>tr|B9EKI5|B9EKI5_MOUSE Casitas B-lineage lymphoma b OS=Mus musculus OX=10090 GN=Cblb PE=1 SV=1	27408	controllerType=0 controllerNumber=1 scan=12769	65.6805
07702:2	212	Y.GFLKSISNV.S			482.774	2	964.54	964.546	0	-6.6	502	Non	282.38	84.17	84.17	6.92	1	>tr|B9EJX5|B9EJX5_MOUSE TAF2 RNA polymerase II, TATA box binding protein (TBP)-associated factor OS=Mus musculus OX=10090 GN=Taf2 PE=1 SV=1	4907	controllerType=0 controllerNumber=1 scan=16396	77.9835
05806:2	342	R.PLTRLQLQ.E			484.795	2	968.582	968.589	0	-7	538	CRagged	270.83	14.04	14.04	2.76	1	>tr|B9EIX0|B9EIX0_MOUSE DCP1 decapping enzyme homolog b (S. cerevisiae) OS=Mus musculus OX=10090 GN=Dcp1b PE=1 SV=1	27123	controllerType=0 controllerNumber=1 scan=13084	66.5417
15414:2	113	V.TYTPM[+15.995]APGSYLI.S		M[+16]	665.317	2	1329.63	1329.64	0	-8.8	2478	Non	241.74	72.41	72.41	6.12	7	>tr|B7FAU9|B7FAU9_MOUSE Filamin, alpha OS=Mus musculus OX=10090 GN=Flna PE=1 SV=1	4856	controllerType=0 controllerNumber=1 scan=26455	100.984
08730:2	113	S.VFVDSLTKV.A			504.288	2	1007.57	1007.58	0	-9	2525	Non	246.4	30.91	30.91	3.88	7	>tr|B7FAU9|B7FAU9_MOUSE Filamin, alpha OS=Mus musculus OX=10090 GN=Flna PE=1 SV=1	4856	controllerType=0 controllerNumber=1 scan=17712	80.8373
02402:2	113	V.KYIPVQQGP.V			515.286	2	1029.56	1029.57	0	-8.4	936	Non	180.11	61.32	61.32	3.5	7	>tr|B7FAU9|B7FAU9_MOUSE Filamin, alpha OS=Mus musculus OX=10090 GN=Flna PE=1 SV=1	4856	controllerType=0 controllerNumber=1 scan=8046	52.6816
10328:2	113	V.TYTPM[+15.995]APGSYL.I		M[+16]	608.777	2	1216.55	1216.56	0	-6.8	2478	Non	170.86	36.55	36.55	3.11	7	>tr|B7FAU9|B7FAU9_MOUSE Filamin, alpha OS=Mus musculus OX=10090 GN=Flna PE=1 SV=1	4856	controllerType=0 controllerNumber=1 scan=19756	85.3095
12056:1	113	R.YSP.S			366.174	1	366.174	366.166	0	20.8	1824	CRagged	57.51	57.51	57.51	2.25	7	>tr|B7FAU9|B7FAU9_MOUSE Filamin, alpha OS=Mus musculus OX=10090 GN=Flna PE=1 SV=1	4856	controllerType=0 controllerNumber=1 scan=21973	90.232
00274:1	113	R.FVP.A			362.214	1	362.214	362.207	0	18.8	2194	CRagged	52.07	52.07	52.07	2.25	7	>tr|B7FAU9|B7FAU9_MOUSE Filamin, alpha OS=Mus musculus OX=10090 GN=Flna PE=1 SV=1	4856	controllerType=0 controllerNumber=1 scan=3963	35.1152
09366:2	117	D.SYVTIQNSEL.M			577.286	2	1153.56	1153.57	0	-7.8	636	Non	345.9	138.46	138.46	8.53	1	>tr|B2RXC6|B2RXC6_MOUSE DNA-directed RNA polymerase subunit OS=Mus musculus OX=10090 GN=Polr3a PE=1 SV=1	27384	controllerType=0 controllerNumber=1 scan=18509	82.5165
11079:2	344	T.KLLPSVTEL.F			500.304	2	999.601	999.609	0	-7	242	Non	273.69	32.07	32.07	2.74	2	>tr|B1Q2W7|B1Q2W7_MOUSE Transcription initiation factor TFIID subunit OS=Mus musculus OX=10090 GN=Taf1 PE=1 SV=1	4765	controllerType=0 controllerNumber=1 scan=20707	87.392
07586:2	175	K.EYQETIGQI.E			540.76	2	1080.51	1080.52	0	-6.9	200	CRagged	323.82	98.68	98.68	7.56	1	>tr|B1AZL1|B1AZL1_MOUSE Expressed sequence C79267 OS=Mus musculus OX=10090 GN=Iffo2 PE=3 SV=1	1676	controllerType=0 controllerNumber=1 scan=16248	77.6688
09225:2	231	D.VYQQTASLL.K			511.775	2	1022.54	1022.55	0	-8.1	103	Non	338.12	67.71	67.71	6.58	1	>tr|B1AWH1|B1AWH1_MOUSE Thiosulfate sulfurtransferase/rhodanese-like domain-containing protein 2 (Fragment) OS=Mus musculus OX=10090 GN=Tstd2 PE=1 SV=1	20914	controllerType=0 controllerNumber=1 scan=18332	82.1436
05227:2	301	A.GYIGSHTVL.E			473.75	2	946.493	946.499	0	-6.4	11	Non	297.8	66.05	66.05	5.6	1	>tr|B1AV53|B1AV53_MOUSE UDP-glucose 4-epimerase (Fragment) OS=Mus musculus OX=10090 GN=Gale PE=1 SV=1	6775	controllerType=0 controllerNumber=1 scan=12213	64.1771
04384:2	350	L.HYYETPTGI.K			540.749	2	1080.49	1080.5	0	-7.8	62	Non	253.54	61.77	61.77	2.51	1	>tr|B1ASW5|B1ASW5_MOUSE Trafficking protein particle complex 1, isoform CRA_a OS=Mus musculus OX=10090 GN=Trappc1 PE=1 SV=1	3999	controllerType=0 controllerNumber=1 scan=10998	60.9893
05484:2	9	M.DYLGSRQYV.H			550.769	2	1100.53	1100.54	0	-6.2	991	Non	386.72	121.52	121.52	9.09	4	>tr|B1ASP2|B1ASP2_MOUSE Tyrosine-protein kinase OS=Mus musculus OX=10090 GN=Jak1 PE=1 SV=1	303	controllerType=0 controllerNumber=1 scan=12618	65.3665
09651:2	9	V.KYLATLETL.T			526.301	2	1051.59	1051.6	0	-8.5	269	Non	433.17	88.22	88.22	8.21	4	>tr|B1ASP2|B1ASP2_MOUSE Tyrosine-protein kinase OS=Mus musculus OX=10090 GN=Jak1 PE=1 SV=1	303	controllerType=0 controllerNumber=1 scan=18866	83.2754
10520:2	9	W.SFGVTLHEL.L			501.762	2	1002.52	1002.53	0	-8.1	1065	Non	328.42	76.99	76.99	6.67	4	>tr|B1ASP2|B1ASP2_MOUSE Tyrosine-protein kinase OS=Mus musculus OX=10090 GN=Jak1 PE=1 SV=1	303	controllerType=0 controllerNumber=1 scan=20001	85.8354
13454:2	9	F.SYFPEITHI.V			553.774	2	1106.54	1106.55	0	-8.9	367	Non	219.48	9.21	9.21	2.8	4	>tr|B1ASP2|B1ASP2_MOUSE Tyrosine-protein kinase OS=Mus musculus OX=10090 GN=Jak1 PE=1 SV=1	303	controllerType=0 controllerNumber=1 scan=23761	94.2286
03524:2	132	I.EYIHSKNFI.H			575.794	2	1150.58	1150.59	0	-7.3	117	Non	423.48	127.6	127.6	8.3	1	>tr|A8Y2Z9|A8Y2Z9_MOUSE Casein kinase I isoform epsilon (Fragment) OS=Mus musculus OX=10090 GN=Csnk1e PE=1 SV=8	20355	controllerType=0 controllerNumber=1 scan=9728	57.5534
16214:2	98	L.SYFPTVNDI.K			528.252	2	1055.5	1055.5	0	-6.9	403	Non	369.61	133.1	133.1	8.76	1	>tr|A8VI08|A8VI08_MOUSE Calcium-responsive transcription factor OS=Mus musculus OX=10090 GN=Carf PE=2 SV=1	4772	controllerType=0 controllerNumber=1 scan=27572	103.833
12658:2	250	K.TTIPVKLFA.R			495.301	2	989.595	989.603	0	-8.5	160	CRagged	287.91	73.03	73.03	6.4	1	>tr|A2AU62|A2AU62_MOUSE RNA-binding protein Raly (Fragment) OS=Mus musculus OX=10090 GN=Raly PE=1 SV=1	17932	controllerType=0 controllerNumber=1 scan=22722	91.8388
07765:2	244	S.SFVNTM[+15.995]TSL.S		M[+16]	508.239	2	1015.47	1015.48	0	-5.4	468	Non	293.24	81.56	81.56	6.09	2	>tr|A2AS98|A2AS98_MOUSE Nck-associated protein 1 OS=Mus musculus OX=10090 GN=Nckap1 PE=1 SV=1	9117	controllerType=0 controllerNumber=1 scan=16477	78.1604
08390:2	371	Q.SYLKSELGL.G			505.278	2	1009.55	1009.56	0	-7.2	1053	Non	275.77	24.38	24.38	2	3	>tr|A2AQD5|A2AQD5_MOUSE Sperm-specific antigen 2 homolog OS=Mus musculus OX=10090 GN=Ssfa2 PE=1 SV=1	15549	controllerType=0 controllerNumber=1 scan=17279	79.8767
06379:2	128	D.VGPIVQHIY.E			513.289	2	1025.57	1025.58	0	-7.3	766	Non	287.2	149.86	149.86	8.31	2	>tr|A2AKI5|A2AKI5_MOUSE Integrin alpha-V OS=Mus musculus OX=10090 GN=Itgav PE=1 SV=1	12607	controllerType=0 controllerNumber=1 scan=13940	68.8534
07256:2	53	E.QYVSAFSKL.A			521.779	2	1042.55	1042.56	0	-5.1	235	Non	431.88	193.29	193.29	9.87	1	>tr|A2AG39|A2AG39_MOUSE Stomatin-like protein 2, mitochondrial (Fragment) OS=Mus musculus OX=10090 GN=Stoml2 PE=1 SV=1	6638	controllerType=0 controllerNumber=1 scan=15669	75.6933
07178:2	77	A.KYNPIGESVL.R			560.303	2	1119.6	1119.6	0	-5.9	439	Non	370.12	105.17	105.17	8.47	2	>tr|A2AE27|A2AE27_MOUSE AMP deaminase OS=Mus musculus OX=10090 GN=Ampd2 PE=1 SV=1	2557	controllerType=0 controllerNumber=1 scan=15394	74.1856
02974:2	77	A.KYNPIGESV.L			503.76	2	1006.51	1006.52	0	-8	439	Non	207.68	10.5	10.5	2.8	2	>tr|A2AE27|A2AE27_MOUSE AMP deaminase OS=Mus musculus OX=10090 GN=Ampd2 PE=1 SV=1	2557	controllerType=0 controllerNumber=1 scan=8910	55.2294
12014:2	199	N.QGASAAGPGFSLKF.-			669.341	2	1337.68	1337.68	0	-7.2	737	Non	257.51	97.54	97.54	7.13	1	>tr|A2A9P6|A2A9P6_MOUSE Cyclin-dependent kinase 11B OS=Mus musculus OX=10090 GN=Cdk11b PE=1 SV=1	12178	controllerType=0 controllerNumber=1 scan=21916	90.1111
16002:2	167	Q.EYLPSQITI.L			532.283	2	1063.56	1063.57	0	-8.7	277	Non	358.26	91.44	91.44	7.76	1	>tr|A2A5R6|A2A5R6_MOUSE NFX1-type zinc finger-containing protein 1 OS=Mus musculus OX=10090 GN=Znfx1 PE=1 SV=1	35963	controllerType=0 controllerNumber=1 scan=27278	103.118
04453:2	236	G.SYGSVYKAI.H			494.257	2	987.508	987.515	0	-7	39	Non	302.58	46.23	46.23	6.52	1	>tr|A2A5M9|A2A5M9_MOUSE Serine/threonine-protein kinase 4 (Fragment) OS=Mus musculus OX=10090 GN=Stk4 PE=1 SV=1	34183	controllerType=0 controllerNumber=1 scan=11101	61.2725
05934:2	70	T.IYRELEQSI.K			575.804	2	1150.6	1150.61	0	-7.5	93	Non	324.57	65.53	65.53	7.79	2	>tr|A0A2R8W6S4|A0A2R8W6S4_MOUSE Protein kinase C and casein kinase substrate in neurons protein 2 (Fragment) OS=Mus musculus OX=10090 GN=Pacsin2 PE=1 SV=1	14036	controllerType=0 controllerNumber=1 scan=13285	67.1372
03443:3	70	A.SYKTIYREL.E			391.546	3	1172.62	1172.63	0	-6.5	89	Non	214.63	72.11	72.11	4.49	2	>tr|A0A2R8W6S4|A0A2R8W6S4_MOUSE Protein kinase C and casein kinase substrate in neurons protein 2 (Fragment) OS=Mus musculus OX=10090 GN=Pacsin2 PE=1 SV=1	14036	controllerType=0 controllerNumber=1 scan=9603	57.1901
11910:2	392	E.VFQISRNLI.D			545.32	2	1089.63	1089.64	0	-8.8	72	Non	261.97	21.25	21.25	1.72	1	>tr|A0A2R8VHJ1|A0A2R8VHJ1_MOUSE Platelet-derived growth factor subunit B (Fragment) OS=Mus musculus OX=10090 GN=Pdgfb PE=1 SV=1	6310	controllerType=0 controllerNumber=1 scan=21780	89.8136
05801:2	380	S.SGSTRYISF.S			509.251	2	1017.49	1017.5	0	-6	9	Non	299.15	12.25	12.25	1.95	1	>tr|A0A2I3BS18|A0A2I3BS18_MOUSE E3 SUMO-protein ligase NSE2 OS=Mus musculus OX=10090 GN=Nsmce2 PE=1 SV=1	475	controllerType=0 controllerNumber=1 scan=13076	66.5203
08236:2	86	G.SYGSVFKAI.H			486.26	2	971.512	971.52	0	-8	35	Non	360.82	123.24	123.24	8.98	1	>tr|A0A2I3BQE0|A0A2I3BQE0_MOUSE Serine/threonine-protein kinase 3 OS=Mus musculus OX=10090 GN=Stk3 PE=1 SV=1	22700	controllerType=0 controllerNumber=1 scan=17085	79.4793
06146:2	99	S.QYSKVLNEL.T			547.294	2	1093.58	1093.59	0	-7.5	675	Non	336.44	155.51	155.51	8.76	1	>tr|A0A2I3BPY7|A0A2I3BPY7_MOUSE Ankycorbin OS=Mus musculus OX=10090 GN=Rai14 PE=1 SV=1	20587	controllerType=0 controllerNumber=1 scan=13612	68.0641
04565:2	266	V.KYIPSETDL.S			533.274	2	1065.54	1065.55	0	-6.1	189	Non	298.09	48.38	48.38	6.19	1	>tr|A0A286YEB1|A0A286YEB1_MOUSE Serine-rich coiled-coil domain-containing protein 2 OS=Mus musculus OX=10090 GN=Ccser2 PE=1 SV=1	22312	controllerType=0 controllerNumber=1 scan=11259	61.6721
08032:2	26	I.DVSYNAIRTGL.V			604.813	2	1208.62	1208.63	0	-6.6	435	Non	282.98	89.32	89.32	8.25	4	>tr|A0A286YDI8|A0A286YDI8_MOUSE Sec24-related gene family, member C (S. cerevisiae) OS=Mus musculus OX=10090 GN=Sec24c PE=1 SV=1	21657	controllerType=0 controllerNumber=1 scan=16824	78.9337
04109:2	26	V.SYNAIRTGL.V			497.766	2	994.525	994.532	0	-6.2	437	Non	330.34	78.07	78.07	7.9	4	>tr|A0A286YDI8|A0A286YDI8_MOUSE Sec24-related gene family, member C (S. cerevisiae) OS=Mus musculus OX=10090 GN=Sec24c PE=1 SV=1	21657	controllerType=0 controllerNumber=1 scan=10589	59.8494
06341:2	141	S.QGPVSKLTF.K			488.774	2	976.54	976.546	0	-6.4	38	Non	315.54	113.02	113.02	8.18	1	>tr|A0A286YCA7|A0A286YCA7_MOUSE Transmembrane protein 161B OS=Mus musculus OX=10090 GN=Tmem161b PE=1 SV=1	22678	controllerType=0 controllerNumber=1 scan=13889	68.7508
10080:2	186	D.HGVLLVGYGYEG.T			632.319	2	1263.63	1263.64	0	-5.1	132	Non	272.41	102.38	102.38	6.72	2	>tr|A0A1Y7VP49|A0A1Y7VP49_MOUSE Cathepsin L1 (Fragment) OS=Mus musculus OX=10090 GN=Ctsl PE=1 SV=1	26577	controllerType=0 controllerNumber=1 scan=19433	84.58
10433:2	186	D.HGVLLVGYGYEGT.D			682.84	2	1364.67	1364.68	0	-8.6	132	Non	183.9	23.29	23.29	3.44	2	>tr|A0A1Y7VP49|A0A1Y7VP49_MOUSE Cathepsin L1 (Fragment) OS=Mus musculus OX=10090 GN=Ctsl PE=1 SV=1	26577	controllerType=0 controllerNumber=1 scan=19886	85.5733
11803:2	68	A.EYIKVITGL.L			518.303	2	1035.6	1035.61	0	-9.3	1595	Non	328.94	127.48	127.48	9.28	2	>tr|A0A1Y7VLS3|A0A1Y7VLS3_MOUSE TOG array regulator of axonemal microtubules protein 1 OS=Mus musculus OX=10090 GN=Togaram1 PE=1 SV=1	7932	controllerType=0 controllerNumber=1 scan=21649	89.5445
11540:1	68	R.AAVV.C			359.235	1	359.235	359.229	0	15.5	1370	CRagged	73.34	73.34	73.34	2.25	2	>tr|A0A1Y7VLS3|A0A1Y7VLS3_MOUSE TOG array regulator of axonemal microtubules protein 1 OS=Mus musculus OX=10090 GN=Togaram1 PE=1 SV=1	7932	controllerType=0 controllerNumber=1 scan=21320	88.8313
07293:2	242	G.KYIAIVSTTV.E			547.824	2	1094.64	1094.65	0	-4.4	50	Non	312.07	99.76	99.76	6.39	3	>tr|A0A1Y7VLG4|A0A1Y7VLG4_MOUSE Rab GDP dissociation inhibitor (Fragment) OS=Mus musculus OX=10090 GN=Gdi2 PE=1 SV=1	24117	controllerType=0 controllerNumber=1 scan=15738	75.9457
08995:1	242	K.FVSI.S			465.278	1	465.278	465.271	0	16.5	82	CRagged	82.05	82.05	82.05	2.25	3	>tr|A0A1Y7VLG4|A0A1Y7VLG4_MOUSE Rab GDP dissociation inhibitor (Fragment) OS=Mus musculus OX=10090 GN=Gdi2 PE=1 SV=1	24117	controllerType=0 controllerNumber=1 scan=18044	81.5414
04723:2	242	G.KYIAIVST.T			447.765	2	894.523	894.529	0	-6.9	50	Non	199.19	9.16	9.16	1.82	3	>tr|A0A1Y7VLG4|A0A1Y7VLG4_MOUSE Rab GDP dissociation inhibitor (Fragment) OS=Mus musculus OX=10090 GN=Gdi2 PE=1 SV=1	24117	controllerType=0 controllerNumber=1 scan=11474	62.1793
16343:2	363	K.NYLPAINGI.V			487.765	2	974.522	974.53	0	-8.7	65	CRagged	279.57	62.93	62.93	2.1	1	>tr|A0A1W2P869|A0A1W2P869_MOUSE GTP-binding protein SAR1a (Fragment) OS=Mus musculus OX=10090 GN=Sar1a PE=1 SV=1	22836	controllerType=0 controllerNumber=1 scan=27789	104.546
07118:2	106	E.SYIGANVRL.R			496.777	2	992.547	992.552	0	-5.8	70	Non	362.4	120.07	120.07	8.62	1	>tr|A0A1W2P7Z9|A0A1W2P7Z9_MOUSE Vacuolar protein sorting-associated protein 26A (Fragment) OS=Mus musculus OX=10090 GN=Vps26a PE=1 SV=1	8498	controllerType=0 controllerNumber=1 scan=15104	72.4045
11850:2	184	S.GYLGNLSM[+15.995]V.T		M[+16]	485.235	2	969.463	969.471	0	-7.8	95	Non	323.28	99.16	99.16	6.98	1	>tr|A0A1W2P7R1|A0A1W2P7R1_MOUSE Nuclear pore complex protein Nup107 OS=Mus musculus OX=10090 GN=Nup107 PE=1 SV=1	24713	controllerType=0 controllerNumber=1 scan=21704	89.653
03891:2	158	R.SYIQIHERI.H			579.814	2	1158.62	1158.63	0	-5.6	427	CRagged	408.45	131.59	131.59	7.84	1	>tr|A0A1W2P7G7|A0A1W2P7G7_MOUSE cDNA sequence BC024063 OS=Mus musculus OX=10090 GN=BC024063 PE=4 SV=1	10156	controllerType=0 controllerNumber=1 scan=10294	59.1736
07110:2	19	D.DYNRIGSSLY.A			594.284	2	1187.56	1187.57	0	-6.4	128	Non	446.72	176.08	176.08	10.11	2	>tr|A0A1W2P701|A0A1W2P701_MOUSE Sorting nexin-6 OS=Mus musculus OX=10090 GN=Snx6 PE=1 SV=1	11265	controllerType=0 controllerNumber=1 scan=15068	72.1897
04621:2	19	D.DYNRIGSSL.Y			512.753	2	1024.5	1024.51	0	-7.5	128	Non	383.51	80.63	80.63	7.32	2	>tr|A0A1W2P701|A0A1W2P701_MOUSE Sorting nexin-6 OS=Mus musculus OX=10090 GN=Snx6 PE=1 SV=1	11265	controllerType=0 controllerNumber=1 scan=11335	61.8501
04865:2	324	S.EYNVTNNSI.A			527.242	2	1053.48	1053.48	0	-6.8	340	Non	345.23	11.17	11.17	3.28	1	>tr|A0A1W2P6Q8|A0A1W2P6Q8_MOUSE Predicted gene 9040 OS=Mus musculus OX=10090 GN=Gm9044 PE=4 SV=1	1082	controllerType=0 controllerNumber=1 scan=11665	62.6286
04152:2	238	A.AYSKLGNYV.G			507.763	2	1014.52	1014.53	0	-6.6	134	Non	288.63	71.61	71.61	6.52	2	>tr|A0A1W2P6P1|A0A1W2P6P1_MOUSE Small glutamine-rich tetratricopeptide repeat-containing protein alpha (Fragment) OS=Mus musculus OX=10090 GN=Sgta PE=1 SV=1	6362	controllerType=0 controllerNumber=1 scan=10656	60.0577
12746:2	168	I.SFFAAQNSI.S			492.739	2	984.47	984.479	0	-8.8	1083	Non	346.71	89.44	89.44	7.76	1	>tr|A0A1U6URG8|A0A1U6URG8_MOUSE Nuclear factor of-activated T-cells 5 OS=Mus musculus OX=10090 GN=Nfat5 PE=1 SV=1	12660	controllerType=0 controllerNumber=1 scan=22834	92.0901
12920:2	138	R.AYLNQTVTEF.K			593.288	2	1185.57	1185.58	0	-8	736	CRagged	343.41	159.63	159.63	8.21	1	>tr|A0A1L1SV73|A0A1L1SV73_MOUSE Ubiquitin carboxyl-terminal hydrolase 47 OS=Mus musculus OX=10090 GN=Usp47 PE=1 SV=1	31791	controllerType=0 controllerNumber=1 scan=23064	92.6361
03397:2	50	K.HTGPGILSM[+15.995]ANAGPN.T		M[+16]	726.844	2	1452.68	1452.69	0	-6.6	84	CRagged	293.71	130.56	130.56	9.59	1	>tr|A0A1L1SST0|A0A1L1SST0_MOUSE Peptidyl-prolyl cis-trans isomerase OS=Mus musculus OX=10090 GN=Ppia PE=1 SV=1	26608	controllerType=0 controllerNumber=1 scan=9539	57.0267
12023:2	268	E.AYNPSNGSWL.R			554.754	2	1108.5	1108.51	0	-5.5	340	Non	259.86	103.58	103.58	6.15	2	>tr|A0A1L1SS10|A0A1L1SS10_MOUSE Kelch-like ECH-associated protein 1 OS=Mus musculus OX=10090 GN=Keap1 PE=1 SV=1	5956	controllerType=0 controllerNumber=1 scan=21929	90.1442
08535:2	84	D.LYLKTENYL.G			578.811	2	1156.62	1156.62	0	-8.3	412	Non	305.47	67.6	67.6	7.19	2	>tr|A0A1L1SRX2|A0A1L1SRX2_MOUSE AMP deaminase OS=Mus musculus OX=10090 GN=Ampd3 PE=1 SV=1	8050	controllerType=0 controllerNumber=1 scan=17463	80.2587
03639:2	84	S.KYNPVGASEL.R			539.278	2	1077.55	1077.56	0	-7.4	400	Non	311.24	15.74	15.74	4.84	2	>tr|A0A1L1SRX2|A0A1L1SRX2_MOUSE AMP deaminase OS=Mus musculus OX=10090 GN=Ampd3 PE=1 SV=1	8050	controllerType=0 controllerNumber=1 scan=9888	57.9318
07468:2	282	S.SYREGLTPVL.S			567.807	2	1134.61	1134.62	0	-7.3	155	Non	281.99	3.64	3.64	5.96	1	>tr|A0A1L1SQ47|A0A1L1SQ47_MOUSE Synembryn-B (Fragment) OS=Mus musculus OX=10090 GN=Ric8b PE=1 SV=1	22301	controllerType=0 controllerNumber=1 scan=16082	77.248
06471:2	203	A.KYSSLYENL.G			558.779	2	1116.55	1116.56	0	-6	808	Non	309.94	77.09	77.09	6.97	3	>tr|A0A1D5RMI8|A0A1D5RMI8_MOUSE Alstrom syndrome protein 1 homolog OS=Mus musculus OX=10090 GN=Alms1 PE=1 SV=1	8778	controllerType=0 controllerNumber=1 scan=14077	69.2154
09030:1	203	K.LTST.V			421.225	1	421.225	421.229	0	-10.9	2472	CRagged	90.43	90.43	90.43	2.06	3	>tr|A0A1D5RMI8|A0A1D5RMI8_MOUSE Alstrom syndrome protein 1 homolog OS=Mus musculus OX=10090 GN=Alms1 PE=1 SV=1	8778	controllerType=0 controllerNumber=1 scan=18088	81.6326
03869:2	67	N.TVLSSGLTAAR.-			538.305	2	1075.6	1075.61	0	-6.8	111	NRagged	485.15	158.76	158.76	9.36	1	>tr|A0A1D5RM55|A0A1D5RM55_MOUSE Casein kinase II subunit alpha' (Fragment) OS=Mus musculus OX=10090 GN=Csnk2a2 PE=1 SV=1	23816	controllerType=0 controllerNumber=1 scan=10260	59.0753
08015:2	373	E.IYAPIREAL.R			523.302	2	1045.6	1045.6	0	-6.4	111	Non	276.18	41.54	41.54	2	2	>tr|A0A1D5RLG0|A0A1D5RLG0_MOUSE Inactive hydroxysteroid dehydrogenase-like protein 1 OS=Mus musculus OX=10090 GN=Hsdl1 PE=1 SV=1	23336	controllerType=0 controllerNumber=1 scan=16804	78.8931
04478:2	94	N.SAPPIPDSRLGEEN.K			741.361	2	1481.71	1481.72	0	-6.3	841	Non	241.44	87.22	87.22	8.8	1	>tr|A0A1D5RL92|A0A1D5RL92_MOUSE Calcium homeostasis endoplasmic reticulum protein OS=Mus musculus OX=10090 GN=Cherp PE=1 SV=1	356	controllerType=0 controllerNumber=1 scan=11138	61.3731
11592:2	300	Y.VYYQQLNTEL.K			635.814	2	1270.62	1270.63	0	-7.6	113	Non	245.19	74.15	74.15	5.64	1	>tr|A0A1B0GSP0|A0A1B0GSP0_MOUSE CD151 antigen (Fragment) OS=Mus musculus OX=10090 GN=Cd151 PE=3 SV=1	24061	controllerType=0 controllerNumber=1 scan=21388	88.9871
11090:2	287	E.IYNEVIRDL.L			567.807	2	1134.61	1134.62	0	-7.3	179	Non	255.57	56.87	56.87	5.87	1	>tr|A0A1B0GSG7|A0A1B0GSG7_MOUSE Kinesin-like protein OS=Mus musculus OX=10090 GN=Gm4869 PE=3 SV=1	13173	controllerType=0 controllerNumber=1 scan=20720	87.4169
06025:2	354	A.NYYGSLTQA.G			508.734	2	1016.46	1016.47	0	-7.8	97	Non	244.12	51.76	51.76	2.42	1	>tr|A0A1B0GS86|A0A1B0GS86_MOUSE Inositol-3-phosphate synthase 1 OS=Mus musculus OX=10090 GN=Isyna1 PE=1 SV=1	32665	controllerType=0 controllerNumber=1 scan=13423	67.519
03574:2	107	M.TQSPSSLSASLGER.V			710.351	2	1419.7	1419.71	0	-8.3	27	NRagged	305.52	182.59	182.59	8.59	1	>tr|A0A140T8N0|A0A140T8N0_MOUSE Immunoglobulin kappa chain variable 9-120 (Fragment) OS=Mus musculus OX=10090 GN=Igkv9-120 PE=1 SV=2	8690	controllerType=0 controllerNumber=1 scan=9806	57.7724
05131:2	288	Q.SYM[+15.995]PQQVTV.A		M[+16]	534.752	2	1068.5	1068.5	0	-6.7	311	Non	284.76	48.91	48.91	5.51	2	>tr|A0A140LJ04|A0A140LJ04_MOUSE Zinc finger ZZ-type and EF-hand domain-containing protein 1 OS=Mus musculus OX=10090 GN=Zzef1 PE=1 SV=1	12222	controllerType=0 controllerNumber=1 scan=12038	63.5578
08450:2	356	R.TIGSGFVITLT.D			554.818	2	1108.63	1108.62	0	2.7	27	CRagged	263.49	57.05	57.05	2.32	1	>tr|A0A0R4J1Y0|A0A0R4J1Y0_MOUSE DNA repair protein XRCC4 OS=Mus musculus OX=10090 GN=Xrcc4 PE=1 SV=1	24427	controllerType=0 controllerNumber=1 scan=17358	80.0481
07137:2	76	K.TYQDIQNTI.K			548.266	2	1095.52	1095.53	0	-7	698	CRagged	455.25	158.16	158.16	8.58	2	>tr|A0A0R4J0V5|A0A0R4J0V5_MOUSE DNA-directed RNA polymerase subunit OS=Mus musculus OX=10090 GN=Polr2a PE=1 SV=1	21667	controllerType=0 controllerNumber=1 scan=15201	73.0225
15225:2	76	L.FYSNIQTVI.N			542.783	2	1084.56	1084.57	0	-7.1	668	Non	229.58	64.2	64.2	3.51	2	>tr|A0A0R4J0V5|A0A0R4J0V5_MOUSE DNA-directed RNA polymerase subunit OS=Mus musculus OX=10090 GN=Polr2a PE=1 SV=1	21667	controllerType=0 controllerNumber=1 scan=26204	100.395
09408:2	395	A.SYVLTRVGL.S			504.294	2	1007.58	1007.59	0	-7.6	542	Non	260.8	16.07	16.07	1.72	1	>tr|A0A0R4J0L5|A0A0R4J0L5_MOUSE Conserved oligomeric Golgi complex subunit 6 OS=Mus musculus OX=10090 GN=Cog6 PE=1 SV=1	7504	controllerType=0 controllerNumber=1 scan=18562	82.6331
03344:2	384	V.DYIKGGTQL.N			497.76	2	994.514	994.52	0	-6.6	290	Non	314.58	42.31	42.31	1.95	1	>tr|A0A0R4J0J1|A0A0R4J0J1_MOUSE Copine-9 OS=Mus musculus OX=10090 GN=Cpne9 PE=1 SV=1	10972	controllerType=0 controllerNumber=1 scan=9454	56.7591
06183:2	355	C.KYLESLQY.R			522.271	2	1043.53	1043.54	0	-6.4	297	Non	293.47	28.63	28.63	2.32	1	>tr|A0A0R4J031|A0A0R4J031_MOUSE Tripartite motif-containing 35 OS=Mus musculus OX=10090 GN=Trim35 PE=1 SV=1	4115	controllerType=0 controllerNumber=1 scan=13666	68.2068
07412:2	188	T.YFLTTRQTL.C			571.81	2	1142.61	1142.62	0	-6.1	54	Non	283.59	64.91	64.91	7.31	1	>tr|A0A0R4J000|A0A0R4J000_MOUSE BTB/POZ domain-containing protein KCTD5 OS=Mus musculus OX=10090 GN=Kctd5 PE=1 SV=1	23437	controllerType=0 controllerNumber=1 scan=15971	76.8229
03774:2	64	A.SYYGGRGVGGI.K			543.269	2	1085.53	1085.54	0	-6.3	379	Non	329.51	136.11	136.11	9.42	2	>tr|A0A0N4SV16|A0A0N4SV16_MOUSE Anthrax toxin receptor 1 OS=Mus musculus OX=10090 GN=Antxr1 PE=1 SV=1	34586	controllerType=0 controllerNumber=1 scan=10116	58.6647
05900:2	372	C.GYYNTAVKL.A			514.771	2	1028.53	1028.54	0	-6.7	131	Non	270.52	33.36	33.36	2	1	>tr|A0A0J9YVB4|A0A0J9YVB4_MOUSE Macrophage erythroblast attacher (Fragment) OS=Mus musculus OX=10090 GN=Maea PE=1 SV=1	26452	controllerType=0 controllerNumber=1 scan=13233	66.9844
11063:2	230	D.SYKPIVEYI.D			556.302	2	1111.6	1111.6	0	-6.7	113	Non	280.92	88.21	88.21	6.59	1	>tr|A0A0J9YUL3|A0A0J9YUL3_MOUSE Septin 11, isoform CRA_b OS=Mus musculus OX=10090 GN=Sept11 PE=1 SV=1	3694	controllerType=0 controllerNumber=1 scan=20685	87.3342
08611:2	220	E.GYAESLNQL.F			497.742	2	994.476	994.484	0	-7.9	847	Non	306.61	71.31	71.31	6.77	1	>tr|A0A0J9YUC4|A0A0J9YUC4_MOUSE Unconventional myosin-Ih OS=Mus musculus OX=10090 GN=Myo1h PE=1 SV=1	13002	controllerType=0 controllerNumber=1 scan=17560	80.484
09292:2	87	V.GYFAGKLSYV.K			552.785	2	1104.56	1104.57	0	-8.3	32	Non	329.15	146.37	146.37	8.95	1	>tr|A0A0J9YUB6|A0A0J9YUB6_MOUSE OCIA domain-containing protein 1 (Fragment) OS=Mus musculus OX=10090 GN=Ociad1 PE=1 SV=1	6253	controllerType=0 controllerNumber=1 scan=18416	82.317
11993:2	140	L.AYLVDIKTI.A			518.304	2	1035.6	1035.61	0	-7.3	104	Non	351.55	89.23	89.23	8.19	1	>tr|A0A0J9YU41|A0A0J9YU41_MOUSE Intraflagellar transport protein 172 homolog (Fragment) OS=Mus musculus OX=10090 GN=Ift172 PE=1 SV=1	17550	controllerType=0 controllerNumber=1 scan=21888	90.0458
05990:2	142	L.TLYDIAHTPG.V			544.271	2	1087.53	1087.54	0	-6.4	54	Non	349.76	88.75	88.75	8.16	1	>tr|A0A0G2JGY4|A0A0G2JGY4_MOUSE Malate dehydrogenase (Fragment) OS=Mus musculus OX=10090 GN=Mdh2 PE=1 SV=1	6923	controllerType=0 controllerNumber=1 scan=13377	67.4236
05094:2	210	L.NYFPSKQDI.L			556.271	2	1111.54	1111.54	0	-6.1	128	Non	281.3	95.42	95.42	6.92	1	>tr|A0A0G2JG40|A0A0G2JG40_MOUSE Guanine nucleotide-binding protein subunit alpha-12 (Fragment) OS=Mus musculus OX=10090 GN=Gna12 PE=1 SV=1	15481	controllerType=0 controllerNumber=1 scan=11974	63.3401
11451:2	309	V.ISVLLSVAEL.Y			522.323	2	1043.64	1043.63	0	3.3	553	Non	341.33	27.06	27.06	4.9	3	>tr|A0A0G2JE03|A0A0G2JE03_MOUSE Anaphase-promoting complex subunit 5 OS=Mus musculus OX=10090 GN=Anapc5 PE=1 SV=1	9516	controllerType=0 controllerNumber=1 scan=21195	88.5037
11275:2	309	L.QYLASETVL.N			512.267	2	1023.53	1023.54	0	-9.1	589	Non	280.58	2.54	2.54	3.28	3	>tr|A0A0G2JE03|A0A0G2JE03_MOUSE Anaphase-promoting complex subunit 5 OS=Mus musculus OX=10090 GN=Anapc5 PE=1 SV=1	9516	controllerType=0 controllerNumber=1 scan=20956	87.9438
07966:2	309	L.QGPDITLSKL.Y			536.303	2	1071.6	1071.6	0	-6.2	57	Non	212.57	24.52	24.52	2.09	3	>tr|A0A0G2JE03|A0A0G2JE03_MOUSE Anaphase-promoting complex subunit 5 OS=Mus musculus OX=10090 GN=Anapc5 PE=1 SV=1	9516	controllerType=0 controllerNumber=1 scan=16734	78.7143
03790:2	374	S.VYLTPKTSV.S			504.289	2	1007.57	1007.58	0	-6.4	374	Non	274.59	21.1	21.1	2	1	>tr|A0A0A6YX67|A0A0A6YX67_MOUSE BTB/POZ domain-containing protein KCTD3 OS=Mus musculus OX=10090 GN=Kctd3 PE=1 SV=1	15771	controllerType=0 controllerNumber=1 scan=10148	58.7896
09300:2	180	Q.VYIITKPEL.Q			538.319	2	1075.63	1075.64	0	-8.9	42	Non	310.15	60.38	60.38	7.34	2	>tr|A0A0A6YWX8|A0A0A6YWX8_MOUSE GATOR complex protein NPRL2 OS=Mus musculus OX=10090 GN=Nprl2 PE=1 SV=1	35061	controllerType=0 controllerNumber=1 scan=18426	82.3374
14613:2	180	K.LVPIMTILLE.E			571.349	2	1141.69	1141.69	0	0.8	128	CRagged	185.45	59.25	59.25	2.05	2	>tr|A0A0A6YWX8|A0A0A6YWX8_MOUSE GATOR complex protein NPRL2 OS=Mus musculus OX=10090 GN=Nprl2 PE=1 SV=1	35061	controllerType=0 controllerNumber=1 scan=25298	97.8718
12340:2	23	N.TQPIM[+15.995]DTDGSYFV.Y		M[+16]	745.325	2	1489.64	1489.65	0	-5.6	271	Non	325.3	178.84	178.84	10.45	2	>tr|A0A0A6YWR2|A0A0A6YWR2_MOUSE Ig gamma-1 chain C region secreted form (Fragment) OS=Mus musculus OX=10090 GN=Ighg1 PE=1 SV=1	8877	controllerType=0 controllerNumber=1 scan=22327	90.9853
11272:2	23	K.TTPPSVYPLAPG.S			600.315	2	1199.62	1199.63	0	-7.2	3	CRagged	265.79	64.65	64.65	6.22	2	>tr|A0A0A6YWR2|A0A0A6YWR2_MOUSE Ig gamma-1 chain C region secreted form (Fragment) OS=Mus musculus OX=10090 GN=Ighg1 PE=1 SV=1	8877	controllerType=0 controllerNumber=1 scan=20952	87.9355
05952:2	16	A.NYQDTIGRL.Q			540.274	2	1079.54	1079.55	0	-6.9	357	Non	365.7	146.35	146.35	9.19	3	>tr|A0A0A6YWC8|A0A0A6YWC8_MOUSE Vimentin OS=Mus musculus OX=10090 GN=Vim PE=1 SV=1	25685	controllerType=0 controllerNumber=1 scan=13312	67.2091
07233:2	16	R.SSVPGVRLLQ.D			528.31	2	1055.61	1055.62	0	-6.9	72	CRagged	304.95	80.7	80.7	7.18	3	>tr|A0A0A6YWC8|A0A0A6YWC8_MOUSE Vimentin OS=Mus musculus OX=10090 GN=Vim PE=1 SV=1	25685	controllerType=0 controllerNumber=1 scan=15603	75.3694
10606:2	16	R.SSVPGVRLLQDSVD.F			736.385	2	1471.76	1471.78	0	-9	72	CRagged	186.08	76.17	76.17	4.63	3	>tr|A0A0A6YWC8|A0A0A6YWC8_MOUSE Vimentin OS=Mus musculus OX=10090 GN=Vim PE=1 SV=1	25685	controllerType=0 controllerNumber=1 scan=20110	86.0891
12250:2	170	G.LYYINKISSTL.Y			657.865	2	1314.72	1314.73	0	-6.2	83	Non	250.01	104.03	104.03	7.72	1	>tr|A0A0A0MQN1|A0A0A0MQN1_MOUSE Keratinocyte associated protein 2, isoform CRA_c OS=Mus musculus OX=10090 GN=Krtcap2 PE=1 SV=1	3476	controllerType=0 controllerNumber=1 scan=22213	90.7398
06483:2	63	A.TYAPVISAEKAY.H			656.839	2	1312.67	1312.68	0	-5.9	300	Non	319.35	147.93	147.93	9.42	1	>tr|A0A0A0MQA5|A0A0A0MQA5_MOUSE Tubulin alpha chain (Fragment) OS=Mus musculus OX=10090 GN=Tuba4a PE=1 SV=1	25546	controllerType=0 controllerNumber=1 scan=14093	69.2581
09714:2	213	N.YYDLVRTEI.A			586.3	2	1171.59	1171.6	0	-6.3	200	Non	319.55	96.75	96.75	6.92	2	>tr|A0A0A0MQ87|A0A0A0MQ87_MOUSE Son of sevenless homolog 2 OS=Mus musculus OX=10090 GN=Sos2 PE=1 SV=1	14303	controllerType=0 controllerNumber=1 scan=18951	83.4681
07165:2	13	F.YFISSTTRI.N			544.289	2	1087.57	1087.58	0	-6.5	323	Non	385.98	161.98	161.98	9.66	2	>tr|A0A0A0MQ80|A0A0A0MQ80_MOUSE Spermatogenesis-associated protein 5 OS=Mus musculus OX=10090 GN=Spata5 PE=1 SV=1	17936	controllerType=0 controllerNumber=1 scan=15322	73.7385
07198:2	13	I.NGPEIISKF.Y			502.771	2	1004.54	1004.54	0	-5.7	418	Non	381.46	128.07	128.07	9.19	2	>tr|A0A0A0MQ80|A0A0A0MQ80_MOUSE Spermatogenesis-associated protein 5 OS=Mus musculus OX=10090 GN=Spata5 PE=1 SV=1	17936	controllerType=0 controllerNumber=1 scan=15491	74.7752
07244:2	269	K.EYLEGRNLI.T			553.792	2	1106.58	1106.58	0	-6.8	315	CRagged	319.41	101.29	101.29	6.13	2	>tr|A0A087WSQ1|A0A087WSQ1_MOUSE SLIT-ROBO Rho GTPase-activating protein 2 (Fragment) OS=Mus musculus OX=10090 GN=Srgap2 PE=1 SV=1	17384	controllerType=0 controllerNumber=1 scan=15635	75.5248
07392:2	257	R.NYITPQTQI.S			539.28	2	1077.55	1077.56	0	-3.9	80	CRagged	409.08	115.52	115.52	6.26	1	>tr|A0A087WP74|A0A087WP74_MOUSE Retroelement silencing factor 1 OS=Mus musculus OX=10090 GN=Resf1 PE=1 SV=1	6277	controllerType=0 controllerNumber=1 scan=15939	76.7355
09161:2	256	Y.SYLQSQGIGV.S			526.271	2	1051.53	1051.54	0	-7	134	Non	309.87	79.6	79.6	6.28	1	>sp|Q9Z1S0|BUB1B_MOUSE Mitotic checkpoint serine/threonine-protein kinase BUB1 beta OS=Mus musculus OX=10090 GN=Bub1b PE=1 SV=2	41094	controllerType=0 controllerNumber=1 scan=18251	81.9735
05324:2	280	M.TFITSKEDL.N			527.274	2	1053.54	1053.55	0	-5.4	129	Non	275.04	50.93	50.93	5.99	2	>sp|Q9Z1D1|EIF3G_MOUSE Eukaryotic translation initiation factor 3 subunit G OS=Mus musculus OX=10090 GN=Eif3g PE=1 SV=2	46634	controllerType=0 controllerNumber=1 scan=12373	64.6843
05558:2	206	S.NVIEVEHQL.Q			540.784	2	1080.56	1080.57	0	-7.1	157	Non	305.9	52.85	52.85	6.97	1	>sp|Q9Z175|LOXL3_MOUSE Lysyl oxidase homolog 3 OS=Mus musculus OX=10090 GN=Loxl3 PE=1 SV=2	46968	controllerType=0 controllerNumber=1 scan=12721	65.6029
04394:2	379	E.SYM[+15.995]GIRDTEL.A		M[+16]	600.778	2	1200.55	1200.56	0	-6.4	274	Non	246.63	20.57	20.57	1.62	1	>sp|Q9Z0G0|GIPC1_MOUSE PDZ domain-containing protein GIPC1 OS=Mus musculus OX=10090 GN=Gipc1 PE=1 SV=1	45247	controllerType=0 controllerNumber=1 scan=11012	61.0257
06392:2	34	D.SYLPVGSHNL.K			543.779	2	1086.55	1086.56	0	-6.3	415	Non	339.13	57.34	57.34	7.76	3	>sp|Q9WVF7|DPOE1_MOUSE DNA polymerase epsilon catalytic subunit A OS=Mus musculus OX=10090 GN=Pole PE=1 SV=3	50567	controllerType=0 controllerNumber=1 scan=13959	68.9004
06902:2	34	Q.GYLITNREI.V			539.795	2	1078.58	1078.59	0	-5.2	304	Non	317.84	48.1	48.1	6.52	3	>sp|Q9WVF7|DPOE1_MOUSE DNA polymerase epsilon catalytic subunit A OS=Mus musculus OX=10090 GN=Pole PE=1 SV=3	50567	controllerType=0 controllerNumber=1 scan=14651	70.5357
08857:2	362	S.YFQPAISRL.T			547.798	2	1094.59	1094.6	0	-8.9	384	Non	252.39	31.69	31.69	1.9	2	>sp|Q9WU79|PROD_MOUSE Proline dehydrogenase 1, mitochondrial OS=Mus musculus OX=10090 GN=Prodh PE=1 SV=2	52111	controllerType=0 controllerNumber=1 scan=17871	81.1724
07190:2	136	V.NFIGTKTVI.E			496.789	2	992.571	992.577	0	-6.9	110	Non	384.07	80.02	80.02	8.22	1	>sp|Q9R1J0|NSDHL_MOUSE Sterol-4-alpha-carboxylate 3-dehydrogenase, decarboxylating OS=Mus musculus OX=10090 GN=Nsdhl PE=1 SV=1	49649	controllerType=0 controllerNumber=1 scan=15460	74.5994
06049:2	159	Q.VYIPTYTKP.N			541.295	2	1081.58	1081.59	0	-8.6	334	Non	320.19	93.94	93.94	7.86	2	>sp|Q9R190|MTA2_MOUSE Metastasis-associated protein MTA2 OS=Mus musculus OX=10090 GN=Mta2 PE=1 SV=1	48057	controllerType=0 controllerNumber=1 scan=13452	67.5743
02928:2	368	K.TGFTESVEKATNSN.R			742.84	2	1484.67	1484.69	0	-9.5	1223	CRagged	169.68	54.12	54.12	2.06	1	>sp|Q9R0L6|PCM1_MOUSE Pericentriolar material 1 protein OS=Mus musculus OX=10090 GN=Pcm1 PE=1 SV=2	51087	controllerType=0 controllerNumber=1 scan=8843	55.0349
06097:2	311	P.TYNRIINQI.S			567.813	2	1134.62	1134.63	0	-6.4	229	Non	252.18	45.29	45.29	5.4	1	>sp|Q9R045|ANGL2_MOUSE Angiopoietin-related protein 2 OS=Mus musculus OX=10090 GN=Angptl2 PE=2 SV=2	52813	controllerType=0 controllerNumber=1 scan=13534	67.8384
04212:2	284	L.GYAKAINAL.K			460.761	2	920.515	920.52	0	-5	276	Non	280.22	46.89	46.89	5.93	1	>sp|Q9QXE2|DPOLL_MOUSE DNA polymerase lambda OS=Mus musculus OX=10090 GN=Poll PE=2 SV=1	46468	controllerType=0 controllerNumber=1 scan=10754	60.366
13701:2	275	L.KFIATLQYI.V			548.82	2	1096.63	1096.64	0	-7.4	651	Non	293.41	57.94	57.94	6.07	1	>sp|Q9QUR6|PPCE_MOUSE Prolyl endopeptidase OS=Mus musculus OX=10090 GN=Prep PE=1 SV=1	51594	controllerType=0 controllerNumber=1 scan=24083	94.955
05004:2	89	L.AYISQVPTQM[+15.995].S		M[+16]	577.278	2	1153.55	1153.56	0	-5.8	657	Non	293.85	70.17	70.17	6.28	3	>sp|Q9JLV2|TP4AP_MOUSE Short transient receptor potential channel 4-associated protein OS=Mus musculus OX=10090 GN=Trpc4ap PE=1 SV=2	44890	controllerType=0 controllerNumber=1 scan=11844	63.0183
07928:2	89	F.SYWKETVSI.L			556.786	2	1112.56	1112.56	0	2.1	759	Non	313.75	55.78	55.78	5.18	3	>sp|Q9JLV2|TP4AP_MOUSE Short transient receptor potential channel 4-associated protein OS=Mus musculus OX=10090 GN=Trpc4ap PE=1 SV=2	44890	controllerType=0 controllerNumber=1 scan=16678	78.5587
08951:2	89	L.AYISQVPTQM.S			569.279	2	1137.55	1137.56	0	-9	657	Non	195.91	7.75	7.75	1.81	3	>sp|Q9JLV2|TP4AP_MOUSE Short transient receptor potential channel 4-associated protein OS=Mus musculus OX=10090 GN=Trpc4ap PE=1 SV=2	44890	controllerType=0 controllerNumber=1 scan=17987	81.4149
07224:2	95	E.RYLPAPTAL.G			501.289	2	1001.57	1001.58	0	-6.3	956	Non	407.22	119.07	119.07	8.8	1	>sp|Q9JL70|FANCA_MOUSE Fanconi anemia group A protein homolog OS=Mus musculus OX=10090 GN=Fanca PE=2 SV=2	46133	controllerType=0 controllerNumber=1 scan=15573	75.2034
08028:2	364	N.RYQELINDI.A			582.302	2	1163.6	1163.61	0	-7.4	1477	Non	289.75	22.16	22.16	2.09	2	>sp|Q9JKF1|IQGA1_MOUSE Ras GTPase-activating-like protein IQGAP1 OS=Mus musculus OX=10090 GN=Iqgap1 PE=1 SV=2	42475	controllerType=0 controllerNumber=1 scan=16820	78.9262
04562:2	341	V.NFTVTRSSL.Q			512.771	2	1024.54	1024.54	0	-6.2	3698	Non	296.62	34.31	34.31	2.82	2	>sp|Q9JHU4|DYHC1_MOUSE Cytoplasmic dynein 1 heavy chain 1 OS=Mus musculus OX=10090 GN=Dync1h1 PE=1 SV=2	39183	controllerType=0 controllerNumber=1 scan=11255	61.6647
03827:2	398	T.LHLTTLGAQD.S			534.784	2	1068.56	1068.57	0	-7.2	142	Non	246.33	7.34	7.34	1.69	1	>sp|Q9ERE9|JIP2_MOUSE C-Jun-amino-terminal kinase-interacting protein 2 OS=Mus musculus OX=10090 GN=Mapk8ip2 PE=1 SV=1	42357	controllerType=0 controllerNumber=1 scan=10197	58.9135
07104:2	20	A.YFKSSLTTI.E			530.286	2	1059.57	1059.57	0	-6.1	51	Non	407.26	113.45	113.45	8.65	2	>sp|Q9EPT5|SO2A1_MOUSE Solute carrier organic anion transporter family member 2A1 OS=Mus musculus OX=10090 GN=Slco2a1 PE=1 SV=2	38269	controllerType=0 controllerNumber=1 scan=15032	71.9597
08029:2	20	S.AYFKSSLTTI.E			565.804	2	1130.6	1130.61	0	-7.2	50	Non	305.69	104.88	104.88	7.9	2	>sp|Q9EPT5|SO2A1_MOUSE Solute carrier organic anion transporter family member 2A1 OS=Mus musculus OX=10090 GN=Slco2a1 PE=1 SV=2	38269	controllerType=0 controllerNumber=1 scan=16821	78.928
16314:2	102	V.SFLETVNQL.H			525.774	2	1050.54	1050.55	0	-6.3	134	Non	384.34	119.74	119.74	8.67	1	>sp|Q9EP52|TWSG1_MOUSE Twisted gastrulation protein homolog 1 OS=Mus musculus OX=10090 GN=Twsg1 PE=1 SV=1	43661	controllerType=0 controllerNumber=1 scan=27755	104.49
14412:2	208	S.VYYPQQAITI.A			598.317	2	1195.63	1195.64	0	-7.5	149	Non	292.12	80.56	80.56	6.96	1	>sp|Q9DCZ4|MIC26_MOUSE MICOS complex subunit Mic26 OS=Mus musculus OX=10090 GN=Apoo PE=1 SV=2	47433	controllerType=0 controllerNumber=1 scan=25034	97.2802
07035:2	51	N.ALSFSGGPGALR.A			566.805	2	1132.6	1132.61	0	-6.5	430	NRagged	502.7	226.45	226.45	9.92	1	>sp|Q9DCV7|K2C7_MOUSE Keratin, type II cytoskeletal 7 OS=Mus musculus OX=10090 GN=Krt7 PE=1 SV=1	41671	controllerType=0 controllerNumber=1 scan=14878	71.2854
07846:2	394	H.NLLTTRNYI.F			554.307	2	1107.61	1107.62	0	-8.6	149	Non	262.37	1.37	1.37	1.72	1	>sp|Q9DCV3|DGAT2_MOUSE Diacylglycerol O-acyltransferase 2 OS=Mus musculus OX=10090 GN=Dgat2 PE=1 SV=1	46399	controllerType=0 controllerNumber=1 scan=16578	78.3667
13648:2	55	V.TYLANLTQSQI.A			626.327	2	1251.65	1251.66	0	-8.1	342	Non	373.34	145.55	145.55	9.72	2	>sp|Q9DCH4|EIF3F_MOUSE Eukaryotic translation initiation factor 3 subunit F OS=Mus musculus OX=10090 GN=Eif3f PE=1 SV=2	46627	controllerType=0 controllerNumber=1 scan=24014	94.8103
08554:2	55	C.FSPNRVIGL.S			501.786	2	1002.56	1002.57	0	-9	261	Non	177.5	7.28	7.28	1.92	2	>sp|Q9DCH4|EIF3F_MOUSE Eukaryotic translation initiation factor 3 subunit F OS=Mus musculus OX=10090 GN=Eif3f PE=1 SV=2	46627	controllerType=0 controllerNumber=1 scan=17488	80.3188
13269:2	189	K.NFNPTVNYI.L			541.264	2	1081.52	1081.53	0	-9.1	159	CRagged	385.33	93.65	93.65	7.29	1	>sp|Q9DCF9|SSRG_MOUSE Translocon-associated protein subunit gamma OS=Mus musculus OX=10090 GN=Ssr3 PE=1 SV=1	45116	controllerType=0 controllerNumber=1 scan=23520	93.6787
07157:2	58	E.SYVDIHTGL.S			502.753	2	1004.5	1004.5	0	-6.4	168	Non	415.05	183.62	183.62	9.53	1	>sp|Q9DCC4|P5CR3_MOUSE Pyrroline-5-carboxylate reductase 3 OS=Mus musculus OX=10090 GN=Pycr3 PE=1 SV=2	51407	controllerType=0 controllerNumber=1 scan=15277	73.4506
09338:2	404	L.KYLAVLGTVT.F			532.816	2	1064.62	1064.63	0	-9.5	604	Non	260.28	9.56	9.56	1.59	2	>sp|Q9DBG6|RPN2_MOUSE Dolichyl-diphosphooligosaccharide--protein glycosyltransferase subunit 2 OS=Mus musculus OX=10090 GN=Rpn2 PE=1 SV=1	48976	controllerType=0 controllerNumber=1 scan=18473	82.4355
09181:2	226	R.SYFIPKGTEL.V			577.803	2	1154.6	1154.61	0	-8.4	378	CRagged	301.01	44.83	44.83	6.6	1	>sp|Q9D816|CP255_MOUSE Cytochrome P450 2C55 OS=Mus musculus OX=10090 GN=Cyp2c55 PE=1 SV=1	50626	controllerType=0 controllerNumber=1 scan=18275	82.0202
03047:2	338	K.SYLNVRTNP.V			532.276	2	1063.55	1063.55	0	-7.3	185	CRagged	240.65	70.96	70.96	3.11	1	>sp|Q9D753|EXOS8_MOUSE Exosome complex component RRP43 OS=Mus musculus OX=10090 GN=Exosc8 PE=1 SV=1	45333	controllerType=0 controllerNumber=1 scan=9025	55.5699
06712:2	197	A.RFNPSISM[+15.995]I.K		M[+16]	540.775	2	1080.54	1080.55	0	-6.8	710	Non	321.83	57.07	57.07	6.78	1	>sp|Q9D4H8|CUL2_MOUSE Cullin-2 OS=Mus musculus OX=10090 GN=Cul2 PE=1 SV=2	39967	controllerType=0 controllerNumber=1 scan=14379	69.8169
09354:2	248	N.SYLEDKVYL.A			565.288	2	1129.57	1129.58	0	-7.7	100	Non	314.22	83.59	83.59	6.41	1	>sp|Q9D1M4|MCA3_MOUSE Eukaryotic translation elongation factor 1 epsilon-1 OS=Mus musculus OX=10090 GN=Eef1e1 PE=1 SV=1	47249	controllerType=0 controllerNumber=1 scan=18493	82.4749
09384:2	246	E.SYANVKQWL.Q			554.788	2	1108.57	1108.58	0	-8.4	95	Non	283.51	59.68	59.68	6.41	2	>sp|Q9D1G1|RAB1B_MOUSE Ras-related protein Rab-1B OS=Mus musculus OX=10090 GN=Rab1b PE=1 SV=1	37325	controllerType=0 controllerNumber=1 scan=18531	82.5641
11882:2	246	D.TYTESYISTI.G			589.28	2	1177.55	1177.56	0	-8.7	32	Non	207.68	13.45	13.45	1.81	2	>sp|Q9D1G1|RAB1B_MOUSE Ras-related protein Rab-1B OS=Mus musculus OX=10090 GN=Rab1b PE=1 SV=1	37325	controllerType=0 controllerNumber=1 scan=21744	89.7302
06105:2	253	N.QGPEYIERL.P			552.784	2	1104.56	1104.57	0	-6.5	246	Non	274.96	90.38	90.38	6.38	1	>sp|Q9CXG9|PHF19_MOUSE PHD finger protein 19 OS=Mus musculus OX=10090 GN=Phf19 PE=1 SV=1	49674	controllerType=0 controllerNumber=1 scan=13550	67.9003
07289:2	33	C.GYIESIQHI.L			530.274	2	1059.54	1059.55	0	-5.6	201	Non	443.05	182.01	182.01	9.58	2	>sp|Q9CXC3|MGME1_MOUSE Mitochondrial genome maintenance exonuclease 1 OS=Mus musculus OX=10090 GN=Mgme1 PE=2 SV=1	41742	controllerType=0 controllerNumber=1 scan=15733	75.9325
05403:2	33	G.YIESIQHI.L			501.763	2	1002.52	1002.53	0	-6.5	202	Non	263.86	37.34	37.34	4.24	2	>sp|Q9CXC3|MGME1_MOUSE Mitochondrial genome maintenance exonuclease 1 OS=Mus musculus OX=10090 GN=Mgme1 PE=2 SV=1	41742	controllerType=0 controllerNumber=1 scan=12486	64.9607
07014:2	265	K.AYLHIASEV.V			501.763	2	1002.52	1002.53	0	-6.6	302	CRagged	316.46	82.54	82.54	6.18	1	>sp|Q9CWD8|NUBPL_MOUSE Iron-sulfur protein NUBPL OS=Mus musculus OX=10090 GN=Nubpl PE=1 SV=2	49678	controllerType=0 controllerNumber=1 scan=14851	71.2288
12595:2	37	R.TYKELLVNL.N			546.814	2	1092.62	1092.63	0	-8.1	23	CRagged	315.06	103.05	103.05	7.28	3	>sp|Q9CRB2|NHP2_MOUSE H/ACA ribonucleoprotein complex subunit 2 OS=Mus musculus OX=10090 GN=Nhp2 PE=1 SV=1	49917	controllerType=0 controllerNumber=1 scan=22641	91.6487
05921:2	37	Y.VYIPSKTDLGAAT.G			668.357	2	1335.71	1335.72	0	-6	106	Non	218.07	34.09	34.09	5.05	3	>sp|Q9CRB2|NHP2_MOUSE H/ACA ribonucleoprotein complex subunit 2 OS=Mus musculus OX=10090 GN=Nhp2 PE=1 SV=1	49917	controllerType=0 controllerNumber=1 scan=13267	67.0934
05689:2	37	Y.VYIPSKTDL.G			518.286	2	1035.56	1035.57	0	-7.1	106	Non	244.29	22.89	22.89	4.57	3	>sp|Q9CRB2|NHP2_MOUSE H/ACA ribonucleoprotein complex subunit 2 OS=Mus musculus OX=10090 GN=Nhp2 PE=1 SV=1	49917	controllerType=0 controllerNumber=1 scan=12917	66.1255
12571:2	36	A.TVGLNVPASVRF.S			630.354	2	1259.7	1259.71	0	-8.3	67	Non	327.77	117.23	117.23	9.33	2	>sp|Q9CR68|UCRI_MOUSE Cytochrome b-c1 complex subunit Rieske, mitochondrial OS=Mus musculus OX=10090 GN=Uqcrfs1 PE=1 SV=1	43679	controllerType=0 controllerNumber=1 scan=22611	91.5835
09838:2	36	V.GLNVPASVRF.S			530.297	2	1059.59	1059.59	0	-7.8	69	Non	259.76	29.57	29.57	4.65	2	>sp|Q9CR68|UCRI_MOUSE Cytochrome b-c1 complex subunit Rieske, mitochondrial OS=Mus musculus OX=10090 GN=Uqcrfs1 PE=1 SV=1	43679	controllerType=0 controllerNumber=1 scan=19111	83.823
05363:2	224	K.TKDIKEGIPLPT.K			656.375	2	1311.74	1311.75	0	-6.3	57	CRagged	288.18	147.23	147.23	6.65	1	>sp|Q9CQF0|RM11_MOUSE 39S ribosomal protein L11, mitochondrial OS=Mus musculus OX=10090 GN=Mrpl11 PE=1 SV=1	48793	controllerType=0 controllerNumber=1 scan=12427	64.8108
06542:2	255	N.TYISVPKENSTL.N			676.354	2	1351.7	1351.71	0	-6.9	126	Non	236.6	63.51	63.51	6.3	3	>sp|Q9CQA1|TPPC5_MOUSE Trafficking protein particle complex subunit 5 OS=Mus musculus OX=10090 GN=Trappc5 PE=1 SV=1	44211	controllerType=0 controllerNumber=1 scan=14166	69.4028
11132:2	331	R.M[+15.995]FIEDLHNL.N		M[+16]	574.271	2	1147.54	1147.55	0	-8.7	102	CRagged	263.96	63.3	63.3	2.78	1	>sp|Q9CPY1|RM51_MOUSE 39S ribosomal protein L51, mitochondrial OS=Mus musculus OX=10090 GN=Mrpl51 PE=1 SV=1	48581	controllerType=0 controllerNumber=1 scan=20770	87.5185
09152:2	278	R.YYKPGILLM[+15.995].C		M[+16]	557.301	2	1113.59	1113.6	0	-6.5	217	CRagged	278.53	83.13	83.13	5.65	1	>sp|Q99PL7|SCD3_MOUSE Acyl-CoA desaturase 3 OS=Mus musculus OX=10090 GN=Scd3 PE=1 SV=1	37587	controllerType=0 controllerNumber=1 scan=18241	81.9527
11779:2	93	M.FYLETQQQI.S			585.29	2	1169.57	1169.58	0	-9.5	537	Non	352.94	124.2	124.2	8.81	1	>sp|Q99MP8|BRAP_MOUSE BRCA1-associated protein OS=Mus musculus OX=10090 GN=Brap PE=1 SV=1	40874	controllerType=0 controllerNumber=1 scan=21619	89.4792
05778:2	218	T.SYQSQINQI.R			540.766	2	1080.52	1080.53	0	-7.4	245	Non	312.1	54.83	54.83	6.77	2	>sp|Q99MJ9|DDX50_MOUSE ATP-dependent RNA helicase DDX50 OS=Mus musculus OX=10090 GN=Ddx50 PE=2 SV=1	39043	controllerType=0 controllerNumber=1 scan=13042	66.4212
07402:2	157	M.SYLESKGLL.A			505.278	2	1009.55	1009.56	0	-7.2	216	Non	338.07	47.91	47.91	7.9	2	>sp|Q99ME2|WDR6_MOUSE WD repeat-containing protein 6 OS=Mus musculus OX=10090 GN=Wdr6 PE=1 SV=1	44692	controllerType=0 controllerNumber=1 scan=15954	76.769
07238:2	260	I.SFHPSGDFI.L			503.732	2	1006.46	1006.46	0	-6.9	224	Non	322.98	52.84	52.84	6.19	1	>sp|Q99LC2|CSTF1_MOUSE Cleavage stimulation factor subunit 1 OS=Mus musculus OX=10090 GN=Cstf1 PE=1 SV=1	39983	controllerType=0 controllerNumber=1 scan=15618	75.4407
05676:2	319	I.RVPLKTGFL.H			515.82	2	1030.63	1030.64	0	-7.5	12	Non	270.12	45.62	45.62	5.32	1	>sp|Q99JZ7|ERRFI_MOUSE ERBB receptor feedback inhibitor 1 OS=Mus musculus OX=10090 GN=Errfi1 PE=1 SV=1	45519	controllerType=0 controllerNumber=1 scan=12897	66.0709
13383:2	105	A.AYQSIQSYL.R			536.765	2	1072.52	1072.53	0	-7.3	390	Non	397.2	135.23	135.23	8.65	2	>sp|Q925U4|EDEM1_MOUSE ER degradation-enhancing alpha-mannosidase-like protein 1 OS=Mus musculus OX=10090 GN=Edem1 PE=1 SV=1	46700	controllerType=0 controllerNumber=1 scan=23670	94.0211
09565:2	119	F.EYQKLYTYI.Q			610.808	2	1220.61	1220.62	0	-9.1	361	Non	245.52	58.55	58.55	5.87	2	>sp|Q922Y0|DYRK3_MOUSE Dual specificity tyrosine-phosphorylation-regulated kinase 3 OS=Mus musculus OX=10090 GN=Dyrk3 PE=1 SV=1	39168	controllerType=0 controllerNumber=1 scan=18757	83.0441
07806:2	119	K.YFINSKGLP.R			519.781	2	1038.55	1038.56	0	-7.5	440	CRagged	291.6	47.81	47.81	5.62	2	>sp|Q922Y0|DYRK3_MOUSE Dual specificity tyrosine-phosphorylation-regulated kinase 3 OS=Mus musculus OX=10090 GN=Dyrk3 PE=1 SV=1	39168	controllerType=0 controllerNumber=1 scan=16527	78.2547
12444:2	126	A.NYISGIQTI.G			504.768	2	1008.53	1008.54	0	-7.7	988	Non	381.3	102.16	102.16	8.08	3	>sp|Q921M3|SF3B3_MOUSE Splicing factor 3B subunit 3 OS=Mus musculus OX=10090 GN=Sf3b3 PE=1 SV=1	37437	controllerType=0 controllerNumber=1 scan=22456	91.2485
13202:2	126	S.YYFPVKNVI.D			571.811	2	1142.62	1142.62	0	-8.2	1166	Non	211.54	13.55	13.55	2.95	3	>sp|Q921M3|SF3B3_MOUSE Splicing factor 3B subunit 3 OS=Mus musculus OX=10090 GN=Sf3b3 PE=1 SV=1	37437	controllerType=0 controllerNumber=1 scan=23429	93.4517
08579:2	126	Y.YFPVKNVI.D			490.281	2	979.555	979.561	0	-6.3	1167	Non	189.32	1.78	1.78	1.97	3	>sp|Q921M3|SF3B3_MOUSE Splicing factor 3B subunit 3 OS=Mus musculus OX=10090 GN=Sf3b3 PE=1 SV=1	37437	controllerType=0 controllerNumber=1 scan=17521	80.4031
10058:2	42	N.SYSGSNSGAPLGWGSA.S			749.328	2	1497.65	1497.66	0	-8.2	373	Non	246.72	103.87	103.87	7.43	2	>sp|Q921F2|TADBP_MOUSE TAR DNA-binding protein 43 OS=Mus musculus OX=10090 GN=Tardbp PE=1 SV=1	38599	controllerType=0 controllerNumber=1 scan=19403	84.5074
09199:2	42	N.SYSGSNSGAPLGWGS.A			713.81	2	1426.61	1426.62	0	-7.4	373	Non	179.77	84.24	84.24	6.15	2	>sp|Q921F2|TADBP_MOUSE TAR DNA-binding protein 43 OS=Mus musculus OX=10090 GN=Tardbp PE=1 SV=1	38599	controllerType=0 controllerNumber=1 scan=18297	82.0636
08004:2	176	M.GYIASLHEL.A			501.763	2	1002.52	1002.53	0	-7	684	Non	326.29	57.87	57.87	7.57	1	>sp|Q920R0|ALS2_MOUSE Alsin OS=Mus musculus OX=10090 GN=Als2 PE=1 SV=3	52937	controllerType=0 controllerNumber=1 scan=16790	78.8625
04477:2	267	K.NYLETGRGL.C			511.765	2	1022.52	1022.53	0	-4.5	64	CRagged	394.83	105.39	105.39	6.17	1	>sp|Q91ZN5|S35B2_MOUSE Adenosine 3'-phospho 5'-phosphosulfate transporter 1 OS=Mus musculus OX=10090 GN=Slc35b2 PE=1 SV=1	49091	controllerType=0 controllerNumber=1 scan=11137	61.3713
06680:2	254	Q.TYSPSRVLI.T			518.292	2	1035.58	1035.58	0	-6.1	463	Non	279.26	85.24	85.24	6.38	1	>sp|Q91XU0|WRIP1_MOUSE ATPase WRNIP1 OS=Mus musculus OX=10090 GN=Wrnip1 PE=1 SV=2	44527	controllerType=0 controllerNumber=1 scan=14341	69.7381
09687:2	430	R.FLLPSQSSKPVR.I			679.894	2	1358.78	1358.78	0	0.6	191	Specific	281.39	107.98	107.98	1.3	1	>sp|Q91WB4|PKHF2_MOUSE Pleckstrin homology domain-containing family F member 2 OS=Mus musculus OX=10090 GN=Plekhf2 PE=1 SV=1	51642	controllerType=0 controllerNumber=1 scan=18912	83.3694
04745:2	40	Q.KYDPINSM[+15.995]L.T		M[+16]	548.768	2	1096.53	1096.53	0	-6.1	313	Non	364.27	140.54	140.54	9.33	3	>sp|Q91VC9|GHITM_MOUSE Growth hormone-inducible transmembrane protein OS=Mus musculus OX=10090 GN=Ghitm PE=1 SV=1	45292	controllerType=0 controllerNumber=1 scan=11500	62.2295
08668:2	40	Q.KYDPINSML.T			540.769	2	1080.53	1080.54	0	-7.8	313	Non	217.51	24.3	24.3	2.8	3	>sp|Q91VC9|GHITM_MOUSE Growth hormone-inducible transmembrane protein OS=Mus musculus OX=10090 GN=Ghitm PE=1 SV=1	45292	controllerType=0 controllerNumber=1 scan=17634	80.6678
05963:2	59	C.GYNSVQHLI.N			515.766	2	1030.52	1030.53	0	-6.7	682	Non	370.75	194.14	194.14	9.5	1	>sp|Q91V83|TTI1_MOUSE TELO2-interacting protein 1 homolog OS=Mus musculus OX=10090 GN=Tti1 PE=1 SV=2	43615	controllerType=0 controllerNumber=1 scan=13334	67.2972
08099:2	124	G.KYNILGTNTI.M			568.815	2	1136.62	1136.63	0	-8	500	Non	378.17	82.48	82.48	8.44	1	>sp|Q8VEK3|HNRPU_MOUSE Heterogeneous nuclear ribonucleoprotein U OS=Mus musculus OX=10090 GN=Hnrnpu PE=1 SV=1	42739	controllerType=0 controllerNumber=1 scan=16907	79.0971
09847:2	322	L.TYKALNTFI.D			535.793	2	1070.58	1070.59	0	-8.7	545	Non	256.59	62.11	62.11	5.29	2	>sp|Q8VBZ3|CLPT1_MOUSE Cleft lip and palate transmembrane protein 1 homolog OS=Mus musculus OX=10090 GN=Clptm1 PE=1 SV=1	40334	controllerType=0 controllerNumber=1 scan=19123	83.853
07018:2	151	S.SFLAARTQL.P			503.784	2	1006.56	1006.57	0	-6.6	942	Non	352.39	82.4	82.4	7.9	2	>sp|Q8R5K4|NOL6_MOUSE Nucleolar protein 6 OS=Mus musculus OX=10090 GN=Nol6 PE=2 SV=2	53264	controllerType=0 controllerNumber=1 scan=14856	71.2401
10045:2	151	S.GYQVLRSVL.Q			517.799	2	1034.59	1034.6	0	-9.1	377	Non	184.95	9.91	9.91	1.92	2	>sp|Q8R5K4|NOL6_MOUSE Nucleolar protein 6 OS=Mus musculus OX=10090 GN=Nol6 PE=2 SV=2	53264	controllerType=0 controllerNumber=1 scan=19386	84.4725
03921:2	35	S.GGPSLEQRF.E			495.75	2	990.494	990.5	0	-6.5	146	Non	344.99	81.3	81.3	7.9	3	>sp|Q8QZY1|EIF3L_MOUSE Eukaryotic translation initiation factor 3 subunit L OS=Mus musculus OX=10090 GN=Eif3l PE=1 SV=1	46205	controllerType=0 controllerNumber=1 scan=10339	59.3014
04184:2	35	D.YYQAIKV.L			442.745	2	884.482	884.488	0	-6	287	Non	282.19	12.55	12.55	5.09	3	>sp|Q8QZY1|EIF3L_MOUSE Eukaryotic translation initiation factor 3 subunit L OS=Mus musculus OX=10090 GN=Eif3l PE=1 SV=1	46205	controllerType=0 controllerNumber=1 scan=10706	60.2029
07548:2	35	D.IYENSWTKL.T			577.294	2	1153.58	1153.59	0	-6.2	94	Non	256.63	8.78	8.78	3.98	3	>sp|Q8QZY1|EIF3L_MOUSE Eukaryotic translation initiation factor 3 subunit L OS=Mus musculus OX=10090 GN=Eif3l PE=1 SV=1	46205	controllerType=0 controllerNumber=1 scan=16198	77.558
08379:2	240	R.VGPTILNKI.E			477.8	2	954.592	954.598	0	-6.6	478	CRagged	282.35	66.79	66.79	6.52	1	>sp|Q8QZS3|FLCN_MOUSE Folliculin OS=Mus musculus OX=10090 GN=Flcn PE=1 SV=1	50011	controllerType=0 controllerNumber=1 scan=17266	79.8511
08499:2	27	V.SSPGPSRIADYL.L			631.818	2	1262.63	1262.64	0	-7.4	84	Non	260.83	144.74	144.74	8.82	3	>sp|Q8K4K4|TRIB1_MOUSE Tribbles homolog 1 OS=Mus musculus OX=10090 GN=Trib1 PE=2 SV=2	44284	controllerType=0 controllerNumber=1 scan=17419	80.1751
08308:2	27	S.SPGPSRIADYL.L			588.301	2	1175.6	1175.61	0	-8.8	85	Non	276.45	88.92	88.92	6.82	3	>sp|Q8K4K4|TRIB1_MOUSE Tribbles homolog 1 OS=Mus musculus OX=10090 GN=Trib1 PE=2 SV=2	44284	controllerType=0 controllerNumber=1 scan=17173	79.6531
07877:2	27	S.PGPSRIADYL.L			544.786	2	1088.56	1088.57	0	-8.7	86	Non	200.92	17.94	17.94	2.02	3	>sp|Q8K4K4|TRIB1_MOUSE Tribbles homolog 1 OS=Mus musculus OX=10090 GN=Trib1 PE=2 SV=2	44284	controllerType=0 controllerNumber=1 scan=16616	78.4361
06508:2	144	I.FYSKPQLNTL.A			605.823	2	1210.64	1210.65	0	-6.6	494	Non	295.62	90.82	90.82	8.04	1	>sp|Q8K3P5|CNOT6_MOUSE CCR4-NOT transcription complex subunit 6 OS=Mus musculus OX=10090 GN=Cnot6 PE=1 SV=2	50662	controllerType=0 controllerNumber=1 scan=14125	69.321
04570:2	18	T.FYEKVQSDL.L			564.779	2	1128.55	1128.56	0	-5.2	331	Non	342.09	106.86	106.86	8.3	3	>sp|Q8K2P7|S38A1_MOUSE Sodium-coupled neutral amino acid transporter 1 OS=Mus musculus OX=10090 GN=Slc38a1 PE=1 SV=1	37901	controllerType=0 controllerNumber=1 scan=11266	61.6883
08330:2	18	T.FYEKVQSDLL.H			621.319	2	1241.63	1241.64	0	-8.1	331	Non	290.55	106.12	106.12	8.26	3	>sp|Q8K2P7|S38A1_MOUSE Sodium-coupled neutral amino acid transporter 1 OS=Mus musculus OX=10090 GN=Slc38a1 PE=1 SV=1	37901	controllerType=0 controllerNumber=1 scan=17201	79.7083
13225:2	18	A.WYVDGRVLV.V			553.798	2	1106.59	1106.6	0	-9	190	Non	277.1	42.63	42.63	4.46	3	>sp|Q8K2P7|S38A1_MOUSE Sodium-coupled neutral amino acid transporter 1 OS=Mus musculus OX=10090 GN=Slc38a1 PE=1 SV=1	37901	controllerType=0 controllerNumber=1 scan=23458	93.5125
03388:2	381	E.SYTPSKISV.R			491.263	2	981.518	981.525	0	-7.1	88	Non	289.66	43.4	43.4	1.95	1	>sp|Q8K2H6|APC10_MOUSE Anaphase-promoting complex subunit 10 OS=Mus musculus OX=10090 GN=Anapc10 PE=1 SV=1	52359	controllerType=0 controllerNumber=1 scan=9526	56.9987
06893:2	162	D.GYYAM[+15.995]VGQV.H		M[+16]	502.229	2	1003.45	1003.46	0	-4.8	261	Non	331.4	63.49	63.49	7.47	1	>sp|Q8K2C8|GPAT4_MOUSE Glycerol-3-phosphate acyltransferase 4 OS=Mus musculus OX=10090 GN=Gpat4 PE=1 SV=1	42113	controllerType=0 controllerNumber=1 scan=14628	70.4336
10893:2	196	V.SYGLTPRLL.K			510.293	2	1019.58	1019.59	0	-9.2	712	Non	285.53	81.52	81.52	7.19	1	>sp|Q8K224|NAT10_MOUSE RNA cytidine acetyltransferase OS=Mus musculus OX=10090 GN=Nat10 PE=1 SV=1	48354	controllerType=0 controllerNumber=1 scan=20472	86.8804
05991:2	211	E.IYSTSKAFI.G			515.281	2	1029.56	1029.56	0	-5.8	115	Non	307.51	98.72	98.72	6.92	1	>sp|Q8JZS6|N42L2_MOUSE NEDD4-binding protein 2-like 2 OS=Mus musculus OX=10090 GN=N4bp2l2 PE=2 SV=2	47539	controllerType=0 controllerNumber=1 scan=13379	67.4279
05901:2	405	Q.KYNEVTATYL.L			601.304	2	1201.6	1201.61	0	-7.3	356	Non	252.22	39.92	39.92	1.59	1	>sp|Q8CIP4|MARK4_MOUSE MAP/microtubule affinity-regulating kinase 4 OS=Mus musculus OX=10090 GN=Mark4 PE=1 SV=1	47245	controllerType=0 controllerNumber=1 scan=13234	66.9867
08799:2	351	N.SYLATLTEKTV.H			613.333	2	1225.66	1225.67	0	-7	758	Non	234.46	47.73	47.73	2.47	1	>sp|Q8CIK8|RFWD3_MOUSE E3 ubiquitin-protein ligase RFWD3 OS=Mus musculus OX=10090 GN=Rfwd3 PE=2 SV=1	36796	controllerType=0 controllerNumber=1 scan=17798	81.0219
08529:2	273	D.KFIESIQSI.P			532.798	2	1064.59	1064.6	0	-8.5	325	Non	312.63	55.26	55.26	6.07	1	>sp|Q8CI78|RMND1_MOUSE Required for meiotic nuclear division protein 1 homolog OS=Mus musculus OX=10090 GN=Rmnd1 PE=1 SV=1	48590	controllerType=0 controllerNumber=1 scan=17455	80.2435
08144:2	192	L.FYSQDLTHL.N			562.27	2	1123.53	1123.54	0	-8.1	613	Non	301.51	111.44	111.44	7.26	1	>sp|Q8CHE4|PHLP1_MOUSE PH domain leucine-rich repeat-containing protein phosphatase 1 OS=Mus musculus OX=10090 GN=Phlpp1 PE=1 SV=2	49633	controllerType=0 controllerNumber=1 scan=16967	79.2312
07935:2	378	N.TWKENLTEL.S			567.292	2	1133.58	1133.58	0	-6	1077	Non	302.32	11.88	11.88	1.95	5	>sp|Q8CG48|SMC2_MOUSE Structural maintenance of chromosomes protein 2 OS=Mus musculus OX=10090 GN=Smc2 PE=1 SV=2	36912	controllerType=0 controllerNumber=1 scan=16686	78.5749
08208:2	229	M.LPHVGVSDF.C			485.749	2	970.492	970.499	0	-7.9	348	Non	273.4	58.51	58.51	4.96	3	>sp|Q8CFI7|RPB2_MOUSE DNA-directed RNA polymerase II subunit RPB2 OS=Mus musculus OX=10090 GN=Polr2b PE=1 SV=2	48817	controllerType=0 controllerNumber=1 scan=17051	79.4184
06003:2	229	F.IGPTYYQRL.K			555.798	2	1110.59	1110.59	0	-5.1	1043	Non	262.56	22.19	22.19	4.57	3	>sp|Q8CFI7|RPB2_MOUSE DNA-directed RNA polymerase II subunit RPB2 OS=Mus musculus OX=10090 GN=Polr2b PE=1 SV=2	48817	controllerType=0 controllerNumber=1 scan=13395	67.4635
09158:2	229	L.TFASTLSHL.R			488.755	2	976.502	976.51	0	-8.1	474	Non	179.61	1.54	1.54	1.76	3	>sp|Q8CFI7|RPB2_MOUSE DNA-directed RNA polymerase II subunit RPB2 OS=Mus musculus OX=10090 GN=Polr2b PE=1 SV=2	48817	controllerType=0 controllerNumber=1 scan=18248	81.9662
09748:2	191	A.SFATSLTHL.Y			488.755	2	976.502	976.51	0	-8.4	98	Non	317	86.67	86.67	7.26	1	>sp|Q8CE94|MOT13_MOUSE Monocarboxylate transporter 13 OS=Mus musculus OX=10090 GN=Slc16a13 PE=2 SV=1	47135	controllerType=0 controllerNumber=1 scan=18994	83.5594
04842:2	74	A.TEAKPAPEIFEN.E			673.332	2	1345.66	1345.66	0	-5.3	121	Non	306.58	172.71	172.71	9.25	1	>sp|Q8C6I2|SDHF2_MOUSE Succinate dehydrogenase assembly factor 2, mitochondrial OS=Mus musculus OX=10090 GN=Sdhaf2 PE=1 SV=1	37883	controllerType=0 controllerNumber=1 scan=11632	62.5475
14568:2	125	G.SFNPITGTM[+15.995]L.S		M[+16]	548.767	2	1096.53	1096.53	0	-6.2	140	Non	337.82	99.56	99.56	8.07	1	>sp|Q8C1S0|MED19_MOUSE Mediator of RNA polymerase II transcription subunit 19 OS=Mus musculus OX=10090 GN=Med19 PE=1 SV=1	47727	controllerType=0 controllerNumber=1 scan=25238	97.7376
06184:2	239	Q.YYVENGKLI.S			549.792	2	1098.58	1098.58	0	-4.9	115	Non	296.61	52.33	52.33	6.52	1	>sp|Q8C0V9|FRMD6_MOUSE FERM domain-containing protein 6 OS=Mus musculus OX=10090 GN=Frmd6 PE=1 SV=2	49981	controllerType=0 controllerNumber=1 scan=13668	68.21
07005:2	293	K.KLFSTETSL.Q			513.276	2	1025.54	1025.55	0	-6.8	749	CRagged	314.16	100.91	100.91	5.8	1	>sp|Q8BY46|ZN574_MOUSE Zinc finger protein 574 OS=Mus musculus OX=10090 GN=Znf574 PE=1 SV=1	49304	controllerType=0 controllerNumber=1 scan=14838	71.1959
05510:2	202	F.SYHPSGLSL.H			480.74	2	960.472	960.479	0	-6.8	68	Non	362.39	52.91	52.91	7.09	1	>sp|Q8BXQ8|FA53C_MOUSE Protein FAM53C OS=Mus musculus OX=10090 GN=Fam53c PE=1 SV=1	46256	controllerType=0 controllerNumber=1 scan=12661	65.496
07275:2	418	G.KYQEALDVI.R			539.79	2	1078.57	1078.58	0	-5.5	208	Non	290.37	39.32	39.32	1.46	1	>sp|Q8BWZ3|NAA25_MOUSE N-alpha-acetyltransferase 25, NatB auxiliary subunit OS=Mus musculus OX=10090 GN=Naa25 PE=1 SV=1	47383	controllerType=0 controllerNumber=1 scan=15704	75.8201
05729:2	243	N.LYIDSRQSL.P			547.792	2	1094.58	1094.58	0	-7	552	Non	329.37	31.92	31.92	6.47	1	>sp|Q8BUR3|FOXJ3_MOUSE Forkhead box protein J3 OS=Mus musculus OX=10090 GN=Foxj3 PE=1 SV=1	46797	controllerType=0 controllerNumber=1 scan=12974	66.2625
03974:2	83	G.SRTPAGLAPTNLSSS.R			729.876	2	1458.74	1458.75	0	-7	2308	Non	241.46	105.69	105.69	9.09	3	>sp|Q8BTI8|SRRM2_MOUSE Serine/arginine repetitive matrix protein 2 OS=Mus musculus OX=10090 GN=Srrm2 PE=1 SV=3	38336	controllerType=0 controllerNumber=1 scan=10403	59.4244
06657:2	149	H.VYLPTHTSL.L			515.779	2	1030.55	1030.56	0	-6.3	431	Non	334.82	96.46	96.46	7.97	1	>sp|Q8BM54|MYLIP_MOUSE E3 ubiquitin-protein ligase MYLIP OS=Mus musculus OX=10090 GN=Mylip PE=1 SV=1	48117	controllerType=0 controllerNumber=1 scan=14310	69.6749
06516:2	412	A.EELPHIHAF.E			546.772	2	1092.54	1092.55	0	-9.6	62	Non	260.56	66.01	66.01	1.48	1	>sp|Q8BGS2|BOLA2_MOUSE BolA-like protein 2 OS=Mus musculus OX=10090 GN=Bola2 PE=1 SV=1	41286	controllerType=0 controllerNumber=1 scan=14135	69.3412
13250:2	258	R.SGLGLGITIAFL.A			581.345	2	1161.68	1161.69	0	-4.8	191	CRagged	252.93	78.59	78.59	6.22	1	>sp|Q8BGI3|INSI1_MOUSE Insulin-induced gene 1 protein OS=Mus musculus OX=10090 GN=Insig1 PE=2 SV=1	43182	controllerType=0 controllerNumber=1 scan=23492	93.6009
10094:2	252	N.FYTLTPKEL.G			556.302	2	1111.6	1111.6	0	-6.5	31	Non	278.42	109.81	109.81	6.38	1	>sp|Q8BG48|ST17B_MOUSE Serine/threonine-protein kinase 17B OS=Mus musculus OX=10090 GN=Stk17b PE=1 SV=1	37105	controllerType=0 controllerNumber=1 scan=19453	84.6285
03546:2	332	N.SFHSVDPYNPQN.F			702.808	2	1404.61	1404.62	0	-6	464	Non	215.67	98.92	98.92	3.13	1	>sp|Q8BFW3|PR15B_MOUSE Protein phosphatase 1 regulatory subunit 15B OS=Mus musculus OX=10090 GN=Ppp1r15b PE=1 SV=1	51991	controllerType=0 controllerNumber=1 scan=9763	57.6497
13268:2	80	H.SYNPITNEW.L			562.251	2	1123.49	1123.51	0	-9.4	261	Non	379.54	153.29	153.29	8.65	2	>sp|Q8BFQ9|KLH42_MOUSE Kelch-like protein 42 OS=Mus musculus OX=10090 GN=Klhl42 PE=2 SV=1	46841	controllerType=0 controllerNumber=1 scan=23519	93.6759
03938:2	80	G.GYRITSQEI.S			533.776	2	1066.54	1066.55	0	-7.4	248	Non	254.68	39.75	39.75	3.24	2	>sp|Q8BFQ9|KLH42_MOUSE Kelch-like protein 42 OS=Mus musculus OX=10090 GN=Klhl42 PE=2 SV=1	46841	controllerType=0 controllerNumber=1 scan=10359	59.3381
07706:2	337	L.GYLLDKETL.R			526.283	2	1051.56	1051.57	0	-7	26	Non	312.82	17.64	17.64	3.12	1	>sp|Q80ZJ6|ZER1_MOUSE Protein zer-1 homolog OS=Mus musculus OX=10090 GN=Zer1 PE=1 SV=1	49373	controllerType=0 controllerNumber=1 scan=16401	77.9918
12921:2	109	P.AYLPNGTVL.K			474.26	2	947.512	947.52	0	-8.4	1002	Non	304.73	86.66	86.66	6.38	2	>sp|Q80Y84|KDM5B_MOUSE Lysine-specific demethylase 5B OS=Mus musculus OX=10090 GN=Kdm5b PE=1 SV=1	41592	controllerType=0 controllerNumber=1 scan=23065	92.6391
09670:2	109	A.KYWELQGSTL.K			612.811	2	1224.61	1224.63	0	-9.4	109	Non	243.07	44.98	44.98	5.15	2	>sp|Q80Y84|KDM5B_MOUSE Lysine-specific demethylase 5B OS=Mus musculus OX=10090 GN=Kdm5b PE=1 SV=1	41592	controllerType=0 controllerNumber=1 scan=18890	83.3248
08317:2	425	T.LYTHIVTDI.K			537.79	2	1074.57	1074.58	0	-9	137	Non	307.68	15.96	15.96	1.35	2	>sp|Q80UZ2|SDA1_MOUSE Protein SDA1 homolog OS=Mus musculus OX=10090 GN=Sdad1 PE=1 SV=1	38123	controllerType=0 controllerNumber=1 scan=17184	79.6722
07235:2	79	Q.SYVESLRTL.M			534.287	2	1067.57	1067.57	0	-5.7	1073	Non	400.37	92.49	92.49	9.13	1	>sp|Q80U35|ARHGH_MOUSE Rho guanine nucleotide exchange factor 17 OS=Mus musculus OX=10090 GN=Arhgef17 PE=1 SV=2	50376	controllerType=0 controllerNumber=1 scan=15609	75.3948
05143:2	150	R.VYNQLRASL.Q			532.295	2	1063.58	1063.59	0	-6.4	997	CRagged	294.71	143.16	143.16	7.97	2	>sp|Q80TM9|NISCH_MOUSE Nischarin OS=Mus musculus OX=10090 GN=Nisch PE=1 SV=2	49927	controllerType=0 controllerNumber=1 scan=12060	63.6288
09826:2	272	V.KYITTLEDL.H			548.295	2	1095.58	1095.59	0	-9.1	140	Non	306.26	75.89	75.89	6.07	2	>sp|Q7TN22|TXD16_MOUSE Thioredoxin domain-containing protein 16 OS=Mus musculus OX=10090 GN=Txndc16 PE=2 SV=1	43623	controllerType=0 controllerNumber=1 scan=19094	83.7775
13133:2	195	S.FYIGLGSRI.N			513.288	2	1025.57	1025.58	0	-8.7	110	Non	290.92	56.83	56.83	7.19	1	>sp|Q7M759|AB17B_MOUSE Alpha/beta hydrolase domain-containing protein 17B OS=Mus musculus OX=10090 GN=Abhd17b PE=1 SV=1	52295	controllerType=0 controllerNumber=1 scan=23341	93.2626
05268:2	24	W.KYLSVQGQL.F			518.292	2	1035.58	1035.58	0	-6.3	361	Non	386.21	129.58	129.58	8.85	3	>sp|Q791T5|MTCH1_MOUSE Mitochondrial carrier homolog 1 OS=Mus musculus OX=10090 GN=Mtch1 PE=1 SV=1	48130	controllerType=0 controllerNumber=1 scan=12273	64.3386
10651:2	24	W.KYLSVQGQLF.R			591.824	2	1182.64	1182.65	0	-9	361	Non	240.58	70.56	70.56	5.73	3	>sp|Q791T5|MTCH1_MOUSE Mitochondrial carrier homolog 1 OS=Mus musculus OX=10090 GN=Mtch1 PE=1 SV=1	48130	controllerType=0 controllerNumber=1 scan=20165	86.2076
07023:2	24	A.KYSGVLSSI.G			477.265	2	953.524	953.53	0	-6.7	232	Non	289.22	42.67	42.67	4.19	3	>sp|Q791T5|MTCH1_MOUSE Mitochondrial carrier homolog 1 OS=Mus musculus OX=10090 GN=Mtch1 PE=1 SV=1	48130	controllerType=0 controllerNumber=1 scan=14862	71.2492
15380:2	314	V.SYWSVGETI.A			521.243	2	1041.48	1041.49	0	-9	184	Non	310.03	75.39	75.39	5.4	1	>sp|Q78IS1|TMED3_MOUSE Transmembrane emp24 domain-containing protein 3 OS=Mus musculus OX=10090 GN=Tmed3 PE=1 SV=1	44124	controllerType=0 controllerNumber=1 scan=26413	100.899
06417:2	352	K.KYFNSYTLT.G			568.781	2	1136.55	1136.56	0	-7	17	CRagged	279.55	54.68	54.68	2.42	1	>sp|Q78IK2|USMG5_MOUSE Up-regulated during skeletal muscle growth protein 5 OS=Mus musculus OX=10090 GN=Usmg5 PE=1 SV=1	44047	controllerType=0 controllerNumber=1 scan=13991	68.9722
11040:2	315	T.GYIQQINNL.K			531.779	2	1062.55	1062.56	0	-7.4	428	Non	286.31	64.57	64.57	5.4	1	>sp|Q6PCX9|TRI37_MOUSE E3 ubiquitin-protein ligase TRIM37 OS=Mus musculus OX=10090 GN=Trim37 PE=1 SV=1	43479	controllerType=0 controllerNumber=1 scan=20657	87.2809
05898:2	367	R.KYLGQLHYL.Q			567.815	2	1134.62	1134.63	0	-7.3	70	CRagged	270.05	107.84	107.84	2.04	1	>sp|Q6PB44|PTN23_MOUSE Tyrosine-protein phosphatase non-receptor type 23 OS=Mus musculus OX=10090 GN=Ptpn23 PE=1 SV=2	53327	controllerType=0 controllerNumber=1 scan=13227	66.9537
06412:2	81	A.AISKLYSTI.R			498.289	2	995.571	995.577	0	-5.9	769	Non	365.84	97.94	97.94	9.09	2	>sp|Q6P5B0|RRP12_MOUSE RRP12-like protein OS=Mus musculus OX=10090 GN=Rrp12 PE=1 SV=1	49034	controllerType=0 controllerNumber=1 scan=13985	68.9597
11329:2	283	G.SFNPAISNI.F			481.747	2	962.487	962.494	0	-7.6	88	Non	323.79	5.73	5.73	5.94	1	>sp|Q6P3Y5|Z280C_MOUSE Zinc finger protein 280C OS=Mus musculus OX=10090 GN=Znf280c PE=1 SV=1	49249	controllerType=0 controllerNumber=1 scan=21025	88.0916
06530:2	249	L.LYKDGFSTI.L			522.27	2	1043.53	1043.54	0	-7.4	428	Non	281.56	66.05	66.05	6.41	1	>sp|Q6NVG1|LPCT4_MOUSE Lysophospholipid acyltransferase LPCAT4 OS=Mus musculus OX=10090 GN=Lpcat4 PE=1 SV=1	47914	controllerType=0 controllerNumber=1 scan=14153	69.3817
05724:2	227	V.LGPLKSAQEL.R			528.304	2	1055.6	1055.61	0	-7.7	688	Non	291.33	54.02	54.02	6.6	1	>sp|Q6GQT9|NOMO1_MOUSE Nodal modulator 1 OS=Mus musculus OX=10090 GN=Nomo1 PE=1 SV=1	49813	controllerType=0 controllerNumber=1 scan=12966	66.2413
10102:2	339	E.KFVTDIDEL.G			540.281	2	1079.56	1079.56	0	-6.4	264	Non	275.14	59.11	59.11	3.09	1	>sp|Q64261|CDK6_MOUSE Cyclin-dependent kinase 6 OS=Mus musculus OX=10090 GN=Cdk6 PE=1 SV=2	40508	controllerType=0 controllerNumber=1 scan=19467	84.6771
13083:2	187	S.AYNPLPLTRL.E			579.333	2	1157.66	1157.67	0	-7.5	1608	Non	260.49	65.64	65.64	7.33	3	>sp|Q62388|ATM_MOUSE Serine-protein kinase ATM OS=Mus musculus OX=10090 GN=Atm PE=1 SV=2	46769	controllerType=0 controllerNumber=1 scan=23276	93.1172
10066:2	174	D.SYIEVLDGSRV.H			619.32	2	1237.63	1237.64	0	-7.5	1048	Non	275.28	93.66	93.66	7.61	1	>sp|Q62383|SPT6H_MOUSE Transcription elongation factor SPT6 OS=Mus musculus OX=10090 GN=Supt6h PE=1 SV=2	37232	controllerType=0 controllerNumber=1 scan=19413	84.5306
05104:2	251	H.IYVEQKQYI.S			592.317	2	1183.63	1183.64	0	-7.4	690	Non	289.9	74.22	74.22	6.41	2	>sp|Q62018|CTR9_MOUSE RNA polymerase-associated protein CTR9 homolog OS=Mus musculus OX=10090 GN=Ctr9 PE=1 SV=2	40009	controllerType=0 controllerNumber=1 scan=11990	63.391
04916:2	73	A.TYTSARTLL.A			513.281	2	1025.56	1025.56	0	-6.9	599	Non	340.77	89.44	89.44	8.3	2	>sp|Q61881|MCM7_MOUSE DNA replication licensing factor MCM7 OS=Mus musculus OX=10090 GN=Mcm7 PE=1 SV=1	47689	controllerType=0 controllerNumber=1 scan=11733	62.7873
05220:2	73	T.GFQQM[+15.995]AQGL.L		M[+16]	498.231	2	995.455	995.462	0	-6.9	284	Non	273.05	13.34	13.34	3.62	2	>sp|Q61881|MCM7_MOUSE DNA replication licensing factor MCM7 OS=Mus musculus OX=10090 GN=Mcm7 PE=1 SV=1	47689	controllerType=0 controllerNumber=1 scan=12203	64.1513
09848:2	423	L.KYYELYETI.G			611.3	2	1221.59	1221.6	0	-8.8	9	Non	274.85	13.33	13.33	1.4	2	>sp|Q61846|MELK_MOUSE Maternal embryonic leucine zipper kinase OS=Mus musculus OX=10090 GN=Melk PE=1 SV=2	47201	controllerType=0 controllerNumber=1 scan=19124	83.8548
03678:2	190	K.IGPIKNEQQL.F			570.321	2	1139.64	1139.64	0	-6	251	CRagged	277.53	89.62	89.62	7.05	2	>sp|Q61216|MRE11_MOUSE Double-strand break repair protein MRE11 OS=Mus musculus OX=10090 GN=Mre11 PE=1 SV=1	48216	controllerType=0 controllerNumber=1 scan=9945	58.0822
08891:2	190	K.IGPIKNEQQLF.Y			643.853	2	1286.7	1286.71	0	-8.6	251	CRagged	184.31	33.25	33.25	2.82	2	>sp|Q61216|MRE11_MOUSE Double-strand break repair protein MRE11 OS=Mus musculus OX=10090 GN=Mre11 PE=1 SV=1	48216	controllerType=0 controllerNumber=1 scan=17914	81.2702
05694:2	417	A.SFLHGNASL.L			473.24	2	945.472	945.479	0	-6.7	599	Non	295.89	27.4	27.4	1.46	1	>sp|Q61140|BCAR1_MOUSE Breast cancer anti-estrogen resistance protein 1 OS=Mus musculus OX=10090 GN=Bcar1 PE=1 SV=2	39385	controllerType=0 controllerNumber=1 scan=12924	66.1412
07476:2	357	N.AGGHKLGLGLEFQA.-			699.376	2	1397.75	1397.75	0	-5.7	283	Non	234.1	121.22	121.22	2.19	1	>sp|Q60932|VDAC1_MOUSE Voltage-dependent anion-selective channel protein 1 OS=Mus musculus OX=10090 GN=Vdac1 PE=1 SV=3	44063	controllerType=0 controllerNumber=1 scan=16095	77.2868
12191:2	46	N.SLGIPVPAAAGAQQ.-			640.349	2	1279.69	1279.7	0	-7.5	378	Non	408.16	275.85	275.85	10.32	1	>sp|Q60737|CSK21_MOUSE Casein kinase II subunit alpha OS=Mus musculus OX=10090 GN=Csnk2a1 PE=1 SV=2	39831	controllerType=0 controllerNumber=1 scan=22143	90.6009
08959:2	60	V.TYQLGFHSI.E			533.268	2	1065.53	1065.54	0	-7.5	93	Non	414.54	181.86	181.86	9.47	1	>sp|Q60692|PSB6_MOUSE Proteasome subunit beta type-6 OS=Mus musculus OX=10090 GN=Psmb6 PE=1 SV=3	48831	controllerType=0 controllerNumber=1 scan=17998	81.4391
08555:2	173	S.SYNYIRVGAQL.K			642.336	2	1283.66	1283.67	0	-7.8	227	Non	266.06	89.27	89.27	7.61	1	>sp|Q5SYD0|MYO1D_MOUSE Unconventional myosin-Id OS=Mus musculus OX=10090 GN=Myo1d PE=1 SV=1	47534	controllerType=0 controllerNumber=1 scan=17489	80.3224
11525:2	306	A.SYSVTEVQL.R			513.258	2	1025.51	1025.52	0	-6.4	410	Non	309.59	56.11	56.11	5.51	1	>sp|Q5SXJ3|FANCJ_MOUSE Fanconi anemia group J protein homolog OS=Mus musculus OX=10090 GN=Brip1 PE=2 SV=1	46075	controllerType=0 controllerNumber=1 scan=21295	88.7506
06257:2	419	E.SYLHSLQEV.T			538.271	2	1075.53	1075.54	0	-6.6	29	Non	291.97	0.17	0.17	1.46	1	>sp|Q5SSZ5|TENS3_MOUSE Tensin-3 OS=Mus musculus OX=10090 GN=Tns3 PE=1 SV=1	38900	controllerType=0 controllerNumber=1 scan=13784	68.5517
07102:2	88	K.QYQQIINRL.F			588.327	2	1175.65	1175.65	0	-4.8	538	CRagged	380.47	154.72	154.72	8.92	1	>sp|Q5I1X5|IASPP_MOUSE RelA-associated inhibitor OS=Mus musculus OX=10090 GN=Ppp1r13l PE=1 SV=1	43336	controllerType=0 controllerNumber=1 scan=15018	71.8701
08143:2	164	T.DVSAPARSFQI.Q			595.808	2	1190.61	1190.62	0	-5.9	798	Non	294.41	49.32	49.32	7.85	1	>sp|Q5H8C4|VP13A_MOUSE Vacuolar protein sorting-associated protein 13A OS=Mus musculus OX=10090 GN=Vps13a PE=1 SV=1	44727	controllerType=0 controllerNumber=1 scan=16965	79.2284
08962:2	325	L.DTETEQVKGLF.-			633.81	2	1266.61	1266.62	0	-7.3	967	Non	291.27	40.45	40.45	3.25	4	>sp|Q3V3R1|C1TM_MOUSE Monofunctional C1-tetrahydrofolate synthase, mitochondrial OS=Mus musculus OX=10090 GN=Mthfd1l PE=1 SV=2	40904	controllerType=0 controllerNumber=1 scan=18001	81.4444
15684:2	382	T.VWAVSLLLASL.P			586.355	2	1171.7	1171.71	0	-5.4	158	Non	233.28	48.8	48.8	1.93	2	>sp|Q3UVY1|GP149_MOUSE Probable G-protein coupled receptor 149 OS=Mus musculus OX=10090 GN=Gpr149 PE=1 SV=1	45587	controllerType=0 controllerNumber=1 scan=26833	101.971
08076:2	97	D.SYLVSKQELL.E			590.33	2	1179.65	1179.66	0	-8.7	347	Non	399.78	65.34	65.34	8.77	1	>sp|Q3UM18|LSG1_MOUSE Large subunit GTPase 1 homolog OS=Mus musculus OX=10090 GN=Lsg1 PE=1 SV=2	48024	controllerType=0 controllerNumber=1 scan=16878	79.0394
11016:2	61	L.YYLQIHPQEL.R			652.332	2	1303.66	1303.67	0	-8.8	517	Non	363.4	150.14	150.14	9.46	1	>sp|Q3U1J4|DDB1_MOUSE DNA damage-binding protein 1 OS=Mus musculus OX=10090 GN=Ddb1 PE=1 SV=2	39040	controllerType=0 controllerNumber=1 scan=20628	87.2238
05548:2	155	A.YSFGRTTI.A			472.742	2	944.478	944.484	0	-6.4	188	Non	338.56	53.68	53.68	7.9	2	>sp|Q3TWI9|CSCL2_MOUSE CSC1-like protein 2 OS=Mus musculus OX=10090 GN=Tmem63b PE=1 SV=1	50497	controllerType=0 controllerNumber=1 scan=12710	65.5846
11200:2	78	T.NYTSVLTNV.G			505.757	2	1010.51	1010.52	0	-7.5	419	Non	422.64	146.2	146.2	9.16	1	>sp|Q3TDD9|PPR21_MOUSE Protein phosphatase 1 regulatory subunit 21 OS=Mus musculus OX=10090 GN=Ppp1r21 PE=1 SV=2	52057	controllerType=0 controllerNumber=1 scan=20856	87.7035
11395:2	289	L.SFVDTRTLL.L			526.289	2	1051.57	1051.58	0	-7.2	3	Non	307.19	69.48	69.48	5.82	2	>sp|Q01149|CO1A2_MOUSE Collagen alpha-2(I) chain OS=Mus musculus OX=10090 GN=Col1a2 PE=1 SV=2	39572	controllerType=0 controllerNumber=1 scan=21118	88.3165
04707:2	403	G.HYWPVHNEL.A			597.784	2	1194.56	1194.57	0	-6.8	299	Non	262.36	51.62	51.62	1.6	1	>sp|P97471|SMAD4_MOUSE Mothers against decapentaplegic homolog 4 OS=Mus musculus OX=10090 GN=Smad4 PE=1 SV=2	37171	controllerType=0 controllerNumber=1 scan=11453	62.1352
07034:2	112	G.KYLGINSDGL.V			540.287	2	1079.57	1079.57	0	-6.6	115	Non	382.55	72.75	72.75	8.55	1	>sp|P97376|FRG1_MOUSE Protein FRG1 OS=Mus musculus OX=10090 GN=Frg1 PE=1 SV=2	49977	controllerType=0 controllerNumber=1 scan=14876	71.2791
07281:2	198	T.YYIKNGIQI.F			556.308	2	1111.61	1111.61	0	-6.1	3102	Non	261.92	109.27	109.27	7.17	3	>sp|P97313|PRKDC_MOUSE DNA-dependent protein kinase catalytic subunit OS=Mus musculus OX=10090 GN=Prkdc PE=1 SV=3	52178	controllerType=0 controllerNumber=1 scan=15716	75.8661
09000:2	104	D.SYASVIKAL.E			476.275	2	951.543	951.551	0	-8.4	313	Non	338.87	92.41	92.41	8.67	1	>sp|P70698|PYRG1_MOUSE CTP synthase 1 OS=Mus musculus OX=10090 GN=Ctps1 PE=1 SV=2	53350	controllerType=0 controllerNumber=1 scan=18051	81.5574
02818:2	389	E.VLEETVQTM[+15.995]DTS.-		M[+16]	684.809	2	1368.61	1368.62	0	-6.3	266	Non	211.49	95.2	95.2	1.31	2	>sp|P70195|PSB7_MOUSE Proteasome subunit beta type-7 OS=Mus musculus OX=10090 GN=Psmb7 PE=1 SV=1	52162	controllerType=0 controllerNumber=1 scan=8695	54.6728
06206:2	116	I.TYLPAGQSV.L			468.242	2	935.476	935.483	0	-7.6	258	Non	384.14	112.19	112.19	8.08	2	>sp|P67778|PHB_MOUSE Prohibitin OS=Mus musculus OX=10090 GN=Phb PE=1 SV=1	50987	controllerType=0 controllerNumber=1 scan=13701	68.2996
12274:2	116	I.TYLPAGQSVL.L			524.784	2	1048.56	1048.57	0	-7.2	258	Non	214.45	19.04	19.04	2.84	2	>sp|P67778|PHB_MOUSE Prohibitin OS=Mus musculus OX=10090 GN=Phb PE=1 SV=1	50987	controllerType=0 controllerNumber=1 scan=22245	90.8144
12730:2	353	D.NYVPEVSAL.D			496.253	2	991.5	991.51	0	-10	83	Non	271.11	49.16	49.16	2.42	2	>sp|P63276|RS17_MOUSE 40S ribosomal protein S17 OS=Mus musculus OX=10090 GN=Rps17 PE=1 SV=2	48675	controllerType=0 controllerNumber=1 scan=22814	92.0447
07006:2	29	T.TSYQQISGVQQIQ.F			740.371	2	1479.73	1479.74	0	-6.7	193	Non	371.8	199.9	199.9	10.99	2	>sp|P63139|NFYB_MOUSE Nuclear transcription factor Y subunit beta OS=Mus musculus OX=10090 GN=Nfyb PE=1 SV=1	53250	controllerType=0 controllerNumber=1 scan=14839	71.1979
07301:2	29	T.SYQQISGVQQI.Q			625.819	2	1250.63	1250.64	0	-5.3	194	Non	233.46	18.78	18.78	3.87	2	>sp|P63139|NFYB_MOUSE Nuclear transcription factor Y subunit beta OS=Mus musculus OX=10090 GN=Nfyb PE=1 SV=1	53250	controllerType=0 controllerNumber=1 scan=15757	76.0245
02789:2	316	V.VYNASNNEL.V			512.238	2	1023.47	1023.47	0	-5	82	Non	278.69	89.35	89.35	5.37	1	>sp|P62242|RS8_MOUSE 40S ribosomal protein S8 OS=Mus musculus OX=10090 GN=Rps8 PE=1 SV=2	48677	controllerType=0 controllerNumber=1 scan=8637	54.4459
06366:2	399	N.KYIDQGVAEL.V			568.3	2	1135.59	1135.6	0	-6.2	285	Non	298.7	7.05	7.05	1.64	2	>sp|P60122|RUVB1_MOUSE RuvB-like 1 OS=Mus musculus OX=10090 GN=Ruvbl1 PE=1 SV=1	38423	controllerType=0 controllerNumber=1 scan=13923	68.8231
12231:2	10	D.SGAPIKIPVGPETLG.R			718.406	2	1435.8	1435.82	0	-7.8	128	Non	362.8	209.93	209.93	12.77	4	>sp|P56480|ATPB_MOUSE ATP synthase subunit beta, mitochondrial OS=Mus musculus OX=10090 GN=Atp5f1b PE=1 SV=2	46788	controllerType=0 controllerNumber=1 scan=22190	90.697
07175:2	10	V.TGIKVVDL.L			422.758	2	844.509	844.514	0	-5.5	185	Non	358.17	35.96	35.96	5.69	4	>sp|P56480|ATPB_MOUSE ATP synthase subunit beta, mitochondrial OS=Mus musculus OX=10090 GN=Atp5f1b PE=1 SV=2	46788	controllerType=0 controllerNumber=1 scan=15382	74.1167
04455:2	10	G.KLVPLKETI.K			520.836	2	1040.66	1040.67	0	-6.5	480	Non	288.7	11.52	11.52	5.02	4	>sp|P56480|ATPB_MOUSE ATP synthase subunit beta, mitochondrial OS=Mus musculus OX=10090 GN=Atp5f1b PE=1 SV=2	46788	controllerType=0 controllerNumber=1 scan=11106	61.2902
03060:3	10	V.IGEPIDERGPIKT.K			475.593	3	1424.76	1424.77	0	-7.2	148	Non	127.8	26.35	26.35	3.32	4	>sp|P56480|ATPB_MOUSE ATP synthase subunit beta, mitochondrial OS=Mus musculus OX=10090 GN=Atp5f1b PE=1 SV=2	46788	controllerType=0 controllerNumber=1 scan=9043	55.6198
04692:2	148	D.YYQSGRM[+15.995]LL.R		M[+16]	573.78	2	1146.55	1146.56	0	-7.6	357	Non	296.53	84.41	84.41	7.59	1	>sp|P55096|ABCD3_MOUSE ATP-binding cassette sub-family D member 3 OS=Mus musculus OX=10090 GN=Abcd3 PE=1 SV=2	52989	controllerType=0 controllerNumber=1 scan=11434	62.0925
06966:2	396	Q.SYENM[+15.995]VTEI.M		M[+16]	551.239	2	1101.47	1101.48	0	-5.8	189	Non	302.02	40.38	40.38	1.37	1	>sp|P54728|RD23B_MOUSE UV excision repair protein RAD23 homolog B OS=Mus musculus OX=10090 GN=Rad23b PE=1 SV=2	36650	controllerType=0 controllerNumber=1 scan=14773	70.9848
09159:2	290	S.VYKASLNLI.E			510.804	2	1020.6	1020.61	0	-7.9	484	Non	311.76	54.5	54.5	5.82	1	>sp|P52293|IMA1_MOUSE Importin subunit alpha-1 OS=Mus musculus OX=10090 GN=Kpna2 PE=1 SV=2	43165	controllerType=0 controllerNumber=1 scan=18249	81.9698
10986:2	276	L.KYQQLFEDI.R			592.298	2	1183.59	1183.6	0	-8.9	818	Non	291.51	76.94	76.94	6.07	1	>sp|P49717|MCM4_MOUSE DNA replication licensing factor MCM4 OS=Mus musculus OX=10090 GN=Mcm4 PE=1 SV=1	47815	controllerType=0 controllerNumber=1 scan=20589	87.1331
08324:2	49	R.SVGGSGGGSFGDNLVT.R			705.823	2	1410.64	1410.65	0	-7.8	629	CRagged	359.78	226.25	226.25	10.05	1	>sp|P48678|LMNA_MOUSE Prelamin-A/C OS=Mus musculus OX=10090 GN=Lmna PE=1 SV=2	47447	controllerType=0 controllerNumber=1 scan=17193	79.6893
06455:2	183	E.AFQKTLTDL.K			518.784	2	1036.56	1036.57	0	-5.9	92	Non	451.15	10.12	10.12	7.35	1	>sp|P45377|ALD2_MOUSE Aldose reductase-related protein 2 OS=Mus musculus OX=10090 GN=Akr1b8 PE=1 SV=2	52487	controllerType=0 controllerNumber=1 scan=14053	69.1545
08458:2	410	G.ATSALAPKIGPLG.L			598.352	2	1195.7	1195.7	0	-5.6	24	Non	209.53	33.03	33.03	1.54	1	>sp|P35979|RL12_MOUSE 60S ribosomal protein L12 OS=Mus musculus OX=10090 GN=Rpl12 PE=1 SV=2	48721	controllerType=0 controllerNumber=1 scan=17368	80.0756
11957:2	163	A.TADPEPPLEELG.Y			634.301	2	1267.6	1267.61	0	-8	354	Non	291.35	89.89	89.89	7.84	1	>sp|P35486|ODPA_MOUSE Pyruvate dehydrogenase E1 component subunit alpha, somatic form, mitochondrial OS=Mus musculus OX=10090 GN=Pdha1 PE=1 SV=1	51845	controllerType=0 controllerNumber=1 scan=21841	89.9478
11105:2	303	V.KYWPDEYAL.K			592.78	2	1184.55	1184.56	0	-8.7	369	Non	278.22	70.98	70.98	5.54	2	>sp|P35235|PTN11_MOUSE Tyrosine-protein phosphatase non-receptor type 11 OS=Mus musculus OX=10090 GN=Ptpn11 PE=1 SV=2	53444	controllerType=0 controllerNumber=1 scan=20738	87.454
05161:2	154	Q.SYKIPASGI.S			468.26	2	935.514	935.52	0	-6.3	400	Non	335.27	81.23	81.23	7.9	1	>sp|P33610|PRI2_MOUSE DNA primase large subunit OS=Mus musculus OX=10090 GN=Prim2 PE=1 SV=1	52180	controllerType=0 controllerNumber=1 scan=12092	63.7365
06709:2	205	L.KYIEGVSDF.N			529.26	2	1057.51	1057.52	0	-6.8	238	Non	316.62	82.74	82.74	6.97	1	>sp|P28575|IPP_MOUSE Actin-binding protein IPP OS=Mus musculus OX=10090 GN=Ipp PE=2 SV=3	42407	controllerType=0 controllerNumber=1 scan=14375	69.8052
04637:2	181	V.GYVETPRGL.R			496.261	2	991.514	991.521	0	-6.5	91	Non	304.42	62.1	62.1	7.31	2	>sp|P27659|RL3_MOUSE 60S ribosomal protein L3 OS=Mus musculus OX=10090 GN=Rpl3 PE=1 SV=3	36885	controllerType=0 controllerNumber=1 scan=11358	61.9087
11032:2	181	R.LLPLR.Q			306.214	2	611.421	611.424	0	-4.9	170	Specific	170.38	170.38	170.38	1.93	2	>sp|P27659|RL3_MOUSE 60S ribosomal protein L3 OS=Mus musculus OX=10090 GN=Rpl3 PE=1 SV=3	36885	controllerType=0 controllerNumber=1 scan=20647	87.2627
11788:2	298	K.HGGTIPVVPTAEF.Q			662.843	2	1324.68	1324.69	0	-8.1	481	CRagged	210.66	101.59	101.59	5.64	1	>sp|P26443|DHE3_MOUSE Glutamate dehydrogenase 1, mitochondrial OS=Mus musculus OX=10090 GN=Glud1 PE=1 SV=1	46419	controllerType=0 controllerNumber=1 scan=21630	89.505
07556:2	137	S.GYLSSERLI.P			519.281	2	1037.56	1037.56	0	-6.8	145	Non	375.13	80.5	80.5	8.22	1	>sp|P26040|EZRI_MOUSE Ezrin OS=Mus musculus OX=10090 GN=Ezr PE=1 SV=3	45402	controllerType=0 controllerNumber=1 scan=16208	77.5749
08468:2	75	F.GYFEVTHDI.T			540.75	2	1080.49	1080.5	0	-7.3	83	Non	376.85	130.18	130.18	9.22	1	>sp|P24270|CATA_MOUSE Catalase OS=Mus musculus OX=10090 GN=Cat PE=1 SV=4	41124	controllerType=0 controllerNumber=1 scan=17381	80.0996
04838:2	285	S.YYLESRSI.N			515.76	2	1030.51	1030.52	0	-7.2	55	Non	288.42	26.95	26.95	5.88	1	>sp|P22518|CLK1_MOUSE Dual specificity protein kinase CLK1 OS=Mus musculus OX=10090 GN=Clk1 PE=1 SV=2	40219	controllerType=0 controllerNumber=1 scan=11628	62.5401
09697:2	172	K.YYLTDVDRI.A			579.292	2	1157.58	1157.58	0	-5.5	159	CRagged	358.73	56.41	56.41	7.63	1	>sp|P21278|GNA11_MOUSE Guanine nucleotide-binding protein subunit alpha-11 OS=Mus musculus OX=10090 GN=Gna11 PE=1 SV=1	42514	controllerType=0 controllerNumber=1 scan=18926	83.4027
03311:3	340	Q.GPGPSRDYNHYF.K			470.543	3	1409.61	1409.62	0	-6.9	123	Non	174.31	66.5	66.5	3.06	2	>sp|P19001|K1C19_MOUSE Keratin, type I cytoskeletal 19 OS=Mus musculus OX=10090 GN=Krt19 PE=1 SV=1	42288	controllerType=0 controllerNumber=1 scan=9407	56.6261
09330:2	422	S.KGPLQSVQVF.G			551.812	2	1102.62	1102.63	0	-7.6	4	Non	237.25	59.26	59.26	1.4	1	>sp|P14131|RS16_MOUSE 40S ribosomal protein S16 OS=Mus musculus OX=10090 GN=Rps16 PE=1 SV=4	49005	controllerType=0 controllerNumber=1 scan=18464	82.4171
09152:2	277	R.YYKPGLLLM[+15.995].C		M[+16]	557.301	2	1113.59	1113.6	0	-6.5	216	CRagged	278.53	83.13	83.13	5.65	1	>sp|P13011|ACOD2_MOUSE Acyl-CoA desaturase 2 OS=Mus musculus OX=10090 GN=Scd2 PE=1 SV=2	52565	controllerType=0 controllerNumber=1 scan=18241	81.9527
06288:2	14	S.TPEELGLDKV.-			550.792	2	1100.58	1100.58	0	-5.8	137	Non	390.75	142.66	142.66	9.36	2	>sp|P12787|COX5A_MOUSE Cytochrome c oxidase subunit 5A, mitochondrial OS=Mus musculus OX=10090 GN=Cox5a PE=1 SV=2	39631	controllerType=0 controllerNumber=1 scan=13823	68.6312
09386:2	14	G.ISTPEELGLDKV.-			650.849	2	1300.69	1300.7	0	-6.9	135	Non	313.72	126.29	126.29	8.34	2	>sp|P12787|COX5A_MOUSE Cytochrome c oxidase subunit 5A, mitochondrial OS=Mus musculus OX=10090 GN=Cox5a PE=1 SV=2	39631	controllerType=0 controllerNumber=1 scan=18533	82.5687
07030:2	2	R.SFTSGPGARISSSSF.S			744.355	2	1487.7	1487.71	0	-6	24	CRagged	431.96	263.47	263.47	12.18	3	>sp|P11679|K2C8_MOUSE Keratin, type II cytoskeletal 8 OS=Mus musculus OX=10090 GN=Krt8 PE=1 SV=4	41643	controllerType=0 controllerNumber=1 scan=14871	71.2696
13524:2	2	S.SSYGGLTSPGFSY.G			661.793	2	1322.58	1322.59	0	-8.4	431	Non	384.24	224.76	224.76	11.15	3	>sp|P11679|K2C8_MOUSE Keratin, type II cytoskeletal 8 OS=Mus musculus OX=10090 GN=Krt8 PE=1 SV=4	41643	controllerType=0 controllerNumber=1 scan=23850	94.4238
06408:2	2	M.SSFQPGFGSAGGSNT.F			700.804	2	1400.6	1400.61	0	-5.1	446	Non	235.79	66.27	66.27	5.86	3	>sp|P11679|K2C8_MOUSE Keratin, type II cytoskeletal 8 OS=Mus musculus OX=10090 GN=Krt8 PE=1 SV=4	41643	controllerType=0 controllerNumber=1 scan=13980	68.9523
03571:2	30	K.SAVTTVVNPKYEG.K			682.852	2	1364.7	1364.71	0	-5.7	785	CRagged	437.14	254.38	254.38	11.58	2	>sp|P09055|ITB1_MOUSE Integrin beta-1 OS=Mus musculus OX=10090 GN=Itgb1 PE=1 SV=1	41455	controllerType=0 controllerNumber=1 scan=9802	57.7664
01414:2	30	K.SAVTTVVNPKYEGK.-			746.897	2	1492.79	1492.8	0	-9.5	785	Specific	133.78	84.67	84.67	2.82	2	>sp|P09055|ITB1_MOUSE Integrin beta-1 OS=Mus musculus OX=10090 GN=Itgb1 PE=1 SV=1	41455	controllerType=0 controllerNumber=1 scan=6529	47.8952
11944:2	45	A.YYLNDLERI.A			599.804	2	1198.6	1198.61	0	-7.3	155	Non	284.46	97.79	97.79	7.59	5	>sp|P08752|GNAI2_MOUSE Guanine nucleotide-binding protein G(i) subunit alpha-2 OS=Mus musculus OX=10090 GN=Gnai2 PE=1 SV=5	42097	controllerType=0 controllerNumber=1 scan=21823	89.9029
04441:2	45	N.KYDEAASYI.Q			530.249	2	1059.49	1059.5	0	-7.5	296	Non	292.46	44.63	44.63	5.49	5	>sp|P08752|GNAI2_MOUSE Guanine nucleotide-binding protein G(i) subunit alpha-2 OS=Mus musculus OX=10090 GN=Gnai2 PE=1 SV=5	42097	controllerType=0 controllerNumber=1 scan=11084	61.2209
08314:2	45	A.SYIQSKFEDL.N			615.3	2	1229.59	1229.6	0	-9.8	302	Non	221.7	8.31	8.31	3.09	5	>sp|P08752|GNAI2_MOUSE Guanine nucleotide-binding protein G(i) subunit alpha-2 OS=Mus musculus OX=10090 GN=Gnai2 PE=1 SV=5	42097	controllerType=0 controllerNumber=1 scan=17180	79.6665
05208:2	11	K.TWTAADM[+15.995]AAQITR.R		M[+16]	726.346	2	1451.69	1451.69	0	-6.4	156	Specific	442.04	217.43	217.43	9.89	4	>sp|P01897|HA1L_MOUSE H-2 class I histocompatibility antigen, L-D alpha chain OS=Mus musculus OX=10090 GN=H2-L PE=1 SV=2	45950	controllerType=0 controllerNumber=1 scan=12182	64.0788
11312:2	11	K.TWTAADMAAQITR.R			718.347	2	1435.69	1435.7	0	-8.4	156	Specific	336.14	169.12	169.12	8.78	4	>sp|P01897|HA1L_MOUSE H-2 class I histocompatibility antigen, L-D alpha chain OS=Mus musculus OX=10090 GN=H2-L PE=1 SV=2	45950	controllerType=0 controllerNumber=1 scan=21003	88.044
04717:2	11	V.GYVDNKEFV.R			535.758	2	1070.51	1070.52	0	-6.8	50	Non	236.64	63.5	63.5	3.81	4	>sp|P01897|HA1L_MOUSE H-2 class I histocompatibility antigen, L-D alpha chain OS=Mus musculus OX=10090 GN=H2-L PE=1 SV=2	45950	controllerType=0 controllerNumber=1 scan=11466	62.1622
08601:2	11	Q.EGPEYWERI.T			589.772	2	1178.54	1178.55	0	-9.2	79	Non	199.28	29.32	29.32	1.92	4	>sp|P01897|HA1L_MOUSE H-2 class I histocompatibility antigen, L-D alpha chain OS=Mus musculus OX=10090 GN=H2-L PE=1 SV=2	45950	controllerType=0 controllerNumber=1 scan=17547	80.452
04135:2	8	A.IQKTPQIQVYS.R			652.86	2	1304.71	1304.72	0	-6.2	21	Non	388.74	183.33	183.33	10.96	2	>sp|P01887|B2MG_MOUSE Beta-2-microglobulin OS=Mus musculus OX=10090 GN=B2m PE=1 SV=2	39731	controllerType=0 controllerNumber=1 scan=10629	59.9679
05061:2	8	A.IQKTPQIQVY.S			609.345	2	1217.68	1217.69	0	-5.9	21	Non	363.03	183.08	183.08	10.61	2	>sp|P01887|B2MG_MOUSE Beta-2-microglobulin OS=Mus musculus OX=10090 GN=B2m PE=1 SV=2	39731	controllerType=0 controllerNumber=1 scan=11924	63.2063
12252:2	3	N.TEPVLDSDGSYFM[+15.995].Y		M[+16]	738.808	2	1476.61	1476.62	0	-7	277	Non	412.82	233.05	233.05	11.62	3	>sp|P01863|GCAA_MOUSE Ig gamma-2A chain C region, A allele OS=Mus musculus OX=10090 GN=Ighg PE=1 SV=1	45190	controllerType=0 controllerNumber=1 scan=22216	90.7516
14338:2	3	N.TEPVLDSDGSYF.M			665.291	2	1329.57	1329.58	0	-7.6	277	Non	318.17	128.06	128.06	8.41	3	>sp|P01863|GCAA_MOUSE Ig gamma-2A chain C region, A allele OS=Mus musculus OX=10090 GN=Ighg PE=1 SV=1	45190	controllerType=0 controllerNumber=1 scan=24938	97.0745
06641:2	3	N.TEPVLDSDGSY.F			591.758	2	1182.51	1182.52	0	-6.9	277	Non	323.33	78.14	78.14	7.23	3	>sp|P01863|GCAA_MOUSE Ig gamma-2A chain C region, A allele OS=Mus musculus OX=10090 GN=Ighg PE=1 SV=1	45190	controllerType=0 controllerNumber=1 scan=14288	69.6224
06797:2	52	F.TVGLDVDTRAY.F			605.306	2	1209.6	1209.61	0	-6	294	Non	345.87	129.9	129.9	9.9	1	>sp|P00397|COX1_MOUSE Cytochrome c oxidase subunit 1 OS=Mus musculus OX=10090 GN=Mtco1 PE=1 SV=2	39716	controllerType=0 controllerNumber=1 scan=14489	70.0507
07074:2	262	A.KYLGSTQLL.S			511.794	2	1022.58	1022.59	0	-6.6	221	Non	303.35	56.65	56.65	6.19	2	>sp|O88888|APBA3_MOUSE Amyloid-beta A4 precursor protein-binding family A member 3 OS=Mus musculus OX=10090 GN=Apba3 PE=1 SV=1	52377	controllerType=0 controllerNumber=1 scan=14931	71.4066
07809:2	101	L.GYSVVAINHI.V			536.789	2	1072.57	1072.58	0	-6.6	29	Non	336.62	130.57	130.57	8.73	1	>sp|O88796|RPP30_MOUSE Ribonuclease P protein subunit p30 OS=Mus musculus OX=10090 GN=Rpp30 PE=1 SV=1	48984	controllerType=0 controllerNumber=1 scan=16530	78.2614
07401:2	225	S.LYYTTVRAL.T			550.309	2	1099.61	1099.61	0	-4.2	38	Non	329.76	85.71	85.71	6.65	1	>sp|O70479|BACD2_MOUSE BTB/POZ domain-containing adapter for CUL3-mediated RhoA degradation protein 2 OS=Mus musculus OX=10090 GN=Tnfaip1 PE=2 SV=1	39413	controllerType=0 controllerNumber=1 scan=15952	76.766
06157:2	270	S.KFLPSSQEL.G			524.784	2	1048.56	1048.57	0	-5.7	1536	Non	321.76	23.5	23.5	6.14	2	>sp|O70472|TM131_MOUSE Transmembrane protein 131 OS=Mus musculus OX=10090 GN=Tmem131 PE=2 SV=2	44407	controllerType=0 controllerNumber=1 scan=13627	68.1031
07356:2	12	N.DYLADKSYI.E			544.266	2	1087.52	1087.53	0	-5.6	17	Non	370.89	123.65	123.65	9.19	4	>sp|O70251|EF1B_MOUSE Elongation factor 1-beta OS=Mus musculus OX=10090 GN=Eef1b PE=1 SV=5	46646	controllerType=0 controllerNumber=1 scan=15874	76.5016
06350:2	12	Y.VQSM[+15.995]DVAAFNKI.-		M[+16]	669.836	2	1338.66	1338.67	0	-6.2	214	Non	329	107.58	107.58	8.4	4	>sp|O70251|EF1B_MOUSE Elongation factor 1-beta OS=Mus musculus OX=10090 GN=Eef1b PE=1 SV=5	46646	controllerType=0 controllerNumber=1 scan=13902	68.7816
04830:2	12	D.YLADKSYI.E			486.752	2	972.497	972.504	0	-7.2	18	Non	265.63	38.71	38.71	3.98	4	>sp|O70251|EF1B_MOUSE Elongation factor 1-beta OS=Mus musculus OX=10090 GN=Eef1b PE=1 SV=5	46646	controllerType=0 controllerNumber=1 scan=11617	62.5133
05341:2	12	E.GYVPSQADV.A			468.224	2	935.44	935.447	0	-7	27	Non	233.29	73.8	73.8	3.51	4	>sp|O70251|EF1B_MOUSE Elongation factor 1-beta OS=Mus musculus OX=10090 GN=Eef1b PE=1 SV=5	46646	controllerType=0 controllerNumber=1 scan=12398	64.7459
04620:2	214	R.FYVASSRQL.K			535.782	2	1070.56	1070.56	0	-6.5	1129	CRagged	291	96.16	96.16	6.92	4	>sp|O35379|MRP1_MOUSE Multidrug resistance-associated protein 1 OS=Mus musculus OX=10090 GN=Abcc1 PE=1 SV=1	48157	controllerType=0 controllerNumber=1 scan=11333	61.8424
03767:2	139	K.YSAARSVPASNYV.-			692.842	2	1384.68	1384.69	0	-6.2	198	CRagged	296.49	124.85	124.85	8.2	1	>sp|O35054|CLD4_MOUSE Claudin-4 OS=Mus musculus OX=10090 GN=Cldn4 PE=1 SV=1	39578	controllerType=0 controllerNumber=1 scan=10106	58.6392
09331:2	215	N.LYLKQGIANL.S			566.835	2	1132.66	1132.67	0	-8.1	431	Non	278.84	48.08	48.08	6.85	1	>sp|O08750|NFIL3_MOUSE Nuclear factor interleukin-3-regulated protein OS=Mus musculus OX=10090 GN=Nfil3 PE=1 SV=1	53416	controllerType=0 controllerNumber=1 scan=18465	82.4207
04870:2	295	R.DYQDVRNEI.P			576.266	2	1151.52	1151.53	0	-7.1	559	CRagged	297.09	67.04	67.04	5.73	2	>sp|G5E829|AT2B1_MOUSE Plasma membrane calcium-transporting ATPase 1 OS=Mus musculus OX=10090 GN=Atp2b1 PE=1 SV=1	50354	controllerType=0 controllerNumber=1 scan=11672	62.6483
04625:2	177	Q.AYAPAIHQI.V			492.266	2	983.525	983.531	0	-6.4	938	Non	321.23	82.48	82.48	7.57	1	>sp|E9Q7E2|ARID2_MOUSE AT-rich interactive domain-containing protein 2 OS=Mus musculus OX=10090 GN=Arid2 PE=1 SV=1	40725	controllerType=0 controllerNumber=1 scan=11342	61.8746
03544:2	234	K.YM[+15.995]LTHQEL.A		M[+16]	525.746	2	1050.49	1050.49	0	-6.5	851	CRagged	293.56	76.33	76.33	6.18	1	>sp|E9Q5G3|KIF23_MOUSE Kinesin-like protein KIF23 OS=Mus musculus OX=10090 GN=Kif23 PE=1 SV=1	41480	controllerType=0 controllerNumber=1 scan=9759	57.6392
06314:2	72	S.APGPQRFSPAGL.Q			599.317	2	1197.63	1197.64	0	-8.1	1308	Non	347.13	106.86	106.86	9.33	2	>sp|E9Q309|CE350_MOUSE Centrosome-associated protein 350 OS=Mus musculus OX=10090 GN=Cep350 PE=1 SV=1	40462	controllerType=0 controllerNumber=1 scan=13857	68.6948
05720:2	377	G.KLDIVRTEL.S			543.826	2	1086.65	1086.65	0	-5.8	58	Non	286.62	4.56	4.56	1.98	1	>sp|D3Z3K2|CIP1_MOUSE E3 ubiquitin-protein ligase CCNB1IP1 OS=Mus musculus OX=10090 GN=Ccnb1ip1 PE=1 SV=1	40307	controllerType=0 controllerNumber=1 scan=12960	66.2218
09677:2	221	S.YYVYTQQEL.K			603.782	2	1206.56	1206.57	0	-9.2	1288	Non	285.26	69.6	69.6	6.77	3	>sp|B2RY04|DOCK5_MOUSE Dedicator of cytokinesis protein 5 OS=Mus musculus OX=10090 GN=Dock5 PE=1 SV=2	46670	controllerType=0 controllerNumber=1 scan=18899	83.3411
06885:2	413	K.SYSGSIQSL.T			471.229	2	941.451	941.457	0	-7.3	716	CRagged	270.4	49.09	49.09	1.47	1	>sp|B2RQE8|RHG42_MOUSE Rho GTPase-activating protein 42 OS=Mus musculus OX=10090 GN=Arhgap42 PE=1 SV=1	36844	controllerType=0 controllerNumber=1 scan=14598	70.2632
05884:2	385	Y.VYFVQKNSL.N			549.299	2	1097.59	1097.6	0	-6.6	78	Non	290.18	44.43	44.43	1.95	1	>sp|A8Y5H7|S14L1_MOUSE SEC14-like protein 1 OS=Mus musculus OX=10090 GN=Sec14l1 PE=1 SV=1	37972	controllerType=0 controllerNumber=1 scan=13208	66.9158
06030:2	308	H.TYLPQVSHY.R			554.273	2	1107.54	1107.55	0	-7.6	168	Non	319.59	35.26	35.26	5.44	1	>sp|A6H5Z3|EXC6B_MOUSE Exocyst complex component 6B OS=Mus musculus OX=10090 GN=Exoc6b PE=1 SV=1	45620	controllerType=0 controllerNumber=1 scan=13429	67.5302
06225:2	200	N.SYNKAISYL.A			529.776	2	1058.54	1058.55	0	-6.9	167	Non	344.62	64.79	64.79	7.11	2	>sp|A2ALW5|DJC25_MOUSE DnaJ homolog subfamily C member 25 OS=Mus musculus OX=10090 GN=Dnajc25 PE=1 SV=1	46332	controllerType=0 controllerNumber=1 scan=13734	68.4125
08198:2	320	T.GFNSSISNI.F			469.73	2	938.452	938.458	0	-6.3	1034	Non	257.64	46.24	46.24	4.98	2	>sp|A2AJ88|PLPL7_MOUSE Patatin-like phospholipase domain-containing protein 7 OS=Mus musculus OX=10090 GN=Pnpla7 PE=1 SV=1	51898	controllerType=0 controllerNumber=1 scan=17039	79.3906
15626:2	320	L.MGIGIGALLTL.A			529.813	2	1058.62	1058.63	0	-7.6	37	Non	192.72	34.78	34.78	3.07	2	>sp|A2AJ88|PLPL7_MOUSE Patatin-like phospholipase domain-containing protein 7 OS=Mus musculus OX=10090 GN=Pnpla7 PE=1 SV=1	51898	controllerType=0 controllerNumber=1 scan=26754	101.758
07531:2	120	V.TFHPTISGL.I			486.758	2	972.509	972.515	0	-6.2	102	Non	344.95	106.13	106.13	8.45	2	>sp|A2AH22|AMRA1_MOUSE Activating molecule in BECN1-regulated autophagy protein 1 OS=Mus musculus OX=10090 GN=Ambra1 PE=1 SV=1	52468	controllerType=0 controllerNumber=1 scan=16174	77.4931
13024:2	120	A.SMGGFGNNIIV.S			554.775	2	1108.54	1108.55	0	-2.7	1175	Non	179.93	22.85	22.85	1.75	2	>sp|A2AH22|AMRA1_MOUSE Activating molecule in BECN1-regulated autophagy protein 1 OS=Mus musculus OX=10090 GN=Ambra1 PE=1 SV=1	52468	controllerType=0 controllerNumber=1 scan=23198	92.9346
05177:2	261	E.KFSSSLNTL.S			498.768	2	996.529	996.536	0	-7	787	Non	329.15	64.66	64.66	6.19	1	>sp|A2A870|FBF1_MOUSE Fas-binding factor 1 OS=Mus musculus OX=10090 GN=Fbf1 PE=1 SV=1	46136	controllerType=0 controllerNumber=1 scan=12124	63.8688
04427:2	396	E.KFSSSLNTL.S			498.769	2	996.53	996.536	0	-5.8	787	Non	297.76	61.43	61.43	2.5	1	>sp|A2A870|FBF1_MOUSE Fas-binding factor 1 OS=Mus musculus OX=10090 GN=Fbf1 PE=1 SV=1	46136	controllerType=0 controllerNumber=1 scan=6807	20.8288
08561:2	130	K.SFSSAPPLILT.C			566.815	2	1132.62	1132.62	0	-1.2	310	CRagged	434.4	191.65	191.65	7.45	1	>sp|A2AM29|AF9_MOUSE Protein AF-9 OS=Mus musculus OX=10090 GN=Mllt3 PE=1 SV=1	52621	controllerType=0 controllerNumber=1 scan=12787	36.0833
06890:2	243	R.VTPYILKKLDSI.-			695.419	2	1389.83	1389.84	0	-2.8	40	CRagged	211.55	93.27	93.27	2.13	4	>sp|B1AXP6|TOM5_MOUSE Mitochondrial import receptor subunit TOM5 homolog OS=Mus musculus OX=10090 GN=Tomm5 PE=3 SV=1	44950	controllerType=0 controllerNumber=1 scan=10345	29.8608
03225:3	243	L.LRVTPYILKK.L			410.934	3	1230.79	1230.79	0	-4.6	38	NRagged	245.26	23.78	23.78	2.07	4	>sp|B1AXP6|TOM5_MOUSE Mitochondrial import receptor subunit TOM5 homolog OS=Mus musculus OX=10090 GN=Tomm5 PE=3 SV=1	44950	controllerType=0 controllerNumber=1 scan=5258	17.8887
07352:2	243	S.SIRNFLIY.V			513.291	2	1025.57	1025.58	0	-3.2	27	Non	285.13	11.96	11.96	1.96	4	>sp|B1AXP6|TOM5_MOUSE Mitochondrial import receptor subunit TOM5 homolog OS=Mus musculus OX=10090 GN=Tomm5 PE=3 SV=1	44950	controllerType=0 controllerNumber=1 scan=11005	31.464
06886:2	243	R.VTPYILKKLDSI.-			695.419	2	1389.83	1389.84	0	-3.6	40	CRagged	200.09	72.42	72.42	1.46	4	>sp|B1AXP6|TOM5_MOUSE Mitochondrial import receptor subunit TOM5 homolog OS=Mus musculus OX=10090 GN=Tomm5 PE=3 SV=1	44950	controllerType=0 controllerNumber=1 scan=10339	29.8444
07020:2	338	E.GYAKLIAEL.G			489.285	2	977.562	977.567	0	-4.7	171	Non	300.8	49.31	49.31	3.03	1	>sp|B1AZI6|THOC2_MOUSE THO complex subunit 2 OS=Mus musculus OX=10090 GN=Thoc2 PE=1 SV=1	38868	controllerType=0 controllerNumber=1 scan=10527	30.2904
03249:3	207	Q.SPQPGHIINPASMK.R			492.923	3	1476.76	1476.76	0	-4.9	1825	NRagged	273.84	101.22	101.22	6.42	1	>sp|E9PVX6|KI67_MOUSE Proliferation marker protein Ki-67 OS=Mus musculus OX=10090 GN=Mki67 PE=1 SV=1	41543	controllerType=0 controllerNumber=1 scan=5287	17.9339
02851:2	43	E.KYMLTHQEL.A			581.798	2	1162.59	1162.59	0	-2.5	850	Non	329.62	108.6	108.6	6.3	2	>sp|E9Q5G3|KIF23_MOUSE Kinesin-like protein KIF23 OS=Mus musculus OX=10090 GN=Kif23 PE=1 SV=1	41480	controllerType=0 controllerNumber=1 scan=4756	16.8051
04436:2	43	K.YMLTHQEL.A			517.75	2	1034.49	1034.5	0	-5.6	851	CRagged	380.49	149.54	149.54	6.25	2	>sp|E9Q5G3|KIF23_MOUSE Kinesin-like protein KIF23 OS=Mus musculus OX=10090 GN=Kif23 PE=1 SV=1	41480	controllerType=0 controllerNumber=1 scan=6819	20.855
07119:2	263	R.TYLKDLEVI.A			547.31	2	1093.61	1093.61	0	-1.8	556	CRagged	377.94	50.05	50.05	4.19	2	>sp|F8VPU2|FARP1_MOUSE FERM, ARHGEF and pleckstrin domain-containing protein 1 OS=Mus musculus OX=10090 GN=Farp1 PE=1 SV=1	45560	controllerType=0 controllerNumber=1 scan=10675	30.6808
03964:2	49	D.AQLDAYNARMDTS.-			728.325	2	1455.64	1455.65	0	-7	243	Non	257.87	142.97	142.97	6.27	2	>sp|O08583|THOC4_MOUSE THO complex subunit 4 OS=Mus musculus OX=10090 GN=Alyref PE=1 SV=3	44957	controllerType=0 controllerNumber=1 scan=6213	19.7323
05118:2	49	L.FAEFGTLK.K			456.742	2	912.476	912.482	0	-6.7	125	NRagged	338.02	84.07	84.07	5.89	2	>sp|O08583|THOC4_MOUSE THO complex subunit 4 OS=Mus musculus OX=10090 GN=Alyref PE=1 SV=3	44957	controllerType=0 controllerNumber=1 scan=7754	23.0324
08606:2	445	I.LVAAGLLFLPVTV.C			656.913	2	1312.82	1312.82	0	-4.6	6	Non	198.61	47.08	47.08	1.61	1	>sp|O08675|PAR3_MOUSE Proteinase-activated receptor 3 OS=Mus musculus OX=10090 GN=F2rl2 PE=1 SV=2	50854	controllerType=0 controllerNumber=1 scan=12853	36.2484
08131:2	208	R.EANLAAAFGKPINF.-			731.889	2	1462.77	1462.77	0	0.8	496	CRagged	376.25	245.96	245.96	6.39	1	>sp|O08749|DLDH_MOUSE Dihydrolipoyl dehydrogenase, mitochondrial OS=Mus musculus OX=10090 GN=Dld PE=1 SV=2	46365	controllerType=0 controllerNumber=1 scan=12159	34.513
02702:3	303	A.AYRDVEREL.G			384.199	3	1150.58	1150.59	0	-2.7	6	Non	249.81	63.44	63.44	3.44	1	>sp|O09061|PSB1_MOUSE Proteasome subunit beta type-1 OS=Mus musculus OX=10090 GN=Psmb1 PE=1 SV=1	52163	controllerType=0 controllerNumber=1 scan=4546	16.2972
04190:2	178	R.FYVASSRQL.K			535.784	2	1070.56	1070.56	0	-1.6	1129	CRagged	328.82	108.05	108.05	6.82	2	>sp|O35379|MRP1_MOUSE Multidrug resistance-associated protein 1 OS=Mus musculus OX=10090 GN=Abcc1 PE=1 SV=1	48157	controllerType=0 controllerNumber=1 scan=6498	20.2279
06666:2	15	L.AAMLDTVVFK.-			547.798	2	1094.59	1094.59	0	-2.1	301	NRagged	449.28	177.9	177.9	7.98	3	>sp|O35593|PSDE_MOUSE 26S proteasome non-ATPase regulatory subunit 14 OS=Mus musculus OX=10090 GN=Psmd14 PE=1 SV=2	37394	controllerType=0 controllerNumber=1 scan=10026	29.0473
06633:2	15	L.AAMLDTVVFK.-			547.798	2	1094.59	1094.59	0	-3.3	301	NRagged	404.83	154.64	154.64	7.6	3	>sp|O35593|PSDE_MOUSE 26S proteasome non-ATPase regulatory subunit 14 OS=Mus musculus OX=10090 GN=Psmd14 PE=1 SV=2	37394	controllerType=0 controllerNumber=1 scan=9978	28.9255
06570:2	15	A.AMLDTVVFK.-			512.278	2	1023.55	1023.55	0	-4.9	302	NRagged	357.1	57.03	57.03	5.62	3	>sp|O35593|PSDE_MOUSE 26S proteasome non-ATPase regulatory subunit 14 OS=Mus musculus OX=10090 GN=Psmd14 PE=1 SV=2	37394	controllerType=0 controllerNumber=1 scan=9878	28.6195
04729:2	15	M.LDTVVFK.-			411.24	2	821.473	821.477	0	-4.8	304	NRagged	395.12	55.88	55.88	4.63	3	>sp|O35593|PSDE_MOUSE 26S proteasome non-ATPase regulatory subunit 14 OS=Mus musculus OX=10090 GN=Psmd14 PE=1 SV=2	37394	controllerType=0 controllerNumber=1 scan=7205	21.6397
07061:2	441	I.DLLDIRHEF.K			579.299	2	1157.59	1157.59	0	-3	283	Non	315.06	38.86	38.86	1.65	2	>sp|O35639|ANXA3_MOUSE Annexin A3 OS=Mus musculus OX=10090 GN=Anxa3 PE=1 SV=4	52770	controllerType=0 controllerNumber=1 scan=10582	30.4056
08564:2	86	F.EILPGLAIM[+15.995]G.V		M[+16]	515.285	2	1029.56	1029.56	0	-1.7	4	Non	384.44	96.7	96.7	7.47	1	>sp|O35683|NDUA1_MOUSE NADH dehydrogenase [ubiquinone] 1 alpha subcomplex subunit 1 OS=Mus musculus OX=10090 GN=Ndufa1 PE=1 SV=1	48372	controllerType=0 controllerNumber=1 scan=12791	36.0916
05139:2	411	K.SFTPDHVVY.A			532.753	2	1064.5	1064.5	0	-5.6	302	CRagged	271.95	65.14	65.14	2.29	1	>sp|O54724|CAVN1_MOUSE Caveolae-associated protein 1 OS=Mus musculus OX=10090 GN=Cavin1 PE=1 SV=1	40081	controllerType=0 controllerNumber=1 scan=7784	23.1061
04771:2	146	S.VGASKAVFL.W			446.266	2	891.524	891.53	0	-6.2	232	Non	382.56	81.32	81.32	7.14	1	>sp|O54927|WSB1_MOUSE WD repeat and SOCS box-containing protein 1 OS=Mus musculus OX=10090 GN=Wsb1 PE=1 SV=1	44565	controllerType=0 controllerNumber=1 scan=7261	21.7577
04737:2	146	S.VGASKAVFL.W			446.265	2	891.524	891.53	0	-7	232	Non	387.17	77.58	77.58	6.6	1	>sp|O54927|WSB1_MOUSE WD repeat and SOCS box-containing protein 1 OS=Mus musculus OX=10090 GN=Wsb1 PE=1 SV=1	44565	controllerType=0 controllerNumber=1 scan=7214	21.6502
07396:2	172	L.TYGALVTQL.C			483.266	2	965.524	965.53	0	-6.2	22	Non	371.08	96.73	96.73	6.85	1	>sp|O55013|TPPC3_MOUSE Trafficking protein particle complex subunit 3 OS=Mus musculus OX=10090 GN=Trappc3 PE=1 SV=1	44364	controllerType=0 controllerNumber=1 scan=11076	31.6891
03279:2	165	D.IYDKIKTGL.S			525.812	2	1050.62	1050.62	0	-2.3	114	Non	351.73	118.33	118.33	6.99	3	>sp|O70503|DHB12_MOUSE Very-long-chain 3-oxoacyl-CoA reductase OS=Mus musculus OX=10090 GN=Hsd17b12 PE=1 SV=1	45679	controllerType=0 controllerNumber=1 scan=5329	18.0304
03273:3	165	D.IYDKIKTGL.S			350.877	3	1050.62	1050.62	0	-3.4	114	Non	192.4	43.5	43.5	3.38	3	>sp|O70503|DHB12_MOUSE Very-long-chain 3-oxoacyl-CoA reductase OS=Mus musculus OX=10090 GN=Hsd17b12 PE=1 SV=1	45679	controllerType=0 controllerNumber=1 scan=5319	17.9999
03678:2	269	T.SPATPLPAGSGIK.R			598.337	2	1195.67	1195.67	0	-1.1	203	NRagged	309	64.72	64.72	4.13	1	>sp|O88271|CFDP1_MOUSE Craniofacial development protein 1 OS=Mus musculus OX=10090 GN=Cfdp1 PE=1 SV=1	40628	controllerType=0 controllerNumber=1 scan=5858	19.1185
06130:2	257	A.KYAPSGFYI.A			523.268	2	1045.53	1045.54	0	-6.4	65	Non	320.7	103.62	103.62	4.29	1	>sp|O88342|WDR1_MOUSE WD repeat-containing protein 1 OS=Mus musculus OX=10090 GN=Wdr1 PE=1 SV=3	44535	controllerType=0 controllerNumber=1 scan=9250	27.055
06119:2	257	A.KYAPSGFYI.A			523.268	2	1045.53	1045.54	0	-5.9	65	Non	287.2	54.37	54.37	2.8	1	>sp|O88342|WDR1_MOUSE WD repeat-containing protein 1 OS=Mus musculus OX=10090 GN=Wdr1 PE=1 SV=3	44535	controllerType=0 controllerNumber=1 scan=9231	26.9888
04152:2	350	S.SLVVLAAGGR.R			471.788	2	942.57	942.573	0	-3.7	705	NRagged	331.4	19.78	19.78	2.89	4	>sp|O88444|ADCY1_MOUSE Adenylate cyclase type 1 OS=Mus musculus OX=10090 GN=Adcy1 PE=1 SV=2	52615	controllerType=0 controllerNumber=1 scan=6448	20.1337
04847:2	425	K.QPLRGIGI.L			427.264	2	853.52	853.525	0	-6.2	116	CRagged	243.35	55.68	55.68	1.78	1	>sp|O88543|CSN3_MOUSE COP9 signalosome complex subunit 3 OS=Mus musculus OX=10090 GN=Cops3 PE=1 SV=3	50458	controllerType=0 controllerNumber=1 scan=7365	21.9973
03858:2	255	E.YYVGAAHGL.A			475.738	2	950.468	950.473	0	-5.2	213	Non	318.17	75.95	75.95	4.33	1	>sp|O89112|LANC1_MOUSE LanC-like protein 1 OS=Mus musculus OX=10090 GN=Lancl1 PE=1 SV=1	46852	controllerType=0 controllerNumber=1 scan=6086	19.5452
03053:3	97	R.TFGGGTKLEIK.-			384.22	3	1150.64	1150.65	0	-2.2	101	Specific	418.95	166.9	166.9	7.93	1	>sp|P01670|KV3AI_MOUSE Ig kappa chain V-III region PC 6684 OS=Mus musculus OX=10090 PE=1 SV=1	41764	controllerType=0 controllerNumber=1 scan=5032	17.4387
03059:2	97	R.TFGGGTKLEIK.-			575.826	2	1150.64	1150.65	0	-2.2	101	Specific	407.83	210.21	210.21	7.19	1	>sp|P01670|KV3AI_MOUSE Ig kappa chain V-III region PC 6684 OS=Mus musculus OX=10090 PE=1 SV=1	41764	controllerType=0 controllerNumber=1 scan=5040	17.4523
03803:2	34	K.TSTSPIVKSFN.R			590.811	2	1180.62	1180.62	0	-4.7	93	CRagged	391.26	200.63	200.63	7.59	3	>sp|P01837|IGKC_MOUSE Immunoglobulin kappa constant OS=Mus musculus OX=10090 GN=Igkc PE=1 SV=2	43440	controllerType=0 controllerNumber=1 scan=6018	19.4109
01779:2	34	K.TSTSPIVK.S			416.742	2	832.476	832.477	0	-1.2	93	Specific	428.49	69.25	69.25	5.57	3	>sp|P01837|IGKC_MOUSE Immunoglobulin kappa constant OS=Mus musculus OX=10090 GN=Igkc PE=1 SV=2	43440	controllerType=0 controllerNumber=1 scan=3106	11.9141
02619:2	34	K.TSTSPIVK.S			416.74	2	832.473	832.477	0	-5.6	93	Specific	434.26	66.62	66.62	5.3	3	>sp|P01837|IGKC_MOUSE Immunoglobulin kappa constant OS=Mus musculus OX=10090 GN=Igkc PE=1 SV=2	43440	controllerType=0 controllerNumber=1 scan=4426	15.9879
02747:2	34	K.TSTSPIVK.S			416.741	2	832.475	832.477	0	-2.9	93	Specific	419.51	77.78	77.78	5.18	3	>sp|P01837|IGKC_MOUSE Immunoglobulin kappa constant OS=Mus musculus OX=10090 GN=Igkc PE=1 SV=2	43440	controllerType=0 controllerNumber=1 scan=4616	16.5016
02458:2	34	K.TSTSPIVK.S			416.741	2	832.476	832.477	0	-2	93	Specific	387.21	4.12	4.12	3.99	3	>sp|P01837|IGKC_MOUSE Immunoglobulin kappa constant OS=Mus musculus OX=10090 GN=Igkc PE=1 SV=2	43440	controllerType=0 controllerNumber=1 scan=4199	15.442
01872:2	34	K.TSTSPIVK.S			416.74	2	832.474	832.477	0	-4.4	93	Specific	305.66	5.8	5.8	2.83	3	>sp|P01837|IGKC_MOUSE Immunoglobulin kappa constant OS=Mus musculus OX=10090 GN=Igkc PE=1 SV=2	43440	controllerType=0 controllerNumber=1 scan=3262	12.4446
02915:2	34	K.TSTSPIVK.S			416.74	2	832.473	832.477	0	-5.8	93	Specific	349.16	8.96	8.96	2.38	3	>sp|P01837|IGKC_MOUSE Immunoglobulin kappa constant OS=Mus musculus OX=10090 GN=Igkc PE=1 SV=2	43440	controllerType=0 controllerNumber=1 scan=4845	17.0122
02698:3	34	K.TSTSPIVKSFNR.N			446.244	3	1336.72	1336.72	0	-3.5	93	Specific	229.96	37.35	37.35	2.37	3	>sp|P01837|IGKC_MOUSE Immunoglobulin kappa constant OS=Mus musculus OX=10090 GN=Igkc PE=1 SV=2	43440	controllerType=0 controllerNumber=1 scan=4540	16.2806
08383:2	12	N.TEPVLDSDGSYFM.Y			730.814	2	1460.62	1460.62	0	-2.8	277	Non	427.6	271.82	271.82	8.84	6	>sp|P01863|GCAA_MOUSE Ig gamma-2A chain C region, A allele OS=Mus musculus OX=10090 GN=Ighg PE=1 SV=1	45190	controllerType=0 controllerNumber=1 scan=12525	35.4182
00959:3	12	R.TISKPKGSVR.A			358.218	3	1072.64	1072.65	0	-7	218	Specific	359.84	142.61	142.61	6.02	6	>sp|P01863|GCAA_MOUSE Ig gamma-2A chain C region, A allele OS=Mus musculus OX=10090 GN=Ighg PE=1 SV=1	45190	controllerType=0 controllerNumber=1 scan=1715	7.0241
01579:2	12	K.SFSRTPG.K			376.19	2	751.372	751.373	0	-1.7	323	CRagged	384.04	79.16	79.16	5.1	6	>sp|P01863|GCAA_MOUSE Ig gamma-2A chain C region, A allele OS=Mus musculus OX=10090 GN=Ighg PE=1 SV=1	45190	controllerType=0 controllerNumber=1 scan=2747	10.631
01882:2	12	K.TELNYK.N			384.198	2	767.388	767.393	0	-6.5	270	Specific	350.34	63.49	63.49	3.86	6	>sp|P01863|GCAA_MOUSE Ig gamma-2A chain C region, A allele OS=Mus musculus OX=10090 GN=Ighg PE=1 SV=1	45190	controllerType=0 controllerNumber=1 scan=3278	12.495
04511:2	12	K.DLPAPIER.T			455.751	2	910.494	910.499	0	-5.6	210	Specific	270.51	13.62	13.62	2.04	6	>sp|P01863|GCAA_MOUSE Ig gamma-2A chain C region, A allele OS=Mus musculus OX=10090 GN=Ighg PE=1 SV=1	45190	controllerType=0 controllerNumber=1 scan=6913	21.0178
04454:2	13	A.IQKTPQIQVY.S			609.345	2	1217.68	1217.69	0	-5.7	21	Non	347.76	133.55	133.55	7.52	3	>sp|P01887|B2MG_MOUSE Beta-2-microglobulin OS=Mus musculus OX=10090 GN=B2m PE=1 SV=2	39731	controllerType=0 controllerNumber=1 scan=6842	20.8962
04315:2	13	A.IQKTPQIQVYS.R			652.86	2	1304.71	1304.72	0	-5.7	21	Non	296.05	115.28	115.28	6.74	3	>sp|P01887|B2MG_MOUSE Beta-2-microglobulin OS=Mus musculus OX=10090 GN=B2m PE=1 SV=2	39731	controllerType=0 controllerNumber=1 scan=6663	20.5621
03404:2	13	Q.KTPQIQVYS.R			532.291	2	1063.58	1063.58	0	-2.7	23	Non	280.39	88.04	88.04	6.67	3	>sp|P01887|B2MG_MOUSE Beta-2-microglobulin OS=Mus musculus OX=10090 GN=B2m PE=1 SV=2	39731	controllerType=0 controllerNumber=1 scan=5497	18.3887
04121:2	13	A.IQKTPQIQVYS.R			652.862	2	1304.72	1304.72	0	-3.7	21	Non	230.41	71.92	71.92	4.69	3	>sp|P01887|B2MG_MOUSE Beta-2-microglobulin OS=Mus musculus OX=10090 GN=B2m PE=1 SV=2	39731	controllerType=0 controllerNumber=1 scan=6408	20.056
07841:2	39	K.TWTAADMAAQIT.R			640.301	2	1279.59	1279.6	0	-3.1	156	CRagged	427.47	197.33	197.33	7.47	3	>sp|P01900|HA12_MOUSE H-2 class I histocompatibility antigen, D-D alpha chain OS=Mus musculus OX=10090 GN=H2-D1 PE=1 SV=1	45946	controllerType=0 controllerNumber=1 scan=11730	33.3675
07844:2	39	K.TWTAADMAAQIT.R			640.302	2	1279.6	1279.6	0	-1.5	156	CRagged	430.56	223.52	223.52	7.2	3	>sp|P01900|HA12_MOUSE H-2 class I histocompatibility antigen, D-D alpha chain OS=Mus musculus OX=10090 GN=H2-D1 PE=1 SV=1	45946	controllerType=0 controllerNumber=1 scan=11735	33.3832
03460:2	39	A.GSHSLRYFVT.A			583.798	2	1166.59	1166.6	0	-4.8	25	Non	264.79	75.91	75.91	4.9	3	>sp|P01900|HA12_MOUSE H-2 class I histocompatibility antigen, D-D alpha chain OS=Mus musculus OX=10090 GN=H2-D1 PE=1 SV=1	45946	controllerType=0 controllerNumber=1 scan=5576	18.5787
06392:2	39	G.AMAPRTLLL.L			493.296	2	985.584	985.586	0	-2.1	3	Non	304.66	27.03	27.03	3.59	3	>sp|P01900|HA12_MOUSE H-2 class I histocompatibility antigen, D-D alpha chain OS=Mus musculus OX=10090 GN=H2-D1 PE=1 SV=1	45946	controllerType=0 controllerNumber=1 scan=9623	27.9737
03926:2	461	G.DSGPPGPQGL.Q			462.723	2	924.439	924.442	0	-3.2	630	Non	272.61	65.22	65.22	1.5	1	>sp|P08121|CO3A1_MOUSE Collagen alpha-1(III) chain OS=Mus musculus OX=10090 GN=Col3a1 PE=1 SV=4	39613	controllerType=0 controllerNumber=1 scan=6165	19.6513
06930:2	60	A.YYLNDLERI.A			599.807	2	1198.61	1198.61	0	-3.1	155	Non	364.4	75.51	75.51	7.17	2	>sp|P08752|GNAI2_MOUSE Guanine nucleotide-binding protein G(i) subunit alpha-2 OS=Mus musculus OX=10090 GN=Gnai2 PE=1 SV=5	42097	controllerType=0 controllerNumber=1 scan=10404	30.0178
07090:2	60	A.YYLNDLERI.A			599.808	2	1198.61	1198.61	0	-0.6	155	Non	291.84	86.18	86.18	5.67	2	>sp|P08752|GNAI2_MOUSE Guanine nucleotide-binding protein G(i) subunit alpha-2 OS=Mus musculus OX=10090 GN=Gnai2 PE=1 SV=5	42097	controllerType=0 controllerNumber=1 scan=10628	30.5397
04377:2	60	N.KYDEAASYI.Q			530.251	2	1059.5	1059.5	0	-3.9	296	Non	270.09	40.71	40.71	4	2	>sp|P08752|GNAI2_MOUSE Guanine nucleotide-binding protein G(i) subunit alpha-2 OS=Mus musculus OX=10090 GN=Gnai2 PE=1 SV=5	42097	controllerType=0 controllerNumber=1 scan=6744	20.7193
03834:2	11	K.SAVTTVVNPKYEG.K			682.853	2	1364.7	1364.71	0	-4.8	785	CRagged	349.85	210	210	7.56	3	>sp|P09055|ITB1_MOUSE Integrin beta-1 OS=Mus musculus OX=10090 GN=Itgb1 PE=1 SV=1	41455	controllerType=0 controllerNumber=1 scan=6058	19.4873
02680:2	11	K.SAVTTVVNPKYEGK.-			746.902	2	1492.8	1492.8	0	-2.9	785	Specific	443.01	265.16	265.16	7.22	3	>sp|P09055|ITB1_MOUSE Integrin beta-1 OS=Mus musculus OX=10090 GN=Itgb1 PE=1 SV=1	41455	controllerType=0 controllerNumber=1 scan=4515	16.221
02675:3	11	K.SAVTTVVNPKYEGK.-			498.271	3	1492.8	1492.8	0	-2.3	785	Specific	351.19	162.95	162.95	7.11	3	>sp|P09055|ITB1_MOUSE Integrin beta-1 OS=Mus musculus OX=10090 GN=Itgb1 PE=1 SV=1	41455	controllerType=0 controllerNumber=1 scan=4508	16.2054
[truncated: 712 more rows]

## Sheet: Sheet3
Supplementary data file 1 for Peltonen et al.,
List of identified peptides using the Uniprot extended database with 92607 entries
[truncated: 2,482 more rows]

## Sheet: Sheet4
Supplementary data file 1 for Peltonen et al.,
[truncated: 652 more rows]

## Sheet: Sheet5
Supplementary data file 1 for Peltonen et al.,
[truncated: 652 more rows]
